# Supplementary material for: Prediction of carbamylated lysine sites based on the one-class k -nearest neighbor method
Source: Royal Society of Chemistry journal article supplement (doi:10.1039/c3mb70195f), 2013-08-13
Supplement: c3mb70195f.csv [file c3mb70195f.csv]

class	AA1_disorder	AA2_disorder	AA3_disorder	AA4_disorder	AA5_disorder	AA6_disorder	AA7_disorder	AA8_disorder	AA9_disorder	AA10_disorder	AA11_disorder	AA12_disorder	AA13_disorder	AA14_disorder	AA15_disorder	AA16_disorder	AA17_disorder	AA18_disorder	AA19_disorder	AA20_disorder	AA21_disorder	AA1_pssm_1	AA1_pssm_2	AA1_pssm_3	AA1_pssm_4	AA1_pssm_5	AA1_pssm_6	AA1_pssm_7	AA1_pssm_8	AA1_pssm_9	AA1_pssm_10	AA1_pssm_11	AA1_pssm_12	AA1_pssm_13	AA1_pssm_14	AA1_pssm_15	AA1_pssm_16	AA1_pssm_17	AA1_pssm_18	AA1_pssm_19	AA1_pssm_20	AA2_pssm_1	AA2_pssm_2	AA2_pssm_3	AA2_pssm_4	AA2_pssm_5	AA2_pssm_6	AA2_pssm_7	AA2_pssm_8
1	0.310559	0.310245	0.275115	0.232994	0.201082	0.176429	0.148248	0.139542	0.135841	0.128850	0.131762	0.136374	0.141200	0.134271	0.133225	0.129332	0.129110	0.136721	0.162956	0.173537	0.184860	1	0	-1	5	-4	0	2	1	-3	-4	-4	0	-2	-4	1	-2	-3	0	-3	-2	-1	0	0	2	-4	-1	1	4
1	0.284583	0.318997	0.331733	0.326733	0.288443	0.230018	0.175159	0.127319	0.086648	0.062871	0.056810	0.050163	0.050060	0.051210	0.046947	0.048301	0.058795	0.072416	0.086306	0.104887	0.151518	-1	-2	2	-2	-4	-4	-4	6	-2	-4	-5	-4	-5	-5	-1	-1	-3	-5	-5	-5	-3	1	0	3	-6	1	4	-3
1	0.209677	0.224661	0.252711	0.262963	0.295773	0.325371	0.359366	0.417385	0.503978	0.570837	0.595934	0.610069	0.616948	0.585912	0.557068	0.548273	0.522607	0.496247	0.456895	0.426181	0.394513	-1	-1	0	4	-4	1	5	-2	-1	-4	-4	0	-3	-4	-2	0	-1	-4	-3	-3	0	-3	-3	-4	8	-3	-4	-3
1	0.381611	0.376049	0.375336	0.379286	0.362035	0.340899	0.334190	0.333477	0.386814	0.440190	0.476466	0.503419	0.513520	0.508626	0.494156	0.485570	0.460203	0.447859	0.414931	0.377858	0.331744	-1	-1	-1	1	-4	2	6	-3	-1	-4	-3	0	-3	-4	-2	-1	-1	-3	-3	-3	0	-3	-1	-2	-1	-2	-3	6
1	0.329120	0.321946	0.334866	0.351307	0.365339	0.400370	0.442496	0.514425	0.596940	0.659072	0.684322	0.695522	0.687803	0.655602	0.639289	0.631508	0.593609	0.598095	0.565545	0.512840	0.446599	-1	0	0	2	-4	2	5	-2	0	-4	-3	1	-2	-4	-1	0	-1	-3	-2	-3	0	-4	-3	-4	9	-3	-4	-3
1	0.101586	0.088223	0.076628	0.085589	0.098404	0.117053	0.151849	0.186770	0.251749	0.348344	0.423274	0.473716	0.515547	0.520088	0.507787	0.502366	0.500012	0.482988	0.453726	0.416325	0.373836	-3	-2	-2	-4	-3	-2	-3	-4	4	-2	-1	-3	-2	2	-4	-2	-2	1	8	-2	0	-1	-1	3	-4	4	3	0
1	0.427278	0.456943	0.508964	0.467734	0.430460	0.393096	0.335594	0.253146	0.204715	0.151955	0.099098	0.070153	0.058850	0.051875	0.054723	0.056465	0.054356	0.054622	0.074348	0.097324	0.118439	2	1	1	1	-4	1	0	-1	-3	-2	-1	0	0	-1	-4	1	2	-2	-3	-2	-2	2	-2	-2	-5	5	2	-2
1	0.189065	0.150913	0.116727	0.080023	0.064120	0.058488	0.055249	0.055263	0.055526	0.056365	0.051626	0.046904	0.042101	0.034715	0.039072	0.042383	0.048192	0.058931	0.066832	0.066777	0.064989	-2	-1	-2	-2	-3	0	4	-4	-2	0	0	-1	-1	-3	-3	-2	-2	-4	-3	4	2	2	1	2	-4	1	2	-2
1	0.191799	0.185880	0.179734	0.163715	0.152072	0.146640	0.124809	0.100517	0.078513	0.057826	0.034218	0.022257	0.017957	0.018121	0.020817	0.024429	0.026495	0.030064	0.043881	0.061312	0.075590	1	1	0	2	-4	1	1	0	-3	-3	-2	0	-2	-1	-4	1	2	-5	-3	-2	-1	2	0	-2	-5	4	2	-3
1	0.229687	0.245946	0.246682	0.217441	0.182486	0.152290	0.115289	0.082746	0.064760	0.052056	0.034074	0.024170	0.018152	0.016781	0.017221	0.021455	0.023440	0.026645	0.046172	0.078601	0.108608	1	1	0	1	-4	1	0	0	-3	-3	-2	0	0	-2	-4	1	3	-2	-3	-2	-1	2	0	-1	-5	5	2	-3
1	0.175886	0.122640	0.078718	0.056436	0.054817	0.060601	0.064750	0.074526	0.097812	0.116193	0.125383	0.137909	0.147467	0.140098	0.132647	0.133252	0.126723	0.117170	0.108966	0.093606	0.077904	-2	-2	-2	2	-5	0	6	-3	-2	-4	-4	0	-4	-5	0	-1	-3	-4	-4	-4	-1	-2	-3	-3	-4	7	-1	-4
1	0.057586	0.052742	0.051548	0.053573	0.060371	0.069187	0.073570	0.073545	0.075096	0.083141	0.094195	0.110415	0.139130	0.159952	0.160341	0.158055	0.140976	0.118941	0.090214	0.073418	0.059485	-4	-3	-2	-4	-6	-2	-2	-5	11	-6	-6	-3	-4	-4	-5	-4	-5	-5	-1	-6	-1	0	-2	-2	-5	-1	0	5
1	0.268434	0.217181	0.171043	0.141096	0.114571	0.102868	0.099036	0.116430	0.151039	0.188645	0.250595	0.320799	0.362057	0.388269	0.425451	0.440559	0.480273	0.530726	0.600185	0.641936	0.644398	-1	-2	-5	-3	-4	-4	-2	-3	-5	3	2	-2	4	2	0	-3	-1	-4	0	1	4	-2	-4	-2	-1	-1	0	1
1	0.141593	0.114561	0.103472	0.095188	0.108255	0.123137	0.131231	0.146470	0.172022	0.194812	0.203498	0.234018	0.262505	0.255530	0.231503	0.226581	0.196932	0.166430	0.157566	0.143238	0.128101	0	-2	-1	2	-5	1	6	-3	-2	-5	-4	-1	-4	-5	-3	-1	-3	-5	-4	-4	-1	-2	-3	-3	-4	7	1	-4
1	0.193049	0.152127	0.116885	0.091235	0.080201	0.074072	0.072651	0.082432	0.105362	0.138455	0.163291	0.190207	0.218724	0.221824	0.209062	0.220870	0.214410	0.207405	0.207119	0.198997	0.173883	1	-2	-2	2	-5	1	6	-3	-2	-5	-4	-1	-4	-5	-3	-1	-2	-5	-4	-4	0	-2	-3	-3	-4	7	1	-4
1	0.137181	0.118877	0.109802	0.080423	0.061179	0.051991	0.047257	0.046342	0.053092	0.056901	0.061093	0.069362	0.078243	0.080278	0.092152	0.125721	0.189328	0.249124	0.323811	0.403474	0.458643	2	0	-2	2	-5	1	4	-1	-2	-4	-3	1	-3	-6	0	-1	0	-6	-4	-3	-1	-5	-6	-6	-2	-3	-5	-6
1	0.289148	0.262707	0.220780	0.186919	0.158818	0.130661	0.117557	0.107791	0.108547	0.105044	0.093433	0.080579	0.067308	0.048350	0.038209	0.042527	0.052528	0.071444	0.102900	0.144739	0.201777	2	1	1	3	-4	2	2	0	4	-5	-5	-2	-4	-2	-4	0	-1	-5	-2	-4	4	2	-3	-4	-1	-1	-3	-1
1	0.115594	0.098267	0.088708	0.076604	0.066198	0.059037	0.050670	0.040290	0.036214	0.035890	0.037389	0.044599	0.059962	0.076969	0.089968	0.110972	0.135459	0.154723	0.189617	0.227212	0.268920	1	-3	-4	-4	0	-4	-3	-4	-3	2	4	-4	3	-1	-3	-3	-3	-4	-1	1	0	-3	-3	-4	1	-2	-1	-4
1	0.214738	0.199318	0.169202	0.124696	0.092502	0.067242	0.054818	0.048498	0.051828	0.050113	0.046055	0.038485	0.031487	0.025596	0.024992	0.028636	0.035709	0.047158	0.058947	0.064109	0.069281	-2	-1	-2	-2	-4	0	4	-5	4	0	0	-1	-2	-4	-4	-3	-3	-5	-3	4	2	2	1	2	-4	0	1	-2
1	0.349112	0.336961	0.347324	0.341069	0.350394	0.332647	0.356453	0.347488	0.405970	0.468699	0.536259	0.571939	0.591741	0.600289	0.596390	0.593521	0.576434	0.564054	0.524148	0.496699	0.463246	-3	-3	-3	-4	-4	-2	-3	-4	3	-2	-2	-3	-2	2	-4	-3	-3	1	8	-2	1	-1	-1	2	-4	4	5	-1
1	0.163357	0.145972	0.122211	0.094106	0.072113	0.055143	0.040128	0.030605	0.026346	0.021605	0.020424	0.021601	0.026233	0.033918	0.043818	0.060915	0.086317	0.109321	0.155288	0.209932	0.261140	0	-4	-3	-4	0	-3	-3	-3	-2	1	5	-4	4	-2	-2	-3	-3	-4	-1	1	0	-2	-3	-3	1	-3	-1	-3
1	0.604591	0.546017	0.483097	0.436281	0.370695	0.331616	0.297794	0.274494	0.258888	0.256119	0.253131	0.238871	0.233498	0.206803	0.184367	0.175474	0.178909	0.184813	0.205193	0.206517	0.209041	1	1	0	-1	-2	0	1	1	-1	-2	-1	1	-1	-2	1	0	-1	1	0	-2	0	2	0	0	-2	1	-1	0
1	0.548006	0.534476	0.492357	0.454906	0.433062	0.400536	0.388040	0.348892	0.322993	0.288461	0.273801	0.228543	0.211728	0.183037	0.148041	0.110903	0.101730	0.104340	0.131249	0.140396	0.158284	0	-1	-1	5	-5	0	2	2	-3	-5	-5	-2	-3	-5	2	-2	-2	0	-3	-2	-2	-1	-1	2	-4	0	2	4
1	0.156518	0.130183	0.101933	0.079002	0.058565	0.042438	0.027900	0.021879	0.020251	0.018996	0.019136	0.021605	0.027860	0.040388	0.050136	0.063764	0.077380	0.096496	0.129788	0.183729	0.240047	0	-3	-4	-4	1	-4	-3	-4	-3	1	5	-3	3	-2	-4	-3	-3	-4	-2	1	0	-3	-3	-2	2	-3	-1	-4
1	0.450055	0.456690	0.432065	0.417320	0.404711	0.406728	0.425010	0.439469	0.491779	0.534030	0.561632	0.581323	0.585336	0.578312	0.561671	0.533524	0.514020	0.487605	0.481259	0.483731	0.463280	-1	1	-1	0	-4	4	4	-2	0	-4	-3	3	-2	-4	-2	-1	-1	-3	-2	-3	-1	-1	-1	-2	7	5	0	-3
1	0.127545	0.108196	0.076469	0.051359	0.038972	0.027372	0.023654	0.021878	0.023704	0.021794	0.021336	0.019136	0.019315	0.018970	0.025716	0.034903	0.045002	0.054906	0.072649	0.078990	0.080923	2	3	0	0	-2	1	1	-2	0	-4	-3	3	-4	-4	-1	1	-1	-2	-4	-4	2	-1	-1	-3	0	1	-1	-3
1	0.147240	0.140752	0.132897	0.114059	0.098515	0.091221	0.082901	0.075056	0.066458	0.056710	0.041447	0.031534	0.025305	0.023088	0.023127	0.027590	0.027964	0.028705	0.043992	0.071308	0.106129	1	1	1	1	-4	1	0	-1	-3	-2	-1	0	0	-2	-4	0	3	-2	-3	-2	-1	1	-2	-2	-5	5	2	-2
1	0.104022	0.103454	0.106746	0.108199	0.103113	0.114989	0.139834	0.166122	0.205147	0.252579	0.287699	0.355685	0.415093	0.456869	0.514696	0.579788	0.642595	0.711609	0.777931	0.827784	0.837339	1	5	-1	-1	-1	1	0	-4	-3	-2	1	1	-2	-4	-4	-1	-2	-5	-1	-3	3	-5	-5	-5	2	-4	-3	-4
1	0.160661	0.125851	0.091773	0.067679	0.052301	0.043875	0.036679	0.037065	0.047643	0.055603	0.058243	0.063537	0.071902	0.093554	0.115089	0.161739	0.207733	0.267445	0.330335	0.378483	0.434249	2	-1	-2	3	-5	0	3	-1	-1	-4	-1	1	-2	-4	0	-1	0	-5	-3	-3	-2	-5	-6	-6	-2	-3	-5	-6
1	0.094698	0.068542	0.049301	0.032193	0.021380	0.016420	0.012837	0.010498	0.009854	0.008976	0.009193	0.011538	0.018170	0.025363	0.033327	0.043903	0.057103	0.071611	0.104022	0.152983	0.218729	2	1	-2	1	-4	0	3	-1	-2	-1	-2	1	-1	-4	1	0	0	-4	-4	-1	-2	-5	-5	-6	-1	-3	-5	-6
1	0.615910	0.603645	0.663201	0.632080	0.578148	0.504159	0.432254	0.370839	0.318537	0.250608	0.182177	0.139470	0.100756	0.105352	0.114078	0.129453	0.135139	0.121433	0.123502	0.122468	0.125955	1	2	1	2	-5	0	1	-1	0	-2	-2	1	0	-2	-4	2	0	-5	-1	-2	-1	1	1	-2	-5	3	2	-4
1	0.234511	0.224943	0.204599	0.168767	0.127646	0.110449	0.100523	0.093378	0.111704	0.145346	0.199680	0.240647	0.263482	0.278510	0.281637	0.268882	0.262027	0.273168	0.285728	0.309598	0.313333	1	2	0	0	-2	1	2	-2	-1	-2	-2	3	-1	-2	-3	-1	0	-4	-3	-2	1	2	-1	2	-3	1	3	-2
1	0.319157	0.304163	0.273898	0.225674	0.169718	0.127290	0.098234	0.073834	0.059217	0.046562	0.031308	0.019695	0.015413	0.015115	0.017886	0.028024	0.041702	0.060329	0.102858	0.144139	0.177036	2	1	0	0	-4	1	0	-2	-2	-2	-1	0	1	-1	-4	0	2	0	1	-2	-1	2	-2	-1	-5	4	2	-2
1	0.349933	0.288941	0.222909	0.157457	0.097486	0.050805	0.024822	0.012769	0.010038	0.008029	0.009920	0.014079	0.022465	0.030155	0.035089	0.039727	0.050147	0.059710	0.066082	0.070522	0.085048	0	0	0	1	-2	0	0	2	-2	-3	-3	-1	-3	-2	1	0	1	0	3	-2	-2	-2	1	3	-3	-2	-1	4
1	0.423833	0.412786	0.369908	0.284474	0.222907	0.175016	0.142382	0.136351	0.168356	0.204572	0.221353	0.237507	0.243309	0.221924	0.199712	0.208641	0.225155	0.250445	0.267854	0.274975	0.255984	1	-1	-1	5	-4	0	3	1	-3	-4	-4	-2	-2	-4	-1	-2	-3	0	-3	-3	-2	1	-1	2	-4	0	1	4
1	0.348269	0.323455	0.292188	0.251698	0.234633	0.202784	0.175344	0.140634	0.121610	0.102862	0.104959	0.110883	0.127259	0.137673	0.150239	0.149843	0.149586	0.157402	0.177865	0.185496	0.193097	1	-1	0	5	-5	-1	2	2	-4	-5	-5	-1	-3	-5	3	-2	-3	-1	-3	-1	-1	1	-1	2	-5	-1	2	4
1	0.096247	0.113643	0.115224	0.104413	0.091652	0.077063	0.061938	0.058879	0.064175	0.069599	0.071625	0.079657	0.095844	0.113484	0.145446	0.172835	0.224497	0.297773	0.409958	0.526204	0.641337	0	2	-1	1	-2	2	3	-3	0	-2	-3	1	0	-3	-2	-1	0	1	0	-2	0	1	1	-4	1	3	0	-3
1	0.294254	0.248318	0.196417	0.152698	0.112903	0.070634	0.051652	0.039531	0.036090	0.032916	0.030330	0.027029	0.027864	0.026808	0.028744	0.036990	0.051337	0.068122	0.105973	0.142059	0.175959	2	-2	-2	-1	-1	-1	0	-1	-2	0	2	-1	1	-2	0	-2	-1	-2	-2	0	0	-2	-2	-3	1	-2	-1	-2
1	0.317993	0.284346	0.238768	0.193069	0.157336	0.135083	0.120609	0.112523	0.108063	0.100073	0.105251	0.102099	0.110188	0.104844	0.105658	0.098518	0.105454	0.113639	0.135508	0.139349	0.149996	0	-1	-1	5	-5	0	2	2	-3	-5	-5	-1	-3	-5	2	-2	-3	-1	-3	-2	-1	1	0	2	-4	-1	1	4
1	0.183020	0.219952	0.282849	0.324107	0.343559	0.372339	0.380887	0.349327	0.329919	0.316444	0.249347	0.183622	0.138016	0.103594	0.071847	0.082862	0.097100	0.104872	0.100439	0.103019	0.098806	-1	1	3	4	-5	1	-2	-2	-2	-5	-4	1	2	-5	0	-1	3	-5	-1	-4	2	2	-1	-2	-5	-1	-2	0
2	0.198493	0.236941	0.280305	0.317338	0.329828	0.310559	0.310245	0.275115	0.232994	0.201082	0.176429	0.148248	0.139542	0.135841	0.128850	0.131762	0.136374	0.141200	0.134271	0.133225	0.129332	-2	-5	-5	-5	-1	-5	-5	-6	-5	6	2	-2	0	1	-5	-4	-3	1	-3	3	-3	0	1	-1	-4	-1	2	0
2	0.176429	0.148248	0.139542	0.135841	0.128850	0.131762	0.136374	0.141200	0.134271	0.133225	0.129332	0.129110	0.136721	0.162956	0.173537	0.184860	0.199117	0.189202	0.160227	0.137282	0.108751	-2	4	0	-3	1	0	-1	-4	0	-1	-1	5	0	-4	-3	-3	-3	-4	0	-1	5	-3	-3	-1	2	0	-1	-1
2	0.134271	0.133225	0.129332	0.129110	0.136721	0.162956	0.173537	0.184860	0.199117	0.189202	0.160227	0.137282	0.108751	0.087314	0.069058	0.071797	0.086471	0.106020	0.121481	0.135448	0.136205	1	-5	-4	-4	-4	-4	-4	4	-5	1	-2	-4	0	-4	-5	1	3	-5	0	1	-1	-4	0	3	3	-4	-1	2
2	0.137282	0.108751	0.087314	0.069058	0.071797	0.086471	0.106020	0.121481	0.135448	0.136205	0.127619	0.111732	0.099368	0.083552	0.076431	0.083414	0.120041	0.176882	0.221102	0.271019	0.333726	-1	3	0	-1	-5	-2	0	-2	1	-2	-3	5	0	-4	-4	-2	0	2	-4	-3	2	-4	-4	-4	0	-4	-4	-3
2	0.212696	0.171467	0.152598	0.130898	0.125749	0.127638	0.127618	0.125835	0.128980	0.115896	0.099894	0.084100	0.071239	0.055570	0.051844	0.049082	0.048285	0.053631	0.064528	0.089044	0.127144	-2	2	-2	-3	3	-4	-4	-5	-1	-2	4	0	-2	-1	-5	-3	3	-5	-2	-2	-2	-5	-1	-4	-5	-4	-5	7
2	0.464420	0.370204	0.313919	0.255863	0.232147	0.245672	0.246667	0.218829	0.212356	0.192119	0.175035	0.157082	0.140161	0.112525	0.091625	0.071587	0.065852	0.077502	0.112817	0.166095	0.241044	0	3	-3	5	-5	0	1	-2	-4	-2	-4	1	1	-6	-4	-1	-2	-6	-5	-2	-3	1	-5	-3	-1	-2	-3	-5
2	0.370204	0.313919	0.255863	0.232147	0.245672	0.246667	0.218829	0.212356	0.192119	0.175035	0.157082	0.140161	0.112525	0.091625	0.071587	0.065852	0.077502	0.112817	0.166095	0.241044	0.308819	-3	1	-5	-3	-1	-2	-3	-5	-1	5	2	-4	0	1	-3	-5	-1	-1	0	2	-1	-5	-5	-6	1	-5	-5	-6
2	0.112817	0.166095	0.241044	0.308819	0.369469	0.413373	0.444452	0.429809	0.390900	0.319578	0.242477	0.161999	0.106291	0.076201	0.066438	0.059403	0.055408	0.056077	0.063967	0.080960	0.099523	-3	-3	3	6	-1	1	-1	0	-3	-5	-5	-3	-4	2	-4	-2	-3	-4	-1	-5	0	4	-2	1	-1	-2	2	-1
2	0.069060	0.066484	0.066386	0.077675	0.085648	0.087816	0.094525	0.110861	0.113064	0.116587	0.114349	0.100719	0.078279	0.067561	0.057683	0.053028	0.057122	0.056393	0.061760	0.077390	0.111939	-1	-5	-6	-6	-4	-5	-5	-6	-5	4	3	-5	3	0	-5	-5	-2	-5	-4	4	2	2	-3	-4	0	-1	0	-4
2	0.440291	0.503911	0.551810	0.539516	0.552020	0.525745	0.483515	0.438300	0.423604	0.371570	0.341362	0.318718	0.287827	0.244854	0.192798	0.134632	0.090837	0.062501	0.044608	0.043559	0.045191	1	-1	0	0	-2	-1	0	2	-2	-1	0	0	0	-1	-1	1	0	-2	-2	-1	1	0	-2	2	-2	-1	-1	-1
2	0	0	0	0	0	0	0	0	0.864219	0.790912	0.741226	0.635194	0.533275	0.427228	0.350223	0.267720	0.212696	0.171467	0.152598	0.130898	0.125749	0	0	0	0	0	0	0	0	0	0	0	0	0	0	0	0	0	0	0	0	0	0	0	0	0	0	0	0
2	0.090837	0.062501	0.044608	0.043559	0.045191	0.051660	0.070384	0.087571	0.106534	0.122535	0.134501	0.135355	0.138250	0.154574	0.160316	0.164985	0.168468	0.157023	0.118075	0.087792	0.060183	-2	0	-1	0	-3	-2	-2	-2	7	-3	-2	-3	-3	2	-3	-2	-2	-2	6	-2	-3	-3	-3	-2	-3	-3	-3	-4
2	0.318494	0.259532	0.205312	0.165177	0.164282	0.183442	0.221284	0.287649	0.365683	0.390872	0.387458	0.345787	0.284377	0.201391	0.148963	0.101394	0.077523	0.063571	0.067928	0.074523	0.090679	1	1	3	1	-3	-1	1	-2	-2	0	-2	-1	-3	0	0	-1	-1	-3	1	-1	0	-3	-2	0	-3	0	0	-3
2	0.205312	0.165177	0.164282	0.183442	0.221284	0.287649	0.365683	0.390872	0.387458	0.345787	0.284377	0.201391	0.148963	0.101394	0.077523	0.063571	0.067928	0.074523	0.090679	0.101625	0.105648	2	0	1	2	-2	1	4	-3	-3	-4	-3	-1	-3	-2	-1	-1	-2	-4	-3	-3	2	-1	-1	2	-2	-2	0	-2
2	0.083817	0.077059	0.075847	0.073165	0.073085	0.092523	0.126615	0.171484	0.199758	0.210698	0.206345	0.186192	0.140416	0.102629	0.076891	0.049864	0.025973	0.016266	0.011758	0.010149	0.010370	-3	-2	4	2	-2	-2	1	-3	-1	-5	-5	-3	-4	-5	-4	3	4	-6	-4	-4	2	-1	-2	-4	-4	0	-1	-2
2	0.075847	0.073165	0.073085	0.092523	0.126615	0.171484	0.199758	0.210698	0.206345	0.186192	0.140416	0.102629	0.076891	0.049864	0.025973	0.016266	0.011758	0.010149	0.010370	0.012115	0.014557	3	-2	-3	1	-5	-2	5	1	-4	-3	-3	-2	-3	-5	-2	1	-1	-6	-5	-2	1	-1	-1	-3	-4	-1	-2	-1
2	0.016266	0.011758	0.010149	0.010370	0.012115	0.014557	0.022078	0.035124	0.054389	0.081963	0.116120	0.154838	0.194817	0.245291	0.284583	0.318997	0.331733	0.326733	0.288443	0.230018	0.175159	1	-5	-4	-5	5	-3	-4	-5	-4	3	-2	-4	-2	-4	-2	-2	-1	-5	-4	5	-3	4	5	4	-6	-1	-1	-3
2	0.010370	0.012115	0.014557	0.022078	0.035124	0.054389	0.081963	0.116120	0.154838	0.194817	0.245291	0.284583	0.318997	0.331733	0.326733	0.288443	0.230018	0.175159	0.127319	0.086648	0.062871	-1	-1	-2	-2	-2	-1	-1	-2	5	-1	2	-1	-2	3	-4	-2	-3	-1	5	-2	0	-4	-4	-4	-2	3	-3	-4
2	0.014557	0.022078	0.035124	0.054389	0.081963	0.116120	0.154838	0.194817	0.245291	0.284583	0.318997	0.331733	0.326733	0.288443	0.230018	0.175159	0.127319	0.086648	0.062871	0.056810	0.050163	0	-4	1	-3	1	-4	-4	-4	-3	3	0	-3	2	-1	-4	-2	-1	4	4	2	3	-5	-4	-4	-2	-4	-4	5
2	0.220284	0.274119	0.300712	0.291679	0.291204	0.273706	0.219260	0.206145	0.199101	0.172856	0.175041	0.217789	0.210430	0.179949	0.162443	0.132024	0.075073	0.052033	0.046148	0.041137	0.038365	-1	2	2	-1	-3	-1	-3	-2	4	0	-1	2	0	-3	-5	-1	2	-5	-1	1	0	-5	-4	-3	3	-4	-4	3
2	0.038365	0.040389	0.042178	0.045221	0.051859	0.059915	0.061402	0.068121	0.074336	0.079563	0.084009	0.094193	0.107384	0.113910	0.137019	0.178113	0.233014	0.269975	0.307631	0.335381	0.343451	1	0	-4	-5	-1	-2	-4	0	-4	1	2	1	3	0	-4	-2	-1	0	0	1	-1	1	-4	-5	-3	-4	-5	-4
2	0.038109	0.041169	0.039906	0.042164	0.045416	0.045804	0.046205	0.043038	0.040203	0.039006	0.039939	0.044244	0.051558	0.058645	0.061821	0.068984	0.075141	0.076152	0.073443	0.070222	0.061040	4	-1	-2	-4	4	-4	-4	2	-2	-3	-4	-1	-1	-5	-2	0	1	-4	-4	1	-2	6	-2	-2	-5	-1	-3	-5
2	0.039939	0.044244	0.051558	0.058645	0.061821	0.068984	0.075141	0.076152	0.073443	0.070222	0.061040	0.050392	0.043251	0.033440	0.025848	0.019896	0.013224	0.008440	0.006663	0.006116	0.004774	5	1	-4	-4	-4	-1	-1	1	-3	-3	-4	3	-3	-6	0	-1	-3	-4	-5	-3	0	3	-1	0	-6	0	4	2
2	0.051558	0.058645	0.061821	0.068984	0.075141	0.076152	0.073443	0.070222	0.061040	0.050392	0.043251	0.033440	0.025848	0.019896	0.013224	0.008440	0.006663	0.006116	0.004774	0.003995	0.003102	2	-4	-3	-3	-4	-3	3	2	-4	-5	-5	-3	-5	-6	-4	5	0	-6	-5	-3	0	-5	-6	-6	-3	-5	-5	-5
2	0.068984	0.075141	0.076152	0.073443	0.070222	0.061040	0.050392	0.043251	0.033440	0.025848	0.019896	0.013224	0.008440	0.006663	0.006116	0.004774	0.003995	0.003102	0.002802	0.003325	0.004800	1	-5	-6	-6	-2	-4	-5	-5	-5	2	4	-4	3	0	-4	-4	-2	-4	1	1	-2	-6	-6	-6	-4	-5	-6	-6
2	0.087626	0.095036	0.107672	0.121288	0.128388	0.125210	0.105933	0.093971	0.091567	0.090673	0.088379	0.082347	0.074848	0.065701	0.060966	0.052093	0.047992	0.042348	0.031984	0.022525	0.017815	1	-4	0	-4	-2	-3	-3	1	-3	-4	-4	-3	-2	-4	2	2	5	-5	-4	-3	-2	2	4	-1	-2	-1	-3	-4
2	0.095036	0.107672	0.121288	0.128388	0.125210	0.105933	0.093971	0.091567	0.090673	0.088379	0.082347	0.074848	0.065701	0.060966	0.052093	0.047992	0.042348	0.031984	0.022525	0.017815	0.013698	-2	2	4	-1	-2	-1	-3	-4	1	-2	2	-2	0	3	-3	-1	-3	-2	1	-1	3	-4	-3	-6	2	-5	-5	-2
2	0.074848	0.065701	0.060966	0.052093	0.047992	0.042348	0.031984	0.022525	0.017815	0.013698	0.010563	0.008531	0.006965	0.006814	0.006951	0.007541	0.009070	0.010646	0.012031	0.013672	0.016712	2	2	-1	2	-5	0	4	-3	-2	-4	-5	1	-3	-6	-4	0	-1	-1	-5	-3	-5	-3	1	8	-7	-3	-1	-4
2	0	0	0	0	0	0	0	0	0.567142	0.515387	0.450848	0.336122	0.247470	0.154635	0.093391	0.063462	0.052672	0.053886	0.078174	0.116255	0.161952	0	0	0	0	0	0	0	0	0	0	0	0	0	0	0	0	0	0	0	0	0	0	0	0	0	0	0	0
2	0.086974	0.087920	0.081275	0.067234	0.053498	0.035936	0.023475	0.024221	0.031190	0.053102	0.098860	0.187564	0.271628	0.341596	0.387761	0.395013	0.345663	0.301810	0.260573	0.229041	0.228084	1	1	-2	-1	-4	3	3	2	-2	-2	-3	0	-1	-3	-3	-1	0	-1	-2	-1	-2	1	-2	-2	-2	1	-1	-4
2	0.013672	0.016712	0.024223	0.039104	0.064862	0.102891	0.141102	0.182858	0.225214	0.236107	0.238486	0.227199	0.198349	0.155009	0.132728	0.106627	0.092473	0.082200	0.074485	0.065704	0.055648	-2	-4	-2	-4	-3	-3	-4	-4	-4	-2	-4	-3	-4	-5	-4	4	6	-6	-5	-2	-3	-4	-1	8	-6	-2	-1	-3
2	0.081275	0.067234	0.053498	0.035936	0.023475	0.024221	0.031190	0.053102	0.098860	0.187564	0.271628	0.341596	0.387761	0.395013	0.345663	0.301810	0.260573	0.229041	0.228084	0.237458	0.235076	3	0	-3	-4	0	0	-3	4	-3	-2	-2	-1	0	-2	-3	-2	1	-3	-2	0	-2	-3	1	7	-5	-3	0	-2
2	0.067234	0.053498	0.035936	0.023475	0.024221	0.031190	0.053102	0.098860	0.187564	0.271628	0.341596	0.387761	0.395013	0.345663	0.301810	0.260573	0.229041	0.228084	0.237458	0.235076	0.218086	-2	-3	1	7	-5	-3	0	-2	-1	-5	-6	-3	-5	-6	-4	1	-1	-2	-3	-4	-4	-6	-6	-6	-4	-5	-6	-6
2	0.022893	0.022965	0.024563	0.026766	0.030205	0.035427	0.037071	0.039986	0.051188	0.058711	0.061379	0.072810	0.078684	0.075012	0.083701	0.097947	0.096299	0.088710	0.077042	0.057333	0.033574	4	-4	-4	-5	-2	-3	-3	-3	-5	-3	3	-4	2	-1	-4	2	-1	-5	-3	-1	-3	-5	-6	-7	-4	-5	-6	-6
2	0.037071	0.039986	0.051188	0.058711	0.061379	0.072810	0.078684	0.075012	0.083701	0.097947	0.096299	0.088710	0.077042	0.057333	0.033574	0.019898	0.016008	0.015894	0.016554	0.020840	0.024583	-2	2	0	1	-5	1	3	-2	-2	-5	-4	3	-3	-5	-4	-1	4	-5	-4	-4	-2	-2	-5	-5	-4	-3	-2	-4
2	0.039986	0.051188	0.058711	0.061379	0.072810	0.078684	0.075012	0.083701	0.097947	0.096299	0.088710	0.077042	0.057333	0.033574	0.019898	0.016008	0.015894	0.016554	0.020840	0.024583	0.032097	-2	-2	-5	-5	-4	-3	-2	-4	3	-1	5	-3	3	1	-5	-4	-3	4	-2	-2	0	-5	-5	-5	-1	-5	-5	-4
2	0.023475	0.024221	0.031190	0.053102	0.098860	0.187564	0.271628	0.341596	0.387761	0.395013	0.345663	0.301810	0.260573	0.229041	0.228084	0.237458	0.235076	0.218086	0.189918	0.139179	0.087480	-3	-6	-6	-6	-1	-5	-6	-6	-6	6	1	-5	-1	-3	-6	-4	-2	-2	-4	4	1	1	-1	2	-5	0	4	-3
2	0.036782	0.042666	0.049236	0.058834	0.087724	0.113380	0.126619	0.135896	0.142871	0.123049	0.097320	0.078218	0.060023	0.038068	0.023750	0.016307	0.012240	0.009976	0.009837	0.008922	0.008875	-1	4	-2	0	-4	3	2	-3	-1	-1	-4	4	-4	-5	-4	-2	-2	-6	-4	-4	-1	0	-6	-6	2	-4	-5	-6
2	0.023750	0.016307	0.012240	0.009976	0.009837	0.008922	0.008875	0.010011	0.013677	0.017636	0.022595	0.029127	0.043397	0.073750	0.114287	0.169075	0.199701	0.226598	0.226318	0.205755	0.187290	0	-1	-1	3	-4	-1	0	-5	-2	-2	-3	0	-1	-1	5	-2	-2	-1	0	0	7	-4	-4	-5	-3	-4	-4	0
2	0.043397	0.073750	0.114287	0.169075	0.199701	0.226598	0.226318	0.205755	0.187290	0.184555	0.170851	0.167374	0.156793	0.131787	0.108535	0.086919	0.061761	0.048791	0.031519	0.022714	0.017293	-3	0	-5	-4	-5	-2	-1	-4	0	-2	-3	-2	-1	1	-6	-3	-2	11	4	-3	-2	-1	-3	-3	-4	0	1	-5
2	0.184555	0.170851	0.167374	0.156793	0.131787	0.108535	0.086919	0.061761	0.048791	0.031519	0.022714	0.017293	0.014956	0.012716	0.011604	0.009159	0.008576	0.007530	0.006677	0.006884	0.007789	-1	-4	-2	-3	-2	-3	-3	-2	-4	-5	-5	-3	-4	-5	-4	7	1	-5	1	-4	-2	3	-3	-4	-5	2	-2	-5
2	0.156793	0.131787	0.108535	0.086919	0.061761	0.048791	0.031519	0.022714	0.017293	0.014956	0.012716	0.011604	0.009159	0.008576	0.007530	0.006677	0.006884	0.007789	0.010259	0.016243	0.023331	-2	3	-1	-1	-1	0	-1	2	1	-3	-4	5	-4	-5	-3	-1	-2	-4	-3	-3	-4	-4	8	-2	-6	-3	-4	-4
2	0.108535	0.086919	0.061761	0.048791	0.031519	0.022714	0.017293	0.014956	0.012716	0.011604	0.009159	0.008576	0.007530	0.006677	0.006884	0.007789	0.010259	0.016243	0.023331	0.031128	0.047652	-2	-4	-1	-4	1	-3	-4	-4	-4	-4	-4	-3	-4	-5	-4	5	6	-6	-5	-3	-1	-5	-5	-5	-2	-4	-4	-4
2	0.017293	0.014956	0.012716	0.011604	0.009159	0.008576	0.007530	0.006677	0.006884	0.007789	0.010259	0.016243	0.023331	0.031128	0.047652	0.103856	0.197834	0.238088	0.299301	0	0	-2	2	-1	-1	-2	0	3	-4	-1	-4	-4	3	-2	-5	0	0	3	-3	-4	-3	-3	-5	-6	-6	1	-5	-6	-4
2	0.011604	0.009159	0.008576	0.007530	0.006677	0.006884	0.007789	0.010259	0.016243	0.023331	0.031128	0.047652	0.103856	0.197834	0.238088	0.299301	0	0	0	0	0	-1	-5	-3	-4	-4	-4	-5	7	-1	-6	-6	-4	-5	-6	-5	0	-3	1	-4	-5	-1	5	-3	-2	-3	1	-1	-4
2	0.006677	0.006884	0.007789	0.010259	0.016243	0.023331	0.031128	0.047652	0.103856	0.197834	0.238088	0.299301	0	0	0	0	0	0	0	0	0	2	1	-3	-3	1	0	-3	1	3	-3	0	0	4	-2	-5	-2	0	-2	4	-2	-3	-4	-3	-4	-4	-4	-4	-5
2	0.229041	0.228084	0.237458	0.235076	0.218086	0.189918	0.139179	0.087480	0.045600	0.025684	0.015802	0.008756	0.006475	0.004340	0.003338	0.003020	0.003073	0.003374	0.003416	0.003118	0.002846	2	-1	0	2	-4	0	2	-2	-2	-2	0	-1	-3	-2	1	2	1	-4	-3	-2	2	-2	-1	1	-2	-1	1	1
2	0	0	0	0	0.567142	0.515387	0.450848	0.336122	0.247470	0.154635	0.093391	0.063462	0.052672	0.053886	0.078174	0.116255	0.161952	0.188601	0.205229	0.187056	0.153442	0	0	0	0	0	0	0	0	0	0	0	0	0	0	0	0	0	0	0	0	0	0	0	0	0	0	0	0
2	0.006742	0.010580	0.015994	0.026555	0.035243	0.043697	0.057427	0.069534	0.094299	0.118620	0.129146	0.132767	0.135817	0.115653	0.090824	0.078315	0.063371	0.046101	0.035672	0.029023	0.022553	2	-5	-5	-6	2	-5	-5	-5	-6	-1	-3	-5	-3	-4	-5	-1	1	-6	-4	6	-3	1	-2	-4	-3	-1	-3	-5
2	0.172500	0.142997	0.131405	0.127520	0.139138	0.150163	0.165747	0.187085	0.220209	0.252150	0.279086	0.311880	0.345271	0.381640	0.402224	0.430432	0.446471	0.447983	0.432645	0.449799	0.440806	2	-2	-1	-2	-1	-1	-1	-1	-2	-1	-2	-1	-1	-3	-1	1	5	-3	-2	0	1	-1	0	-1	-1	0	0	-1
2	0.127520	0.139138	0.150163	0.165747	0.187085	0.220209	0.252150	0.279086	0.311880	0.345271	0.381640	0.402224	0.430432	0.446471	0.447983	0.432645	0.449799	0.440806	0.436144	0.408858	0.400830	2	-3	-3	-3	-1	-2	-2	-2	-3	2	0	-2	0	-2	-2	-1	0	-3	-2	4	0	-3	-1	-2	-3	-2	-3	6
2	0.430432	0.446471	0.447983	0.432645	0.449799	0.440806	0.436144	0.408858	0.400830	0.378316	0.383185	0.366226	0.377026	0.360811	0.388485	0.392364	0.405744	0.432282	0.452630	0.446311	0.460121	-2	-3	-4	-4	-2	-3	-3	-4	-3	1	5	-3	2	0	-3	-3	-2	-2	-1	1	-2	6	-1	-2	-4	1	0	-3
2	0.432282	0.452630	0.446311	0.460121	0.480805	0.465741	0.466877	0.461893	0.448020	0.428429	0.404742	0.396447	0.368887	0.346225	0.323116	0.280047	0.256251	0.218112	0.198339	0.178657	0.186290	0	-3	-1	-2	-3	-2	-3	6	-2	-4	-4	-2	-3	-4	-3	-1	-2	-3	-4	-4	-1	-3	-2	-2	-3	-2	-1	-3
2	0.684823	0.646383	0.583917	0.531800	0.490636	0.460120	0.447998	0.470550	0.503692	0.546369	0.591437	0.623285	0.627387	0.612959	0.577977	0.551619	0.505258	0.462647	0.425883	0.385052	0.322672	-3	-3	-3	-4	-3	-3	-3	-4	-1	-1	0	-3	0	6	-4	-3	-2	1	4	-1	-2	0	0	5	-4	2	1	-2
2	0.465741	0.466877	0.461893	0.448020	0.428429	0.404742	0.396447	0.368887	0.346225	0.323116	0.280047	0.256251	0.218112	0.198339	0.178657	0.186290	0.212529	0.276243	0.300774	0.342924	0.375951	-2	-3	-4	-4	-2	-3	-4	-4	-4	5	1	-3	1	0	-3	-3	-1	-3	-2	2	-1	0	-1	0	-3	5	3	-2
2	0.280047	0.256251	0.218112	0.198339	0.178657	0.186290	0.212529	0.276243	0.300774	0.342924	0.375951	0.385392	0.376948	0.393590	0.392617	0.407429	0.421309	0.428340	0.404655	0.381506	0.343556	-2	0	-2	-3	-3	-1	-1	-3	1	-2	-2	2	-1	2	-3	-2	-2	1	7	-2	-1	-2	0	3	-3	-2	-1	5
2	0.218112	0.198339	0.178657	0.186290	0.212529	0.276243	0.300774	0.342924	0.375951	0.385392	0.376948	0.393590	0.392617	0.407429	0.421309	0.428340	0.404655	0.381506	0.343556	0.304198	0.248217	-2	6	-1	-2	-4	1	0	-3	-1	-3	-3	2	-2	-3	-3	-1	-1	-3	-2	-3	-1	-3	-2	-2	-3	-2	-2	1
2	0.376948	0.393590	0.392617	0.407429	0.421309	0.428340	0.404655	0.381506	0.343556	0.304198	0.248217	0.226186	0.217600	0.185260	0.209677	0.224661	0.252711	0.262963	0.295773	0.325371	0.359366	-1	2	0	-1	-4	1	1	-2	-1	-3	-3	5	-2	-4	-1	-1	-1	-3	-2	-3	-1	-3	-4	-4	-1	-3	-3	-4
2	0.447998	0.470550	0.503692	0.546369	0.591437	0.623285	0.627387	0.612959	0.577977	0.551619	0.505258	0.462647	0.425883	0.385052	0.322672	0.293553	0.272574	0.245991	0.257899	0.252950	0.261397	-2	-2	0	5	-3	-1	0	-2	0	-3	-3	-1	-3	0	-2	-1	-2	-1	4	-3	-2	-2	-2	-4	-3	-2	-2	-4
2	0.368935	0.338884	0.313802	0.311915	0.285606	0.268136	0.265052	0.265071	0.262585	0.274184	0.293689	0.342727	0.375127	0.422005	0.477233	0.522269	0.537141	0.534112	0.531889	0.512561	0.492684	-2	6	-1	-2	-4	1	0	-3	-1	-3	-3	2	-2	-3	-3	-1	-1	-3	-2	-3	-3	-3	-4	-5	-3	-3	-3	-3
2	0.285606	0.268136	0.265052	0.265071	0.262585	0.274184	0.293689	0.342727	0.375127	0.422005	0.477233	0.522269	0.537141	0.534112	0.531889	0.512561	0.492684	0.464259	0.438061	0.385241	0.311328	-2	6	-1	-2	-4	1	0	-3	-1	-3	-3	2	-2	-3	-3	-1	-1	-3	-2	-3	2	-3	-3	-3	-2	-3	-3	-2
2	0.470550	0.503692	0.546369	0.591437	0.623285	0.627387	0.612959	0.577977	0.551619	0.505258	0.462647	0.425883	0.385052	0.322672	0.293553	0.272574	0.245991	0.257899	0.252950	0.261397	0.294823	-2	-2	-2	-4	-3	-2	-2	-4	1	-2	-1	-2	-1	3	-3	-2	-2	2	8	-2	-2	2	-2	-3	-2	-1	-2	-3
2	0.375127	0.422005	0.477233	0.522269	0.537141	0.534112	0.531889	0.512561	0.492684	0.464259	0.438061	0.385241	0.311328	0.233895	0.168287	0.129187	0.116841	0.115575	0.103915	0.104629	0.132338	-2	-3	-4	-4	-2	-3	-4	-4	-4	5	2	-3	1	0	-3	-3	-1	-3	-2	3	-2	-1	0	3	-3	0	2	-3
2	0.422005	0.477233	0.522269	0.537141	0.534112	0.531889	0.512561	0.492684	0.464259	0.438061	0.385241	0.311328	0.233895	0.168287	0.129187	0.116841	0.115575	0.103915	0.104629	0.132338	0.149468	-2	-1	0	3	-3	0	2	-3	4	-3	-3	-1	-2	1	-2	-1	-2	0	5	-3	-1	2	0	-1	-4	1	1	-2
2	0.302999	0.297242	0.302756	0.308467	0.316439	0.304969	0.285576	0.260299	0.242301	0.211178	0.191820	0.179764	0.162236	0.145856	0.129801	0.109425	0.099284	0.095153	0.087955	0.084758	0.083222	-2	6	-1	-2	-4	1	0	-3	-1	-3	-3	2	-2	-3	-3	-1	-1	-3	-2	-3	4	-2	-2	-3	-1	-1	-2	-1
2	0.352462	0.306098	0.250599	0.201400	0.161533	0.134773	0.118690	0.110227	0.120256	0.126160	0.128797	0.126167	0.128224	0.128116	0.142191	0.165788	0.197610	0.246021	0.290152	0.319351	0.341748	-2	-1	5	0	-3	-1	-1	-2	0	0	-2	-1	-1	0	-3	-1	-1	-1	4	-1	-2	-1	0	-1	-3	0	0	-2
2	0.319351	0.341748	0.351701	0.352966	0.354665	0.405334	0.474598	0.547901	0.616962	0.686673	0.705505	0.677078	0.619580	0.559648	0.483968	0.403691	0.316163	0.265893	0.226156	0.202050	0.183964	-2	0	0	-1	-3	3	0	-2	8	-4	-3	0	-2	-2	-2	-1	-2	-3	1	-3	-2	-3	-4	-4	-2	-3	-3	-4
2	0.405334	0.474598	0.547901	0.616962	0.686673	0.705505	0.677078	0.619580	0.559648	0.483968	0.403691	0.316163	0.265893	0.226156	0.202050	0.183964	0.179829	0.192929	0.216200	0.230689	0.273872	0	-1	0	-1	-1	-1	-1	-2	-2	-1	-2	-1	-1	-3	-1	1	5	-3	-2	0	2	-3	-3	-3	-1	-2	-2	-2
2	0.179829	0.192929	0.216200	0.230689	0.273872	0.328787	0.389854	0.455357	0.539429	0.607282	0.635430	0.644866	0.616425	0.572027	0.522255	0.439784	0.344787	0.256954	0.202427	0.185086	0.180878	-2	-2	3	-2	-3	-2	-2	-2	-1	-1	-1	-2	-1	6	-4	-2	-2	0	2	-2	2	-3	-3	-3	-1	-2	-2	-2
2	0.616425	0.572027	0.522255	0.439784	0.344787	0.256954	0.202427	0.185086	0.180878	0.188320	0.175126	0.157756	0.152242	0.180488	0.208445	0.256454	0.306966	0.393227	0.441688	0.466959	0.486273	-2	-2	1	7	-4	-1	1	-2	-1	-4	-4	-1	-4	-4	-2	-1	-1	-5	-4	-4	-2	5	-1	-1	-4	1	3	-3
2	0.256954	0.202427	0.185086	0.180878	0.188320	0.175126	0.157756	0.152242	0.180488	0.208445	0.256454	0.306966	0.393227	0.441688	0.466959	0.486273	0.503562	0.479482	0.448123	0.403383	0.385513	-2	-3	-4	-4	-2	-3	-4	-4	-3	4	1	-3	1	4	-3	-3	-1	-1	0	2	-2	-2	-1	-3	-3	-1	-2	-3
2	0	0	0	0	0	0	0	0.845868	0.816947	0.821964	0.756787	0.684823	0.646383	0.583917	0.531800	0.490636	0.460120	0.447998	0.470550	0.503692	0.546369	0	0	0	0	0	0	0	0	0	0	0	0	0	0	0	0	0	0	0	0	0	0	0	0	0	0	0	0
2	0.291248	0.282759	0.279075	0.296516	0.317172	0.356728	0.381924	0.404717	0.404440	0.382963	0.341720	0.314714	0.299289	0.265530	0.256970	0.271238	0.288732	0.329957	0.371665	0.423660	0.462724	-1	-2	-3	-3	-1	-2	-3	-3	-3	3	1	-2	4	-1	-3	-1	1	-3	-2	3	-1	1	0	-1	-3	6	2	-2
2	0.296516	0.317172	0.356728	0.381924	0.404717	0.404440	0.382963	0.341720	0.314714	0.299289	0.265530	0.256970	0.271238	0.288732	0.329957	0.371665	0.423660	0.462724	0.526284	0.572512	0.651522	-2	5	-1	-2	-3	0	-1	-3	-1	2	-1	1	-1	-2	-3	-2	-1	-3	-2	0	-2	-1	6	0	-3	-1	-1	-1
2	0.314714	0.299289	0.265530	0.256970	0.271238	0.288732	0.329957	0.371665	0.423660	0.462724	0.526284	0.572512	0.651522	0.730385	0.808603	0.859476	0.875719	0.881822	0	0	0	-2	-3	-3	-3	-2	-2	-3	-3	-3	-2	-2	-3	-2	0	-3	-1	2	10	1	-2	0	-1	0	-1	-2	0	0	-1
2	0.211622	0.247351	0.266456	0.271599	0.263996	0.234809	0.218756	0.220468	0.227304	0.227126	0.245789	0.245443	0.276586	0.287220	0.286845	0.273080	0.246551	0.199229	0.162075	0.138588	0.110963	-2	-1	1	6	-4	0	3	-2	-1	-4	-4	0	-3	-4	-2	-1	-1	-4	-3	-3	-1	-1	-1	-2	-3	3	-1	4
2	0.144256	0.117023	0.093997	0.083075	0.078193	0.084943	0.090739	0.099277	0.108083	0.119011	0.123541	0.143348	0.165117	0.191199	0.204503	0.229125	0.238929	0.241658	0.233317	0.234759	0.225036	5	-2	-2	-2	-1	-1	-1	0	-2	-2	-2	-1	-1	-3	-1	1	0	-3	-2	-1	1	-1	0	-1	-1	-1	-1	-1
2	0.083075	0.078193	0.084943	0.090739	0.099277	0.108083	0.119011	0.123541	0.143348	0.165117	0.191199	0.204503	0.229125	0.238929	0.241658	0.233317	0.234759	0.225036	0.213197	0.200066	0.189111	-2	-4	-4	-4	-2	-3	-4	-4	-4	6	1	-3	1	-1	-3	-3	-1	-3	-2	2	0	-3	-1	-2	-3	-2	-3	6
2	0.233317	0.234759	0.225036	0.213197	0.200066	0.189111	0.172433	0.185582	0.212101	0.231159	0.238395	0.261960	0.279511	0.286158	0.316746	0.328409	0.346346	0.368301	0.377060	0.365320	0.368044	-1	-1	-1	1	-4	2	6	-3	-1	-4	-3	0	-3	-4	-2	-1	-1	-3	-3	-3	-2	-2	1	7	-4	-1	1	-2
2	0.930986	0.921278	0.907130	0.892002	0.874492	0.854993	0.834862	0.816681	0.799941	0.791446	0.781014	0.765290	0.747868	0.711761	0.671626	0.626942	0.588638	0.556345	0.509983	0.462387	0.415735	1	-1	0	1	-1	0	1	-1	-1	-3	-3	0	-2	-3	-1	4	1	-3	-2	-2	-1	1	2	0	-3	5	2	-2
2	0.377060	0.365320	0.368044	0.398031	0.426113	0.431882	0.440681	0.463810	0.475426	0.471894	0.486313	0.479630	0.491196	0.478258	0.468871	0.448890	0.420417	0.432813	0.481641	0.511841	0.560809	0	-3	-1	-2	-3	-2	-3	6	-3	-4	-4	-2	-3	-4	-3	-1	-2	-3	-4	-4	-1	-3	-3	-4	-2	-3	-3	-4
2	0.479630	0.491196	0.478258	0.468871	0.448890	0.420417	0.432813	0.481641	0.511841	0.560809	0.587107	0.597053	0.601084	0.609619	0.599631	0.589965	0.576055	0.571743	0.552878	0.508645	0.486470	-3	-3	-3	-4	-3	-3	-4	-4	-1	-1	0	-3	-1	7	-4	-2	-3	1	4	-1	0	-3	-1	-2	-3	-2	-3	6
2	0.478258	0.468871	0.448890	0.420417	0.432813	0.481641	0.511841	0.560809	0.587107	0.597053	0.601084	0.609619	0.599631	0.589965	0.576055	0.571743	0.552878	0.508645	0.486470	0.475532	0.473812	-1	6	-1	-2	-4	0	-1	-3	-1	-2	-2	2	-2	-3	-3	-1	-1	-3	-2	-2	-1	-3	-3	-2	-3	-2	-2	-3
2	0.511841	0.560809	0.587107	0.597053	0.601084	0.609619	0.599631	0.589965	0.576055	0.571743	0.552878	0.508645	0.486470	0.475532	0.473812	0.452037	0.431195	0.391543	0.381611	0.376049	0.375336	0	-2	0	-2	-1	-1	-1	-2	-2	-1	-2	-1	-1	-3	-2	1	6	-3	-2	0	-1	-3	-3	-4	-1	-3	-3	-4
2	0.508645	0.486470	0.475532	0.473812	0.452037	0.431195	0.391543	0.381611	0.376049	0.375336	0.379286	0.362035	0.340899	0.334190	0.333477	0.386814	0.440190	0.476466	0.503419	0.513520	0.508626	-2	-1	7	1	-3	0	-1	-1	0	-4	-4	-1	-3	-4	-3	0	0	-4	-3	-3	-2	-2	-3	-4	-3	-2	-3	-4
2	0.169851	0.151004	0.145094	0.165180	0.178913	0.200749	0.236085	0.282570	0.325838	0.379294	0.424872	0.450456	0.455608	0.450331	0.434325	0.417587	0.399931	0.373244	0.352420	0.316519	0.277457	-2	6	-1	-2	-4	1	-1	-3	-1	-4	-3	2	-2	-3	-3	-1	-2	-3	-2	-3	-3	-3	-3	-4	-3	-3	-3	-4
2	0.379294	0.424872	0.450456	0.455608	0.450331	0.434325	0.417587	0.399931	0.373244	0.352420	0.316519	0.277457	0.230921	0.192011	0.164594	0.158734	0.149215	0.155333	0.164275	0.195959	0.222885	-2	-1	7	1	-3	0	-1	-1	0	-4	-4	-1	-3	-4	-3	0	0	-4	-3	-3	-2	6	-1	-2	-4	1	0	-3
2	0.259983	0.266234	0.264667	0.248531	0.239970	0.243857	0.252670	0.253785	0.255468	0.256537	0.228127	0.194150	0.159450	0.127692	0.092147	0.075934	0.070250	0.067009	0.066196	0.060031	0.054073	-1	-1	-1	1	-4	2	6	-2	-1	-4	-3	0	-3	-4	-2	-1	-1	-3	-3	-3	-2	-1	2	4	-4	1	4	-2
2	0.063938	0.072872	0.077812	0.089326	0.103879	0.115124	0.124098	0.139858	0.162499	0.168248	0.169073	0.177693	0.176964	0.162317	0.151930	0.143190	0.125691	0.125143	0.130211	0.137005	0.147042	-2	-3	-4	-4	-2	-3	-4	-4	-4	5	1	-3	2	-1	-3	-3	-1	-3	-2	3	0	-3	-1	-2	-3	-2	-3	6
2	0.711761	0.671626	0.626942	0.588638	0.556345	0.509983	0.462387	0.415735	0.374430	0.315271	0.282870	0.262321	0.226776	0.215533	0.213530	0.220679	0.230198	0.229290	0.214406	0.187711	0.163822	-2	6	-1	-2	-4	1	0	-3	-1	-4	-3	2	-2	-3	-3	-1	-2	-3	-2	-3	-2	-2	-3	-4	-3	-2	-3	-4
2	0.250442	0.316575	0.399747	0.486734	0.567019	0.637676	0.690077	0.723272	0.744528	0.725385	0.660005	0.568287	0.485268	0.377244	0.275224	0.193877	0.150005	0.110076	0.094485	0.089857	0.076932	-2	7	-1	-2	-4	1	-1	-3	-1	-4	-3	2	-2	-3	-3	-1	-2	-3	-2	-3	5	-2	-2	-2	-1	-1	-1	0
2	0.568287	0.485268	0.377244	0.275224	0.193877	0.150005	0.110076	0.094485	0.089857	0.076932	0.070170	0.070613	0.080900	0.090698	0.112754	0.144516	0.169435	0.203427	0.218578	0.224191	0.211350	-1	-2	4	0	-2	-1	-1	-2	-1	3	-1	-1	0	-2	-2	1	0	-4	-2	0	-2	-1	0	-1	-4	0	-1	-3
2	0.218578	0.224191	0.211350	0.203620	0.187894	0.183741	0.175778	0.170290	0.167079	0.150829	0.144740	0.139993	0.132149	0.116598	0.105369	0.091553	0.079983	0.078811	0.084089	0.083488	0.081140	-2	-2	1	7	-4	-1	1	-2	-2	-4	-4	-1	-4	-4	-2	-1	-2	-5	-4	-4	-2	-1	0	-2	-4	0	-1	-3
2	0.116598	0.105369	0.091553	0.079983	0.078811	0.084089	0.083488	0.081140	0.093122	0.103216	0.115590	0.132346	0.152460	0.170699	0.213253	0.251866	0.308890	0.349896	0.370459	0.347794	0.321256	0	-3	-1	-2	-3	-2	-3	6	-3	-4	-4	-2	-3	-4	-3	-1	-2	-3	-4	-4	-2	-2	1	7	-4	-1	1	-2
2	0.083488	0.081140	0.093122	0.103216	0.115590	0.132346	0.152460	0.170699	0.213253	0.251866	0.308890	0.349896	0.370459	0.347794	0.321256	0.286142	0.243147	0.201734	0.174276	0.145760	0.121123	-1	5	-1	-2	-4	2	0	-2	-1	-3	-3	4	-2	-4	-2	-1	-1	-3	-2	-3	0	-3	-1	-2	-3	-2	-3	6
2	0.121123	0.118639	0.128994	0.141046	0.146705	0.146874	0.151439	0.170635	0.199728	0.220302	0.239169	0.289980	0.305126	0.301976	0.329992	0.356557	0.347150	0.358350	0.355921	0.357640	0.362668	-3	-3	-4	-4	-3	-4	-4	-4	-2	-1	0	-4	0	7	-4	-3	-3	1	3	-1	-3	-3	-4	-4	-3	-4	-4	-4
2	0.262321	0.226776	0.215533	0.213530	0.220679	0.230198	0.229290	0.214406	0.187711	0.163822	0.138943	0.127790	0.119719	0.108278	0.098773	0.087413	0.073829	0.070054	0.077116	0.082053	0.091864	-1	-2	-3	-4	-2	-1	-3	-3	-2	1	2	-2	7	0	-3	-2	-1	-2	-1	0	0	-3	-1	-2	-3	-2	-3	6
2	0.334639	0.335364	0.340391	0.318001	0.315876	0.303983	0.282103	0.261893	0.258753	0.258819	0.256730	0.245848	0.238543	0.228833	0.212433	0.209672	0.187308	0.171095	0.169202	0.166322	0.167937	-1	0	0	1	-4	2	6	-3	-1	-4	-3	0	-2	-4	-1	0	-1	-3	-3	-3	0	-3	-1	-2	-3	-2	-3	6
2	0.228833	0.212433	0.209672	0.187308	0.171095	0.169202	0.166322	0.167937	0.166160	0.157372	0.162962	0.147569	0.149513	0.155417	0.173245	0.217182	0.261626	0.325355	0.405376	0.460348	0.501870	0	-3	-1	-2	-3	-2	-3	6	-3	-4	-4	-2	-3	-4	-3	-1	-2	-3	-4	-4	-1	-3	-3	-2	-3	-2	-2	-3
2	0	0	0	0.963781	0.956838	0.950379	0.945880	0.941021	0.937845	0.930986	0.921278	0.907130	0.892002	0.874492	0.854993	0.834862	0.816681	0.799941	0.791446	0.781014	0.765290	0	0	0	0	0	0	0	0	0	0	0	0	0	0	0	0	0	0	0	0	0	0	0	0	0	0	0	0
2	0.024573	0.029631	0.037091	0.051240	0.061717	0.076340	0.089837	0.110129	0.136240	0.152192	0.176232	0.221914	0.251452	0.270174	0.310190	0.328832	0.311314	0.300735	0.283918	0.245762	0.209153	-2	-3	-4	-4	-2	-3	-3	-4	-3	1	5	-3	2	0	-3	-3	-2	-2	-2	0	-2	-3	-4	-4	-2	-3	-3	-4
2	0.051240	0.061717	0.076340	0.089837	0.110129	0.136240	0.152192	0.176232	0.221914	0.251452	0.270174	0.310190	0.328832	0.311314	0.300735	0.283918	0.245762	0.209153	0.178481	0.137921	0.097112	5	-2	-2	-2	-1	-1	-1	0	-2	-2	-2	-1	-1	-3	-1	1	0	-3	-2	-1	0	-4	-3	-4	10	-3	-4	-3
2	0.215039	0.183974	0.161253	0.146347	0.131784	0.135074	0.140433	0.152481	0.176951	0.198510	0.210564	0.229298	0.255785	0.280089	0.303166	0.331339	0.356398	0.365855	0.368117	0.362770	0.363829	0	-1	0	-1	-1	-1	-1	-2	-2	-1	-1	-1	-1	-2	-1	1	5	-3	-2	0	1	-1	1	0	-1	0	0	0
2	0.826367	0.826012	0.829888	0.819450	0.794009	0.769494	0.742998	0.698024	0.659656	0.624728	0.571675	0.546335	0.518857	0.498383	0.483360	0.464645	0.432382	0.425954	0.424248	0.431084	0.423615	-1	1	0	0	-3	6	2	-2	0	-3	-2	1	0	-3	-1	0	-1	-2	-2	-2	0	-1	0	-1	-1	-1	-1	-2
2	0.368117	0.362770	0.363829	0.348911	0.344731	0.343782	0.336878	0.333023	0.352667	0.356287	0.348426	0.373786	0.414834	0.429837	0.455026	0.472666	0.473991	0.455053	0.446659	0.426168	0.423835	-1	0	0	2	-4	2	5	-2	0	-4	-3	1	-2	-4	-1	0	-1	-3	-2	-3	-2	-2	1	6	-4	0	2	-1
2	0.472666	0.473991	0.455053	0.446659	0.426168	0.423835	0.435701	0.472015	0.491463	0.508700	0.517168	0.515608	0.457854	0.423744	0.382332	0.353351	0.313172	0.293678	0.268728	0.251488	0.262492	-1	-2	-2	-2	-3	-1	-1	-2	-2	-3	-3	-1	-3	-4	8	-1	-1	-4	-3	-3	-1	-2	-2	-2	-3	-1	-1	-2
2	0.446659	0.426168	0.423835	0.435701	0.472015	0.491463	0.508700	0.517168	0.515608	0.457854	0.423744	0.382332	0.353351	0.313172	0.293678	0.268728	0.251488	0.262492	0.289290	0.323672	0.365134	0	-3	0	-1	-3	-2	-2	6	-2	-4	-4	-2	-3	-3	-2	0	-2	-3	-3	-3	-1	-3	-4	-3	-1	-3	-4	-4
2	0.382332	0.353351	0.313172	0.293678	0.268728	0.251488	0.262492	0.289290	0.323672	0.365134	0.398348	0.416787	0.427067	0.453441	0.465379	0.479929	0.498028	0.521562	0.507729	0.489234	0.462467	-2	-2	-2	-3	-3	-2	-2	-3	2	-1	-1	-2	-1	3	-3	-2	-2	2	7	-1	0	-3	0	-1	-3	-2	-2	6
2	0.313172	0.293678	0.268728	0.251488	0.262492	0.289290	0.323672	0.365134	0.398348	0.416787	0.427067	0.453441	0.465379	0.479929	0.498028	0.521562	0.507729	0.489234	0.462467	0.434706	0.403152	-2	6	-1	-2	-4	1	0	-3	0	-3	-2	2	-2	-3	-2	-1	-1	-3	-2	-3	-1	-2	-2	-2	-3	-1	-1	-2
2	0.794009	0.769494	0.742998	0.698024	0.659656	0.624728	0.571675	0.546335	0.518857	0.498383	0.483360	0.464645	0.432382	0.425954	0.424248	0.431084	0.423615	0.440326	0.454859	0.459648	0.463863	-1	2	0	-1	-3	1	1	-2	-1	-3	-3	5	-2	-3	-1	0	-1	-3	-2	-3	4	-2	-2	-2	0	-1	-1	0
2	0.323672	0.365134	0.398348	0.416787	0.427067	0.453441	0.465379	0.479929	0.498028	0.521562	0.507729	0.489234	0.462467	0.434706	0.403152	0.386963	0.369497	0.335959	0.329120	0.321946	0.334866	0	-1	0	-1	-1	-1	-1	-2	-2	-1	-1	-1	-1	-2	-1	1	5	-3	-2	0	-1	-3	-4	-3	-1	-3	-4	-4
2	0.698024	0.659656	0.624728	0.571675	0.546335	0.518857	0.498383	0.483360	0.464645	0.432382	0.425954	0.424248	0.431084	0.423615	0.440326	0.454859	0.459648	0.463863	0.467535	0.462418	0.448845	0	-3	-3	-3	-1	-2	-3	-3	-3	3	1	-3	1	-1	-3	-2	0	-3	-1	4	0	-3	0	-1	-3	-2	-2	6
2	0.182782	0.170409	0.172164	0.196870	0.207821	0.219283	0.259410	0.295712	0.322175	0.363390	0.416085	0.458591	0.483958	0.493945	0.510339	0.515574	0.531001	0.529404	0.550107	0.526534	0.507436	-2	6	-1	-2	-4	1	0	-3	0	-3	-2	2	-2	-3	-2	-1	-1	-3	-2	-3	-2	-3	-3	-4	-3	-3	-4	-3
2	0.363390	0.416085	0.458591	0.483958	0.493945	0.510339	0.515574	0.531001	0.529404	0.550107	0.526534	0.507436	0.450689	0.390229	0.328445	0.293263	0.268352	0.279564	0.291039	0.324520	0.358835	-2	-2	-3	-4	-3	-2	-3	-3	1	-1	-1	-2	-1	5	-3	-2	-2	2	6	-1	-1	2	0	-1	-3	1	1	-2
2	0.268352	0.279564	0.291039	0.324520	0.358835	0.388354	0.394272	0.395065	0.381156	0.344324	0.309652	0.310169	0.298735	0.287146	0.282715	0.286508	0.262270	0.245513	0.228711	0.206952	0.183605	4	-2	-2	-2	0	-1	-1	0	-2	-1	-2	-1	-1	-2	-1	1	0	-3	-2	0	0	-1	0	-1	-1	-1	-1	-2
2	0.176448	0.200033	0.230076	0.281847	0.344502	0.403830	0.469059	0.523941	0.566641	0.569969	0.535912	0.486933	0.437063	0.376025	0.317470	0.284177	0.263415	0.265508	0.264538	0.291676	0.317375	-2	6	-1	-2	-4	1	0	-3	0	-3	-2	2	-2	-3	-2	-1	-1	-3	-2	-3	4	-2	-2	-2	0	-1	-1	0
2	0.486933	0.437063	0.376025	0.317470	0.284177	0.263415	0.265508	0.264538	0.291676	0.317375	0.355462	0.390391	0.437986	0.477400	0.513417	0.538240	0.542836	0.541502	0.519054	0.480745	0.450266	-2	-1	6	1	-3	0	0	0	1	-4	-4	0	-2	-3	-2	1	0	-4	-2	-3	-2	0	1	-1	-3	0	0	-2
2	0.424248	0.431084	0.423615	0.440326	0.454859	0.459648	0.463863	0.467535	0.462418	0.448845	0.433860	0.417083	0.392714	0.357258	0.312902	0.272211	0.226049	0.192994	0.168409	0.168483	0.190409	-2	-2	-4	-4	-1	-2	-3	-4	-3	2	4	-3	2	0	-3	-3	-1	-2	-1	1	-1	-1	4	0	-2	0	-1	-1
2	0.519054	0.480745	0.450266	0.417510	0.392254	0.378185	0.379333	0.375390	0.379470	0.380457	0.385741	0.381642	0.381097	0.372766	0.356554	0.330105	0.300826	0.287003	0.256013	0.228098	0.204017	-2	-2	1	6	-4	0	2	-1	-1	-3	-4	-1	-3	-4	-2	0	-1	-5	-3	-3	-2	0	1	-1	-3	0	0	-2
2	0.382559	0.364860	0.342505	0.339255	0.315597	0.344620	0.363319	0.381118	0.396653	0.421311	0.435654	0.483282	0.504927	0.509608	0.547476	0.570468	0.562243	0.542801	0.531635	0.518256	0.486889	4	-2	-2	-2	0	-1	-1	0	-2	-1	-2	-1	-1	-2	-1	1	0	-3	-2	0	-2	-1	6	1	-3	0	0	0
2	0.466778	0.452710	0.427968	0.385877	0.343116	0.299258	0.281009	0.286226	0.259774	0.256841	0.244761	0.256639	0.256981	0.234358	0.207381	0.192065	0.153483	0.123652	0.117524	0.115565	0.103448	-1	0	0	2	-4	2	5	-2	0	-4	-3	1	-2	-4	-1	0	-1	-3	-2	-3	0	-3	0	-1	-3	-2	-2	6
2	0.234358	0.207381	0.192065	0.153483	0.123652	0.117524	0.115565	0.103448	0.104091	0.100582	0.101782	0.088483	0.092477	0.087957	0.083842	0.107153	0.149530	0.208189	0.314902	0.424242	0.533988	-1	-2	-2	-2	-3	-1	-1	-2	-2	-3	-3	-1	-3	-4	8	-1	-1	-4	-3	-3	-1	0	0	2	-4	2	5	-2
2	0.083842	0.107153	0.149530	0.208189	0.314902	0.424242	0.533988	0.661751	0.761581	0.787382	0.837190	0	0	0	0	0	0	0	0	0	0	-2	-3	-3	-4	-3	-3	-4	-3	-1	0	0	-3	0	7	-4	-3	-2	1	3	-1	-1	0	5	1	-3	1	3	-1
2	0	0	0	0.850877	0.831927	0.835486	0.826367	0.826012	0.829888	0.819450	0.794009	0.769494	0.742998	0.698024	0.659656	0.624728	0.571675	0.546335	0.518857	0.498383	0.483360	0	0	0	0	0	0	0	0	0	0	0	0	0	0	0	0	0	0	0	0	0	0	0	0	0	0	0	0
2	0.209419	0.224924	0.258919	0.319020	0.354250	0.420526	0.443116	0.440928	0.402969	0.376690	0.323162	0.290013	0.278541	0.292202	0.312674	0.341250	0.368645	0.371762	0.337068	0.329083	0.330345	0	-1	0	-1	-1	-1	-1	-2	-2	-1	-1	-1	-1	-2	-1	1	5	-3	-2	0	-2	-2	1	6	-4	0	2	-1
2	0.292202	0.312674	0.341250	0.368645	0.371762	0.337068	0.329083	0.330345	0.332416	0.356297	0.386848	0.353289	0.299700	0.231139	0.157144	0.093366	0.066589	0.066379	0.067521	0.075165	0.105775	0	-4	-3	-4	9	-3	-4	-3	-3	-1	-1	-3	-2	-3	-3	-1	-1	-3	-3	-1	-2	-2	-2	-3	-3	-2	-2	-3
2	0.391457	0.404862	0.416979	0.426083	0.416471	0.427386	0.437085	0.443026	0.410079	0.369855	0.321229	0.286364	0.240143	0.221649	0.231404	0.248142	0.259578	0.271794	0.261632	0.255944	0.252182	-2	-2	6	0	-3	-1	-1	-2	-1	-2	-3	-1	-2	-3	-3	0	-1	-4	-3	1	-2	0	-1	-2	-4	6	1	-3
2	0.915669	0.855064	0.781149	0.684827	0.568584	0.460093	0.373872	0.319431	0.333882	0.374525	0.439885	0.507465	0.559969	0.552669	0.498001	0.408040	0.312500	0.218666	0.147157	0.118888	0.094497	-1	0	-1	-1	-4	7	1	-2	0	-4	-3	1	-1	-4	-2	-1	-1	-3	-2	-3	1	-1	0	-1	-2	-1	-1	-1
2	0.299448	0.309130	0.289226	0.252554	0.223296	0.220625	0.207507	0.213038	0.241567	0.233813	0.233270	0.280010	0.318119	0.345940	0.389829	0.430579	0.426649	0.386297	0.325073	0.259245	0.179885	-1	-3	-1	-2	-3	-3	-3	7	-3	-5	-5	-2	-4	-4	-3	-1	-2	-3	-4	-4	-2	-3	-3	-2	-4	-2	-2	-3
2	0.325073	0.259245	0.179885	0.120845	0.093037	0.076406	0.077162	0.107557	0.125470	0.157600	0.178464	0.184326	0.184045	0.199462	0.199106	0.206158	0.216857	0.238071	0.227230	0.206234	0.190958	-2	-2	4	5	-4	-1	0	0	-1	-4	-4	-2	-3	-1	-3	-1	-2	-2	4	-3	-1	-3	-1	-2	-3	-3	-3	7
2	0.179885	0.120845	0.093037	0.076406	0.077162	0.107557	0.125470	0.157600	0.178464	0.184326	0.184045	0.199462	0.199106	0.206158	0.216857	0.238071	0.227230	0.206234	0.190958	0.167663	0.138883	-1	3	-1	-2	-4	-2	-2	6	-2	-5	-4	-1	-3	-4	-3	-1	-2	-3	-4	-4	-2	-3	-3	-4	-3	-2	-3	-4
2	0.125470	0.157600	0.178464	0.184326	0.184045	0.199462	0.199106	0.206158	0.216857	0.238071	0.227230	0.206234	0.190958	0.167663	0.138883	0.124289	0.113772	0.101586	0.088223	0.076628	0.085589	-2	-3	-3	-3	-2	-3	-3	-4	-4	5	0	-3	0	-1	-3	-2	2	-3	-2	2	-2	-4	-4	-4	-2	-4	-4	-5
2	0.328607	0.351206	0.385420	0.415259	0.430090	0.430638	0.409254	0.375653	0.344935	0.308056	0.277484	0.241930	0.215341	0.187674	0.152931	0.133452	0.111346	0.101787	0.105793	0.108718	0.105932	-2	4	-1	1	-4	0	-1	-3	-1	-3	-3	4	-2	1	-3	-1	-2	-2	3	-3	1	6	-1	-2	-4	0	-1	-3
2	0.468735	0.529132	0.569623	0.634650	0.653046	0.648897	0.654782	0.660824	0.676476	0.652378	0.624696	0.576465	0.514648	0.457182	0.398271	0.343134	0.302152	0.293900	0.278166	0.281714	0.307810	-1	-3	-1	-2	-3	-2	-3	6	-3	-3	-2	-2	4	-3	-3	-1	-2	-3	-3	-3	-2	-1	0	-2	-4	0	-1	-3
2	0.147157	0.118888	0.094497	0.078268	0.070052	0.066853	0.064329	0.069682	0.083912	0.105516	0.149563	0.205725	0.258552	0.306468	0.333320	0.327109	0.299962	0.288087	0.271801	0.253412	0.259010	-1	-3	-1	2	-4	-1	0	6	-2	-5	-4	-2	-4	-4	-3	-1	-2	-4	-4	-4	-2	4	2	-1	-3	1	0	-1
2	0.624696	0.576465	0.514648	0.457182	0.398271	0.343134	0.302152	0.293900	0.278166	0.281714	0.307810	0.334861	0.382160	0.419350	0.442735	0.470913	0.505480	0.520055	0.514881	0.512403	0.507189	-2	1	3	-1	-3	2	0	-2	-1	-2	-2	4	1	-3	2	-1	-1	-4	-3	-1	-2	6	-1	-2	-4	0	-1	-3
2	0.512403	0.507189	0.485834	0.455735	0.440572	0.429247	0.423220	0.434495	0.444937	0.463296	0.500021	0.525205	0.529233	0.514225	0.513881	0.486965	0.461196	0.427251	0.379239	0.327662	0.288037	-1	-3	-1	-2	-3	-2	-2	6	5	-5	-4	-2	-3	-3	-3	-1	-2	-3	-2	-4	-2	-4	-4	-4	-2	-3	-4	-5
2	0.094497	0.078268	0.070052	0.066853	0.064329	0.069682	0.083912	0.105516	0.149563	0.205725	0.258552	0.306468	0.333320	0.327109	0.299962	0.288087	0.271801	0.253412	0.259010	0.285313	0.299676	-3	-1	0	3	-4	0	0	-3	8	-4	-4	-2	-3	-2	-3	-2	-2	-3	1	-4	-2	-4	-4	-4	-2	-3	-4	-4
2	0.283281	0.273844	0.293848	0.306465	0.318215	0.313033	0.290353	0.262062	0.249288	0.249228	0.260364	0.275695	0.299598	0.297532	0.276872	0.260176	0.246659	0.209998	0.177472	0.165109	0.154525	-2	-3	-3	-3	-3	-2	-2	-3	0	2	-1	-2	-2	-3	7	-2	-2	-4	-3	-1	-1	-3	-3	-4	-3	-3	-3	-4
2	0.228188	0.250023	0.288366	0.316233	0.338929	0.372298	0.390980	0.375347	0.378311	0.375357	0.354254	0.347716	0.353744	0.339983	0.321772	0.303146	0.293322	0.273431	0.272718	0.273146	0.278416	3	-2	1	-2	-1	0	-1	-1	-2	1	-1	-1	-1	-2	-2	1	1	-3	-2	1	-2	-2	1	5	-3	-1	2	1
2	0.239363	0.208034	0.216252	0.203981	0.199841	0.228749	0.205330	0.201936	0.203299	0.206597	0.239800	0.270260	0.340366	0.397902	0.475396	0.552805	0.653219	0.716005	0.739236	0.759539	0.801640	-2	-2	0	6	-4	0	3	-2	-2	-4	-4	-1	-4	-4	-2	-1	-2	-5	-4	-4	5	-2	-3	-3	-1	-2	-2	0
2	0.104218	0.108173	0.115857	0.118765	0.128743	0.128195	0.129439	0.128662	0.122625	0.108654	0.106583	0.105172	0.091729	0.083294	0.083239	0.080059	0.078203	0.089289	0.106862	0.135220	0.196079	-2	-2	-3	-3	-3	-1	1	-4	1	-2	-2	-2	-2	2	-3	-2	-2	1	7	0	1	-2	-2	1	-3	0	4	-3
2	0.078203	0.089289	0.106862	0.135220	0.196079	0.263656	0.326007	0.385317	0.429087	0.416299	0.372044	0.330336	0.267445	0.211093	0.176344	0.157813	0.149556	0.150315	0.167217	0.203527	0.243949	0	-2	0	5	-4	0	3	-1	-2	-3	-2	-1	-3	-4	0	-1	-2	-4	-3	-3	-2	-3	-4	-5	-2	-3	-4	-5
2	0.029583	0.023153	0.020987	0.018261	0.015927	0.016984	0.018098	0.020730	0.026721	0.031652	0.043813	0.058969	0.073525	0.086885	0.097113	0.099535	0.097849	0.096570	0.096805	0.098197	0.113590	-2	-3	-2	-3	-4	-3	-3	-3	-4	-5	-5	-3	-4	-5	-3	7	-1	-5	-4	-4	1	-3	1	0	9	-2	-4	-4
2	0.018098	0.020730	0.026721	0.031652	0.043813	0.058969	0.073525	0.086885	0.097113	0.099535	0.097849	0.096570	0.096805	0.098197	0.113590	0.146547	0.177521	0.222260	0.282549	0.352137	0.429942	1	-1	-4	-3	-5	5	-1	-3	-1	-1	-3	-1	-1	-2	-5	-3	-3	-1	6	1	-1	1	0	2	-6	5	4	-4
2	0.073525	0.086885	0.097113	0.099535	0.097849	0.096570	0.096805	0.098197	0.113590	0.146547	0.177521	0.222260	0.282549	0.352137	0.429942	0.523284	0.616668	0.718565	0.755210	0.795439	0.776338	-3	-5	-6	-6	-3	-5	-6	-7	-6	5	4	-5	5	-3	-6	-5	-1	-5	-4	2	-3	-4	-3	-2	-6	-5	-4	7
2	0.086885	0.097113	0.099535	0.097849	0.096570	0.096805	0.098197	0.113590	0.146547	0.177521	0.222260	0.282549	0.352137	0.429942	0.523284	0.616668	0.718565	0.755210	0.795439	0.776338	0.743267	-3	-4	-3	-2	-6	-5	-4	7	-5	-7	-7	-3	-3	-6	-3	-2	-4	-6	-6	-6	1	-2	-2	-2	-5	1	0	-4
2	0.316108	0.326120	0.313489	0.261905	0.212731	0.167750	0.140763	0.139821	0.136315	0.149053	0.179402	0.239183	0.282093	0.334446	0.382856	0.405382	0.424004	0.455095	0.493317	0.503135	0.503295	0	-3	1	-1	-4	-3	-3	0	-4	-5	-5	-1	-1	-5	-4	5	4	-6	-5	-4	2	-4	-2	-4	0	-2	-4	-2
2	0.455095	0.493317	0.503135	0.503295	0.500044	0.470345	0.440905	0.433692	0.429064	0.421422	0.421124	0.394792	0.343025	0.297753	0.267354	0.219628	0.183101	0.171714	0.160310	0.138734	0.136634	-1	-4	1	0	-5	-1	-1	0	4	-2	-2	-1	-1	-5	6	-1	-2	-5	-4	-4	-1	-1	-5	-5	1	-4	-5	-5
2	0.183101	0.171714	0.160310	0.138734	0.136634	0.140146	0.159629	0.185679	0.215203	0.236335	0.239676	0.222156	0.194536	0.159193	0.123203	0.096400	0.073909	0.051568	0.037198	0.030221	0.026502	1	-1	-2	2	-5	0	4	-2	-1	-2	-5	0	-2	-1	-1	0	1	-6	-5	-2	2	-1	0	0	-5	2	3	-3
2	0.072843	0.102934	0.153953	0.211723	0.286725	0.338617	0.375464	0.387026	0.402639	0.374244	0.342069	0.293807	0.258981	0.220875	0.199832	0.198174	0.222314	0.234847	0.239626	0.280785	0.298693	-1	-2	-1	5	-5	3	4	-1	-3	-3	-2	0	-4	-4	-4	-1	-2	-6	-5	-4	-2	-1	2	3	0	-2	-2	1
2	0.476782	0.491448	0.466298	0.426675	0.422235	0.414335	0.377877	0.334709	0.326078	0.313538	0.287973	0.275582	0.258012	0.230715	0.205626	0.180669	0.165976	0.155250	0.157471	0.159391	0.172308	1	-2	-1	1	1	2	2	-2	-3	-3	-4	1	-2	-4	3	2	-1	-5	-4	-1	2	-1	1	0	-4	0	0	0
2	0.326078	0.313538	0.287973	0.275582	0.258012	0.230715	0.205626	0.180669	0.165976	0.155250	0.157471	0.159391	0.172308	0.184788	0.206671	0.223367	0.218697	0.221094	0.236413	0.244629	0.244993	-1	-2	-4	-3	-3	-3	-2	-4	-4	2	4	-2	-1	2	-4	-3	-2	7	0	0	1	2	2	1	-1	2	0	-1
2	0.217642	0.206020	0.212452	0.216901	0.232857	0.283135	0.319712	0.344292	0.392506	0.423707	0.427278	0.456943	0.508964	0.467734	0.430460	0.393096	0.335594	0.253146	0.204715	0.151955	0.099098	-1	0	1	1	-1	3	0	-3	-3	-2	0	3	-1	-2	-1	0	0	-4	-2	-2	1	-1	-3	-4	-1	-2	-2	-2
2	0.206020	0.212452	0.216901	0.232857	0.283135	0.319712	0.344292	0.392506	0.423707	0.427278	0.456943	0.508964	0.467734	0.430460	0.393096	0.335594	0.253146	0.204715	0.151955	0.099098	0.070153	1	-1	-3	-4	-1	-2	-2	-2	-3	0	-1	2	-1	0	1	-1	0	4	3	1	-2	-3	0	-2	-4	-1	-3	-5
2	0.069858	0.059274	0.056910	0.055753	0.060727	0.063284	0.068437	0.066443	0.075468	0.085229	0.096676	0.106692	0.132074	0.142212	0.141048	0.154631	0.165769	0.175440	0.183247	0.193440	0.175385	3	-4	-2	-5	3	-3	-4	-3	-5	1	4	-3	0	-3	-4	-3	-2	-4	-3	1	-3	-4	1	-4	-4	-1	-4	-5
2	0.137695	0.103676	0.081024	0.058917	0.045238	0.039583	0.034582	0.034101	0.045638	0.056552	0.063940	0.074819	0.100247	0.107905	0.116066	0.122373	0.120131	0.096419	0.082220	0.068131	0.057494	1	2	-2	3	-5	2	3	1	-2	-5	-5	2	-4	-5	-3	0	-3	-4	-4	-4	5	-3	-2	-3	2	-3	-3	-1
2	0.122174	0.098441	0.091055	0.088615	0.093758	0.101847	0.110110	0.116535	0.120153	0.117438	0.111349	0.118820	0.136861	0.157220	0.190348	0.234450	0.246035	0.240432	0.234556	0.209171	0.164769	-4	-4	-6	-6	-3	-4	-5	-6	-4	1	6	-5	3	-1	-5	-5	-3	-4	-3	0	-2	-2	-1	3	-3	-3	-1	-1
2	0.157220	0.190348	0.234450	0.246035	0.240432	0.234556	0.209171	0.164769	0.144444	0.125101	0.113361	0.112808	0.121311	0.124715	0.123306	0.127444	0.130229	0.129361	0.149988	0.172603	0.207362	-2	-1	-1	2	-6	3	7	-4	-1	-5	-5	-1	-4	-6	-3	-2	-3	-5	-4	-4	-3	-2	-2	1	-5	0	7	-4
2	0.234556	0.209171	0.164769	0.144444	0.125101	0.113361	0.112808	0.121311	0.124715	0.123306	0.127444	0.130229	0.129361	0.149988	0.172603	0.207362	0.234608	0.270822	0.268511	0.261281	0.226049	-2	-1	1	3	-5	0	5	-4	1	-5	-5	1	-3	-4	-1	-1	1	-5	-4	-3	-4	-5	-5	1	-4	-4	-4	-6
2	0.058917	0.045238	0.039583	0.034582	0.034101	0.045638	0.056552	0.063940	0.074819	0.100247	0.107905	0.116066	0.122373	0.120131	0.096419	0.082220	0.068131	0.057494	0.050312	0.048315	0.045767	-4	-4	-6	-6	-4	-4	-5	-6	-5	-1	6	-5	0	-2	-5	-5	-3	-4	-3	-1	0	-2	6	4	-5	-1	-2	-1
2	0.074258	0.075955	0.069672	0.069932	0.075891	0.073664	0.096258	0.129016	0.178421	0.219922	0.269606	0.330892	0.399421	0.462978	0.540503	0.600652	0.619901	0.636754	0.644264	0.625748	0.619525	-2	-5	-6	-6	-4	-5	-6	-6	-6	1	5	-5	4	0	-6	-5	-4	-5	-4	3	-4	-3	8	3	-6	-3	-3	-3
2	0.096258	0.129016	0.178421	0.219922	0.269606	0.330892	0.399421	0.462978	0.540503	0.600652	0.619901	0.636754	0.644264	0.625748	0.619525	0.651091	0.639324	0.619975	0.624687	0.588326	0.544887	-1	0	-1	-1	-5	1	3	-3	-1	-2	-3	-1	-1	-1	2	2	2	-5	-2	0	-2	-5	-6	-6	1	-3	-5	-6
2	0.462978	0.540503	0.600652	0.619901	0.636754	0.644264	0.625748	0.619525	0.651091	0.639324	0.619975	0.624687	0.588326	0.544887	0.497327	0.448945	0.387186	0.346628	0.333215	0.309636	0.289615	0	-2	3	-1	-5	2	1	-2	2	-5	-2	0	-2	-5	-3	4	0	-6	-4	-2	4	-3	-4	-4	-1	-1	-4	0
2	0.619901	0.636754	0.644264	0.625748	0.619525	0.651091	0.639324	0.619975	0.624687	0.588326	0.544887	0.497327	0.448945	0.387186	0.346628	0.333215	0.309636	0.289615	0.271496	0.264649	0.259434	2	-1	-3	-1	-4	-1	-2	0	-4	0	-3	1	-2	-5	-1	2	1	-6	-5	2	1	-3	0	3	-5	0	3	-1
2	0.625748	0.619525	0.651091	0.639324	0.619975	0.624687	0.588326	0.544887	0.497327	0.448945	0.387186	0.346628	0.333215	0.309636	0.289615	0.271496	0.264649	0.259434	0.243603	0.246559	0.245211	2	-1	0	-1	-4	1	-1	-3	2	0	-2	1	-3	-4	1	0	2	-6	-4	2	3	0	-3	-4	-4	1	0	0
2	0.387186	0.346628	0.333215	0.309636	0.289615	0.271496	0.264649	0.259434	0.243603	0.246559	0.245211	0.246052	0.230988	0.226479	0.255187	0.251436	0.235920	0.220983	0.219822	0.220589	0.215736	0	-2	-3	0	-5	-2	0	-3	-4	-2	-4	2	-4	-4	7	0	-2	-6	-5	-3	-1	-1	3	0	-2	-2	-1	4
2	0.271496	0.264649	0.259434	0.243603	0.246559	0.245211	0.246052	0.230988	0.226479	0.255187	0.251436	0.235920	0.220983	0.219822	0.220589	0.215736	0.233443	0.233776	0.242041	0.244855	0.227753	6	-4	-3	-4	0	-3	-3	-2	-4	-4	-4	-3	-1	-4	-3	2	-1	-5	-4	-2	-2	-4	-2	-3	-5	-2	-3	-3
2	0.246052	0.230988	0.226479	0.255187	0.251436	0.235920	0.220983	0.219822	0.220589	0.215736	0.233443	0.233776	0.242041	0.244855	0.227753	0.205403	0.202335	0.192129	0.186582	0.180001	0.167294	-3	-5	-5	-6	-3	-5	-5	-6	-5	4	2	-5	-1	-1	-5	-4	-2	-5	-3	6	0	-4	-4	-4	-2	-3	-4	-2
2	0.255187	0.251436	0.235920	0.220983	0.219822	0.220589	0.215736	0.233443	0.233776	0.242041	0.244855	0.227753	0.205403	0.202335	0.192129	0.186582	0.180001	0.167294	0.192745	0.186260	0.194966	-2	-5	-5	-5	-3	-4	-5	-6	-5	4	1	-5	2	-1	-2	-4	-2	-5	-2	5	1	3	1	-4	-2	-1	-3	-1
2	0.227753	0.205403	0.202335	0.192129	0.186582	0.180001	0.167294	0.192745	0.186260	0.194966	0.218488	0.223420	0.252634	0.237418	0.281827	0.280355	0.277664	0.274979	0.283292	0.284560	0.292278	-2	-4	2	-2	-5	-3	-4	7	-4	-6	-6	-2	-5	-5	-4	-2	-3	-5	-5	-5	-1	-2	-1	6	-5	4	2	-3
2	0.280355	0.277664	0.274979	0.283292	0.284560	0.292278	0.297187	0.295804	0.285877	0.273225	0.274124	0.270049	0.287692	0.297988	0.295109	0.286852	0.285462	0.277261	0.292059	0.289920	0.329598	-3	-5	-5	-5	-3	-5	-5	-6	-5	6	1	-5	0	-2	-5	-4	-2	-5	-3	5	0	-1	-1	-3	-1	2	-2	-3
2	0.292278	0.297187	0.295804	0.285877	0.273225	0.274124	0.270049	0.287692	0.297988	0.295109	0.286852	0.285462	0.277261	0.292059	0.289920	0.329598	0.334521	0.373055	0.374758	0.405787	0.384915	2	-3	2	5	-4	-2	0	-1	0	-5	-5	-2	-4	-5	-2	2	-1	-6	-4	-4	1	-4	-3	-3	0	-4	-4	7
2	0.049822	0.061922	0.090058	0.119254	0.140952	0.137900	0.152573	0.162729	0.180428	0.207780	0.223381	0.275326	0.307569	0.338463	0.361773	0.368883	0.345413	0.307657	0.271794	0.228635	0.212840	-5	-5	-5	-6	-5	-6	-6	-6	-4	-2	-1	-5	-2	9	-6	-5	-4	2	1	-3	-3	-5	-6	-6	-3	-5	-5	-6
2	0.140952	0.137900	0.152573	0.162729	0.180428	0.207780	0.223381	0.275326	0.307569	0.338463	0.361773	0.368883	0.345413	0.307657	0.271794	0.228635	0.212840	0.199970	0.187846	0.201840	0.224535	-2	1	0	0	-3	-2	-1	-3	0	-4	-3	2	-4	-5	2	4	3	-5	-4	-4	3	-4	-4	-3	-4	-3	-2	-2
2	0.247125	0.189352	0.151616	0.120903	0.099624	0.102582	0.096209	0.096886	0.094993	0.102451	0.098189	0.091385	0.105301	0.114973	0.128737	0.155748	0.180407	0.222728	0.253576	0.286849	0.289160	6	-4	-4	-4	3	-3	-3	-1	-4	-2	-4	-3	-3	-4	-3	0	1	-5	-4	0	1	1	1	3	-5	0	3	-2
2	0.220675	0.170747	0.122337	0.095181	0.069276	0.055921	0.043315	0.042810	0.046441	0.048500	0.049795	0.052950	0.050579	0.045642	0.039086	0.033950	0.028027	0.025120	0.022937	0.023425	0.024723	6	0	-2	-4	0	-3	-3	-1	-3	-4	-4	-3	-3	-1	-3	1	-2	-4	-2	-3	-4	-5	-5	-6	-4	-5	-5	-5
2	0.069276	0.055921	0.043315	0.042810	0.046441	0.048500	0.049795	0.052950	0.050579	0.045642	0.039086	0.033950	0.028027	0.025120	0.022937	0.023425	0.024723	0.028328	0.027292	0.025819	0.026664	-1	-3	-1	4	-5	-3	-2	5	-4	-5	-5	-3	-5	-5	4	0	-3	-5	-5	-5	1	0	1	2	-4	-2	3	1
2	0.095703	0.116038	0.134137	0.156697	0.171236	0.179869	0.173752	0.166046	0.161242	0.149753	0.153964	0.165061	0.180587	0.174632	0.176263	0.163280	0.153876	0.154952	0.172618	0.205105	0.234612	-3	8	-2	-3	-5	-1	-2	-4	-2	-4	-4	0	-3	-4	-4	-3	-3	-4	-3	-1	-3	-3	-1	7	-5	-2	2	-3
2	0.276570	0.240716	0.194683	0.149925	0.134276	0.119216	0.115767	0.117599	0.120488	0.110698	0.101543	0.099423	0.091964	0.090738	0.091088	0.088940	0.078334	0.072162	0.062636	0.047130	0.038563	-2	-2	-4	-4	-3	2	-3	-3	-4	1	4	-1	1	-2	-4	-3	2	-4	-3	2	-3	8	-2	-3	-5	-1	-2	-4
2	0	0	0	0	0	0	0	0	0.835643	0.836452	0.840387	0.847327	0.840397	0.835158	0.824495	0.812228	0.801192	0.793402	0.789593	0.787376	0.789047	0	0	0	0	0	0	0	0	0	0	0	0	0	0	0	0	0	0	0	0	0	0	0	0	0	0	0	0
2	0.149925	0.134276	0.119216	0.115767	0.117599	0.120488	0.110698	0.101543	0.099423	0.091964	0.090738	0.091088	0.088940	0.078334	0.072162	0.062636	0.047130	0.038563	0.036618	0.036945	0.040611	2	3	0	-1	-4	1	2	-2	-1	-4	-3	3	-3	-4	-3	-1	-1	-4	-1	-3	-3	-4	-4	-5	-3	-3	-4	-5
2	0.036945	0.040611	0.042981	0.041829	0.039302	0.035739	0.029324	0.029582	0.029448	0.032202	0.036827	0.042591	0.051867	0.057495	0.056431	0.052951	0.050362	0.045124	0.043427	0.044712	0.053328	-2	-3	-2	-3	-3	-3	-3	-4	-4	-1	-3	-3	-3	-4	-3	1	7	-5	-4	-2	0	-5	-5	-5	-3	-4	-5	-5
2	0.795352	0.798069	0.789332	0.769469	0.757015	0.739190	0.720880	0.691388	0.675825	0.642429	0.587735	0.534963	0.471567	0.404685	0.363284	0.311264	0.257287	0.260140	0.206162	0.198180	0.207173	3	-3	-3	-1	-3	-1	1	-2	-1	0	1	-2	-2	-3	3	0	0	-1	-3	-1	1	2	-2	0	-1	-2	0	-1
2	0.769469	0.757015	0.739190	0.720880	0.691388	0.675825	0.642429	0.587735	0.534963	0.471567	0.404685	0.363284	0.311264	0.257287	0.260140	0.206162	0.198180	0.207173	0.187073	0.187561	0.150405	0	-1	4	0	-3	1	-1	-1	-2	-3	-2	0	-2	-2	-3	3	1	-4	-2	-1	0	-2	-1	-1	-2	-2	0	-3
2	0.757015	0.739190	0.720880	0.691388	0.675825	0.642429	0.587735	0.534963	0.471567	0.404685	0.363284	0.311264	0.257287	0.260140	0.206162	0.198180	0.207173	0.187073	0.187561	0.150405	0.130586	0	-2	-1	-1	-2	-2	0	-3	2	3	-1	0	0	-2	-3	2	1	-3	-2	2	0	4	-2	-2	-3	2	1	-1
2	0.086432	0.082917	0.069351	0.058195	0.047656	0.035922	0.025270	0.021188	0.019388	0.019834	0.023858	0.034339	0.041638	0.051135	0.072258	0.094437	0.112810	0.146139	0.177633	0.193121	0.200990	-3	-5	-5	-6	-4	-5	-5	-6	-5	6	-1	-5	-1	1	-4	-4	-3	-5	-3	4	-2	-4	-3	-4	-4	-2	-3	0
2	0.025270	0.021188	0.019388	0.019834	0.023858	0.034339	0.041638	0.051135	0.072258	0.094437	0.112810	0.146139	0.177633	0.193121	0.200990	0.220231	0.207655	0.183629	0.159669	0.145121	0.114303	-1	-3	-2	-3	-3	-3	-3	-3	-3	-4	-4	-3	2	-5	1	6	-1	-5	-4	-4	-1	-4	-5	-5	-4	-3	-5	-1
2	0.072258	0.094437	0.112810	0.146139	0.177633	0.193121	0.200990	0.220231	0.207655	0.183629	0.159669	0.145121	0.114303	0.099473	0.095338	0.094597	0.088132	0.082435	0.079311	0.076057	0.074279	-1	1	-2	-5	1	-2	-4	-4	6	-4	-3	-1	-3	0	-5	-1	-1	9	4	-4	4	0	-3	-1	-4	-3	-2	5
2	0.095338	0.094597	0.088132	0.082435	0.079311	0.076057	0.074279	0.077181	0.081008	0.084126	0.087425	0.085139	0.081518	0.072048	0.066681	0.060836	0.057392	0.055594	0.062452	0.065946	0.071065	6	-4	-2	-4	1	-3	-3	-2	-4	-4	-4	-3	-2	-4	-4	1	0	-5	-4	-1	-4	-1	-6	-6	-4	-5	-5	-6
2	0.407366	0.445407	0.506714	0.555291	0.599736	0.649569	0.668199	0.642992	0.589345	0.497684	0.384886	0.282645	0.192800	0.134642	0.085985	0.062910	0.065199	0.077007	0.099591	0.123130	0.166978	-1	-1	2	3	-2	3	1	-4	0	-2	-2	2	-3	-1	-4	-1	0	-5	-4	-1	0	-2	-2	-3	-4	0	-4	-4
2	0.166978	0.212286	0.277163	0.325815	0.381139	0.427698	0.464465	0.528274	0.574283	0.636405	0.684809	0.756329	0.761884	0.797218	0.812111	0.813274	0.792258	0.762948	0.743491	0.710629	0.670803	1	-4	-5	-5	-3	-4	-4	-4	-5	2	-1	-4	-2	0	-4	-3	-1	-5	-3	6	-1	-1	8	0	-4	-2	-2	-3
2	0.171064	0.184215	0.203291	0.209260	0.227303	0.227756	0.223901	0.231937	0.250931	0.272201	0.273484	0.270783	0.244592	0.200974	0.150280	0.119113	0.094018	0.077577	0.073227	0.067511	0.066982	-3	-4	-3	-5	-3	-3	-4	-5	-4	0	5	-4	4	2	-4	1	-2	-3	-2	-1	6	-3	-3	-3	-2	-3	-3	2
2	0.184215	0.203291	0.209260	0.227303	0.227756	0.223901	0.231937	0.250931	0.272201	0.273484	0.270783	0.244592	0.200974	0.150280	0.119113	0.094018	0.077577	0.073227	0.067511	0.066982	0.065758	6	-3	-3	-3	-2	-3	-3	2	-3	-3	-3	-2	-3	-4	-3	0	-2	-4	-4	-2	-2	-3	3	-2	-3	-2	-2	-3
2	0.244592	0.200974	0.150280	0.119113	0.094018	0.077577	0.073227	0.067511	0.066982	0.065758	0.064389	0.063203	0.060998	0.056745	0.048834	0.040804	0.030746	0.023824	0.018945	0.017333	0.016175	1	-4	-4	-5	-2	-4	-4	-4	-5	6	-1	-4	0	-2	-4	-2	-2	-4	-3	3	6	-3	-3	-3	-2	-3	-3	2
2	0.111905	0.116018	0.125672	0.123943	0.113985	0.099868	0.092074	0.079030	0.071661	0.065157	0.063499	0.067862	0.082564	0.099827	0.112959	0.120760	0.117193	0.109780	0.100461	0.088087	0.078298	-3	-3	1	-4	-4	-3	-4	-5	0	-3	-3	-4	-3	1	-5	-3	-3	0	9	0	-1	-2	-2	-3	3	-1	-2	-3
2	0.092074	0.079030	0.071661	0.065157	0.063499	0.067862	0.082564	0.099827	0.112959	0.120760	0.117193	0.109780	0.100461	0.088087	0.078298	0.064639	0.053092	0.041453	0.034619	0.031764	0.031283	-3	-2	8	2	-5	-1	0	-3	-1	-5	-5	-2	-4	-5	-4	-1	-1	-6	-4	-4	1	-4	-5	-5	-3	-4	-4	0
2	0.080083	0.116207	0.169012	0.248827	0.334610	0.419331	0.449476	0.479473	0.466022	0.411791	0.346518	0.283239	0.239073	0.169160	0.126233	0.101638	0.087980	0.079773	0.091438	0.120973	0.160734	-1	-3	-2	-3	-3	-2	-2	-3	-3	1	-3	-2	-2	-4	-3	3	6	-4	-3	-2	-1	-3	-2	-3	-4	-3	-3	6
2	0.055263	0.055526	0.056365	0.051626	0.046904	0.042101	0.034715	0.039072	0.042383	0.048192	0.058931	0.066832	0.066777	0.064989	0.063170	0.059475	0.060395	0.067493	0.079071	0.103219	0.126298	-3	-4	-5	-5	-3	-4	-5	-5	-5	3	5	-4	0	-1	-5	-4	-3	-4	-3	-1	4	-4	-3	-3	4	-3	-3	5
2	0.106326	0.127348	0.144732	0.155181	0.167585	0.168486	0.159539	0.149012	0.143361	0.127235	0.119119	0.110713	0.103175	0.095331	0.089036	0.082703	0.081764	0.085478	0.088435	0.099234	0.120018	-2	-1	-1	1	-5	0	5	-4	3	-4	-4	1	-3	-3	0	-2	2	-1	2	-3	4	-3	-3	-2	-4	1	5	-3
2	0.200994	0.232845	0.283002	0.302098	0.305477	0.333499	0.364668	0.389567	0.403494	0.433606	0.453483	0.472754	0.492977	0.487351	0.468109	0.446363	0.418438	0.389121	0.373907	0.356048	0.346090	-4	-4	-4	-5	-5	-3	-4	-5	0	-3	-3	-4	-3	2	-5	-4	-4	0	9	-3	4	-1	-1	2	-3	1	-1	-1
2	0.471728	0.501388	0.491953	0.491775	0.465042	0.419136	0.376572	0.358232	0.343450	0.314033	0.301377	0.281324	0.246440	0.193039	0.169323	0.141459	0.115369	0.110689	0.101377	0.095952	0.080366	1	-3	-3	-3	-4	4	3	-4	-3	-4	-3	-2	-2	5	2	-2	-1	-3	-1	-3	-3	-1	-2	-2	-5	8	0	1
2	0.491953	0.491775	0.465042	0.419136	0.376572	0.358232	0.343450	0.314033	0.301377	0.281324	0.246440	0.193039	0.169323	0.141459	0.115369	0.110689	0.101377	0.095952	0.080366	0.074759	0.066461	6	-4	-4	-4	0	-3	-3	-2	-4	-3	-3	-3	-3	-4	-3	0	-2	-5	-4	1	-1	3	-2	-2	-4	1	0	-4
2	0.419136	0.376572	0.358232	0.343450	0.314033	0.301377	0.281324	0.246440	0.193039	0.169323	0.141459	0.115369	0.110689	0.101377	0.095952	0.080366	0.074759	0.066461	0.056615	0.048190	0.043748	-3	-3	-2	-5	-3	2	-4	-5	-4	-1	5	-4	4	1	-5	-4	-3	-4	-3	1	-2	-4	-2	-3	-5	-4	-4	7
2	0.376572	0.358232	0.343450	0.314033	0.301377	0.281324	0.246440	0.193039	0.169323	0.141459	0.115369	0.110689	0.101377	0.095952	0.080366	0.074759	0.066461	0.056615	0.048190	0.043748	0.047020	-2	-4	-2	-3	-5	-4	-4	7	-3	-6	-6	-4	-5	-5	-4	-2	-4	-5	-5	-5	-3	-4	-5	-5	-3	-4	-5	-5
2	0.080366	0.074759	0.066461	0.056615	0.048190	0.043748	0.047020	0.049174	0.061085	0.069444	0.074089	0.077197	0.071054	0.064529	0.066433	0.059383	0.054110	0.055313	0.060715	0.068405	0.073420	2	1	-2	3	-4	1	3	-3	-1	-2	-3	0	-3	-5	-3	-1	0	-5	-3	-1	4	-4	-4	-4	-2	-3	-4	1
2	0.047020	0.049174	0.061085	0.069444	0.074089	0.077197	0.071054	0.064529	0.066433	0.059383	0.054110	0.055313	0.060715	0.068405	0.073420	0.067529	0.065800	0.071421	0.065610	0.066254	0.081867	-2	-4	-3	-4	-4	-4	-4	7	-4	-4	-5	-4	-4	-5	-4	-2	-3	-5	-5	1	-4	3	1	7	-6	-2	-1	-3
2	0.472464	0.487190	0.488564	0.496549	0.498260	0.510509	0.508791	0.523293	0.538631	0.551862	0.570964	0.599287	0.620760	0.660702	0.693697	0.715334	0.734500	0.741441	0.754716	0.761532	0.768131	-2	-4	-3	-3	-4	-2	0	-4	4	-3	-3	-2	-1	-2	6	-2	-2	-3	5	0	-1	-1	-1	-2	-3	0	-3	6
2	0.496549	0.498260	0.510509	0.508791	0.523293	0.538631	0.551862	0.570964	0.599287	0.620760	0.660702	0.693697	0.715334	0.734500	0.741441	0.754716	0.761532	0.768131	0.761548	0.745616	0.725928	-4	-5	-5	-6	-4	-5	-5	-5	-3	-2	-2	-5	-2	8	-6	-5	-4	8	1	-3	-2	-4	-1	-3	-5	-3	-3	-4
2	0.662149	0.639014	0.615544	0.597708	0.601163	0.555119	0.545493	0.515352	0.497566	0.514384	0.522591	0.559342	0.593277	0.608048	0.614850	0.610493	0.600803	0.597443	0.590112	0.572983	0.567910	-1	-4	-5	-4	-3	-3	-5	-5	-5	1	5	-3	4	-1	-4	-4	-3	-4	-3	0	1	-2	-2	0	-5	0	3	-2
2	0.087045	0.090714	0.099492	0.108452	0.113868	0.132545	0.133859	0.122016	0.111149	0.096273	0.093065	0.131094	0.163187	0.187596	0.214979	0.220459	0.207285	0.205833	0.199045	0.192575	0.184045	-2	-1	4	3	-6	2	3	-2	2	-4	-5	0	-5	-2	-1	-1	0	-6	-1	-3	-2	-2	-2	2	-5	2	4	-3
2	0.163187	0.187596	0.214979	0.220459	0.207285	0.205833	0.199045	0.192575	0.184045	0.172493	0.151033	0.125237	0.093369	0.065846	0.035277	0.017367	0.010614	0.006537	0.007151	0.008574	0.009531	-3	-2	-1	-3	-1	-3	-4	1	-1	1	1	-1	1	5	-4	-3	-4	0	5	-1	0	3	1	2	-2	-2	2	-2
2	0.006537	0.007151	0.008574	0.009531	0.013541	0.015927	0.018288	0.019786	0.023706	0.026521	0.032242	0.036215	0.042667	0.046373	0.051438	0.057375	0.066755	0.073358	0.084755	0.095840	0.113800	1	-5	1	1	9	-2	-4	-4	-5	-2	-4	-4	-2	-5	-5	-1	0	-5	-5	2	-3	-4	6	4	-5	-3	-3	-3
2	0.015927	0.018288	0.019786	0.023706	0.026521	0.032242	0.036215	0.042667	0.046373	0.051438	0.057375	0.066755	0.073358	0.084755	0.095840	0.113800	0.143283	0.217139	0.308907	0.410533	0.520326	1	-1	-4	-3	-5	5	0	-2	-1	-1	-2	-1	0	-1	-5	-3	-3	-2	5	0	-1	1	0	2	-6	5	4	-4
2	0.019786	0.023706	0.026521	0.032242	0.036215	0.042667	0.046373	0.051438	0.057375	0.066755	0.073358	0.084755	0.095840	0.113800	0.143283	0.217139	0.308907	0.410533	0.520326	0.612757	0.695601	-2	-5	-6	-6	-4	-3	-2	-5	-6	4	4	-4	2	0	-6	-5	-1	-5	-4	3	5	-5	-3	-1	-4	-4	-4	3
2	0.036215	0.042667	0.046373	0.051438	0.057375	0.066755	0.073358	0.084755	0.095840	0.113800	0.143283	0.217139	0.308907	0.410533	0.520326	0.612757	0.695601	0.757046	0.802672	0.852858	0.858140	-3	-5	-6	-6	-2	-5	-6	-6	-6	5	4	-5	4	-3	-6	-5	-2	-5	-4	2	-3	-4	-3	-2	-6	-5	-4	7
2	0.410533	0.520326	0.612757	0.695601	0.757046	0.802672	0.852858	0.858140	0.858048	0.828206	0.803682	0.801113	0.797550	0.772934	0.727402	0.689965	0.672311	0.625383	0.577526	0.567547	0.552115	0	-1	1	1	2	0	-1	4	3	-1	-2	0	1	-4	-4	1	-3	-5	0	-4	-4	-4	-4	-5	2	-4	-4	-5
2	0.672311	0.625383	0.577526	0.567547	0.552115	0.499504	0.447412	0.415773	0.365811	0.340956	0.340950	0.340167	0.337144	0.331258	0.310001	0.268275	0.225528	0.190577	0.161485	0.160288	0.170803	-1	0	-3	-3	-4	-2	-1	-3	-1	4	2	-2	1	0	-1	-3	-1	-4	-2	2	-2	-3	2	5	-4	-3	-1	2
2	0.337144	0.331258	0.310001	0.268275	0.225528	0.190577	0.161485	0.160288	0.170803	0.178097	0.192743	0.235479	0.260277	0.296140	0.345140	0.395672	0.431514	0.465387	0.518396	0.550682	0.543971	0	-4	2	-1	-4	-3	-3	0	-4	-5	-5	-3	-4	-5	-4	5	4	-6	-5	-4	2	-5	-2	-4	0	-1	-4	-1
2	0.178097	0.192743	0.235479	0.260277	0.296140	0.345140	0.395672	0.431514	0.465387	0.518396	0.550682	0.543971	0.514065	0.487262	0.427916	0.379546	0.349351	0.327338	0.297401	0.253777	0.222692	1	2	1	-1	-1	0	0	-1	0	-3	-3	3	0	-1	-3	2	0	-5	-1	-3	2	4	1	0	-4	0	-2	-2
2	0	0	0	0	0	0	0	0	0	0.505720	0.570802	0.560538	0.489332	0.491436	0.421291	0.337600	0.270471	0.213577	0.182379	0.174333	0.154322	0	0	0	0	0	0	0	0	0	0	0	0	0	0	0	0	0	0	0	0	0	0	0	0	0	0	0	0
2	0.194152	0.168670	0.154152	0.146477	0.148022	0.162414	0.176087	0.175135	0.168532	0.151235	0.142561	0.139833	0.157824	0.173211	0.199408	0.256306	0.313672	0.370347	0.426139	0.473026	0.460993	-2	-3	-3	-6	-2	-3	-5	-5	-5	4	2	-5	7	-3	-5	-1	0	-1	-3	1	-3	1	-5	-3	-5	-1	0	-6
2	0.148022	0.162414	0.176087	0.175135	0.168532	0.151235	0.142561	0.139833	0.157824	0.173211	0.199408	0.256306	0.313672	0.370347	0.426139	0.473026	0.460993	0.413794	0.343462	0.263250	0.174441	-1	-1	-1	3	-5	0	4	-2	-4	-4	-5	1	-1	-2	-2	0	0	-6	-5	1	1	0	0	-2	-5	3	2	-4
2	0.036047	0.019906	0.012435	0.009722	0.009450	0.009729	0.010209	0.010743	0.012404	0.014168	0.016700	0.018013	0.020730	0.024022	0.029960	0.035445	0.048671	0.068637	0.096208	0.112003	0.143029	-3	-3	3	-1	-4	-3	-2	-3	4	3	1	-1	0	0	-4	-2	-1	0	3	1	1	-4	-2	-4	-2	-3	-4	7
2	0.009450	0.009729	0.010209	0.010743	0.012404	0.014168	0.016700	0.018013	0.020730	0.024022	0.029960	0.035445	0.048671	0.068637	0.096208	0.112003	0.143029	0.191546	0.255823	0.346772	0.475333	0	-4	-4	-5	-3	-4	-3	-2	-5	3	-1	-4	-2	-3	-4	-3	1	1	-4	6	-1	-4	-3	-4	-1	-4	-4	7
2	0.475333	0.600088	0.706654	0.789555	0.839164	0.848334	0.835152	0.799604	0.769782	0.719196	0.666347	0.603235	0.553772	0.485115	0.415030	0.353002	0.315580	0.296001	0.317767	0.380218	0.470164	-1	2	2	2	-3	-2	2	2	-1	-3	-4	0	-3	-5	0	0	1	-5	-4	-2	0	1	2	2	-5	1	0	0
2	0.706654	0.789555	0.839164	0.848334	0.835152	0.799604	0.769782	0.719196	0.666347	0.603235	0.553772	0.485115	0.415030	0.353002	0.315580	0.296001	0.317767	0.380218	0.470164	0.582584	0.664060	1	1	1	1	-5	-2	0	2	0	-3	-3	2	1	-2	3	-1	-2	-5	-2	-3	0	0	1	2	-4	1	2	1
2	0.789555	0.839164	0.848334	0.835152	0.799604	0.769782	0.719196	0.666347	0.603235	0.553772	0.485115	0.415030	0.353002	0.315580	0.296001	0.317767	0.380218	0.470164	0.582584	0.664060	0.685530	0	0	1	2	-4	1	2	1	2	-3	-4	1	-3	-2	-2	2	-2	-4	-2	-2	-2	-1	2	5	-4	0	0	2
2	0.070397	0.082705	0.105313	0.131846	0.160959	0.187016	0.216259	0.234794	0.250211	0.267751	0.265177	0.251235	0.243485	0.218771	0.191799	0.185880	0.179734	0.163715	0.152072	0.146640	0.124809	1	1	1	0	-4	3	1	-1	-2	-2	-2	3	0	-5	-3	1	0	-2	-3	-4	0	0	1	1	-4	-1	1	-1
2	0.105313	0.131846	0.160959	0.187016	0.216259	0.234794	0.250211	0.267751	0.265177	0.251235	0.243485	0.218771	0.191799	0.185880	0.179734	0.163715	0.152072	0.146640	0.124809	0.100517	0.078513	-2	-2	4	3	-5	1	0	4	-3	-4	-4	-1	-2	-5	-4	-1	-3	-2	-2	-5	0	2	0	2	-5	3	1	-1
2	0.026495	0.030064	0.043881	0.061312	0.075590	0.090156	0.094275	0.091201	0.088505	0.093543	0.087045	0.090714	0.099492	0.108452	0.113868	0.132545	0.133859	0.122016	0.111149	0.096273	0.093065	4	-5	-5	-5	-4	-4	-5	-4	-5	4	-1	-5	4	1	-5	0	-2	-5	-3	-1	5	-5	-4	-5	-4	-4	-4	5
2	0.075590	0.090156	0.094275	0.091201	0.088505	0.093543	0.087045	0.090714	0.099492	0.108452	0.113868	0.132545	0.133859	0.122016	0.111149	0.096273	0.093065	0.131094	0.163187	0.187596	0.214979	3	-2	2	-1	-5	-2	4	-3	2	-4	-2	-2	-4	-5	-4	2	2	-6	-3	-3	-3	-2	0	-2	-6	-2	-1	6
2	0.091201	0.088505	0.093543	0.087045	0.090714	0.099492	0.108452	0.113868	0.132545	0.133859	0.122016	0.111149	0.096273	0.093065	0.131094	0.163187	0.187596	0.214979	0.220459	0.207285	0.205833	-1	-4	-4	-4	-4	-5	-5	-6	-3	5	2	-5	-1	-1	-5	-5	-1	-5	-2	4	-2	0	1	4	-5	-1	-1	-2
2	0.193180	0.190204	0.211979	0.209908	0.183098	0.167977	0.128691	0.093248	0.095238	0.104358	0.106446	0.117289	0.124304	0.117539	0.110106	0.103967	0.094102	0.081990	0.086716	0.082231	0.072645	-3	-1	-3	-5	-5	-3	-4	-2	-4	1	2	-3	1	6	-3	-2	-1	1	3	0	-2	0	-1	3	3	-1	-1	-3
2	0.033887	0.043452	0.053840	0.062206	0.071904	0.076835	0.083491	0.090891	0.104185	0.113985	0.130664	0.159127	0.183936	0.215396	0.274020	0.350476	0.436223	0.525681	0.619510	0.690937	0.747392	5	-5	-3	-1	1	-4	-4	3	-5	-3	-5	-4	-2	-4	-4	0	2	-1	-2	-2	-1	4	0	0	-6	2	0	-3
2	0.062206	0.071904	0.076835	0.083491	0.090891	0.104185	0.113985	0.130664	0.159127	0.183936	0.215396	0.274020	0.350476	0.436223	0.525681	0.619510	0.690937	0.747392	0.751759	0.748545	0.735075	-3	-5	-6	-6	-3	-5	-6	-6	-6	5	4	-5	4	-3	-6	-3	-1	-5	-4	2	-3	-4	-3	-2	-6	-5	-4	7
2	0.071904	0.076835	0.083491	0.090891	0.104185	0.113985	0.130664	0.159127	0.183936	0.215396	0.274020	0.350476	0.436223	0.525681	0.619510	0.690937	0.747392	0.751759	0.748545	0.735075	0.725198	-3	-4	-3	-2	-6	-5	-4	7	-5	-7	-7	-3	-3	-6	-3	-2	-4	-6	-6	-6	1	-2	-2	-3	-5	1	1	-4
2	0.619510	0.690937	0.747392	0.751759	0.748545	0.735075	0.725198	0.682740	0.667861	0.638793	0.590695	0.541523	0.500190	0.431583	0.378642	0.353659	0.319590	0.306491	0.322558	0.326958	0.314728	-1	-4	0	-1	-4	-3	-1	6	-4	-5	-5	-1	-4	-5	-4	-1	-1	-5	-5	-5	-2	-1	6	0	-4	2	1	-2
2	0.231361	0.223501	0.248775	0.267065	0.283000	0.308092	0.355565	0.382063	0.410692	0.450556	0.495670	0.544024	0.594124	0.659180	0.694082	0.696826	0.662867	0.607955	0.504151	0.450578	0.418433	3	-4	-4	-4	-3	-4	-3	-2	-5	3	0	-4	-1	-3	-2	-3	-1	-5	-4	4	0	3	1	0	-4	1	0	-1
2	0.308092	0.355565	0.382063	0.410692	0.450556	0.495670	0.544024	0.594124	0.659180	0.694082	0.696826	0.662867	0.607955	0.504151	0.450578	0.418433	0.381041	0.337679	0.320199	0.315736	0.308078	2	3	1	0	-5	0	-1	-1	0	-5	-4	4	-4	-5	-2	0	-2	-5	-4	-2	-2	-5	-5	-5	-4	-4	-3	-3
2	0.594124	0.659180	0.694082	0.696826	0.662867	0.607955	0.504151	0.450578	0.418433	0.381041	0.337679	0.320199	0.315736	0.308078	0.296769	0.292879	0.263525	0.242559	0.213661	0.167550	0.130256	-2	-4	0	0	-5	-1	-1	0	2	-1	-3	-1	0	-5	6	0	-1	-6	-5	-3	-1	-1	-4	-5	1	-4	-2	-5
2	0	0	0	0	0	0	0	0	0	0.631643	0.581447	0.509843	0.392363	0.289779	0.209928	0.144571	0.119933	0.096400	0.090932	0.091402	0.110739	0	0	0	0	0	0	0	0	0	0	0	0	0	0	0	0	0	0	0	0	0	0	0	0	0	0	0	0
2	0.263525	0.242559	0.213661	0.167550	0.130256	0.105021	0.089667	0.086341	0.099250	0.145776	0.197312	0.257169	0.316381	0.358858	0.395476	0.462462	0.520956	0.534893	0.535684	0.500129	0.401553	0	0	-2	1	-5	-1	4	-2	-1	-4	-4	1	-2	-2	-1	0	1	-2	-4	0	1	0	0	0	-5	3	3	-3
2	0.115566	0.055052	0.019886	0.010260	0.007530	0.008331	0.009548	0.010563	0.011181	0.011773	0.011526	0.010715	0.010037	0.010708	0.011475	0.011178	0.015273	0.020198	0.030791	0.044856	0.061937	1	-1	0	0	-4	3	0	2	1	-2	-3	-1	-3	-3	1	0	-1	1	-1	0	-3	-4	-1	-1	-2	0	0	-4
2	0.030791	0.044856	0.061937	0.085564	0.135433	0.206078	0.316993	0.442273	0.578880	0.676820	0.755854	0.767852	0.750389	0.705967	0.668766	0.593405	0.531840	0.467979	0.428211	0.395125	0.407886	6	-4	-4	-3	-2	-4	-4	-3	-4	-1	-2	-4	-3	-4	-4	0	-1	-5	-1	2	-2	-1	-3	-2	1	-3	-4	-5
2	0.206078	0.316993	0.442273	0.578880	0.676820	0.755854	0.767852	0.750389	0.705967	0.668766	0.593405	0.531840	0.467979	0.428211	0.395125	0.407886	0.423378	0.449436	0.483307	0.549906	0.584760	-2	0	2	2	-1	-1	-2	2	-2	2	-3	-2	3	-3	0	-1	1	-5	-4	-1	0	0	1	2	-5	-1	2	2
2	0.755854	0.767852	0.750389	0.705967	0.668766	0.593405	0.531840	0.467979	0.428211	0.395125	0.407886	0.423378	0.449436	0.483307	0.549906	0.584760	0.631878	0.687444	0.727433	0.719453	0.733167	1	-3	0	4	-5	0	-2	2	1	-3	-4	-1	-2	-1	0	1	1	-5	-2	-2	3	-2	-1	-2	-4	-2	-3	4
2	0.445584	0.498447	0.510001	0.494877	0.500511	0.510115	0.473709	0.438062	0.439152	0.427500	0.397368	0.379053	0.343436	0.299316	0.232086	0.182115	0.129053	0.107425	0.097752	0.092032	0.099831	2	-2	-2	-3	-4	2	0	3	-1	-2	-2	1	-3	-2	3	1	-2	-4	-4	-3	3	-1	1	0	-4	0	1	-1
2	0.182115	0.129053	0.107425	0.097752	0.092032	0.099831	0.119505	0.119269	0.134813	0.154793	0.168191	0.171983	0.188962	0.205003	0.216507	0.241565	0.291369	0.328018	0.354347	0.358944	0.369560	3	0	0	1	0	0	0	-1	1	-1	-2	2	-2	-1	-3	1	-1	-4	2	-2	1	-1	3	-1	-4	1	-2	4
2	0.092032	0.099831	0.119505	0.119269	0.134813	0.154793	0.168191	0.171983	0.188962	0.205003	0.216507	0.241565	0.291369	0.328018	0.354347	0.358944	0.369560	0.311363	0.280402	0.260037	0.246685	-1	-3	-1	-4	-2	-3	-4	7	-1	-5	-4	-4	-5	-5	-4	-2	-1	-5	-5	-5	1	-2	-2	-3	6	-2	-3	-2
2	0.291369	0.328018	0.354347	0.358944	0.369560	0.311363	0.280402	0.260037	0.246685	0.229687	0.245946	0.246682	0.217441	0.182486	0.152290	0.115289	0.082746	0.064760	0.052056	0.034074	0.024170	1	-1	-4	-5	0	-2	-4	-3	-4	2	0	1	-1	0	1	-1	1	4	4	1	-2	-1	-1	-3	-1	-1	-2	-3
2	0.017221	0.021455	0.023440	0.026645	0.046172	0.078601	0.108608	0.143333	0.180333	0.206168	0.224451	0.242230	0.256245	0.243071	0.224014	0.211607	0.193180	0.190204	0.211979	0.209908	0.183098	5	-4	-4	-4	-4	-4	-3	0	-5	-3	-2	-4	-2	-3	-4	3	1	-6	-5	-2	2	-5	-6	-6	-4	-5	-4	-5
2	0.143333	0.180333	0.206168	0.224451	0.242230	0.256245	0.243071	0.224014	0.211607	0.193180	0.190204	0.211979	0.209908	0.183098	0.167977	0.128691	0.093248	0.095238	0.104358	0.106446	0.117289	-3	-2	0	-2	-6	-2	-1	7	1	-7	-6	0	-4	-6	-5	-3	-4	-6	-4	-6	1	-4	-5	-4	-4	-3	-4	-5
2	0.242230	0.256245	0.243071	0.224014	0.211607	0.193180	0.190204	0.211979	0.209908	0.183098	0.167977	0.128691	0.093248	0.095238	0.104358	0.106446	0.117289	0.124304	0.117539	0.110106	0.103967	-2	-1	1	5	-5	-3	-2	-2	-4	-4	-2	-1	-5	-5	5	-1	-1	-1	-1	-4	-1	-2	2	3	-6	1	4	-2
2	0.215338	0.213601	0.205049	0.206674	0.208039	0.220120	0.224169	0.242253	0.252387	0.232537	0.212158	0.189664	0.161241	0.130905	0.112615	0.094283	0.079113	0.065023	0.048296	0.040017	0.035975	2	-3	2	1	3	-2	-2	-1	1	-1	-3	-2	-3	-4	3	2	2	-4	-3	0	3	-3	1	-3	3	-2	-1	3
2	0.158409	0.143542	0.129198	0.113742	0.116495	0.138932	0.172097	0.193171	0.232792	0.249946	0.261846	0.270289	0.298686	0.322593	0.361099	0.398965	0.411826	0.403027	0.376679	0.325026	0.247317	2	-1	-1	2	-2	0	1	2	0	-4	-4	0	-3	-2	-1	1	0	-4	-1	-3	-1	-3	-3	-4	-3	-2	-3	-4
2	0.164282	0.131608	0.113727	0.093304	0.075059	0.068751	0.066994	0.067900	0.068247	0.072490	0.068099	0.062283	0.052075	0.042770	0.037388	0.043002	0.042771	0.047104	0.049827	0.064111	0.077861	5	-4	-2	-4	-1	-3	-3	-1	-4	-2	-2	-3	-2	-3	1	0	-1	-5	-4	1	2	1	0	3	-3	0	2	-1
2	0.310539	0.263580	0.227991	0.217521	0.209439	0.194289	0.208375	0.213903	0.255675	0.303250	0.364420	0.416404	0.492822	0.536721	0.549037	0.558395	0.574260	0.577680	0.569625	0.557739	0.542088	2	-1	-1	-4	1	-3	-4	-4	-4	3	2	-3	4	-3	-1	0	2	-4	-3	0	-3	7	1	-3	3	-1	-2	-4
2	0.557739	0.542088	0.518830	0.463534	0.392787	0.306042	0.222168	0.150514	0.102259	0.067010	0.045952	0.029136	0.023162	0.019463	0.015775	0.017855	0.018038	0.021099	0.024488	0.032344	0.035069	-2	-1	0	6	-5	-2	2	-2	-3	-5	-5	-1	-4	-5	2	0	-1	-5	-4	-4	1	-1	0	1	-1	-1	1	1
2	0.306042	0.222168	0.150514	0.102259	0.067010	0.045952	0.029136	0.023162	0.019463	0.015775	0.017855	0.018038	0.021099	0.024488	0.032344	0.035069	0.039793	0.045196	0.050051	0.052185	0.065240	-4	-4	0	8	-6	-3	0	-4	-4	-5	-6	-3	-5	-6	-4	-1	-3	-6	-5	-5	-4	-3	8	-1	-5	-2	-2	-2
2	0.171822	0.224060	0.285543	0.320348	0.296062	0.258386	0.212449	0.152903	0.106526	0.078494	0.055370	0.041880	0.031372	0.028099	0.022846	0.023639	0.027062	0.027429	0.026297	0.028776	0.037488	2	-3	0	3	0	-1	0	-1	-3	-2	-4	-2	-3	-4	-3	4	-1	-4	-3	-2	-1	0	-1	3	-5	0	2	-2
2	0.130588	0.140248	0.145294	0.143059	0.153828	0.171325	0.188418	0.216760	0.239153	0.240504	0.222791	0.198329	0.171944	0.140273	0.118048	0.122135	0.141864	0.194012	0.247638	0.300713	0.360175	-1	4	-2	-2	-1	0	1	-3	5	-5	-5	5	-4	-4	-4	-1	-3	-3	-2	-4	-4	-4	-1	8	-6	-2	1	-4
2	0.023639	0.027062	0.027429	0.026297	0.028776	0.037488	0.047867	0.054473	0.087369	0.113070	0.134475	0.150204	0.158055	0.160073	0.147510	0.127042	0.126016	0.134460	0.140921	0.147088	0.159604	-2	-4	-3	-5	3	-4	-4	-5	-5	1	-1	-4	-1	-3	-4	-3	-2	-5	-3	6	-3	-4	-5	-5	-3	-4	-5	-5
2	0.047867	0.054473	0.087369	0.113070	0.134475	0.150204	0.158055	0.160073	0.147510	0.127042	0.126016	0.134460	0.140921	0.147088	0.159604	0.180721	0.206970	0.242236	0.252041	0.286043	0.291704	-3	-4	-1	-3	-4	-2	-3	-3	-1	-3	-1	-1	1	7	-5	1	-1	3	1	-3	-4	-5	-5	-6	-4	-5	-5	-5
2	0.171325	0.188418	0.216760	0.239153	0.240504	0.222791	0.198329	0.171944	0.140273	0.118048	0.122135	0.141864	0.194012	0.247638	0.300713	0.360175	0.414008	0.414036	0.423734	0.412038	0.376652	-1	-2	-4	-4	-4	-3	-4	-2	2	-3	-3	-2	-3	0	2	-2	0	-1	8	-3	-2	-4	-2	-3	-5	-4	-4	7
2	0.245632	0.216418	0.200330	0.172934	0.161193	0.150209	0.143725	0.157037	0.186225	0.206881	0.213356	0.208292	0.212460	0.213964	0.218077	0.255622	0.276344	0.279370	0.266496	0.257490	0.219704	-3	-5	-5	-6	-4	-4	-5	-6	-3	2	5	-3	2	0	-5	-4	-4	-3	5	-2	-1	-1	2	0	-5	-2	-2	6
2	0.157037	0.186225	0.206881	0.213356	0.208292	0.212460	0.213964	0.218077	0.255622	0.276344	0.279370	0.266496	0.257490	0.219704	0.198726	0.159345	0.132699	0.115083	0.117661	0.116840	0.111055	0	0	-3	-4	-2	-3	2	-1	-4	0	2	-2	-1	-3	-4	0	-1	-5	-2	4	4	-3	-4	-4	-4	-1	-1	-1
2	0.016095	0.016798	0.017274	0.016034	0.015044	0.014399	0.013856	0.015455	0.018526	0.023908	0.029937	0.032369	0.032371	0.029996	0.026133	0.020522	0.018986	0.020127	0.025230	0.031613	0.037513	5	-4	-4	-4	4	-3	-4	1	-4	-2	-3	-3	-3	-4	-3	-1	-2	-5	-4	3	-3	0	-2	-5	-3	-3	-4	-1
2	0.013856	0.015455	0.018526	0.023908	0.029937	0.032369	0.032371	0.029996	0.026133	0.020522	0.018986	0.020127	0.025230	0.031613	0.037513	0.043338	0.055296	0.087999	0.117304	0.152724	0.214929	-2	-4	-2	1	-1	-1	0	-2	-4	-3	0	-3	-3	-3	-2	1	3	8	-2	0	-2	-4	-2	-3	-5	-4	-4	7
2	0.020522	0.018986	0.020127	0.025230	0.031613	0.037513	0.043338	0.055296	0.087999	0.117304	0.152724	0.214929	0.283221	0.329265	0.371384	0.400932	0.408343	0.375130	0.336208	0.318735	0.300196	-3	-5	-4	-5	-3	-1	-5	-6	-5	6	2	-4	0	-2	-5	-4	-3	-5	-3	4	-2	4	-2	-3	-5	0	-1	-4
2	0.017310	0.017549	0.017215	0.015931	0.017684	0.019434	0.020026	0.021729	0.023292	0.027120	0.031865	0.033174	0.032252	0.030320	0.025820	0.020733	0.019427	0.021282	0.023610	0.024563	0.024904	0	2	0	0	-1	0	-1	-2	0	-3	-2	3	-2	-2	-1	0	3	0	-4	-2	-3	-5	-5	-5	0	-3	-5	-5
2	0.017362	0.016853	0.016538	0.018606	0.020050	0.021853	0.028510	0.038516	0.054905	0.077190	0.104901	0.157090	0.188021	0.215254	0.244252	0.260676	0.242014	0.244377	0.236685	0.226335	0.205551	-4	-5	-6	-6	-3	-5	-6	-6	-6	6	2	-5	5	0	-6	-5	-3	-5	-3	2	-2	-5	-3	-4	-5	-4	-5	7
2	0.047945	0.057811	0.063474	0.062155	0.055717	0.046834	0.035907	0.026553	0.019919	0.013680	0.011356	0.009429	0.008536	0.006890	0.006314	0.006670	0.006456	0.006284	0.007758	0.011514	0.017801	5	-4	-4	-3	-4	-4	-4	5	-5	-5	-5	-4	-4	-6	-4	0	-3	-5	-5	-4	-3	-5	-6	-6	-4	-4	-6	-7
2	0.021210	0.019035	0.020629	0.023038	0.034802	0.041313	0.051659	0.065068	0.081634	0.088938	0.107632	0.117551	0.117516	0.130479	0.164876	0.194814	0.223567	0.270773	0.313101	0.370570	0.426870	-4	-4	0	8	-5	-3	-1	-3	-4	-6	-6	-3	-6	-6	-4	-2	-4	-7	-6	-6	-3	-4	-1	8	-6	-3	-1	-3
2	0.552271	0.526492	0.479460	0.431721	0.374510	0.306288	0.238278	0.188678	0.175652	0.166680	0.202513	0.222295	0.240325	0.222404	0.197866	0.168555	0.161203	0.158775	0.152043	0.166392	0.175960	2	0	-1	-2	-1	-1	0	0	-2	0	0	-1	0	0	0	1	0	0	-1	-1	0	-1	2	3	-4	0	-1	-1
2	0.025527	0.031098	0.037636	0.044770	0.064691	0.092318	0.118378	0.142785	0.165572	0.164999	0.156252	0.144321	0.126501	0.106535	0.098875	0.091104	0.081831	0.081265	0.097154	0.101181	0.103875	4	-3	-3	-3	0	0	-1	0	1	-2	0	-1	-1	-3	-4	1	-2	-4	-3	0	1	-2	-2	-3	0	0	0	-3
2	0.103875	0.117173	0.113005	0.095366	0.084643	0.073001	0.057240	0.051512	0.045933	0.043306	0.038555	0.035069	0.030529	0.024381	0.018308	0.013377	0.006247	0.004395	0.004408	0.005110	0.006443	-3	-5	-3	-4	-5	-5	-5	7	-5	-7	-7	-4	-6	-6	-5	-3	-4	-5	-6	-6	-4	8	-3	-4	-6	-2	-3	-5
2	0.006247	0.004395	0.004408	0.005110	0.006443	0.009392	0.013713	0.019963	0.025383	0.028216	0.029177	0.036751	0.047333	0.059316	0.069181	0.073934	0.066588	0.053988	0.039077	0.027594	0.022305	-5	-4	-1	8	-6	-3	-1	-4	-4	-6	-7	-3	-6	-6	-4	-3	-4	-7	-6	-6	-4	-5	-5	-6	-5	-4	-5	-6
2	0.047333	0.059316	0.069181	0.073934	0.066588	0.053988	0.039077	0.027594	0.022305	0.018834	0.014363	0.010772	0.008593	0.006501	0.006910	0.007834	0.008844	0.013266	0.020445	0.040412	0.075236	-4	-5	-6	-7	-2	-5	-6	-6	-6	1	6	-5	0	-1	-6	-5	-4	-4	-3	-1	0	2	0	1	-2	3	2	-3
2	0.006501	0.006910	0.007834	0.008844	0.013266	0.020445	0.040412	0.075236	0.109686	0.145359	0.188460	0.203115	0.199239	0.187685	0.158954	0.128221	0.109279	0.096124	0.082062	0.075572	0.064842	1	-5	-4	-5	8	-5	-5	-4	-5	-1	-2	-5	-2	-3	-5	-1	3	-5	-4	3	-3	-5	-6	-6	-4	-5	-5	-6
2	0.007834	0.008844	0.013266	0.020445	0.040412	0.075236	0.109686	0.145359	0.188460	0.203115	0.199239	0.187685	0.158954	0.128221	0.109279	0.096124	0.082062	0.075572	0.064842	0.055761	0.047275	-4	-6	-6	-6	-3	-6	-6	-6	-4	0	0	-6	-1	8	-6	-5	-4	-2	0	2	-3	-5	-3	-4	-5	-5	-5	7
2	0.122417	0.143001	0.164356	0.179466	0.192381	0.227734	0.248316	0.264873	0.284947	0.274118	0.247578	0.248971	0.229411	0.182770	0.145592	0.122826	0.081942	0.058045	0.047932	0.045627	0.039374	0	1	-5	-4	-2	-1	2	-4	-4	0	4	0	3	-3	-5	-4	-2	-5	-4	1	4	-1	-2	-1	-1	1	1	-2
2	0.058045	0.047932	0.045627	0.039374	0.035852	0.036409	0.037315	0.039924	0.043250	0.042853	0.040677	0.038454	0.032862	0.025199	0.021171	0.019362	0.016637	0.016102	0.017415	0.020766	0.025192	2	0	-3	0	-2	3	5	-3	-2	-3	-2	1	-2	-5	-4	-1	-1	-5	-2	-2	7	-4	-4	-5	-3	-4	-4	-2
2	0.040677	0.038454	0.032862	0.025199	0.021171	0.019362	0.016637	0.016102	0.017415	0.020766	0.025192	0.031299	0.042686	0.051583	0.064476	0.069514	0.071564	0.072432	0.071292	0.065308	0.069261	0	3	0	0	-4	3	2	1	-1	-5	-4	3	-3	-6	-4	0	-2	-4	-5	-3	2	-1	-3	-1	-4	-2	2	-4
2	0.005653	0.007122	0.008159	0.010801	0.017567	0.028482	0.043951	0.073938	0.125336	0.179689	0.252643	0.343246	0.445630	0.559247	0.668182	0.751087	0.778243	0.771605	0.690657	0.583639	0.444967	2	4	3	-3	-4	3	-2	-3	-2	-5	-1	2	0	-5	-4	0	-3	-5	-4	-4	-2	-3	-3	-3	-5	-4	-4	7
2	0.361401	0.380111	0.385155	0.372641	0.350408	0.319960	0.290450	0.262221	0.248259	0.215072	0.217592	0.218446	0.219806	0.210208	0.207188	0.178458	0.155465	0.131095	0.111231	0.088813	0.078128	-1	-2	-5	-3	-2	-2	-1	-4	-4	3	1	-3	0	0	2	-2	1	0	-3	4	1	-3	-1	1	2	-2	2	-1
2	0.356592	0.446712	0.490408	0.536799	0.520320	0.491114	0.478082	0.477012	0.447951	0.415177	0.378202	0.314743	0.268434	0.217181	0.171043	0.141096	0.114571	0.102868	0.099036	0.116430	0.151039	-2	-2	-2	0	-1	-2	-1	-1	-1	3	-1	-1	-1	-5	6	-2	-2	-6	-5	-1	1	-1	1	-1	1	-1	-2	-1
2	0.297502	0.273661	0.240024	0.215676	0.209304	0.194384	0.208130	0.239499	0.273232	0.292494	0.304496	0.275263	0.234638	0.200989	0.178616	0.181197	0.197393	0.254626	0.308219	0.357384	0.410834	0	-2	-2	3	-6	1	3	-3	7	-4	-3	1	-4	-4	-3	-2	-3	-5	0	-3	3	-2	-3	-4	5	-2	-3	-2
2	0.234638	0.200989	0.178616	0.181197	0.197393	0.254626	0.308219	0.357384	0.410834	0.456692	0.443073	0.399591	0.352291	0.278546	0.215987	0.178488	0.172614	0.156309	0.141673	0.131527	0.117845	1	-2	-2	-2	3	-3	-3	6	0	-4	-3	-2	-3	-4	-3	-2	-2	-4	-4	-2	-1	0	-2	-2	-1	-3	-3	-3
2	0.200989	0.178616	0.181197	0.197393	0.254626	0.308219	0.357384	0.410834	0.456692	0.443073	0.399591	0.352291	0.278546	0.215987	0.178488	0.172614	0.156309	0.141673	0.131527	0.117845	0.105318	-1	0	-2	-2	-1	-3	-3	-3	0	4	0	-2	-1	0	-3	-1	1	-3	-1	3	1	-2	-2	-4	-1	-1	-3	-3
2	0.131527	0.117845	0.105318	0.114857	0.119147	0.125966	0.155533	0.202486	0.237648	0.291233	0.322754	0.341629	0.307553	0.291756	0.269782	0.275204	0.270129	0.289770	0.288685	0.298930	0.282007	4	-3	-4	-3	-3	-4	-3	-3	-5	3	2	-5	-1	-2	-4	-3	-2	-1	-3	2	3	-2	-5	-5	2	-2	-5	-3
2	0.229078	0.227687	0.198683	0.193310	0.198382	0.188605	0.160144	0.141867	0.115055	0.090049	0.073045	0.073356	0.076623	0.095701	0.114052	0.138121	0.164620	0.180536	0.178815	0.186537	0.189056	1	-4	-5	-3	-2	-4	-3	-4	-2	0	4	-5	3	-3	-2	-1	-1	-5	-3	2	0	1	-4	-4	1	-4	-4	-3
2	0.360460	0.328305	0.278511	0.225660	0.186391	0.156004	0.131253	0.120863	0.129980	0.144412	0.156205	0.172533	0.184834	0.165072	0.144626	0.130416	0.120909	0.109183	0.105719	0.098545	0.089700	0	-1	0	-2	-2	-1	-3	-2	-2	-1	-2	-1	-1	-5	-2	3	5	-5	-3	-1	1	-5	0	-3	-2	-3	-5	-3
2	0.058367	0.047768	0.037986	0.032080	0.028040	0.022323	0.018323	0.015961	0.016908	0.024908	0.032003	0.048198	0.067452	0.093592	0.145458	0.193343	0.229783	0.274793	0.322813	0.346129	0.358713	-1	-1	-2	-2	-4	0	1	4	1	1	-2	-1	-2	-1	-3	-1	-1	-2	-1	1	-2	2	-1	0	-2	0	0	-3
2	0.049380	0.053377	0.061872	0.070057	0.073612	0.078504	0.088852	0.110695	0.156456	0.192677	0.222113	0.240087	0.231208	0.186322	0.146673	0.105637	0.071388	0.047645	0.034501	0.027448	0.023584	-1	1	6	-1	-3	-1	-3	-1	-1	-4	-5	2	-4	-3	-5	-1	1	-5	0	-3	0	-5	-5	-5	-1	-3	-4	-3
2	0.025993	0.031991	0.036331	0.037095	0.036492	0.035751	0.033914	0.035147	0.042983	0.048416	0.050991	0.061794	0.076369	0.083652	0.093561	0.101647	0.100951	0.104428	0.129067	0.175368	0.242115	-3	-3	-4	-3	-2	-3	-3	-3	1	2	4	-4	0	2	-4	-4	-3	4	2	0	-1	2	3	3	-5	1	3	-2
2	0.036492	0.035751	0.033914	0.035147	0.042983	0.048416	0.050991	0.061794	0.076369	0.083652	0.093561	0.101647	0.100951	0.104428	0.129067	0.175368	0.242115	0.347331	0.447157	0.541371	0.632359	1	1	-1	-1	-3	1	-1	0	3	-4	-2	0	1	-1	-4	1	2	-2	1	-3	-2	-5	-4	-5	-2	-4	-5	-5
2	0.035147	0.042983	0.048416	0.050991	0.061794	0.076369	0.083652	0.093561	0.101647	0.100951	0.104428	0.129067	0.175368	0.242115	0.347331	0.447157	0.541371	0.632359	0.718789	0.740208	0.793731	3	1	-3	-3	3	-2	-3	-4	-1	1	-2	-1	-3	-3	-4	3	-1	-5	-2	1	1	4	2	-1	-5	0	0	0
2	0.061794	0.076369	0.083652	0.093561	0.101647	0.100951	0.104428	0.129067	0.175368	0.242115	0.347331	0.447157	0.541371	0.632359	0.718789	0.740208	0.793731	0	0	0	0	-2	-1	-4	-5	-1	-1	-1	-5	1	2	1	-1	-1	1	-1	-2	-1	8	-2	1	-1	-2	-5	-5	-1	-4	-5	-5
2	0.258392	0.251408	0.228673	0.216559	0.197820	0.164561	0.128724	0.109514	0.096028	0.079472	0.067318	0.057550	0.046759	0.037365	0.032814	0.029783	0.027597	0.024624	0.022273	0.022945	0.027735	4	-3	1	-3	1	-2	0	-1	0	-1	-3	-3	-3	-4	3	1	1	-4	-3	0	3	-3	1	-3	4	-3	-1	3
2	0.315081	0.366890	0.412374	0.464221	0.540910	0.617235	0.693725	0.742660	0.773045	0.734641	0.625653	0.487827	0.377283	0.271561	0.208384	0.189593	0.181640	0.187145	0.185577	0.169194	0.159440	-1	-1	-2	-2	-3	-2	0	6	-3	-4	-4	-2	-3	-4	-3	-1	1	-3	-4	-3	-2	-1	-1	-3	-4	-1	-3	6
2	0.271561	0.208384	0.189593	0.181640	0.187145	0.185577	0.169194	0.159440	0.150914	0.138515	0.122931	0.126648	0.123982	0.138439	0.136508	0.137503	0.120429	0.105586	0.080865	0.063561	0.058956	0	-4	0	-3	-3	-3	-3	-2	-4	1	-2	-3	-3	-4	1	1	6	-5	-4	0	-1	-4	-2	0	7	-3	-3	-2
2	0.181640	0.187145	0.185577	0.169194	0.159440	0.150914	0.138515	0.122931	0.126648	0.123982	0.138439	0.136508	0.137503	0.120429	0.105586	0.080865	0.063561	0.058956	0.073259	0.092573	0.120703	0	-3	-1	-3	-3	0	-2	0	-3	-4	-4	-2	-3	-4	7	0	-1	-4	-3	-3	0	-3	-1	-2	-4	-3	-3	6
2	0.105586	0.080865	0.063561	0.058956	0.073259	0.092573	0.120703	0.158621	0.219907	0.246085	0.290505	0.327032	0.354495	0.362421	0.387839	0.393567	0.379572	0.347059	0.283846	0.239475	0.186324	3	-2	0	2	-1	-1	1	2	1	-4	-4	-1	-4	-2	-1	0	1	-4	-1	-3	0	-4	-4	-5	-4	-2	-4	-4
2	0	0	0	0	0	0	0	0	0	0.851056	0.819553	0.811693	0.791867	0.701991	0.591160	0.498129	0.408502	0.320754	0.264026	0.223308	0.180710	0	0	0	0	0	0	0	0	0	0	0	0	0	0	0	0	0	0	0	0	0	0	0	0	0	0	0	0
2	0.085014	0.093974	0.102615	0.133289	0.146360	0.178737	0.217445	0.250332	0.281015	0.303035	0.286593	0.283987	0.280450	0.258132	0.243477	0.247968	0.279842	0.313311	0.326782	0.327963	0.336048	-3	-4	-5	-6	-3	-4	-5	-6	-5	0	6	-4	0	-1	-5	-4	-3	-4	-3	-1	5	-4	-3	-4	-3	-3	-3	5
2	0.160744	0.158796	0.155865	0.135145	0.119562	0.108456	0.106463	0.116113	0.123163	0.143154	0.167321	0.179192	0.201646	0.221096	0.227090	0.225657	0.237184	0.227831	0.226544	0.227866	0.239836	1	-4	-5	-5	1	-4	-4	-5	-3	0	5	-3	2	1	-4	-3	-3	-3	0	0	-3	-3	-1	7	-5	-2	1	-1
2	0.362928	0.299677	0.285959	0.228508	0.193409	0.178026	0.189259	0.193241	0.213817	0.222131	0.263538	0.286481	0.310178	0.338084	0.377595	0.430380	0.458082	0.485094	0.514392	0.549705	0.546134	-2	-4	3	-3	-3	-3	-3	-4	-4	1	-1	-3	1	-3	-4	0	2	-5	-3	5	-1	-5	-5	-5	-3	-4	-5	-2
2	0.285959	0.228508	0.193409	0.178026	0.189259	0.193241	0.213817	0.222131	0.263538	0.286481	0.310178	0.338084	0.377595	0.430380	0.458082	0.485094	0.514392	0.549705	0.546134	0.506979	0.477528	2	0	-1	-4	1	-3	-4	-4	-4	3	2	-3	4	-3	-1	0	2	-4	-3	0	-3	7	1	-3	3	-1	-2	-4
2	0.228508	0.193409	0.178026	0.189259	0.193241	0.213817	0.222131	0.263538	0.286481	0.310178	0.338084	0.377595	0.430380	0.458082	0.485094	0.514392	0.549705	0.546134	0.506979	0.477528	0.439313	-3	7	1	-3	3	-1	-2	-4	-2	-5	-4	2	-3	-5	-4	-2	-3	-5	-4	-4	0	-3	-1	-3	5	-3	-3	-3
2	0.310178	0.338084	0.377595	0.430380	0.458082	0.485094	0.514392	0.549705	0.546134	0.506979	0.477528	0.439313	0.376133	0.306395	0.242004	0.187661	0.127379	0.094679	0.065640	0.048207	0.034605	1	2	1	-3	-5	3	-1	-3	2	-5	-5	6	-3	-5	-3	-2	-3	-5	-4	-4	0	1	-1	0	-4	0	2	-1
2	0.506979	0.477528	0.439313	0.376133	0.306395	0.242004	0.187661	0.127379	0.094679	0.065640	0.048207	0.034605	0.028782	0.023358	0.019223	0.022358	0.020690	0.022890	0.025649	0.032313	0.035360	-1	-3	0	6	-5	-1	3	-2	1	-5	-5	-1	0	-5	2	0	-2	-5	-4	-4	1	-1	-1	1	-1	-2	-1	2
2	0.242004	0.187661	0.127379	0.094679	0.065640	0.048207	0.034605	0.028782	0.023358	0.019223	0.022358	0.020690	0.022890	0.025649	0.032313	0.035360	0.041496	0.050257	0.060805	0.067672	0.083726	-4	-4	0	8	-6	-3	0	-4	-4	-5	-6	-3	-5	-6	-4	-2	-4	-6	-5	-5	-4	-3	8	-1	-5	-2	-2	-3
2	0.174503	0.212998	0.269225	0.322925	0.331363	0.324000	0.304943	0.258333	0.189245	0.133272	0.086223	0.053095	0.035448	0.027950	0.022863	0.023526	0.028926	0.031820	0.033026	0.033135	0.037574	2	-3	0	3	0	-1	0	-1	-3	-2	-4	-2	-3	-4	-3	4	-1	-4	-4	-2	-1	0	-1	3	-5	0	2	-2
2	0.086223	0.053095	0.035448	0.027950	0.022863	0.023526	0.028926	0.031820	0.033026	0.033135	0.037574	0.049635	0.052547	0.081525	0.109979	0.137683	0.157165	0.175756	0.178621	0.174248	0.146904	-2	1	-2	-3	1	-1	-1	-3	-1	-4	-4	7	-3	-5	-3	-1	0	-5	-4	-4	-3	1	-5	-5	-3	-3	-4	-5
2	0.023526	0.028926	0.031820	0.033026	0.033135	0.037574	0.049635	0.052547	0.081525	0.109979	0.137683	0.157165	0.175756	0.178621	0.174248	0.146904	0.129528	0.147038	0.150934	0.150703	0.141516	-2	-4	-3	-5	3	-4	-4	-5	-5	1	-1	-4	-1	-3	-4	-3	-2	-5	-3	6	-3	-4	-5	-5	-3	-4	-5	-5
2	0.049635	0.052547	0.081525	0.109979	0.137683	0.157165	0.175756	0.178621	0.174248	0.146904	0.129528	0.147038	0.150934	0.150703	0.141516	0.149961	0.162567	0.190918	0.224787	0.267089	0.307714	-3	-4	-1	-3	-4	-2	-3	-3	0	-3	-1	-1	1	7	-5	1	-1	3	1	-3	-4	-5	-5	-6	-4	-5	-5	-5
2	0.247968	0.279842	0.313311	0.326782	0.327963	0.336048	0.325803	0.301458	0.296286	0.270019	0.267713	0.269027	0.333697	0.395166	0.466959	0.549961	0.618581	0.666491	0.706218	0.747920	0.768213	-1	-2	-4	-4	-4	-3	-4	-2	2	-3	-3	-2	-3	1	2	-1	-1	-1	8	-3	-2	-4	-2	-3	-5	-4	-4	7
2	0.144076	0.156371	0.174821	0.176759	0.188546	0.186074	0.193399	0.210616	0.243502	0.246852	0.244221	0.255888	0.268021	0.263550	0.277796	0.298901	0.312963	0.347380	0.366736	0.382286	0.384431	2	0	-3	-3	0	-3	-4	-2	-4	2	1	1	0	-4	2	-2	-1	-5	-4	2	3	-1	-1	-3	-3	1	-1	0
2	0.244221	0.255888	0.268021	0.263550	0.277796	0.298901	0.312963	0.347380	0.366736	0.382286	0.384431	0.377656	0.361646	0.327587	0.301378	0.304081	0.303061	0.284618	0.301617	0.323996	0.341485	1	0	-2	-3	-5	6	1	-1	-1	-4	-5	3	-2	-6	3	-1	-2	-5	-4	-4	5	-2	-3	-3	-3	-1	-2	-3
2	0.277796	0.298901	0.312963	0.347380	0.366736	0.382286	0.384431	0.377656	0.361646	0.327587	0.301378	0.304081	0.303061	0.284618	0.301617	0.323996	0.341485	0.329713	0.322457	0.316708	0.303229	1	-2	0	5	-5	0	4	-2	-1	-5	-1	-1	-3	-5	-3	-1	-1	-6	-5	-4	3	-1	4	3	-1	1	0	-1
2	0.377656	0.361646	0.327587	0.301378	0.304081	0.303061	0.284618	0.301617	0.323996	0.341485	0.329713	0.322457	0.316708	0.303229	0.303276	0.340979	0.376689	0.400111	0.425746	0.434155	0.406139	-3	-5	-5	-6	-4	-4	-5	-6	-4	2	5	-3	2	0	-5	-4	-4	-3	5	-1	-2	-1	2	0	-5	-1	-2	6
2	0.301617	0.323996	0.341485	0.329713	0.322457	0.316708	0.303229	0.303276	0.340979	0.376689	0.400111	0.425746	0.434155	0.406139	0.374280	0.324270	0.271014	0.223645	0.211764	0.181194	0.164530	0	0	-3	-4	-2	-3	2	-1	-4	0	2	-2	-1	-3	-4	-1	-1	-4	-1	4	4	-3	-4	-4	-4	-2	-1	-1
2	0.323996	0.341485	0.329713	0.322457	0.316708	0.303229	0.303276	0.340979	0.376689	0.400111	0.425746	0.434155	0.406139	0.374280	0.324270	0.271014	0.223645	0.211764	0.181194	0.164530	0.173487	4	-3	-4	-4	-4	-2	-1	-1	-3	-3	-4	-3	-4	-5	6	-2	-2	-5	-4	-1	-1	-5	-5	-5	1	-4	-4	-5
2	0.322457	0.316708	0.303229	0.303276	0.340979	0.376689	0.400111	0.425746	0.434155	0.406139	0.374280	0.324270	0.271014	0.223645	0.211764	0.181194	0.164530	0.173487	0.163861	0.143634	0.140231	-3	0	6	1	2	-2	-3	4	1	-6	-6	-2	-5	-6	0	0	-3	-6	-5	-5	-1	-5	-4	-5	8	-4	-4	-5
2	0.163861	0.143634	0.140231	0.132165	0.118090	0.099473	0.079232	0.065444	0.066985	0.072163	0.076061	0.070488	0.063727	0.060515	0.059247	0.049331	0.049990	0.055468	0.066134	0.081222	0.099542	-4	-2	-6	-6	-4	-5	-5	-6	-5	6	0	-5	5	-3	-5	-5	-3	-5	-4	3	-3	2	-2	2	-5	0	5	-4
2	0.063727	0.060515	0.059247	0.049331	0.049990	0.055468	0.066134	0.081222	0.099542	0.114659	0.127720	0.131781	0.125128	0.117833	0.143303	0.168024	0.190111	0.209215	0.234957	0.281530	0.285453	-4	-4	3	8	-6	-3	-1	-2	-3	-6	-6	-1	-6	-6	-4	-3	-3	-7	-6	-6	-2	-5	-2	0	-5	-4	-4	7
2	0.017831	0.019719	0.020154	0.017703	0.016595	0.016220	0.016607	0.016736	0.019335	0.025621	0.034772	0.041414	0.047360	0.049491	0.047840	0.040847	0.036189	0.032760	0.034213	0.038110	0.044507	5	-4	-4	-4	-3	-3	-3	1	-4	-2	-2	-3	-2	-4	-3	-1	-2	-5	-4	2	-3	-2	-4	-5	-3	-2	-3	-5
2	0.016607	0.016736	0.019335	0.025621	0.034772	0.041414	0.047360	0.049491	0.047840	0.040847	0.036189	0.032760	0.034213	0.038110	0.044507	0.049932	0.063264	0.099384	0.136868	0.174210	0.243274	0	-4	-2	-2	-3	-1	-3	-3	-4	-1	0	-3	-2	-3	0	1	3	8	-2	0	-2	-4	-2	1	-5	-4	-4	7
2	0.040847	0.036189	0.032760	0.034213	0.038110	0.044507	0.049932	0.063264	0.099384	0.136868	0.174210	0.243274	0.318995	0.361978	0.415379	0.477225	0.507360	0.513421	0.526618	0.531057	0.533586	-3	-1	-4	-5	-3	-4	-5	-6	-5	6	2	-4	0	-2	-5	-4	-3	-5	-3	3	-2	5	-2	-3	-5	0	-1	-4
2	0.047483	0.060553	0.071281	0.085622	0.120526	0.155066	0.191570	0.252983	0.329618	0.388069	0.455240	0.521679	0.563791	0.584660	0.602294	0.612889	0.599960	0.596415	0.573032	0.531795	0.485321	-4	6	0	-3	-5	-1	-2	-5	1	-2	-1	3	-1	-2	-4	-3	-2	-4	1	-2	-3	-5	-5	-5	-3	-5	-5	-6
2	0.252983	0.329618	0.388069	0.455240	0.521679	0.563791	0.584660	0.602294	0.612889	0.599960	0.596415	0.573032	0.531795	0.485321	0.445490	0.398924	0.384581	0.390044	0.414396	0.401395	0.383729	6	-3	-3	-3	-2	0	-2	1	-3	-3	-3	-2	-3	-4	-2	1	-2	-4	-3	-2	-2	-3	-2	-3	-3	-3	-3	6
2	0.338107	0.267525	0.233152	0.209702	0.196770	0.197593	0.184112	0.158714	0.145427	0.124129	0.099927	0.079756	0.074873	0.070150	0.078487	0.082744	0.089791	0.087133	0.085153	0.077256	0.067601	0	-3	2	-1	-1	-3	-3	0	-4	-3	-4	-3	-3	-4	-1	-1	6	-5	-4	-1	0	-4	-1	-3	-3	-3	-3	-2
2	0.085153	0.077256	0.067601	0.055370	0.058975	0.065835	0.085358	0.110277	0.158815	0.202110	0.274389	0.349257	0.411739	0.462966	0.507945	0.519012	0.495363	0.449834	0.388132	0.322648	0.257398	3	0	-1	3	-2	0	1	2	0	-4	-4	0	-3	-3	-2	0	-1	-4	-2	-3	-1	-2	-4	-4	-1	-3	-4	-4
2	0	0	0	0	0	0	0	0	0	0.830567	0.843024	0.819490	0.811256	0.778337	0.706628	0.585023	0.462771	0.347384	0.243001	0.189997	0.165728	0	0	0	0	0	0	0	0	0	0	0	0	0	0	0	0	0	0	0	0	0	0	0	0	0	0	0	0
2	0.243001	0.189997	0.165728	0.142238	0.138172	0.131476	0.142241	0.151346	0.154278	0.161030	0.155049	0.138945	0.126595	0.116023	0.110141	0.120410	0.121410	0.127226	0.132936	0.139862	0.147362	5	-4	-2	-4	-1	-3	-3	-2	-4	0	-2	-3	0	-3	-1	0	0	-5	-4	1	1	1	0	3	-3	0	2	-1
2	0.152999	0.123805	0.099247	0.080574	0.080273	0.087236	0.098734	0.116598	0.135166	0.129623	0.124146	0.116623	0.104358	0.093493	0.092010	0.087428	0.092503	0.100799	0.108114	0.115635	0.125797	4	-4	1	-3	0	0	1	-1	-1	-1	-1	-3	-3	-4	-4	0	-1	-5	-4	1	0	-5	-2	-2	-3	-5	-5	-5
2	0.459345	0.430277	0.427051	0.404324	0.412436	0.395671	0.385279	0.363779	0.357104	0.317603	0.273371	0.227076	0.216375	0.229270	0.248924	0.283876	0.319121	0.350788	0.367187	0.370099	0.369713	5	-2	-2	-2	1	-2	-1	-1	-2	-2	-2	-2	-2	-3	-2	0	-1	-3	-2	-2	0	-3	-2	-2	-3	-2	-2	6
2	0	0	0	0	0	0	0	0	0.830567	0.843024	0.819490	0.811256	0.778337	0.706628	0.585023	0.462771	0.347384	0.243001	0.189997	0.165728	0.142238	0	0	0	0	0	0	0	0	0	0	0	0	0	0	0	0	0	0	0	0	0	0	0	0	0	0	0	0
2	0.123721	0.123687	0.125777	0.131172	0.129585	0.132698	0.147203	0.163305	0.187076	0.211473	0.234526	0.268980	0.287245	0.293738	0.300794	0.324700	0.308980	0.291328	0.282962	0.288302	0.285478	0	-3	-1	6	-5	-2	1	-1	-2	-5	-5	-2	-5	-5	2	0	-3	0	-2	-5	-3	-4	-5	-5	-4	-1	-2	-5
2	0.131172	0.129585	0.132698	0.147203	0.163305	0.187076	0.211473	0.234526	0.268980	0.287245	0.293738	0.300794	0.324700	0.308980	0.291328	0.282962	0.288302	0.285478	0.309331	0.332492	0.348277	0	0	-4	-5	-4	-1	-3	-5	-4	1	2	-3	8	-2	-5	-3	-3	-4	-3	0	-1	-4	-3	-4	-3	-4	-4	-4
2	0.542996	0.528331	0.516699	0.479120	0.464476	0.454220	0.463438	0.480996	0.523924	0.549889	0.569582	0.625332	0.677157	0.698524	0.727227	0.743400	0.728720	0.706465	0.707559	0.708941	0.719895	-3	-4	2	-1	-4	0	-1	1	-4	-1	-1	1	0	-5	-5	-1	1	-6	-5	4	2	1	-4	-1	-4	-4	-1	-2
2	0.516699	0.479120	0.464476	0.454220	0.463438	0.480996	0.523924	0.549889	0.569582	0.625332	0.677157	0.698524	0.727227	0.743400	0.728720	0.706465	0.707559	0.708941	0.719895	0.684870	0.655498	2	1	-1	-4	0	0	-4	-1	1	1	0	-1	2	2	0	-1	2	-5	-3	-1	-2	6	0	-4	1	0	-1	-1
2	0.479120	0.464476	0.454220	0.463438	0.480996	0.523924	0.549889	0.569582	0.625332	0.677157	0.698524	0.727227	0.743400	0.728720	0.706465	0.707559	0.708941	0.719895	0.684870	0.655498	0.626666	-2	6	0	-4	1	0	-1	-1	3	-6	-5	0	-4	-6	1	2	-3	-6	-4	-5	-1	-4	-2	-5	3	-4	-4	-5
2	0.549889	0.569582	0.625332	0.677157	0.698524	0.727227	0.743400	0.728720	0.706465	0.707559	0.708941	0.719895	0.684870	0.655498	0.626666	0.567330	0.481059	0.381219	0.286918	0.194855	0.127669	-2	-3	3	3	-5	-2	-1	-2	7	1	-2	-3	-4	-4	0	0	-3	-5	-3	-4	-2	-1	-3	-3	-1	-1	-2	3
2	0.677157	0.698524	0.727227	0.743400	0.728720	0.706465	0.707559	0.708941	0.719895	0.684870	0.655498	0.626666	0.567330	0.481059	0.381219	0.286918	0.194855	0.127669	0.076628	0.054624	0.040018	-1	1	-1	-3	-4	0	1	-4	0	-1	-1	5	-3	-4	3	-2	-1	-5	-4	-3	0	1	-2	-1	-4	2	3	1
2	0.684870	0.655498	0.626666	0.567330	0.481059	0.381219	0.286918	0.194855	0.127669	0.076628	0.054624	0.040018	0.032467	0.026045	0.021216	0.024428	0.024347	0.026610	0.028096	0.031141	0.032319	-2	-3	0	6	-5	1	3	-2	1	-5	-5	-1	-5	-5	1	0	-2	-5	-5	-5	1	0	-1	-1	-2	-2	0	3
2	0.381219	0.286918	0.194855	0.127669	0.076628	0.054624	0.040018	0.032467	0.026045	0.021216	0.024428	0.024347	0.026610	0.028096	0.031141	0.032319	0.036414	0.040782	0.046104	0.054538	0.069835	-4	-4	0	7	-6	-3	0	2	-4	-6	-6	-3	-5	-6	-4	-2	-4	-6	-5	-5	-4	4	7	-2	-5	-2	-2	-3
2	0.164316	0.204416	0.266940	0.298450	0.286638	0.273223	0.259458	0.224267	0.189920	0.163075	0.129609	0.102456	0.069447	0.057098	0.047229	0.042852	0.041188	0.036870	0.034490	0.035201	0.033100	2	-3	-1	1	-1	-2	-1	-1	-1	-3	-4	-2	-3	-3	-3	4	-1	-3	2	-3	-1	0	-1	2	-5	0	1	-2
2	0.140109	0.144672	0.137508	0.132841	0.141342	0.162796	0.174896	0.195920	0.201145	0.191043	0.170957	0.154293	0.137417	0.118316	0.109760	0.125496	0.147507	0.196542	0.240988	0.296317	0.360478	-1	4	-1	-2	-3	1	1	-2	4	-5	-5	5	-4	-4	-4	-1	-3	-4	-3	-4	-4	-4	0	8	-6	-2	0	-3
2	0.042852	0.041188	0.036870	0.034490	0.035201	0.033100	0.030044	0.033215	0.051224	0.063860	0.084634	0.094513	0.095682	0.082002	0.067558	0.047586	0.033423	0.030432	0.034263	0.038460	0.047960	0	-4	-3	-5	1	-4	-4	-5	-5	1	-1	-4	-1	-3	2	-3	-1	-5	-3	6	-3	-4	-5	-5	-3	-4	-4	-5
2	0.030044	0.033215	0.051224	0.063860	0.084634	0.094513	0.095682	0.082002	0.067558	0.047586	0.033423	0.030432	0.034263	0.038460	0.047960	0.068605	0.103583	0.143863	0.185487	0.231534	0.259036	-2	-4	1	-1	-4	-1	0	0	1	-4	-2	-1	3	5	-4	3	-1	2	1	-4	-4	-4	-5	-5	-4	-5	-5	-5
2	0.333256	0.308192	0.324115	0.327202	0.353717	0.362273	0.370138	0.352201	0.368100	0.347208	0.309526	0.274791	0.241446	0.194407	0.155938	0.139119	0.119843	0.093978	0.079542	0.078945	0.079687	-2	-1	-3	-3	-3	-1	-2	-4	5	2	1	-1	2	0	-3	-3	-1	1	2	2	-2	-3	-3	-3	-3	0	-2	0
2	0.324115	0.327202	0.353717	0.362273	0.370138	0.352201	0.368100	0.347208	0.309526	0.274791	0.241446	0.194407	0.155938	0.139119	0.119843	0.093978	0.079542	0.078945	0.079687	0.081469	0.079937	-2	7	-2	-3	-2	0	-1	0	-2	-4	-3	1	-3	-4	-3	-2	-2	0	-3	-3	-2	0	-2	-2	-4	-1	-1	-3
2	0.162796	0.174896	0.195920	0.201145	0.191043	0.170957	0.154293	0.137417	0.118316	0.109760	0.125496	0.147507	0.196542	0.240988	0.296317	0.360478	0.428504	0.473083	0.547352	0.593621	0.615092	-1	-3	-4	-4	-4	-3	-4	-2	2	-3	-3	-2	-3	2	1	-1	-1	-1	8	-3	-2	-4	-2	-3	-5	-4	-4	7
2	0.093978	0.079542	0.078945	0.079687	0.081469	0.079937	0.089449	0.108241	0.149650	0.204589	0.260666	0.329926	0.368524	0.374328	0.376992	0.354712	0.320860	0.289825	0.250892	0.210223	0.201815	-1	-2	-5	-6	-2	-4	-5	-5	-5	4	2	-5	2	1	-5	-3	-1	-5	-3	4	1	-2	0	-4	1	-3	-4	-4
2	0.079687	0.081469	0.079937	0.089449	0.108241	0.149650	0.204589	0.260666	0.329926	0.368524	0.374328	0.376992	0.354712	0.320860	0.289825	0.250892	0.210223	0.201815	0.198140	0.186625	0.194798	-2	-5	-5	-6	-2	-5	-5	-6	-5	3	0	-5	2	-2	-5	-3	-1	-5	-4	6	1	-3	0	-3	-2	-3	-3	-3
2	0.320860	0.289825	0.250892	0.210223	0.201815	0.198140	0.186625	0.194798	0.214214	0.225031	0.220923	0.218016	0.218075	0.207169	0.226309	0.273398	0.300098	0.322876	0.343437	0.343029	0.311752	-3	-4	1	-5	-4	-4	-5	-5	-3	0	5	-4	2	0	-4	-3	-3	-3	5	-2	-1	-1	1	0	-5	-2	-2	6
2	0.194798	0.214214	0.225031	0.220923	0.218016	0.218075	0.207169	0.226309	0.273398	0.300098	0.322876	0.343437	0.343029	0.311752	0.286277	0.233329	0.183731	0.136164	0.106266	0.080930	0.070189	0	0	-4	-4	-2	-3	2	-1	-4	0	2	-2	-1	-3	-3	-1	-1	-4	-2	4	4	-3	1	-4	-4	-2	-1	-1
2	0.214214	0.225031	0.220923	0.218016	0.218075	0.207169	0.226309	0.273398	0.300098	0.322876	0.343437	0.343029	0.311752	0.286277	0.233329	0.183731	0.136164	0.106266	0.080930	0.070189	0.069941	4	-3	1	-4	-4	-2	-1	-1	-3	-3	-5	-3	-4	-5	6	-2	-2	-6	-5	-1	-1	-5	-5	-6	1	-4	-5	-6
2	0.082094	0.068607	0.049044	0.032046	0.026062	0.025958	0.042959	0.049793	0.061151	0.081890	0.097195	0.109153	0.132331	0.157611	0.179454	0.207845	0.219846	0.219630	0.209354	0.185288	0.148415	1	-3	-4	-4	-5	-2	-2	-4	-4	-5	-5	-3	-5	-6	8	-1	-1	-6	-4	-4	-3	0	-2	3	-6	4	6	-3
2	0.025958	0.042959	0.049793	0.061151	0.081890	0.097195	0.109153	0.132331	0.157611	0.179454	0.207845	0.219846	0.219630	0.209354	0.185288	0.148415	0.118924	0.121343	0.132562	0.154271	0.183090	-2	-4	-5	-6	-3	-5	-5	-6	-6	1	-1	-5	-2	-3	-5	-4	-2	-5	-4	7	-2	5	-3	-4	-5	-2	0	-4
2	0.081890	0.097195	0.109153	0.132331	0.157611	0.179454	0.207845	0.219846	0.219630	0.209354	0.185288	0.148415	0.118924	0.121343	0.132562	0.154271	0.183090	0.214290	0.229723	0.235940	0.245764	-2	-5	-2	0	-5	-4	-4	7	-4	-6	-6	-2	-5	-6	-5	-3	-4	-5	-6	-6	-2	0	-2	1	-5	3	5	-4
2	0.296317	0.360478	0.428504	0.473083	0.547352	0.593621	0.615092	0.618733	0.585417	0.553276	0.477726	0.380977	0.280891	0.190321	0.099664	0.048703	0.026703	0.015591	0.011318	0.008877	0.007249	-3	-3	-1	7	-6	-2	4	-4	-3	-5	-5	-2	-5	-6	-3	-2	-3	-6	-5	-4	-2	-3	-2	-3	-4	-4	-4	7
2	0	0	0	0	0.830567	0.843024	0.819490	0.811256	0.778337	0.706628	0.585023	0.462771	0.347384	0.243001	0.189997	0.165728	0.142238	0.138172	0.131476	0.142241	0.151346	0	0	0	0	0	0	0	0	0	0	0	0	0	0	0	0	0	0	0	0	0	0	0	0	0	0	0	0
2	0.007249	0.007340	0.007461	0.007783	0.007179	0.006562	0.006283	0.006289	0.007369	0.009619	0.012962	0.016869	0.020191	0.021911	0.023407	0.023927	0.026237	0.030658	0.039692	0.047483	0.060553	6	-4	-4	-4	-3	-3	-3	1	-4	-2	-3	-3	-3	-4	-3	-1	-2	-5	-4	2	-3	-1	-4	0	-1	-3	-3	-5
2	0.006283	0.006289	0.007369	0.009619	0.012962	0.016869	0.020191	0.021911	0.023407	0.023927	0.026237	0.030658	0.039692	0.047483	0.060553	0.071281	0.085622	0.120526	0.155066	0.191570	0.252983	0	-4	-1	-2	-4	-2	-3	-2	-4	-2	-1	-3	-3	-3	0	2	3	8	-2	0	-2	-4	-2	2	-4	-3	-2	6
2	0.009619	0.012962	0.016869	0.020191	0.021911	0.023407	0.023927	0.026237	0.030658	0.039692	0.047483	0.060553	0.071281	0.085622	0.120526	0.155066	0.191570	0.252983	0.329618	0.388069	0.455240	-2	0	-4	-5	-3	-3	-3	-5	-2	2	-2	-4	-1	3	-4	-4	-3	-2	6	4	-2	2	-1	-2	-2	0	-1	-4
2	0.023927	0.026237	0.030658	0.039692	0.047483	0.060553	0.071281	0.085622	0.120526	0.155066	0.191570	0.252983	0.329618	0.388069	0.455240	0.521679	0.563791	0.584660	0.602294	0.612889	0.599960	-3	-2	-4	-5	-4	-5	-5	-6	-5	7	2	-5	0	-2	-5	-5	-3	-5	-4	3	-2	5	-1	-3	-5	-1	-2	-4
2	0.104247	0.126010	0.132837	0.133357	0.115724	0.105309	0.115556	0.149504	0.190469	0.234397	0.244872	0.226672	0.176874	0.118828	0.064524	0.038306	0.017898	0.013259	0.011503	0.010456	0.010615	0	-3	0	-1	-3	1	-2	4	0	-4	-1	-2	-3	-5	3	-1	-2	-6	-5	1	0	-2	-2	-1	1	2	2	-1
2	0.126010	0.132837	0.133357	0.115724	0.105309	0.115556	0.149504	0.190469	0.234397	0.244872	0.226672	0.176874	0.118828	0.064524	0.038306	0.017898	0.013259	0.011503	0.010456	0.010615	0.009495	0	-2	-2	-1	1	2	2	-1	0	-2	-3	-2	0	-5	1	-1	5	-5	-4	0	-2	-2	-1	2	0	-3	-3	-1
2	0.132837	0.133357	0.115724	0.105309	0.115556	0.149504	0.190469	0.234397	0.244872	0.226672	0.176874	0.118828	0.064524	0.038306	0.017898	0.013259	0.011503	0.010456	0.010615	0.009495	0.007876	-2	-2	-1	2	0	-3	-3	-1	-3	-1	-1	-3	-1	-4	0	4	4	-4	-3	1	-3	-3	1	2	-4	-4	-3	-3
2	0.234397	0.244872	0.226672	0.176874	0.118828	0.064524	0.038306	0.017898	0.013259	0.011503	0.010456	0.010615	0.009495	0.007876	0.006601	0.005864	0.005279	0.007035	0.012373	0.027094	0.044789	1	1	0	3	-2	1	2	-3	-1	-2	-2	2	-1	-3	-4	-1	0	2	-2	-2	-2	-1	-3	-5	-2	-2	-3	-5
2	0.027094	0.044789	0.063372	0.095354	0.122785	0.141795	0.153930	0.156190	0.158061	0.152945	0.137181	0.118877	0.109802	0.080423	0.061179	0.051991	0.047257	0.046342	0.053092	0.056901	0.061093	2	-5	-5	-6	-3	-4	-5	1	-6	5	1	-5	-1	-3	-1	-3	-3	-3	-4	3	-1	-3	-2	-2	-4	-1	-3	-4
2	0.029194	0.031865	0.032614	0.031972	0.037970	0.049354	0.067277	0.108711	0.189870	0.280976	0.358187	0.435848	0.503988	0.531426	0.540631	0.535863	0.535261	0.516881	0.525173	0.489299	0.469867	-4	-2	-3	-1	-7	-1	8	-5	-3	-6	-6	-2	-5	-6	-4	-3	-3	-6	-5	-5	-3	-4	7	5	-4	-3	-1	-3
2	0.031972	0.037970	0.049354	0.067277	0.108711	0.189870	0.280976	0.358187	0.435848	0.503988	0.531426	0.540631	0.535863	0.535261	0.516881	0.525173	0.489299	0.469867	0.423418	0.373843	0.279801	1	-3	-1	5	-5	-2	2	0	0	-2	-3	-2	-3	-3	0	1	0	-5	0	-4	1	2	-5	-5	0	-3	-4	-5
2	0.189870	0.280976	0.358187	0.435848	0.503988	0.531426	0.540631	0.535863	0.535261	0.516881	0.525173	0.489299	0.469867	0.423418	0.373843	0.279801	0.220579	0.171021	0.138768	0.103352	0.086520	-1	1	3	-3	-4	-2	-1	1	-2	-2	3	-2	3	-2	-4	-3	-3	-4	0	-2	0	2	-2	-3	-1	3	1	-2
2	0.054688	0.038761	0.030253	0.021762	0.020885	0.021209	0.023592	0.027298	0.029175	0.029105	0.025408	0.020562	0.014952	0.010570	0.006645	0.005431	0.005170	0.005653	0.006538	0.007739	0.010515	-1	-2	-2	-1	-5	0	6	-5	-3	-1	-1	-1	-2	-5	-4	-1	-2	-6	-4	0	6	-4	-3	-4	0	0	-4	-2
2	0.036373	0.033773	0.033589	0.037091	0.039932	0.040211	0.039581	0.035775	0.028504	0.022210	0.020608	0.021290	0.027851	0.045075	0.078031	0.130287	0.199169	0.284207	0.353325	0.415601	0.464987	0	-3	2	5	-5	-1	1	2	0	-5	-5	-2	-5	-5	-4	2	0	-1	-4	-4	-2	2	-2	2	-1	1	1	4
2	0.037091	0.039932	0.040211	0.039581	0.035775	0.028504	0.022210	0.020608	0.021290	0.027851	0.045075	0.078031	0.130287	0.199169	0.284207	0.353325	0.415601	0.464987	0.479115	0.448443	0.434005	-1	1	-4	-4	-2	1	0	-1	-2	0	-1	-1	-1	4	-5	-2	0	1	4	1	-1	2	-1	0	-2	2	2	-5
2	0.039091	0.050234	0.056134	0.058125	0.052107	0.045242	0.034093	0.029185	0.030391	0.042164	0.052384	0.060657	0.064281	0.063780	0.056723	0.055603	0.051785	0.051925	0.045507	0.041069	0.038856	-1	-2	-1	4	-6	0	5	-3	-2	-6	-6	0	-5	-6	-1	2	-1	-6	-5	-5	0	-2	0	6	2	-1	2	-1
2	0.081985	0.087911	0.101617	0.118624	0.165966	0.249830	0.337062	0.426799	0.507082	0.557991	0.567734	0.550682	0.500025	0.436803	0.375393	0.325982	0.289375	0.278527	0.274784	0.266585	0.249265	-2	-4	-3	-4	-4	-3	-3	-4	-4	-4	-5	-3	-4	-5	-4	5	6	-6	-5	-4	-2	-5	-2	8	-6	-3	-1	-3
2	0.249830	0.337062	0.426799	0.507082	0.557991	0.567734	0.550682	0.500025	0.436803	0.375393	0.325982	0.289375	0.278527	0.274784	0.266585	0.249265	0.234731	0.212685	0.196235	0.173415	0.167539	-3	-3	-4	-5	4	-4	-4	-5	8	-3	-3	-5	-4	6	-6	-1	-4	-1	3	-4	-1	0	3	0	3	-2	-2	-3
2	0.557991	0.567734	0.550682	0.500025	0.436803	0.375393	0.325982	0.289375	0.278527	0.274784	0.266585	0.249265	0.234731	0.212685	0.196235	0.173415	0.167539	0.163561	0.141113	0.139763	0.141884	-2	-3	-2	1	-6	5	5	-3	1	-4	0	-2	0	-5	-4	-3	-3	-5	-4	-4	-3	0	-3	-3	-6	-1	-2	-4
2	0.104250	0.101130	0.087237	0.081697	0.087379	0.108642	0.139101	0.172863	0.205860	0.220899	0.243129	0.255499	0.245458	0.217724	0.202260	0.176368	0.144154	0.108184	0.076998	0.053141	0.031073	-3	-5	-6	-6	-4	-5	-6	-4	-5	0	4	-5	7	2	-3	-4	-4	-3	-1	1	1	-3	-2	0	-4	-1	-2	-2
2	0.176368	0.144154	0.108184	0.076998	0.053141	0.031073	0.018338	0.015768	0.014390	0.014121	0.013401	0.013952	0.013366	0.012699	0.011473	0.010884	0.010669	0.016909	0.027643	0.037705	0.043511	-3	-2	-6	-5	-5	-4	0	-6	-5	2	4	-3	1	-1	3	-4	-4	-1	-2	0	0	-1	4	-1	1	2	4	-2
2	0.076998	0.053141	0.031073	0.018338	0.015768	0.014390	0.014121	0.013401	0.013952	0.013366	0.012699	0.011473	0.010884	0.010669	0.016909	0.027643	0.037705	0.043511	0.049810	0.046751	0.039071	-3	-5	-6	-6	-5	-5	-6	-6	-5	1	2	-6	2	6	-6	-5	-4	3	1	2	1	-5	-5	-6	1	-4	-5	-5
2	0.013952	0.013366	0.012699	0.011473	0.010884	0.010669	0.016909	0.027643	0.037705	0.043511	0.049810	0.046751	0.039071	0.029882	0.025234	0.017341	0.012534	0.008565	0.006961	0.005402	0.005328	2	-5	-4	-5	-1	-4	-4	-5	-1	-1	-5	-4	-3	-6	7	-2	-1	-6	-5	-1	7	-4	-3	-5	-2	-1	-3	-3
2	0.005546	0.005820	0.006374	0.008426	0.012452	0.019193	0.028984	0.046084	0.066865	0.110788	0.170911	0.222541	0.276254	0.298821	0.288030	0.246392	0.201897	0.149139	0.118512	0.102874	0.093697	-4	-6	-6	-6	-4	-5	-6	-7	-6	5	4	-6	0	4	-6	-5	-4	-4	-3	1	1	-5	-4	-5	0	-5	-5	-5
2	0.222541	0.276254	0.298821	0.288030	0.246392	0.201897	0.149139	0.118512	0.102874	0.093697	0.092900	0.088486	0.085978	0.072042	0.059857	0.046886	0.033972	0.022557	0.014421	0.012320	0.011774	-3	-6	-6	-6	-2	-5	-6	-7	-5	6	1	-6	0	-2	-6	-5	-3	-5	-1	4	-2	1	0	3	-5	-1	0	-2
2	0.014106	0.016240	0.018594	0.020697	0.022687	0.026280	0.032646	0.044641	0.057551	0.073472	0.094236	0.103578	0.107442	0.107332	0.122106	0.127262	0.147761	0.166142	0.185779	0.195399	0.217534	-3	-4	-3	-4	-2	-4	-4	-5	-5	-2	-3	-4	-3	-5	-4	-2	7	-6	-4	3	-4	-5	-6	-6	-4	-5	-6	-6
2	0.296036	0.368868	0.453550	0.536047	0.627254	0.716926	0.748088	0.791643	0.782234	0.764974	0.715726	0	0	0	0	0	0	0	0	0	0	-3	-1	-3	-6	-3	-5	-4	-6	0	-3	0	-5	1	7	0	-4	-4	2	5	-3	-4	-4	-6	-6	-2	-4	-6	-4
2	0.383712	0.337797	0.301410	0.248891	0.180229	0.123127	0.071049	0.045482	0.037729	0.027415	0.026879	0.027743	0.031168	0.035799	0.041654	0.045279	0.048246	0.048249	0.042190	0.041430	0.053249	0	-1	-1	3	-4	0	3	2	-2	-4	-3	0	-3	-4	1	1	0	-5	-3	-4	4	-5	-1	0	0	-3	-2	4
2	0.041430	0.053249	0.064135	0.073805	0.090950	0.124444	0.158754	0.172933	0.185257	0.199896	0.188251	0.161510	0.158343	0.150553	0.131263	0.119451	0.105448	0.094134	0.084057	0.077178	0.067639	1	-5	-3	1	1	-3	-2	-1	-5	-2	-3	-4	0	-5	4	1	2	-6	-5	2	-4	-3	-1	-4	-6	3	-2	-5
2	0	0	0	0	0.142295	0.118908	0.101136	0.064802	0.048952	0.030248	0.024134	0.023126	0.023402	0.023683	0.029035	0.033478	0.034968	0.035198	0.036373	0.033773	0.033589	0	0	0	0	0	0	0	0	0	0	0	0	0	0	0	0	0	0	0	0	0	0	0	0	0	0	0	0
2	0.246897	0.242696	0.213719	0.174598	0.151254	0.130467	0.126810	0.130540	0.144562	0.153158	0.162688	0.160459	0.152377	0.131522	0.123943	0.118688	0.133251	0.176682	0.234762	0.281247	0.307286	-2	0	0	-2	-5	2	4	-3	-3	-2	-4	-3	-4	-3	-4	-1	-2	9	1	-4	-3	-3	-3	-4	-4	-3	-3	-2
2	0.105019	0.080623	0.060626	0.048861	0.050362	0.065719	0.097325	0.150322	0.214654	0.258895	0.280123	0.289148	0.262707	0.220780	0.186919	0.158818	0.130661	0.117557	0.107791	0.108547	0.105044	1	1	-1	2	-5	0	2	0	-2	-3	-2	0	-4	-5	-4	3	-1	-1	-2	-3	0	-5	-5	-3	-5	-4	-5	-1
2	0.048861	0.050362	0.065719	0.097325	0.150322	0.214654	0.258895	0.280123	0.289148	0.262707	0.220780	0.186919	0.158818	0.130661	0.117557	0.107791	0.108547	0.105044	0.093433	0.080579	0.067308	1	2	-1	2	-5	3	3	-1	0	-3	-4	-2	-4	-5	-4	-1	1	-5	-4	-2	3	2	2	1	-5	-1	0	0
2	0.439544	0.393009	0.406257	0.418840	0.430795	0.460968	0.510127	0.536303	0.581852	0.639373	0.696377	0.745986	0.768034	0.790262	0.794788	0.786298	0.751688	0.695749	0.615984	0.519155	0.428114	1	2	-3	1	-5	1	2	1	-1	-1	-2	1	-2	-5	-4	-1	0	-5	-2	0	1	0	-3	4	-5	2	4	-4
2	0.460968	0.510127	0.536303	0.581852	0.639373	0.696377	0.745986	0.768034	0.790262	0.794788	0.786298	0.751688	0.695749	0.615984	0.519155	0.428114	0.345751	0.269081	0.198362	0.142173	0.087429	3	1	-2	-1	-4	0	1	2	-4	-4	-2	-3	0	0	-4	2	-2	-5	-4	0	2	-1	-4	-3	0	0	-2	-4
2	0.696377	0.745986	0.768034	0.790262	0.794788	0.786298	0.751688	0.695749	0.615984	0.519155	0.428114	0.345751	0.269081	0.198362	0.142173	0.087429	0.047935	0.031950	0.028980	0.028397	0.038879	1	3	-4	-4	-4	-3	0	-5	-4	0	3	1	1	-1	0	-2	-3	-5	-4	1	2	0	1	1	-5	3	2	-2
2	0.037475	0.035635	0.037334	0.037787	0.046878	0.069667	0.123536	0.171417	0.220956	0.284586	0.337039	0.385356	0.453328	0.508113	0.546452	0.557284	0.535232	0.495217	0.487747	0.455676	0.462405	-4	-4	-1	8	-6	-3	-1	-4	-4	-6	-6	-3	-6	-6	-4	-3	-4	-7	-6	-6	1	-3	4	-1	-5	4	-2	-1
2	0.232293	0.190921	0.147589	0.111108	0.087170	0.065535	0.060452	0.060848	0.085834	0.108653	0.133576	0.162630	0.187933	0.187529	0.188879	0.183190	0.166086	0.136166	0.107347	0.081297	0.061060	3	-3	1	-2	2	-3	-3	2	-3	-4	-4	-3	-3	-2	-3	4	1	-4	-4	-2	-3	1	6	4	-5	1	-2	-2
2	0.087170	0.065535	0.060452	0.060848	0.085834	0.108653	0.133576	0.162630	0.187933	0.187529	0.188879	0.183190	0.166086	0.136166	0.107347	0.081297	0.061060	0.041013	0.034857	0.032612	0.030816	0	-2	-1	-4	1	0	-2	-4	5	-3	2	-3	-2	3	1	-1	-3	-3	4	-3	-4	-5	-6	-6	-4	-5	-5	-6
2	0.065535	0.060452	0.060848	0.085834	0.108653	0.133576	0.162630	0.187933	0.187529	0.188879	0.183190	0.166086	0.136166	0.107347	0.081297	0.061060	0.041013	0.034857	0.032612	0.030816	0.031888	-4	-5	-6	-6	-4	-5	-5	-6	-5	1	5	-5	3	1	-5	-5	-1	-4	1	1	0	2	-1	3	-5	3	1	-1
2	0.085834	0.108653	0.133576	0.162630	0.187933	0.187529	0.188879	0.183190	0.166086	0.136166	0.107347	0.081297	0.061060	0.041013	0.034857	0.032612	0.030816	0.031888	0.040468	0.055818	0.085348	-1	-5	-5	-5	-4	-4	-1	-5	-5	1	3	-5	1	4	-1	-4	-1	3	0	3	1	-4	-4	-4	-3	-4	-4	-3
2	0.090190	0.084551	0.062802	0.048648	0.043567	0.048611	0.060663	0.072430	0.083509	0.104855	0.123479	0.140408	0.150868	0.167028	0.177507	0.189663	0.204873	0.237770	0.270026	0.281199	0.277309	-2	0	-2	-1	-5	-1	6	-2	-2	-4	-3	0	-4	-1	1	-2	-3	-4	-4	-4	-3	-1	-2	-3	-3	-1	-1	-2
2	0.270026	0.281199	0.277309	0.261660	0.229959	0.202314	0.192398	0.189492	0.180885	0.173758	0.152240	0.124498	0.088938	0.062205	0.038881	0.024623	0.015324	0.011622	0.011346	0.013640	0.018598	-2	0	2	1	-1	-1	1	1	0	1	-2	-3	-3	-4	-4	1	1	-4	-4	2	1	0	-2	3	-4	2	5	-2
2	0.281199	0.277309	0.261660	0.229959	0.202314	0.192398	0.189492	0.180885	0.173758	0.152240	0.124498	0.088938	0.062205	0.038881	0.024623	0.015324	0.011622	0.011346	0.013640	0.018598	0.026983	1	0	-2	3	-4	2	5	-2	-1	-4	-3	1	-3	-5	-2	-2	0	-4	-4	-4	1	0	0	4	-4	-1	0	-3
2	0.038881	0.024623	0.015324	0.011622	0.011346	0.013640	0.018598	0.026983	0.036062	0.045744	0.066275	0.109535	0.179248	0.306179	0.466422	0.624888	0.764159	0.879563	0.941057	0.960415	0.973183	4	1	-4	-4	-3	-3	-3	-3	-4	1	-2	-1	0	-4	-4	-2	0	-5	-4	3	0	4	0	1	-5	0	2	-1
2	0.495217	0.487747	0.455676	0.462405	0.456756	0.511881	0.547240	0.593674	0.637825	0.684114	0.693705	0.678472	0.642153	0.601171	0.567269	0.562089	0.527700	0.516555	0.463413	0.417888	0.334598	2	2	-3	-3	-4	-2	-1	-2	-2	-2	-1	-3	-3	2	5	-1	-3	-3	2	-2	-2	-5	-5	-5	-4	-4	0	-5
2	0.637825	0.684114	0.693705	0.678472	0.642153	0.601171	0.567269	0.562089	0.527700	0.516555	0.463413	0.417888	0.334598	0.253672	0.200959	0.182330	0.143556	0.124361	0.114193	0.098778	0.088387	5	-4	-2	-4	-4	0	-2	1	0	-1	-4	-3	1	-4	2	0	-1	-5	0	-1	0	0	2	4	-5	3	0	-2
2	0.253672	0.200959	0.182330	0.143556	0.124361	0.114193	0.098778	0.088387	0.092707	0.090487	0.084438	0.074454	0.069107	0.061790	0.059726	0.068536	0.076286	0.082476	0.097632	0.102777	0.113004	0	-5	-5	-5	-4	-5	-2	-3	-5	-1	4	-5	-2	5	0	-3	-4	-3	1	0	4	-4	-4	-1	-1	0	-1	-1
2	0.257396	0.256089	0.248142	0.228012	0.188285	0.140672	0.098432	0.064533	0.048825	0.050154	0.058177	0.064167	0.073088	0.077526	0.070689	0.063236	0.061500	0.071800	0.092806	0.133053	0.181296	2	-4	1	-2	1	1	-1	-1	1	0	-4	-4	2	-1	1	1	2	-5	-4	1	-1	6	-3	0	-5	2	0	-5
2	0.123442	0.099763	0.081861	0.089179	0.108054	0.127144	0.148920	0.155607	0.144194	0.122191	0.094512	0.068887	0.049360	0.036613	0.029164	0.020893	0.016543	0.014410	0.011107	0.008173	0.006453	-3	-3	0	1	-4	-4	-4	-4	-2	0	4	-4	1	-4	-2	0	3	-4	-2	0	0	1	-3	-1	-3	1	0	-2
2	0.158810	0.188996	0.195621	0.193486	0.191184	0.170547	0.146127	0.135181	0.115594	0.098267	0.088708	0.076604	0.066198	0.059037	0.050670	0.040290	0.036214	0.035890	0.037389	0.044599	0.059962	1	-1	-1	2	-3	2	3	0	0	-2	-3	1	-3	-4	-2	1	-1	-5	-4	-3	-1	-1	0	0	-3	-1	1	-4
2	0.195621	0.193486	0.191184	0.170547	0.146127	0.135181	0.115594	0.098267	0.088708	0.076604	0.066198	0.059037	0.050670	0.040290	0.036214	0.035890	0.037389	0.044599	0.059962	0.076969	0.089968	-2	-1	-3	-4	-2	-1	-2	-2	-2	1	4	0	1	2	1	-1	-2	-5	-1	-1	1	1	1	3	-5	0	3	0
2	0.050670	0.040290	0.036214	0.035890	0.037389	0.044599	0.059962	0.076969	0.089968	0.110972	0.135459	0.154723	0.189617	0.227212	0.268920	0.307229	0.350801	0.378886	0.365923	0.333350	0.293343	1	-5	-6	-6	2	-5	-5	-6	-2	5	-1	-5	-1	-3	-5	-4	-2	-5	0	5	-1	0	4	-3	2	-3	-3	-3
2	0.079882	0.058472	0.052071	0.046499	0.040604	0.034834	0.031608	0.026850	0.028207	0.036062	0.047154	0.051990	0.059069	0.056007	0.044892	0.033127	0.027632	0.019714	0.019401	0.026089	0.044410	2	-2	-3	-4	-1	-3	-4	6	-4	-6	-6	-4	-4	-6	-3	-2	-1	-6	-6	-5	-3	4	-1	-2	-3	0	0	-4
2	0.081975	0.086580	0.087934	0.101243	0.123606	0.133887	0.169286	0.220146	0.286729	0.348221	0.382315	0.405341	0.427492	0.425605	0.425202	0.456381	0.479809	0.514601	0.510783	0.492808	0.448251	-3	-4	7	5	-6	-3	-1	-3	-2	-6	-6	-3	-4	-6	-5	-1	-2	-7	-5	-5	0	-3	1	2	-5	0	2	4
2	0.040604	0.034834	0.031608	0.026850	0.028207	0.036062	0.047154	0.051990	0.059069	0.056007	0.044892	0.033127	0.027632	0.019714	0.019401	0.026089	0.044410	0.069605	0.101081	0.129560	0.144752	-3	-2	4	1	-2	-1	-3	-3	-4	-2	1	-3	-2	-3	-4	0	5	-5	-3	-3	3	-4	-1	2	-5	-1	1	-1
2	0.152235	0.189590	0.193647	0.217120	0.226522	0.210570	0.181239	0.168478	0.136976	0.097753	0.072551	0.052520	0.037258	0.024144	0.019413	0.015692	0.013665	0.012732	0.010565	0.009576	0.008549	5	-4	-4	-4	-3	-3	2	3	-4	-4	-4	-3	-4	-5	-3	2	-1	-6	-5	-2	3	-5	-5	-4	-4	-4	-5	-2
2	0.016516	0.035538	0.062482	0.093806	0.135721	0.193246	0.247123	0.301650	0.336985	0.332644	0.302412	0.252930	0.191976	0.134503	0.098469	0.066211	0.045936	0.026558	0.020100	0.022523	0.026034	-3	-5	-6	-7	-3	-5	-6	-7	-6	0	6	-6	-1	2	-3	-5	-4	-4	-4	-1	-1	-4	-2	-5	-3	-4	-3	1
2	0.026558	0.020100	0.022523	0.026034	0.031451	0.033428	0.034666	0.035567	0.032950	0.029921	0.028039	0.028327	0.036750	0.050593	0.062689	0.077789	0.085761	0.078024	0.064990	0.052517	0.040639	2	1	1	-2	-1	0	-2	-2	0	-3	1	4	-2	0	-2	-1	-3	-2	2	-2	2	-1	-4	-5	2	-4	-4	-2
2	0.027516	0.026242	0.026638	0.031360	0.045754	0.090742	0.156422	0.244157	0.316616	0.386871	0.410575	0.415870	0.356174	0.301261	0.252113	0.216123	0.192475	0.214893	0.223315	0.224546	0.209587	-2	-4	-3	-4	-4	-3	-3	-4	-4	-3	-5	-3	-4	-5	-4	5	5	-6	-5	-4	-2	-5	-2	8	-2	-3	-1	-2
2	0.050184	0.034703	0.021392	0.015792	0.012110	0.010712	0.009881	0.009264	0.010093	0.011758	0.012849	0.014877	0.016847	0.019911	0.028042	0.040195	0.052523	0.058085	0.063752	0.059903	0.050447	-2	-5	-6	-6	-5	-5	-6	-6	-5	0	2	-6	2	7	-6	-5	-4	3	1	2	1	-4	-6	-6	1	-4	-5	-5
2	0.009264	0.010093	0.011758	0.012849	0.014877	0.016847	0.019911	0.028042	0.040195	0.052523	0.058085	0.063752	0.059903	0.050447	0.038373	0.033946	0.024278	0.017908	0.013818	0.011356	0.007718	0	0	7	-2	-5	-1	-2	1	-2	-4	-5	0	-3	-5	-5	-2	-1	-6	-4	-5	3	-5	-3	-5	-1	-3	-4	-4
2	0.010093	0.011758	0.012849	0.014877	0.016847	0.019911	0.028042	0.040195	0.052523	0.058085	0.063752	0.059903	0.050447	0.038373	0.033946	0.024278	0.017908	0.013818	0.011356	0.007718	0.008025	3	-5	-3	-5	-1	-3	-4	-4	-1	-1	-5	-4	-3	-6	7	-2	-1	-6	-5	-1	7	-4	-3	-5	-2	-1	-3	-3
2	0.013818	0.011356	0.007718	0.008025	0.008592	0.011036	0.013000	0.020255	0.030173	0.045853	0.070504	0.097554	0.117195	0.164335	0.239853	0.312205	0.369983	0.403635	0.380502	0.322170	0.236520	3	-2	-1	-4	-1	-2	-3	-2	-1	-5	-4	0	-2	1	-4	4	-2	-2	4	-4	-3	-4	-1	8	-5	-3	-1	-4
2	0.008025	0.008592	0.011036	0.013000	0.020255	0.030173	0.045853	0.070504	0.097554	0.117195	0.164335	0.239853	0.312205	0.369983	0.403635	0.380502	0.322170	0.236520	0.164374	0.109162	0.079397	-5	-5	-1	8	-7	-3	-1	-4	-2	-6	-7	-4	-6	-7	-4	-3	-4	-7	-6	-6	-4	-6	-6	-6	-4	-5	-6	-7
2	0.030173	0.045853	0.070504	0.097554	0.117195	0.164335	0.239853	0.312205	0.369983	0.403635	0.380502	0.322170	0.236520	0.164374	0.109162	0.079397	0.051811	0.041655	0.031053	0.028681	0.024824	-2	-3	2	8	-6	-2	-1	-4	-3	-6	-6	-2	-6	-6	-4	-2	-4	-7	-1	-6	-2	-4	-5	-4	-5	-4	-3	-4
2	0.109162	0.079397	0.051811	0.041655	0.031053	0.028681	0.024824	0.019145	0.015084	0.010582	0.006640	0.004414	0.004017	0.004087	0.004427	0.005192	0.006869	0.008133	0.008247	0.007307	0.006605	-3	-4	-1	0	-5	2	-2	-2	6	-4	-3	-3	2	-4	-4	5	1	-5	1	-4	1	3	3	-1	-5	-2	-2	0
2	0.009712	0.013013	0.017889	0.029640	0.042874	0.059372	0.092992	0.116933	0.142624	0.162616	0.214575	0.271831	0.335953	0.374093	0.396488	0.384601	0.355437	0.332161	0.314724	0.303866	0.292869	-3	-5	-3	-4	-6	-5	-5	7	-5	-7	-7	-4	-6	-6	-5	-3	-5	-6	-6	-6	-2	4	1	-1	-5	3	3	-4
2	0.350688	0.383850	0.395932	0.433609	0.431646	0.436663	0.456925	0.491767	0.540435	0.592504	0.636725	0.665176	0.692257	0.712955	0.721738	0.731706	0.737676	0.740700	0.743742	0.753741	0.770303	1	-3	-2	-1	-4	0	-2	2	-4	-5	-4	-1	-4	-5	6	2	-1	-5	-4	-4	3	-2	-1	2	-4	-1	-1	-2
2	0	0	0	0	0	0.555774	0.464091	0.408098	0.301561	0.187544	0.131298	0.106031	0.079882	0.058472	0.052071	0.046499	0.040604	0.034834	0.031608	0.026850	0.028207	0	0	0	0	0	0	0	0	0	0	0	0	0	0	0	0	0	0	0	0	0	0	0	0	0	0	0	0
2	0.240219	0.252637	0.265818	0.274593	0.284423	0.257372	0.221716	0.193647	0.160063	0.117698	0.102679	0.084712	0.068480	0.053250	0.057424	0.061840	0.071650	0.093778	0.118661	0.137834	0.199003	-2	-2	-3	-1	-5	0	2	-3	-2	3	0	-1	0	-3	5	-3	-2	-6	-3	1	-1	-3	2	-1	-5	-2	-2	7
2	0.265818	0.274593	0.284423	0.257372	0.221716	0.193647	0.160063	0.117698	0.102679	0.084712	0.068480	0.053250	0.057424	0.061840	0.071650	0.093778	0.118661	0.137834	0.199003	0.250602	0.317370	-2	0	-1	2	-6	2	7	-4	-2	-4	-5	-1	-5	-6	-4	-2	-3	-6	-5	-4	-3	-2	-2	0	-6	-1	7	-5
2	0.056007	0.058879	0.054943	0.048868	0.049080	0.047322	0.040528	0.036669	0.033633	0.024967	0.022058	0.023304	0.022790	0.020433	0.024564	0.029069	0.041031	0.056416	0.069402	0.074415	0.074451	-3	-2	-2	0	-6	0	7	-4	-2	-6	-5	-1	-4	-6	-3	-2	-3	-5	-4	-5	-4	1	8	0	-5	-2	-2	-3
2	0.094166	0.099756	0.122586	0.140096	0.158939	0.195181	0.204053	0.236265	0.263603	0.330232	0.409000	0.478844	0.535235	0.569799	0.600129	0.618508	0.653567	0.693917	0.734935	0.767553	0.789273	-2	-5	-5	-5	1	-5	-5	-5	-3	-1	1	-5	2	7	-5	-2	-2	-2	4	0	-2	1	-1	-1	-6	-1	6	-5
2	0.653567	0.693917	0.734935	0.767553	0.789273	0.797365	0.794197	0.804053	0.803900	0.814192	0.803815	0.796946	0.784100	0.762793	0.747380	0.721204	0.695381	0.671499	0.656217	0.621259	0.597276	2	-2	-2	-2	-1	1	0	-3	2	2	0	-2	-3	-1	-1	0	-1	-5	-2	3	3	-2	-1	-2	-1	1	0	0
2	0.250618	0.231182	0.214753	0.226380	0.239980	0.250177	0.246381	0.243724	0.230223	0.222454	0.233921	0.243075	0.266037	0.254139	0.270458	0.275503	0.290045	0.301613	0.303363	0.301355	0.285593	-2	-4	2	-2	-5	-4	-4	7	-4	-6	-6	-3	-5	-6	-4	-2	-4	-5	-5	-6	-1	-3	-2	6	-5	5	3	-3
2	0.222454	0.233921	0.243075	0.266037	0.254139	0.270458	0.275503	0.290045	0.301613	0.303363	0.301355	0.285593	0.287508	0.269034	0.257015	0.241098	0.229992	0.214917	0.213288	0.218404	0.248910	-3	-4	-5	-5	-4	-3	-4	-5	-4	-1	0	-4	10	-2	-5	-4	-3	-4	-3	-1	-3	0	-2	-3	-5	-1	-1	-4
2	0.301355	0.285593	0.287508	0.269034	0.257015	0.241098	0.229992	0.214917	0.213288	0.218404	0.248910	0.243436	0.249025	0.239002	0.244351	0.245356	0.257214	0.262581	0.264536	0.250357	0.236384	0	3	-2	-3	1	0	-2	-4	2	1	-1	1	-1	2	-4	-2	-2	-4	-2	3	2	-2	2	6	-4	-2	0	-2
2	0.024967	0.022058	0.023304	0.022790	0.020433	0.024564	0.029069	0.041031	0.056416	0.069402	0.074415	0.074451	0.073609	0.077110	0.084333	0.107798	0.124007	0.137020	0.146496	0.163991	0.164078	2	2	-1	0	-4	0	5	-3	-1	0	-4	1	-3	-5	-4	-2	-1	-3	-4	-2	1	0	-1	4	-5	1	4	-3
2	0.213288	0.218404	0.248910	0.243436	0.249025	0.239002	0.244351	0.245356	0.257214	0.262581	0.264536	0.250357	0.236384	0.226036	0.245667	0.281571	0.336685	0.368194	0.407820	0	0	1	-1	-1	-3	0	-2	-1	-3	5	-1	2	-2	-2	0	-3	-2	-1	-3	3	0	1	-3	-4	-5	-2	-4	-4	-4
2	0.074415	0.074451	0.073609	0.077110	0.084333	0.107798	0.124007	0.137020	0.146496	0.163991	0.164078	0.167009	0.161374	0.153851	0.135298	0.120596	0.120281	0.113728	0.103814	0.110126	0.122210	-2	1	0	1	-3	-2	-1	-2	0	-4	-4	2	-4	-4	2	4	3	-5	-4	-4	3	-4	-3	-3	-4	-3	-2	-2
2	0.291780	0.313671	0.334104	0.334223	0.319834	0.297307	0.273722	0.247580	0.251775	0.240881	0.231540	0.207893	0.196390	0.157532	0.151696	0.129649	0.143393	0.154042	0.152537	0.162540	0.188170	-1	-2	-1	0	-4	-1	2	5	-1	-4	-4	0	-4	-3	1	-2	-2	-4	-2	-2	1	-4	-1	-3	-3	-3	-2	-2
2	0.196390	0.157532	0.151696	0.129649	0.143393	0.154042	0.152537	0.162540	0.188170	0.219270	0.224066	0.239616	0.275238	0.296184	0.298196	0.329660	0.326979	0.338084	0.336467	0.356996	0.344533	6	-4	-4	-4	3	-3	-3	-1	-4	-2	-3	-3	-3	-4	-3	0	0	-5	-4	0	1	1	1	2	-5	0	4	-2
2	0.344506	0.361692	0.391478	0.370651	0.379009	0.406713	0.440001	0.449636	0.491897	0.492077	0.502682	0.524065	0.519336	0.520030	0.505026	0.502399	0.506059	0.478927	0.474663	0.454198	0.431566	-3	8	-2	-4	-6	0	-2	-5	-2	-5	-4	1	-4	-2	-4	-2	-3	-5	-2	-4	-1	1	-5	-5	-3	-3	-3	-5
2	0.440001	0.449636	0.491897	0.492077	0.502682	0.524065	0.519336	0.520030	0.505026	0.502399	0.506059	0.478927	0.474663	0.454198	0.431566	0.389543	0.367689	0.380209	0.317028	0.275877	0.229176	2	-2	-1	3	-5	0	5	-1	-2	-4	-5	1	-4	-5	-3	1	-2	-5	-4	-4	-1	-2	-1	4	-5	1	6	-3
2	0.502399	0.506059	0.478927	0.474663	0.454198	0.431566	0.389543	0.367689	0.380209	0.317028	0.275877	0.229176	0.227678	0.206338	0.196833	0.175029	0.175755	0.181254	0.189415	0.181398	0.173449	6	-4	-3	-4	0	-3	-3	0	-4	-3	-4	-3	-3	-4	-3	0	0	-5	-4	-1	-2	4	-2	-3	-2	4	-2	-3
2	0.367689	0.380209	0.317028	0.275877	0.229176	0.227678	0.206338	0.196833	0.175029	0.175755	0.181254	0.189415	0.181398	0.173449	0.133529	0.123220	0.125263	0.126011	0.129115	0.141770	0.144786	6	-4	-2	-4	0	-3	-3	-1	-4	-4	-4	-3	-3	-1	-3	2	-2	-4	-1	-2	-4	-5	-5	-5	-4	-5	-5	-5
2	0.085435	0.082375	0.086375	0.095827	0.111026	0.134170	0.149236	0.159206	0.179633	0.171902	0.155779	0.147883	0.145329	0.118850	0.123356	0.126346	0.132751	0.139373	0.159832	0.177171	0.191157	-3	8	-2	-3	-5	-1	-2	-4	-2	-4	-4	0	-3	-4	-4	-2	-3	-4	-3	-4	-3	-3	0	7	-5	-2	2	-3
2	0.252463	0.239428	0.209073	0.154718	0.130540	0.095382	0.075030	0.065032	0.064026	0.062518	0.065048	0.073336	0.076366	0.076257	0.076404	0.072087	0.061981	0.056993	0.053205	0.042054	0.034838	-2	-2	-4	-4	-3	2	-3	-3	-4	1	3	0	2	-2	-4	-3	1	-4	-3	3	-3	8	-2	-4	-5	-1	-2	-4
2	0.033796	0.040040	0.048056	0.059093	0.070709	0.073267	0.070901	0.067210	0.059894	0.051411	0.047414	0.050747	0.054178	0.058427	0.066718	0.077157	0.080827	0.091355	0.103307	0.108235	0.110350	0	-5	-5	-5	-3	-5	-5	-5	-5	6	-1	-5	-1	-3	-5	-4	-2	-5	-4	4	-2	-5	-4	-5	1	-4	-5	-5
2	0.033973	0.041251	0.042884	0.043130	0.038371	0.030369	0.023121	0.020132	0.018536	0.017082	0.015731	0.015490	0.014233	0.013558	0.012908	0.012006	0.010646	0.010845	0.011317	0.013534	0.017442	-1	-4	-5	-5	-2	-4	-4	-5	-5	4	0	-4	1	-2	-4	-3	-2	-4	-3	6	-3	-2	-2	0	-5	0	7	-4
2	0.029501	0.029740	0.031041	0.033891	0.036514	0.043755	0.053634	0.060984	0.068036	0.072151	0.073053	0.078631	0.086215	0.109798	0.153551	0.200053	0.259840	0.323479	0.369072	0.444754	0.507520	-2	-3	-2	-3	-3	-3	-3	-4	-4	-3	-3	-3	-3	-4	-3	0	7	-4	-4	-2	-3	-2	-2	-1	-5	0	7	-4
2	0.047414	0.050747	0.054178	0.058427	0.066718	0.077157	0.080827	0.091355	0.103307	0.108235	0.110350	0.121242	0.120387	0.117310	0.109985	0.122024	0.123420	0.149853	0.182026	0.202032	0.223184	1	4	-2	-1	-4	2	1	-1	-1	-5	-4	4	-3	-5	-1	0	-1	-5	-4	-4	-1	-3	-2	-3	-2	-3	-3	-3
2	0.049809	0.033689	0.026320	0.019807	0.016835	0.013444	0.012533	0.012996	0.013047	0.011975	0.012999	0.015120	0.017051	0.018702	0.024912	0.031384	0.040394	0.053735	0.070518	0.076617	0.081839	-3	-5	-5	-6	-4	-5	-5	-6	-5	7	-1	-5	0	1	-4	-4	-3	-5	-3	4	-2	-4	-3	-3	-4	-2	-3	-3
2	0.091170	0.097957	0.096886	0.085268	0.076371	0.070322	0.072490	0.092009	0.113156	0.127259	0.149992	0.161554	0.165033	0.159742	0.150584	0.138738	0.120467	0.101316	0.089123	0.080861	0.072975	0	-3	-1	2	-5	-1	0	0	0	-4	-4	-3	-4	-4	7	-1	-1	-5	-3	-4	-4	-5	-5	-6	-5	-5	-5	-5
2	0.091355	0.103307	0.108235	0.110350	0.121242	0.120387	0.117310	0.109985	0.122024	0.123420	0.149853	0.182026	0.202032	0.223184	0.251163	0.269969	0.296166	0.339163	0.390401	0.435849	0.504137	-3	-1	-1	2	-5	0	5	-4	3	-4	-4	1	-4	-3	-3	-2	1	-1	2	-4	4	-3	-3	-2	-4	2	5	-3
2	0.096524	0.136672	0.201214	0.253219	0.313086	0.379002	0.418626	0.422964	0.422510	0.456635	0.460639	0.466020	0.481357	0.454857	0.378703	0.290370	0.218106	0.149661	0.105065	0.074160	0.063994	-1	-3	-1	5	-6	1	4	0	-2	-5	-5	-2	-2	-6	-1	-2	-2	-6	-5	-4	0	-1	1	2	-5	2	4	-3
2	0.422964	0.422510	0.456635	0.460639	0.466020	0.481357	0.454857	0.378703	0.290370	0.218106	0.149661	0.105065	0.074160	0.063994	0.058634	0.057598	0.060947	0.083129	0.107378	0.136964	0.187283	1	0	2	3	-2	3	1	-4	0	-2	-2	2	-4	-3	-4	-1	0	-5	-4	-2	0	-2	-2	-3	-4	0	-1	-3
2	0.083129	0.107378	0.136964	0.187283	0.241023	0.316182	0.391257	0.460253	0.538236	0.613477	0.642960	0.693818	0.711263	0.666301	0.649394	0.692165	0.674974	0.665466	0.694588	0.708409	0.687825	0	-3	4	5	-5	-2	4	-3	2	-5	-3	-2	-3	-5	-4	-2	-1	-6	-3	-5	-2	-3	-4	-5	-3	-4	-5	-5
2	0.241023	0.316182	0.391257	0.460253	0.538236	0.613477	0.642960	0.693818	0.711263	0.666301	0.649394	0.692165	0.674974	0.665466	0.694588	0.708409	0.687825	0.747586	0.763386	0.779168	0.807302	-3	-1	8	-1	-5	-2	-3	-3	0	-5	-6	-1	-4	-5	-4	0	-2	-6	-2	-5	0	0	-1	-3	-4	-2	-2	6
2	0	0	0	0	0	0	0.404169	0.368059	0.355439	0.247762	0.174300	0.134160	0.090245	0.062681	0.044913	0.037899	0.036106	0.033612	0.032027	0.028988	0.028881	0	0	0	0	0	0	0	0	0	0	0	0	0	0	0	0	0	0	0	0	0	0	0	0	0	0	0	0
2	0.779168	0.807302	0.790423	0.761473	0.717838	0.675601	0.671327	0.665342	0.630544	0.648795	0.620265	0.592877	0.563945	0.516760	0.476731	0.438216	0.377007	0.307901	0.260958	0.221267	0.200155	-1	1	-3	0	-3	-1	1	-4	1	0	0	2	-3	-4	1	-1	0	-5	-2	3	-2	-1	-1	-4	-4	-1	-1	-5
2	0.717838	0.675601	0.671327	0.665342	0.630544	0.648795	0.620265	0.592877	0.563945	0.516760	0.476731	0.438216	0.377007	0.307901	0.260958	0.221267	0.200155	0.201893	0.196543	0.211125	0.236357	1	-3	-3	2	-3	-2	-2	-3	0	2	0	1	-2	1	1	0	-1	-5	-1	2	-1	-1	2	4	-4	-1	0	-3
2	0.516760	0.476731	0.438216	0.377007	0.307901	0.260958	0.221267	0.200155	0.201893	0.196543	0.211125	0.236357	0.250367	0.242331	0.228896	0.213856	0.178174	0.143769	0.129027	0.124178	0.109261	0	-4	-3	0	-4	-3	-3	-4	-4	-3	-1	-3	-1	1	-1	2	5	7	0	-3	-3	6	-3	-3	-5	0	-2	-4
2	0.476731	0.438216	0.377007	0.307901	0.260958	0.221267	0.200155	0.201893	0.196543	0.211125	0.236357	0.250367	0.242331	0.228896	0.213856	0.178174	0.143769	0.129027	0.124178	0.109261	0.105700	-3	6	-3	-3	-5	0	-2	-4	-3	-4	-4	4	-3	-4	-4	-3	-3	-4	-1	0	-1	0	2	4	-3	5	0	-3
2	0.211125	0.236357	0.250367	0.242331	0.228896	0.213856	0.178174	0.143769	0.129027	0.124178	0.109261	0.105700	0.105349	0.099934	0.095343	0.096842	0.092264	0.085834	0.082937	0.076906	0.078391	0	-1	-2	2	-4	2	4	-3	-2	1	-3	1	-3	-4	-2	-1	-2	-4	-3	-2	3	-2	-3	-2	-4	-1	-1	4
2	0.111999	0.105665	0.110147	0.114634	0.119660	0.111691	0.102046	0.092950	0.079001	0.060791	0.048385	0.041758	0.044929	0.061089	0.077284	0.088735	0.097090	0.090695	0.076793	0.061019	0.049610	0	-4	-3	-3	-3	-4	-4	7	-4	-4	-1	-3	-4	-4	-4	-2	-3	-4	-4	-4	-4	-3	1	-4	-4	-3	-4	-5
2	0.079001	0.060791	0.048385	0.041758	0.044929	0.061089	0.077284	0.088735	0.097090	0.090695	0.076793	0.061019	0.049610	0.034329	0.023972	0.015209	0.010984	0.008146	0.007168	0.007068	0.008216	1	-4	-5	-5	-3	-4	-4	-5	-5	1	3	-4	-1	-3	-4	-3	-2	-5	-3	5	-3	-4	-4	-5	0	-4	-4	-5
2	0.089264	0.106344	0.110804	0.107501	0.099526	0.081826	0.064779	0.055878	0.049349	0.042593	0.037094	0.033641	0.026388	0.022695	0.019452	0.017590	0.015563	0.021046	0.035826	0.056825	0.090053	1	-3	-4	-4	-3	-3	-3	-4	-5	-1	1	-2	-1	-2	5	-3	-2	-5	-4	4	4	1	-3	-4	1	-3	-3	3
2	0.056825	0.090053	0.136315	0.187551	0.248573	0.313133	0.335033	0.350199	0.376976	0.357867	0.319151	0.273539	0.247939	0.189210	0.142468	0.110346	0.088421	0.063665	0.061494	0.078095	0.106071	-1	-2	-2	-2	-3	0	-2	-3	-3	-3	-3	-2	-2	-4	-3	3	6	-4	-3	-2	-1	-3	-2	-2	-3	-2	-3	6
2	0.248573	0.313133	0.335033	0.350199	0.376976	0.357867	0.319151	0.273539	0.247939	0.189210	0.142468	0.110346	0.088421	0.063665	0.061494	0.078095	0.106071	0.141726	0.186346	0.210317	0.214738	0	-3	-2	-2	-2	-2	-3	-3	-2	-1	4	-3	1	0	-3	2	0	-3	-1	1	-2	-3	3	6	-4	-1	0	1
2	0.110346	0.088421	0.063665	0.061494	0.078095	0.106071	0.141726	0.186346	0.210317	0.214738	0.199318	0.169202	0.124696	0.092502	0.067242	0.054818	0.048498	0.051828	0.050113	0.046055	0.038485	-2	-3	-3	-4	-4	-3	-3	-4	5	-3	-3	-3	-3	1	-4	-3	-3	0	8	-3	-4	-4	-4	-5	-5	-4	-4	-5
2	0.048498	0.051828	0.050113	0.046055	0.038485	0.031487	0.025596	0.024992	0.028636	0.035709	0.047158	0.058947	0.064109	0.069281	0.071018	0.072954	0.076870	0.111118	0.149508	0.178765	0.204452	-3	-4	-5	-6	-3	-4	-5	-6	-5	3	5	-5	0	-1	-5	-4	-1	-4	-3	0	4	-4	-3	-4	4	-3	-4	5
2	0.031487	0.025596	0.024992	0.028636	0.035709	0.047158	0.058947	0.064109	0.069281	0.071018	0.072954	0.076870	0.111118	0.149508	0.178765	0.204452	0.226182	0.202282	0.175277	0.166136	0.153391	-3	-3	-4	-5	-3	-2	-4	-5	-4	-1	0	-3	10	-2	-5	-4	-3	-4	-3	-1	6	-3	-3	-3	-2	-3	-3	-1
2	0.035709	0.047158	0.058947	0.064109	0.069281	0.071018	0.072954	0.076870	0.111118	0.149508	0.178765	0.204452	0.226182	0.202282	0.175277	0.166136	0.153391	0.132752	0.135267	0.134028	0.122864	-3	-4	-5	-5	6	-4	-5	-5	-4	-1	5	-4	2	-1	-4	-4	-3	-3	-3	-1	-3	3	-2	-3	-5	-1	-1	-3
2	0.213120	0.186116	0.167109	0.152454	0.143241	0.123616	0.122239	0.120214	0.121971	0.127871	0.116327	0.113941	0.117947	0.119722	0.106832	0.100284	0.090383	0.082449	0.073396	0.067132	0.061349	-4	-4	-6	-6	-3	-4	-5	-6	-5	0	6	-5	0	-2	-5	-5	-3	-4	-3	-1	0	-2	6	4	-5	-1	-2	-1
2	0.036667	0.060889	0.089866	0.107594	0.141928	0.177701	0.206854	0.230848	0.263769	0.285817	0.297734	0.314446	0.336295	0.325196	0.312804	0.291870	0.258276	0.202108	0.213179	0.198894	0.196628	-1	1	-1	-1	-4	0	0	0	1	-4	1	2	-1	-4	4	0	-1	-5	-3	-3	-3	-3	-3	-5	-3	1	-3	-5
2	0.196628	0.195356	0.236037	0.235885	0.251315	0.273795	0.320987	0.332278	0.355713	0.393118	0.424876	0.442634	0.465810	0.423413	0.393563	0.353282	0.322957	0.289701	0.282259	0.272814	0.245119	-1	-2	-2	-1	-5	2	7	0	-2	-5	-5	-1	-4	-5	-3	-2	-3	-5	-4	-4	-3	-4	-5	-5	-3	-3	-5	-5
2	0.113493	0.109221	0.097886	0.085464	0.076132	0.066035	0.070096	0.071519	0.089147	0.107045	0.122223	0.131898	0.133389	0.123592	0.120236	0.104956	0.098728	0.099712	0.114414	0.119270	0.125138	1	2	-2	3	-5	1	3	1	-1	-2	-3	0	-4	-5	-4	-2	0	-5	-2	-1	4	-4	-4	-4	-2	-3	-4	-3
2	0.070096	0.071519	0.089147	0.107045	0.122223	0.131898	0.133389	0.123592	0.120236	0.104956	0.098728	0.099712	0.114414	0.119270	0.125138	0.127166	0.151267	0.189385	0.200586	0.215108	0.234158	-1	-3	-2	-3	-4	-3	-3	7	-3	-4	-4	-3	-4	-4	-3	-2	-3	-4	-4	-4	-4	3	1	7	-6	-2	-1	-4
2	0.656015	0.655463	0.645752	0.629302	0.589973	0.548858	0.519457	0.525812	0.555123	0.536133	0.563925	0.569516	0.572483	0.574239	0.582512	0.574202	0.586526	0.592258	0.604880	0.603328	0.598511	1	-2	0	6	-4	-2	0	-3	-3	-4	-5	-3	-4	-2	-2	3	0	-5	-4	-3	-3	-3	-5	-6	-1	-5	-5	-5
2	0.586526	0.592258	0.604880	0.603328	0.598511	0.603777	0.615493	0.624329	0.630394	0.618783	0.652139	0.674730	0.689701	0.696581	0.726867	0.742345	0.751747	0.755508	0.756376	0.762968	0.762102	-1	-4	-4	-4	-4	-3	-3	-4	-4	-4	0	-3	-1	-5	8	-2	-3	-5	-4	-4	-2	-4	-4	-3	-5	-2	-1	-4
2	0.592258	0.604880	0.603328	0.598511	0.603777	0.615493	0.624329	0.630394	0.618783	0.652139	0.674730	0.689701	0.696581	0.726867	0.742345	0.751747	0.755508	0.756376	0.762968	0.762102	0.762855	-2	-4	-4	-3	-5	-2	-1	-4	4	-3	-3	-2	-1	-1	6	-3	-2	-3	5	0	-1	-1	-1	-2	-3	0	-3	6
2	0.598511	0.603777	0.615493	0.624329	0.630394	0.618783	0.652139	0.674730	0.689701	0.696581	0.726867	0.742345	0.751747	0.755508	0.756376	0.762968	0.762102	0.762855	0.751482	0.736622	0.720095	-4	-5	-5	-6	-4	-5	-5	-5	-4	-2	-2	-5	-2	8	-6	-5	-4	8	1	-1	-2	-4	0	-3	-5	-3	-3	-4
2	0.624329	0.630394	0.618783	0.652139	0.674730	0.689701	0.696581	0.726867	0.742345	0.751747	0.755508	0.756376	0.762968	0.762102	0.762855	0.751482	0.736622	0.720095	0.685848	0.660142	0.651851	0	-2	-2	3	0	-1	2	-2	-3	-5	-4	2	-4	-5	6	-2	-2	-5	-5	-4	-4	-4	-5	-6	-4	-4	-5	-6
2	0.756376	0.762968	0.762102	0.762855	0.751482	0.736622	0.720095	0.685848	0.660142	0.651851	0.619986	0.598346	0.591772	0.594451	0.575300	0.557066	0.524813	0.523115	0.531965	0.525853	0.529492	1	3	-3	-3	-4	-2	-2	-3	-1	-3	-4	1	-2	-4	6	-2	-2	-5	-3	-1	-2	-3	-1	-4	-3	-3	-3	-4
2	0.651851	0.619986	0.598346	0.591772	0.594451	0.575300	0.557066	0.524813	0.523115	0.531965	0.525853	0.529492	0.555646	0.572632	0.579449	0.577374	0.566386	0.542025	0.526859	0.494948	0.465436	-1	-4	-5	-4	-3	-3	-4	-5	-5	1	5	-3	4	-2	-5	-4	-2	-4	-3	-1	0	-2	-2	1	-5	0	3	-2
2	0.594451	0.575300	0.557066	0.524813	0.523115	0.531965	0.525853	0.529492	0.555646	0.572632	0.579449	0.577374	0.566386	0.542025	0.526859	0.494948	0.465436	0.430587	0.405483	0.353752	0.303039	-3	-3	2	7	-5	-2	0	-3	-3	-5	-5	-2	-5	-5	-2	-2	-2	-6	-5	-5	-2	-3	-5	-5	-4	-3	-3	-4
2	0.575300	0.557066	0.524813	0.523115	0.531965	0.525853	0.529492	0.555646	0.572632	0.579449	0.577374	0.566386	0.542025	0.526859	0.494948	0.465436	0.430587	0.405483	0.353752	0.303039	0.260964	-2	-3	-5	-5	-4	-3	-3	-4	-3	0	3	-4	2	7	-5	-3	-3	-1	-1	-1	2	-2	-1	4	-4	0	4	-2
2	0.353752	0.303039	0.260964	0.208237	0.175779	0.159152	0.139801	0.138490	0.153384	0.154646	0.144390	0.141626	0.147253	0.134388	0.132113	0.139247	0.154718	0.175625	0.228715	0.257801	0.269124	-2	3	-2	0	4	2	4	-4	-1	-4	-3	1	-3	0	-3	-2	-1	-3	-1	-2	-1	-2	0	6	-5	0	4	-2
2	0.182067	0.151296	0.130986	0.123195	0.121247	0.138611	0.147942	0.162370	0.164006	0.176328	0.152926	0.131000	0.101042	0.078954	0.049008	0.038842	0.038560	0.045797	0.060665	0.088053	0.118191	-1	-2	-2	-3	-2	-2	-2	-3	-3	0	-1	-2	-1	-2	-2	-1	4	-3	-2	4	-1	-2	1	-1	-3	0	4	-3
2	0.045797	0.060665	0.088053	0.118191	0.149376	0.168395	0.189584	0.181448	0.167978	0.143850	0.125838	0.105742	0.101690	0.094604	0.094836	0.096391	0.100963	0.117032	0.147539	0.199681	0.279439	-3	-3	-3	-4	-4	-2	-3	-4	1	-2	-2	-3	-2	2	-4	-3	-3	1	8	-2	-2	1	-1	2	-4	0	3	-3
2	0.253168	0.270371	0.284439	0.297365	0.289527	0.291354	0.284231	0.263871	0.229477	0.197631	0.156573	0.120041	0.088870	0.072136	0.071240	0.080298	0.086793	0.098525	0.100709	0.110044	0.117607	-2	-2	5	-1	-3	-2	-2	-2	-2	0	-2	-2	-1	-3	-3	-1	1	-4	-3	4	-2	-1	-2	-2	-4	6	0	-3
2	0.601745	0.581854	0.561558	0.549148	0.538251	0.541621	0.541880	0.547839	0.564370	0.585708	0.605903	0.625892	0.639480	0.656815	0.664325	0.679211	0.690331	0.703175	0.700502	0.698664	0.689446	-1	2	0	-1	-3	1	1	-2	-1	-3	-3	5	-2	-3	-1	0	-1	-3	-2	-3	-2	-2	1	6	-4	0	1	-2
2	0.561558	0.549148	0.538251	0.541621	0.541880	0.547839	0.564370	0.585708	0.605903	0.625892	0.639480	0.656815	0.664325	0.679211	0.690331	0.703175	0.700502	0.698664	0.689446	0.675886	0.662954	4	-2	-1	-2	-1	-1	-1	0	-2	-2	-2	-1	-1	-3	-1	2	0	-3	-2	-1	-2	-2	1	6	-4	0	1	-2
2	0.337017	0.299578	0.245742	0.210319	0.179567	0.165914	0.140563	0.170701	0.198216	0.211417	0.255024	0.267321	0.276797	0.310811	0.336244	0.356045	0.374328	0.403962	0.402689	0.386381	0.394196	-3	-2	5	6	-4	-1	0	0	-1	-4	-5	-1	-4	-4	-3	-1	-2	-5	-4	-4	-1	-3	-1	-2	-4	-3	-3	7
2	0.245742	0.210319	0.179567	0.165914	0.140563	0.170701	0.198216	0.211417	0.255024	0.267321	0.276797	0.310811	0.336244	0.356045	0.374328	0.403962	0.402689	0.386381	0.394196	0.385643	0.400849	-1	5	-1	-2	-4	-1	-2	5	-2	-5	-4	0	-3	-4	-3	-1	-2	-4	-4	-4	-2	-3	-3	-3	-3	-3	-3	-4
2	0.198216	0.211417	0.255024	0.267321	0.276797	0.310811	0.336244	0.356045	0.374328	0.403962	0.402689	0.386381	0.394196	0.385643	0.400849	0.355015	0.349426	0.349112	0.336961	0.347324	0.341069	-2	-3	-2	-3	-2	-3	-3	-4	-3	4	0	-3	2	-2	-3	-1	4	-4	-2	1	-2	-3	-4	-4	-2	-3	-3	-4
2	0.352675	0.314240	0.310030	0.288403	0.287413	0.268211	0.293296	0.264281	0.254746	0.283454	0.276106	0.296969	0.332538	0.362000	0.374708	0.386944	0.392301	0.378291	0.379685	0.370249	0.341157	-2	-1	-1	4	-4	1	5	-3	-2	-3	-4	2	-3	-4	-2	-1	-2	-4	-3	-1	-2	5	-2	-3	3	-1	-2	0
2	0.287413	0.268211	0.293296	0.264281	0.254746	0.283454	0.276106	0.296969	0.332538	0.362000	0.374708	0.386944	0.392301	0.378291	0.379685	0.370249	0.341157	0.320135	0.284552	0.235627	0.190752	-1	-2	-3	-3	-3	-2	2	-4	-1	-1	2	0	-1	4	-3	-2	-2	-1	4	-2	0	-3	-3	-3	3	-3	-3	-3
2	0.276106	0.296969	0.332538	0.362000	0.374708	0.386944	0.392301	0.378291	0.379685	0.370249	0.341157	0.320135	0.284552	0.235627	0.190752	0.156449	0.124925	0.127125	0.144239	0.166078	0.177176	-2	4	4	1	-4	0	0	-3	1	-4	-4	3	-3	-3	-3	-1	-1	-3	1	-3	0	6	-1	-2	-4	0	-1	-3
2	0.166078	0.177176	0.188749	0.181800	0.157496	0.132018	0.117945	0.105443	0.126298	0.139196	0.155469	0.171641	0.204222	0.203849	0.203817	0.213949	0.220196	0.207159	0.215233	0.220959	0.207837	2	-3	0	6	-3	-2	0	1	-2	-4	-4	-2	-3	-4	2	0	-2	-5	-4	-3	-2	-2	0	5	-3	-1	1	-3
2	0.212675	0.208425	0.217262	0.221488	0.219794	0.223718	0.224392	0.216666	0.214433	0.212699	0.206959	0.212894	0.219085	0.238395	0.256492	0.311929	0.381158	0.425141	0.477851	0.558298	0.613236	3	-3	-3	-4	-2	-2	-3	0	-3	0	2	-2	6	-2	-3	-1	-2	-3	-2	-1	3	-3	-3	-3	-2	-2	-2	0
2	0.650212	0.584724	0.500999	0.429096	0.346056	0.277693	0.230860	0.217237	0.203859	0.216051	0.218569	0.226305	0.232476	0.228993	0.225990	0.226158	0.225942	0.243232	0.241520	0.238520	0.233578	-2	0	3	-1	-3	3	0	-3	0	1	-2	3	1	-3	1	0	-1	-4	-3	0	-3	5	-1	-3	-4	0	-1	-3
2	0.689446	0.675886	0.662954	0.651522	0.649768	0.640469	0.658500	0.679157	0.692247	0.705183	0.698883	0.694151	0.687852	0.682823	0.695145	0.693362	0.719919	0.748377	0.772557	0.785979	0.798610	1	-1	1	0	-1	0	0	0	-1	-3	-3	0	-2	-3	-1	4	1	-3	-2	-2	0	-3	-3	-3	-1	-2	-3	-3
2	0.238520	0.233578	0.214937	0.196897	0.196352	0.190365	0.197119	0.217813	0.231407	0.249308	0.293090	0.345248	0.383359	0.415295	0.465416	0.492057	0.515609	0.509632	0.458759	0.396198	0.341289	-1	-2	-1	-2	-4	-1	-2	5	7	-5	-4	-2	-3	-3	-3	0	-2	-4	-1	-4	-2	-4	-4	-4	-2	-4	-4	-5
2	0.231407	0.249308	0.293090	0.345248	0.383359	0.415295	0.465416	0.492057	0.515609	0.509632	0.458759	0.396198	0.341289	0.307481	0.297048	0.339663	0.364022	0.378881	0.404826	0.438739	0.474021	-2	-3	-4	-4	-3	-3	-4	-4	0	0	-1	-3	-1	4	-4	-3	-2	-1	5	4	-1	-3	-1	-2	-4	-3	-3	7
2	0.675886	0.662954	0.651522	0.649768	0.640469	0.658500	0.679157	0.692247	0.705183	0.698883	0.694151	0.687852	0.682823	0.695145	0.693362	0.719919	0.748377	0.772557	0.785979	0.798610	0.807704	0	-3	-3	-3	-1	-2	-3	-3	-3	3	1	-3	1	-1	-3	-2	0	-3	-1	4	-1	0	-1	-1	-3	5	1	-2
2	0.438739	0.474021	0.460827	0.452992	0.419542	0.373089	0.371335	0.392566	0.411567	0.420059	0.407561	0.355992	0.295507	0.248405	0.209701	0.188264	0.175977	0.182010	0.177368	0.168982	0.164655	-3	-2	3	6	-4	-1	1	-2	-2	-4	-5	-2	-4	-5	-1	-1	-2	-5	-4	-4	1	2	-2	-2	-3	-1	2	-2
2	0.266575	0.290956	0.293744	0.303928	0.301376	0.308485	0.347796	0.410770	0.471139	0.552269	0.605770	0.631297	0.648926	0.636878	0.605959	0.556356	0.497937	0.442207	0.359209	0.315814	0.295945	-3	-2	3	-2	-3	1	-2	-3	-2	0	4	-2	2	-1	-4	-2	-2	-3	-2	-1	-1	-1	-1	-2	-3	5	0	-3
2	0.301376	0.308485	0.347796	0.410770	0.471139	0.552269	0.605770	0.631297	0.648926	0.636878	0.605959	0.556356	0.497937	0.442207	0.359209	0.315814	0.295945	0.286224	0.278544	0.308763	0.290231	-1	-3	-1	-2	-3	-3	-3	6	-3	-5	-5	-2	-4	-4	-3	0	-2	-4	-4	-4	-1	-3	-1	-2	-4	-3	-3	7
2	0.359209	0.315814	0.295945	0.286224	0.278544	0.308763	0.290231	0.277740	0.271875	0.262788	0.268931	0.287881	0.320785	0.342317	0.377301	0.424565	0.463846	0.517295	0.567104	0.586324	0.585168	-1	0	-2	-3	-2	-2	-2	-3	-3	3	-1	1	-1	-2	-3	-1	4	-4	-3	1	4	-2	-1	-2	-2	-1	-2	-1
2	0.286224	0.278544	0.308763	0.290231	0.277740	0.271875	0.262788	0.268931	0.287881	0.320785	0.342317	0.377301	0.424565	0.463846	0.517295	0.567104	0.586324	0.585168	0.579445	0.579981	0.557011	-1	7	-1	-1	-4	0	-1	-1	-1	-4	-3	1	-3	-4	-3	-2	-2	-4	-3	-4	-2	-1	-2	-2	-3	6	0	-4
2	0.579445	0.579981	0.557011	0.529548	0.492923	0.447118	0.406881	0.385958	0.379726	0.366298	0.341799	0.334464	0.321231	0.290646	0.268920	0.267483	0.249449	0.220685	0.206455	0.217698	0.195720	-1	-1	-1	-1	-2	0	3	-2	-1	-2	0	-1	-1	0	-1	2	-1	-1	4	-1	0	-1	-2	-2	-2	0	-1	2
2	0.406881	0.385958	0.379726	0.366298	0.341799	0.334464	0.321231	0.290646	0.268920	0.267483	0.249449	0.220685	0.206455	0.217698	0.195720	0.220155	0.243350	0.269932	0.290088	0.311277	0.312605	-1	3	-3	-3	-3	2	-1	-4	-3	3	0	-1	0	-2	-3	-2	0	-4	-3	3	-1	-1	0	4	-5	1	5	-3
2	0.268920	0.267483	0.249449	0.220685	0.206455	0.217698	0.195720	0.220155	0.243350	0.269932	0.290088	0.311277	0.312605	0.324869	0.318327	0.318087	0.327043	0.337764	0.359102	0.385667	0.414771	-1	-2	-2	0	-5	0	6	-3	-2	-4	-4	-1	-3	-5	4	-1	-2	-4	-3	-4	-3	-4	-5	-5	-3	-4	-4	-5
2	0.290088	0.311277	0.312605	0.324869	0.318327	0.318087	0.327043	0.337764	0.359102	0.385667	0.414771	0.444768	0.469821	0.501463	0.523181	0.561333	0.602112	0.658230	0.676515	0.668885	0.672550	-1	-1	2	-1	-4	1	3	2	2	-4	-4	3	-3	-4	-2	0	-2	-4	-3	-4	-3	-2	1	7	-4	-1	1	-2
2	0.312605	0.324869	0.318327	0.318087	0.327043	0.337764	0.359102	0.385667	0.414771	0.444768	0.469821	0.501463	0.523181	0.561333	0.602112	0.658230	0.676515	0.668885	0.672550	0.659158	0.634569	5	-2	-2	-2	-1	-2	-2	0	-2	-2	-2	-1	-2	-3	-2	1	-1	-3	-3	-1	-3	-2	1	7	-4	-1	1	-2
2	0.672550	0.659158	0.634569	0.632148	0.643482	0.669200	0.698069	0.719526	0.742380	0.735820	0.758737	0.810691	0.813652	0.812889	0	0	0	0	0	0	0	1	-1	0	-1	-1	0	0	-1	-1	-3	-3	0	-2	-3	-1	5	1	-3	-2	-2	1	-3	-3	-3	-1	-2	-2	-3
2	0.659158	0.634569	0.632148	0.643482	0.669200	0.698069	0.719526	0.742380	0.735820	0.758737	0.810691	0.813652	0.812889	0	0	0	0	0	0	0	0	1	-3	-3	-3	-1	-2	-2	-3	-3	2	0	-2	0	-1	-2	-1	0	-3	-2	4	-1	0	-1	-1	-3	5	1	-3
2	0.483114	0.465006	0.451762	0.448545	0.467993	0.482486	0.487312	0.483822	0.451657	0.404179	0.340806	0.281110	0.233626	0.195056	0.165192	0.146631	0.138857	0.130631	0.123343	0.117283	0.117019	-2	0	3	5	-4	0	0	-2	-2	-4	-4	4	-3	-4	-2	-1	-2	-4	-3	-4	-2	-3	-4	-4	-2	-2	-3	-4
2	0.448545	0.467993	0.482486	0.487312	0.483822	0.451657	0.404179	0.340806	0.281110	0.233626	0.195056	0.165192	0.146631	0.138857	0.130631	0.123343	0.117283	0.117019	0.123396	0.136762	0.171667	-3	-3	-4	-5	-3	-3	-4	-5	-1	0	4	-3	0	1	-4	-3	-2	0	6	-1	-2	0	0	2	-4	0	-1	-3
2	0	0	0.714601	0.703817	0.689488	0.671447	0.663223	0.659344	0.656957	0.638855	0.601745	0.581854	0.561558	0.549148	0.538251	0.541621	0.541880	0.547839	0.564370	0.585708	0.605903	0	0	0	0	0	0	0	0	0	0	0	0	0	0	0	0	0	0	0	0	0	0	0	0	0	0	0	0
2	0.008264	0.010786	0.015413	0.027097	0.043448	0.073167	0.104142	0.128834	0.159943	0.179814	0.178215	0.168592	0.171521	0.153615	0.149263	0.160363	0.165928	0.154794	0.138047	0.113501	0.082102	-4	-5	-5	-6	-3	-2	-5	-6	4	-3	-2	-5	8	6	-6	-5	-4	-3	1	-3	2	-4	-5	-5	4	-4	-4	-2
2	0.010786	0.015413	0.027097	0.043448	0.073167	0.104142	0.128834	0.159943	0.179814	0.178215	0.168592	0.171521	0.153615	0.149263	0.160363	0.165928	0.154794	0.138047	0.113501	0.082102	0.061584	2	-4	-5	-5	4	-4	-4	-2	-3	-3	-4	-4	-4	-3	7	-3	-3	-6	-5	2	-2	-3	5	-3	0	-2	-3	-4
2	0.179814	0.178215	0.168592	0.171521	0.153615	0.149263	0.160363	0.165928	0.154794	0.138047	0.113501	0.082102	0.061584	0.047268	0.040019	0.033086	0.024779	0.017043	0.009560	0.006597	0.004530	-3	-3	1	1	-4	-4	-4	-4	-2	0	4	-4	1	-2	-3	0	3	-3	-1	1	1	1	-4	-1	-3	1	0	-2
2	0.153615	0.149263	0.160363	0.165928	0.154794	0.138047	0.113501	0.082102	0.061584	0.047268	0.040019	0.033086	0.024779	0.017043	0.009560	0.006597	0.004530	0.003322	0.002860	0.003732	0.008140	-3	-5	-6	-7	-5	-5	-5	-6	-5	2	4	-6	2	4	-6	-5	-4	-2	3	2	1	0	0	4	-6	2	4	-4
2	0.050485	0.062299	0.071199	0.085658	0.107828	0.133197	0.154881	0.172024	0.184982	0.187569	0.179735	0.163357	0.145972	0.122211	0.094106	0.072113	0.055143	0.040128	0.030605	0.026346	0.021605	0	-3	-2	-1	-3	-2	-2	2	-3	0	-1	-3	1	0	1	-2	-2	8	0	1	-2	-1	5	2	-3	-1	-2	-1
2	0.040128	0.030605	0.026346	0.021605	0.020424	0.021601	0.026233	0.033918	0.043818	0.060915	0.086317	0.109321	0.155288	0.209932	0.261140	0.295083	0.334400	0.353616	0.333588	0.294250	0.261897	0	-5	-6	-6	4	-5	-5	-6	-2	4	-1	-5	0	-4	-4	-4	-1	-5	0	5	1	-1	4	-4	4	-3	-4	-2
2	0.333588	0.294250	0.261897	0.216671	0.163863	0.164386	0.182614	0.191758	0.215349	0.233641	0.211854	0.187879	0.172177	0.129978	0.091594	0.068927	0.058258	0.043612	0.043820	0.048663	0.050483	1	-1	-1	2	-3	-1	3	3	-1	-5	-4	-2	-3	-3	-2	1	-1	-2	0	-3	-1	-2	-2	2	-5	3	4	-1
2	0.051457	0.055686	0.058674	0.058388	0.067867	0.079535	0.090088	0.120577	0.193132	0.283321	0.376305	0.453235	0.523875	0.533242	0.510207	0.465629	0.442823	0.398499	0.382529	0.337957	0.296143	-4	-2	-3	-1	-7	0	8	-4	-1	-6	-6	-2	-5	-6	-4	-3	-4	-6	-5	-6	-3	-4	7	5	-6	-2	-1	-3
2	0.055686	0.058674	0.058388	0.067867	0.079535	0.090088	0.120577	0.193132	0.283321	0.376305	0.453235	0.523875	0.533242	0.510207	0.465629	0.442823	0.398499	0.382529	0.337957	0.296143	0.254258	-3	-4	7	5	-6	-2	-1	-3	-2	-6	-5	-3	-4	-6	-5	-1	-2	-7	-5	-5	0	-4	1	2	-5	0	3	4
2	0.025507	0.026019	0.023542	0.026889	0.038100	0.049002	0.068285	0.102307	0.147171	0.171881	0.216492	0.240632	0.236045	0.205930	0.182287	0.136700	0.098508	0.076188	0.057426	0.043028	0.031204	0	-4	-5	-6	5	-4	-5	-4	-5	-1	2	-5	-2	1	-5	-3	0	-5	-3	5	-4	-2	-1	-4	-6	-1	-3	-4
2	0.102307	0.147171	0.171881	0.216492	0.240632	0.236045	0.205930	0.182287	0.136700	0.098508	0.076188	0.057426	0.043028	0.031204	0.022830	0.015970	0.013062	0.010974	0.008801	0.007386	0.005392	4	-4	-4	-4	-2	-3	2	3	-4	-5	-4	-3	-4	-5	-2	2	-1	-5	-5	-2	2	-5	-5	-5	-4	-4	-5	-2
2	0.030120	0.030065	0.029405	0.028685	0.026182	0.020031	0.015064	0.013837	0.013915	0.017546	0.026844	0.042230	0.074156	0.111880	0.171414	0.229281	0.289229	0.348436	0.378037	0.368199	0.374853	-1	0	-4	-4	-2	0	0	-1	-2	1	0	-1	0	5	-5	-2	0	1	3	1	-1	2	-1	0	-1	2	2	-5
2	0.005838	0.008648	0.011887	0.016541	0.027551	0.045936	0.072332	0.116612	0.156382	0.182157	0.207822	0.210859	0.188051	0.153800	0.123339	0.083286	0.054792	0.034461	0.029704	0.030371	0.032071	-2	-4	-2	-5	-5	-4	-4	-2	8	-4	-4	-4	-4	0	-5	0	-4	-1	7	-5	-2	-5	-6	-7	-3	-5	-6	-7
2	0.116612	0.156382	0.182157	0.207822	0.210859	0.188051	0.153800	0.123339	0.083286	0.054792	0.034461	0.029704	0.030371	0.032071	0.037418	0.040097	0.045148	0.051373	0.052281	0.050312	0.047826	0	-2	-1	5	0	0	1	-3	4	-1	-2	-1	-3	-2	-4	-2	-2	-2	2	0	-2	-4	-3	-5	1	-3	-4	-5
2	0.034461	0.029704	0.030371	0.032071	0.037418	0.040097	0.045148	0.051373	0.052281	0.050312	0.047826	0.043618	0.043313	0.043758	0.043081	0.046091	0.046166	0.038362	0.032964	0.029506	0.025376	1	1	1	-3	-1	-1	-2	-2	0	-2	1	4	-2	0	-3	-2	-3	-1	2	-2	2	-1	-4	-5	1	-4	-5	-3
2	0	0	0	0	0	0	0	0	0.527481	0.444377	0.388975	0.297169	0.196102	0.135574	0.110386	0.085080	0.066007	0.055878	0.051430	0.045888	0.043692	0	0	0	0	0	0	0	0	0	0	0	0	0	0	0	0	0	0	0	0	0	0	0	0	0	0	0	0
2	0.043618	0.043313	0.043758	0.043081	0.046091	0.046166	0.038362	0.032964	0.029506	0.025376	0.023374	0.021077	0.020818	0.020056	0.019246	0.017465	0.016962	0.017548	0.019325	0.019345	0.020754	2	1	-1	1	-3	1	4	-2	1	-4	-5	0	-3	-3	-3	1	1	0	-4	-4	-3	-3	3	5	-4	-2	0	-4
2	0.017548	0.019325	0.019345	0.020754	0.024700	0.030193	0.046181	0.077278	0.121676	0.202743	0.300884	0.397369	0.487567	0.550924	0.568059	0.512938	0.450104	0.372433	0.308127	0.233909	0.206418	-2	-5	-5	-6	-2	-5	-5	-6	-6	5	1	-5	-1	0	-5	-4	2	-4	-2	4	4	-5	-4	-4	-2	-4	-4	4
2	0.020754	0.024700	0.030193	0.046181	0.077278	0.121676	0.202743	0.300884	0.397369	0.487567	0.550924	0.568059	0.512938	0.450104	0.372433	0.308127	0.233909	0.206418	0.179756	0.158193	0.126053	-1	-5	-2	8	-6	-3	-1	-3	-3	-6	-7	-4	-6	-7	-4	-3	-4	-7	-6	-6	-5	-3	2	-2	-6	-1	-3	-5
2	0.487567	0.550924	0.568059	0.512938	0.450104	0.372433	0.308127	0.233909	0.206418	0.179756	0.158193	0.126053	0.100410	0.079749	0.062601	0.051015	0.044123	0.041303	0.039625	0.035229	0.034526	-3	-1	-2	-1	-5	5	1	-3	0	-4	-3	5	-2	-5	-1	-1	-2	-4	-4	-4	-1	1	0	1	-3	0	0	-1
2	0.026865	0.026282	0.025904	0.027978	0.033405	0.044381	0.063223	0.079925	0.092338	0.107592	0.110744	0.117115	0.115775	0.107124	0.089358	0.080700	0.065405	0.052554	0.044990	0.035114	0.025790	1	6	-2	-4	-2	-2	-3	-1	-3	-2	0	-2	1	-2	-5	1	-1	-5	-2	-3	-3	-5	-6	-6	-4	-5	-6	-4
2	0.026282	0.025904	0.027978	0.033405	0.044381	0.063223	0.079925	0.092338	0.107592	0.110744	0.117115	0.115775	0.107124	0.089358	0.080700	0.065405	0.052554	0.044990	0.035114	0.025790	0.017364	-3	-5	-6	-6	-4	-5	-6	-4	-5	0	4	-5	7	2	-3	-4	-4	-2	0	2	1	-3	-2	0	-3	-1	-1	-2
2	0.035114	0.025790	0.017364	0.012584	0.009914	0.008797	0.008132	0.007889	0.009144	0.011042	0.012797	0.015837	0.018351	0.022112	0.033170	0.050589	0.067903	0.077485	0.085197	0.078252	0.062792	-2	-5	-6	-6	-5	-5	-6	-6	-5	1	3	-6	2	7	-6	-5	-4	3	1	1	1	-5	-6	-6	1	-5	-5	-5
2	0.007889	0.009144	0.011042	0.012797	0.015837	0.018351	0.022112	0.033170	0.050589	0.067903	0.077485	0.085197	0.078252	0.062792	0.044911	0.034770	0.021170	0.014977	0.010954	0.008453	0.006372	0	0	7	-2	-5	-2	-2	1	-2	-4	-5	1	-3	-5	-5	-2	-1	-6	-4	-5	3	-5	-3	-5	-1	-3	-4	-4
2	0.009144	0.011042	0.012797	0.015837	0.018351	0.022112	0.033170	0.050589	0.067903	0.077485	0.085197	0.078252	0.062792	0.044911	0.034770	0.021170	0.014977	0.010954	0.008453	0.006372	0.006554	3	-5	-3	-5	-1	-3	-4	-4	-1	-1	-5	-4	-3	-6	7	-3	-1	-6	-5	-1	7	-4	-3	-5	-2	-2	-3	-3
2	0.095462	0.094043	0.103527	0.097162	0.090959	0.075217	0.055813	0.036461	0.024130	0.016851	0.012528	0.012134	0.012653	0.012263	0.011595	0.011349	0.010198	0.007868	0.005948	0.004505	0.004133	1	3	3	-1	-5	-2	-2	0	-1	-3	-3	5	-2	-6	-3	-2	-3	-6	-4	-3	2	-5	1	-5	6	-4	-5	1
2	0.004505	0.004133	0.005142	0.005754	0.008513	0.010517	0.016380	0.022596	0.031785	0.047808	0.061330	0.076459	0.089673	0.116674	0.151163	0.199516	0.245063	0.282010	0.324376	0.350237	0.378875	-4	-5	-6	-6	-4	-5	-6	-6	-5	5	3	-5	3	3	-6	-4	-3	3	1	2	-1	-3	-4	-5	1	-3	-5	-4
2	0.010517	0.016380	0.022596	0.031785	0.047808	0.061330	0.076459	0.089673	0.116674	0.151163	0.199516	0.245063	0.282010	0.324376	0.350237	0.378875	0.385817	0.408612	0.406243	0.380170	0.365768	-3	0	-5	-4	-1	-3	-3	-6	-2	4	1	-2	-1	-1	-1	-4	0	-4	-3	5	1	-5	-6	-6	1	-4	-5	-5
2	0.116674	0.151163	0.199516	0.245063	0.282010	0.324376	0.350237	0.378875	0.385817	0.408612	0.406243	0.380170	0.365768	0.347728	0.332971	0.329144	0.350663	0.368356	0.402070	0.444959	0.507460	-3	1	0	-3	-1	0	-3	-4	3	1	1	1	0	-2	-5	-1	1	-5	0	3	1	-3	-2	-1	1	-2	-2	4
2	0.245063	0.282010	0.324376	0.350237	0.378875	0.385817	0.408612	0.406243	0.380170	0.365768	0.347728	0.332971	0.329144	0.350663	0.368356	0.402070	0.444959	0.507460	0.578775	0.627188	0.671088	1	1	-3	-3	-5	0	2	-3	-1	-5	-4	3	-4	-6	5	-1	-2	-6	-3	-4	0	-2	-2	-3	-4	-3	-4	6
2	0.329144	0.350663	0.368356	0.402070	0.444959	0.507460	0.578775	0.627188	0.671088	0.705189	0.685734	0.685966	0.664342	0	0	0	0	0	0	0	0	0	-3	1	0	-1	2	-1	3	-4	-5	-5	-2	-4	-4	5	1	-1	-5	-5	-3	2	2	-1	2	-4	-2	0	-3
2	0	0	0	0	0	0.527481	0.444377	0.388975	0.297169	0.196102	0.135574	0.110386	0.085080	0.066007	0.055878	0.051430	0.045888	0.043692	0.040958	0.033691	0.029341	0	0	0	0	0	0	0	0	0	0	0	0	0	0	0	0	0	0	0	0	0	0	0	0	0	0	0	0
2	0.160458	0.200808	0.222179	0.232695	0.228481	0.233158	0.245247	0.258825	0.268261	0.301057	0.299279	0.254327	0.200002	0.150879	0.084999	0.046273	0.031433	0.021554	0.018235	0.018140	0.017684	-4	-5	-5	-6	-2	-5	-6	-6	-3	2	3	-5	5	6	-6	-5	-3	-2	0	1	-1	5	2	2	-4	3	2	-1
2	0.009604	0.009121	0.007400	0.006303	0.006957	0.008264	0.010786	0.015413	0.027097	0.043448	0.073167	0.104142	0.128834	0.159943	0.179814	0.178215	0.168592	0.171521	0.153615	0.149263	0.160363	-2	-4	-3	-4	-4	-4	-4	-5	-5	-4	-4	-4	-4	-5	-4	-1	8	-6	-5	-2	0	-4	-3	-4	1	-4	-4	-3
2	0.176596	0.152306	0.128767	0.107875	0.092495	0.087161	0.077627	0.077567	0.089888	0.127516	0.193646	0.272194	0.353248	0.433849	0.512105	0.569302	0.605673	0.622757	0.592638	0.547645	0.465304	-2	-1	-4	-5	-3	-4	-4	-3	-4	4	2	-4	3	-1	-4	-4	-3	-4	-3	4	-2	0	6	-1	-4	1	-1	-3
2	0.128767	0.107875	0.092495	0.087161	0.077627	0.077567	0.089888	0.127516	0.193646	0.272194	0.353248	0.433849	0.512105	0.569302	0.605673	0.622757	0.592638	0.547645	0.465304	0.408359	0.361877	0	-4	-4	-4	-3	-4	-4	-4	-4	6	0	-4	0	0	-4	-3	-1	-3	1	3	-3	-4	-4	-4	-3	-4	-4	-4
2	0.077627	0.077567	0.089888	0.127516	0.193646	0.272194	0.353248	0.433849	0.512105	0.569302	0.605673	0.622757	0.592638	0.547645	0.465304	0.408359	0.361877	0.360388	0.338706	0.345207	0.352476	1	-3	-2	-3	0	-3	-3	-2	-3	-3	-3	-3	-3	-4	-3	1	7	-4	-4	-2	-2	-4	-2	-3	-4	-3	-4	7
2	0.408359	0.361877	0.360388	0.338706	0.345207	0.352476	0.339266	0.294548	0.267375	0.211173	0.151791	0.114808	0.110204	0.123974	0.165610	0.227008	0.306316	0.387009	0.456044	0.476198	0.531245	-2	0	-3	-4	-3	-2	-3	-2	1	2	2	-2	3	0	-3	-3	0	-3	0	3	2	2	-1	0	-3	0	0	0
2	0.550473	0.613077	0.604639	0.637508	0.671496	0.694487	0.707844	0.713351	0.711275	0.649947	0.604591	0.546017	0.483097	0.436281	0.370695	0.331616	0.297794	0.274494	0.258888	0.256119	0.253131	0	-1	-1	5	-4	-1	2	0	-3	-1	-3	-2	-2	-1	-2	-2	0	-4	-3	-3	-2	-2	-2	3	-3	1	0	5
2	0.637508	0.671496	0.694487	0.707844	0.713351	0.711275	0.649947	0.604591	0.546017	0.483097	0.436281	0.370695	0.331616	0.297794	0.274494	0.258888	0.256119	0.253131	0.238871	0.233498	0.206803	-1	-1	2	2	-2	1	0	1	-1	1	-1	-1	-1	-2	1	0	-1	-2	-2	-1	-1	0	-1	-1	1	-1	0	-1
2	0.694487	0.707844	0.713351	0.711275	0.649947	0.604591	0.546017	0.483097	0.436281	0.370695	0.331616	0.297794	0.274494	0.258888	0.256119	0.253131	0.238871	0.233498	0.206803	0.184367	0.175474	0	0	1	0	1	0	-1	0	-1	-1	-1	1	2	-1	1	0	0	-1	1	-1	1	-1	-1	0	-1	0	0	3
2	0.184367	0.175474	0.178909	0.184813	0.205193	0.206517	0.209041	0.193017	0.185687	0.151786	0.125519	0.099117	0.085168	0.062748	0.063065	0.064137	0.061006	0.056096	0.047579	0.036584	0.028433	0	-4	0	2	4	-3	-1	2	-4	-3	-5	-1	-4	-5	-4	4	1	1	-2	0	-1	-1	-2	-1	-2	0	2	-3
2	0.329276	0.260924	0.198783	0.172346	0.155396	0.156923	0.146223	0.143854	0.143705	0.136541	0.121272	0.113513	0.098453	0.083922	0.070258	0.059602	0.055769	0.053893	0.054081	0.061680	0.083871	-4	5	2	-3	-5	5	1	-4	0	-4	-2	-1	4	-4	-4	-3	-2	-5	-2	-4	-2	-4	-2	-4	-3	-3	-3	-3
2	0.137134	0.190951	0.261770	0.312270	0.375002	0.417530	0.438606	0.452507	0.493159	0.477336	0.420045	0.372657	0.313164	0.239268	0.193451	0.187528	0.177024	0.162996	0.172795	0.176130	0.174146	0	2	0	-1	-5	1	1	4	4	-3	-5	-3	-1	-5	-1	0	0	-5	-4	-5	1	3	-2	0	-5	-2	-2	0
2	0.372657	0.313164	0.239268	0.193451	0.187528	0.177024	0.162996	0.172795	0.176130	0.174146	0.168922	0.158522	0.130309	0.115552	0.118551	0.130857	0.168600	0.224989	0.300534	0.378442	0.444245	-2	0	-5	-5	0	-4	-3	-4	0	4	2	-4	0	2	-2	-4	-1	0	2	2	-2	-5	-6	-6	-4	-5	-5	-6
2	0.176130	0.174146	0.168922	0.158522	0.130309	0.115552	0.118551	0.130857	0.168600	0.224989	0.300534	0.378442	0.444245	0.461814	0.452984	0.436017	0.394869	0.354076	0.322541	0.297265	0.251639	2	-4	-4	-4	-4	-3	-2	-1	-2	1	2	-2	0	-1	5	-3	-1	-4	-4	-1	0	1	1	3	-4	-1	2	0
2	0.130309	0.115552	0.118551	0.130857	0.168600	0.224989	0.300534	0.378442	0.444245	0.461814	0.452984	0.436017	0.394869	0.354076	0.322541	0.297265	0.251639	0.198931	0.147719	0.117319	0.083889	0	-4	-2	-4	3	0	-4	-4	-4	3	2	-4	-1	-1	-4	1	-1	-4	-2	3	-3	-4	-5	-5	-3	-4	-4	-5
2	0.224989	0.300534	0.378442	0.444245	0.461814	0.452984	0.436017	0.394869	0.354076	0.322541	0.297265	0.251639	0.198931	0.147719	0.117319	0.083889	0.056173	0.043387	0.040902	0.046306	0.068705	-2	-3	4	6	-1	1	-1	0	-3	-5	-5	-3	-4	0	-4	-1	-3	-5	-4	-5	-1	4	-2	1	-2	-1	1	-1
2	0.444245	0.461814	0.452984	0.436017	0.394869	0.354076	0.322541	0.297265	0.251639	0.198931	0.147719	0.117319	0.083889	0.056173	0.043387	0.040902	0.046306	0.068705	0.097300	0.125836	0.143561	-1	-3	-1	1	-4	-1	0	1	1	1	-1	-1	0	0	2	-1	3	-2	-4	-2	-1	-3	2	6	-2	-1	0	-2
2	0.040902	0.046306	0.068705	0.097300	0.125836	0.143561	0.158982	0.175118	0.201067	0.234914	0.274809	0.283616	0.287281	0.267195	0.238009	0.192693	0.174044	0.145885	0.121137	0.097290	0.093733	-2	-1	1	-4	-4	-3	-4	-4	-2	-2	-2	-4	-3	3	-4	-2	1	7	6	-1	-1	-2	-5	-5	2	-4	-4	-5
2	0.287281	0.267195	0.238009	0.192693	0.174044	0.145885	0.121137	0.097290	0.093733	0.091391	0.090378	0.101145	0.116860	0.125201	0.127677	0.136216	0.142195	0.127219	0.113183	0.095873	0.081427	0	0	0	0	-5	2	-2	-4	0	-1	0	-3	1	2	2	-1	-1	2	4	-3	-1	-4	1	-1	-4	-3	-1	-2
2	0.145885	0.121137	0.097290	0.093733	0.091391	0.090378	0.101145	0.116860	0.125201	0.127677	0.136216	0.142195	0.127219	0.113183	0.095873	0.081427	0.063881	0.068043	0.076978	0.083216	0.093119	-2	6	-1	-2	-5	-2	-1	-4	0	-2	-1	-1	4	-2	-4	-2	-2	-4	-2	-1	2	-4	-1	-1	-1	-3	0	-4
2	0.091391	0.090378	0.101145	0.116860	0.125201	0.127677	0.136216	0.142195	0.127219	0.113183	0.095873	0.081427	0.063881	0.068043	0.076978	0.083216	0.093119	0.093910	0.093188	0.093386	0.116388	-2	-5	-5	-5	-4	-5	-5	-6	-5	4	3	-5	3	0	-5	-4	-2	-5	-3	4	2	2	-3	-4	0	-1	-1	-3
2	0.149854	0.204510	0.301705	0.404902	0.498369	0.583461	0.660602	0.692110	0.712271	0.735460	0.733382	0.733270	0.705949	0.664711	0.574537	0.458772	0.342344	0.224395	0.133735	0.078967	0.054733	-1	1	-2	-3	-4	-1	-2	-2	0	-2	-1	4	0	0	-3	1	-1	-3	3	-2	-1	-3	0	1	-3	0	-2	-2
2	0.301705	0.404902	0.498369	0.583461	0.660602	0.692110	0.712271	0.735460	0.733382	0.733270	0.705949	0.664711	0.574537	0.458772	0.342344	0.224395	0.133735	0.078967	0.054733	0.038996	0.040311	-2	3	-1	1	-4	-1	-2	-3	4	-3	-1	-2	3	-1	3	-2	-3	0	4	-2	-1	-1	-4	-2	-3	-1	-3	-1
2	0.098453	0.083922	0.070258	0.059602	0.055769	0.053893	0.054081	0.061680	0.083871	0.135320	0.204107	0.273597	0.330791	0.378150	0.405815	0.409807	0.408372	0.383125	0.354673	0.312674	0.267112	-2	-5	-3	-4	-1	-4	-4	7	-5	-7	-6	-4	-5	-6	-5	-3	-4	-5	-6	-6	-2	2	-3	-5	-1	-3	-3	-5
2	0.078967	0.054733	0.038996	0.040311	0.044810	0.052632	0.067282	0.089262	0.107109	0.129216	0.146909	0.176772	0.196932	0.234018	0.251673	0.286309	0.289155	0.262880	0.204673	0.155885	0.100850	-3	-1	-2	-1	0	-3	-2	-2	7	-3	-2	-3	-3	2	-3	-2	-2	-2	6	-2	-3	-4	-4	-2	-3	-4	-4	-5
2	0.067282	0.089262	0.107109	0.129216	0.146909	0.176772	0.196932	0.234018	0.251673	0.286309	0.289155	0.262880	0.204673	0.155885	0.100850	0.056626	0.035110	0.037935	0.037776	0.043892	0.051896	1	-2	-5	-5	1	-2	-4	-2	-5	4	2	0	0	-1	-5	-4	-2	-5	-4	3	-1	0	-2	0	-5	-1	0	-2
2	0.204673	0.155885	0.100850	0.056626	0.035110	0.037935	0.037776	0.043892	0.051896	0.067765	0.084748	0.091816	0.100157	0.132783	0.158617	0.216743	0.290105	0.362321	0.449677	0.540650	0.586294	0	-3	-2	3	-3	4	1	-4	-1	1	-1	0	0	-1	-4	-2	1	-5	-1	0	0	-5	-6	-6	-4	-5	-5	-6
2	0.051896	0.067765	0.084748	0.091816	0.100157	0.132783	0.158617	0.216743	0.290105	0.362321	0.449677	0.540650	0.586294	0.620162	0.644911	0.664696	0.654812	0.647558	0.647947	0.648587	0.646609	-4	-3	8	-1	-5	-3	-3	-3	-2	-5	-6	-3	-5	-6	-5	-2	-1	-6	-5	-2	-2	-5	-5	-4	-1	-4	-4	-5
2	0.216743	0.290105	0.362321	0.449677	0.540650	0.586294	0.620162	0.644911	0.664696	0.654812	0.647558	0.647947	0.648587	0.646609	0.660590	0.687553	0.706107	0.736817	0.768042	0.788216	0.803140	-2	0	-2	-5	-4	-2	-4	-5	-4	1	2	-2	0	6	-5	-2	-3	0	0	2	-1	3	0	3	-5	0	1	-3
2	0.449677	0.540650	0.586294	0.620162	0.644911	0.664696	0.654812	0.647558	0.647947	0.648587	0.646609	0.660590	0.687553	0.706107	0.736817	0.768042	0.788216	0.803140	0.825158	0.842245	0.851214	-1	5	-2	-3	-4	-1	-2	-1	-3	-2	-4	3	-3	-4	5	-1	-3	-4	-4	-4	-1	5	-2	-3	-4	-1	0	2
2	0.654812	0.647558	0.647947	0.648587	0.646609	0.660590	0.687553	0.706107	0.736817	0.768042	0.788216	0.803140	0.825158	0.842245	0.851214	0.864893	0.872453	0	0	0	0	-1	-3	-2	-3	-3	-2	-3	3	2	-2	3	-3	-1	-2	-3	1	1	-3	-3	-2	0	-1	-3	-3	-3	-1	-2	-3
2	0.647558	0.647947	0.648587	0.646609	0.660590	0.687553	0.706107	0.736817	0.768042	0.788216	0.803140	0.825158	0.842245	0.851214	0.864893	0.872453	0	0	0	0	0	0	-1	-3	-3	-3	-1	-2	-3	-3	0	-1	3	2	-3	6	-2	-2	-4	-3	-2	-2	-3	-2	4	-3	-3	-2	-4
2	0	0	0	0	0	0	0	0.894950	0.861710	0.829603	0.715166	0.592013	0.459954	0.329276	0.260924	0.198783	0.172346	0.155396	0.156923	0.146223	0.143854	0	0	0	0	0	0	0	0	0	0	0	0	0	0	0	0	0	0	0	0	0	0	0	0	0	0	0	0
2	0.162938	0.127090	0.114952	0.097965	0.092842	0.104233	0.114735	0.129675	0.153866	0.171598	0.172753	0.173649	0.198481	0.196416	0.186020	0.175752	0.162546	0.121094	0.101413	0.086760	0.074311	-1	-1	1	0	5	-3	0	-4	0	0	1	-4	-1	3	-1	-2	0	1	1	-1	0	2	0	-3	1	-1	2	-2
2	0.097965	0.092842	0.104233	0.114735	0.129675	0.153866	0.171598	0.172753	0.173649	0.198481	0.196416	0.186020	0.175752	0.162546	0.121094	0.101413	0.086760	0.074311	0.064704	0.060707	0.059602	-2	0	1	5	-5	0	0	-2	-3	-2	0	-2	-2	0	-4	0	0	-5	-1	-2	-2	1	3	5	0	1	2	-3
2	0.105903	0.105783	0.103463	0.109184	0.107510	0.114462	0.117675	0.127593	0.140047	0.166063	0.181509	0.203038	0.221582	0.263075	0.302268	0.339432	0.371237	0.399091	0.384159	0.335797	0.298987	-2	-1	-1	0	3	-2	-3	1	-4	-4	-4	-3	-2	-5	-4	2	6	-5	-4	-2	-1	-4	3	-3	3	-3	-4	-1
2	0.166063	0.181509	0.203038	0.221582	0.263075	0.302268	0.339432	0.371237	0.399091	0.384159	0.335797	0.298987	0.262480	0.218168	0.176596	0.152306	0.128767	0.107875	0.092495	0.087161	0.077627	-1	1	-1	0	0	2	2	-2	0	-3	-1	1	-2	-3	2	0	0	-2	-1	-2	2	3	-3	-1	-2	-1	-3	-1
2	0.051701	0.069746	0.098157	0.141297	0.178539	0.216855	0.256645	0.304567	0.361814	0.423078	0.505264	0.568776	0.622571	0.654372	0.666816	0.643194	0.579334	0.508199	0.448157	0.387939	0.330401	-3	-1	-3	-4	-5	-4	-5	7	-5	-6	-6	-4	-5	-6	-5	-3	-4	-5	-6	-6	-4	-4	-4	-5	-2	-1	-4	-4
2	0.098157	0.141297	0.178539	0.216855	0.256645	0.304567	0.361814	0.423078	0.505264	0.568776	0.622571	0.654372	0.666816	0.643194	0.579334	0.508199	0.448157	0.387939	0.330401	0.312127	0.302085	-4	-1	2	-4	-5	-3	-1	-2	4	-4	-4	-3	-4	2	-5	-2	-4	0	8	-4	-3	1	-3	0	-4	3	-2	-2
2	0.256645	0.304567	0.361814	0.423078	0.505264	0.568776	0.622571	0.654372	0.666816	0.643194	0.579334	0.508199	0.448157	0.387939	0.330401	0.312127	0.302085	0.310405	0.308383	0.312224	0.307219	0	-2	-2	-2	-2	-2	0	-2	3	-1	1	-1	0	4	-2	-2	0	-2	3	0	-1	-2	-2	-2	-3	2	0	0
2	0.307219	0.308052	0.303106	0.289110	0.264610	0.272397	0.268418	0.264033	0.280965	0.278973	0.269645	0.256547	0.227568	0.199681	0.177752	0.172759	0.194154	0.245050	0.314254	0.403447	0.461283	-1	-1	-1	-4	2	-1	-4	0	-4	-4	-2	-4	0	1	6	0	-1	3	2	-2	-1	0	-1	1	1	1	3	-4
2	0.403447	0.461283	0.524642	0.544257	0.559533	0.548006	0.534476	0.492357	0.454906	0.433062	0.400536	0.388040	0.348892	0.322993	0.288461	0.273801	0.228543	0.211728	0.183037	0.148041	0.110903	-2	-5	-5	-6	-1	-5	-5	-6	-5	5	2	-3	0	0	-5	-3	-3	1	-4	4	-3	-1	0	-1	-4	-2	2	0
2	0.148041	0.110903	0.101730	0.104340	0.131249	0.140396	0.158284	0.163398	0.168411	0.149789	0.136201	0.116550	0.108848	0.091041	0.097080	0.113609	0.128173	0.138690	0.167685	0.199318	0.228450	0	-4	0	2	5	-4	-1	3	0	-3	-5	-4	-4	-5	-4	3	0	1	-3	-1	0	-1	-2	-3	-5	-2	1	-1
2	0.091041	0.097080	0.113609	0.128173	0.138690	0.167685	0.199318	0.228450	0.269301	0.331080	0.382555	0.418810	0.448889	0.465008	0.466591	0.435209	0.444557	0.443106	0.442415	0.453895	0.438228	-1	5	-3	0	-5	2	1	-4	1	-1	0	1	-3	-4	-4	-1	-2	-4	-1	-2	6	-2	-4	-2	0	-2	-2	0
2	0.447134	0.451565	0.444147	0.407119	0.388890	0.404302	0.386433	0.343686	0.318856	0.312502	0.281759	0.260876	0.253634	0.218706	0.176535	0.154085	0.134081	0.127285	0.129447	0.139784	0.147997	-1	2	-1	2	-4	1	-2	-2	-4	-3	-3	1	1	-5	0	1	4	-5	-4	-3	-1	2	-2	1	0	0	1	-1
2	0.251869	0.296851	0.343921	0.392588	0.432039	0.458166	0.464164	0.470454	0.467581	0.432331	0.381627	0.328699	0.270538	0.203597	0.177239	0.158081	0.139272	0.120397	0.128315	0.129034	0.155964	0	-4	1	-4	5	-1	-4	-4	-4	0	3	-3	4	-3	-4	1	1	-4	-4	1	-3	-3	4	6	-1	1	0	0
2	0.432039	0.458166	0.464164	0.470454	0.467581	0.432331	0.381627	0.328699	0.270538	0.203597	0.177239	0.158081	0.139272	0.120397	0.128315	0.129034	0.155964	0.190082	0.209540	0.212774	0.228238	-1	-4	-1	2	-4	-1	-1	0	-1	1	-1	0	-1	1	2	-2	4	-2	-3	-2	-2	-2	2	6	-4	-1	1	-1
2	0.139272	0.120397	0.128315	0.129034	0.155964	0.190082	0.209540	0.212774	0.228238	0.245556	0.269797	0.308382	0.374051	0.413192	0.432090	0.424550	0.405888	0.338525	0.278377	0.210331	0.154726	-2	-4	0	-3	-4	-3	-4	7	-4	-5	-5	-1	-4	-5	-4	-2	-3	-4	-5	-5	2	-4	-4	-4	7	-4	-4	-1
2	0.128315	0.129034	0.155964	0.190082	0.209540	0.212774	0.228238	0.245556	0.269797	0.308382	0.374051	0.413192	0.432090	0.424550	0.405888	0.338525	0.278377	0.210331	0.154726	0.101584	0.077337	-4	-1	1	-4	-4	-3	-4	-4	-2	-2	-2	-4	-3	3	-4	-2	0	8	6	-2	0	-4	-4	-5	2	-4	-4	-4
2	0.069629	0.049680	0.049549	0.053343	0.064174	0.084197	0.115278	0.162111	0.230074	0.330631	0.432485	0.494455	0.555109	0.571372	0.554687	0.539057	0.540760	0.529063	0.536535	0.519688	0.457944	-3	6	-1	-4	-6	4	-2	-5	3	-4	-5	3	-1	-5	-5	-3	-4	2	-4	-4	-3	-5	-6	-6	-4	-5	-6	-6
2	0.064174	0.084197	0.115278	0.162111	0.230074	0.330631	0.432485	0.494455	0.555109	0.571372	0.554687	0.539057	0.540760	0.529063	0.536535	0.519688	0.457944	0.403083	0.313780	0.224719	0.146547	2	-3	0	-3	-3	-3	-1	0	-3	-4	-4	-3	-4	-5	-3	6	-1	-5	-4	-4	2	-3	-1	-4	-1	0	-3	1
2	0.529063	0.536535	0.519688	0.457944	0.403083	0.313780	0.224719	0.146547	0.100585	0.061818	0.048871	0.040916	0.039694	0.042801	0.046603	0.052214	0.069250	0.107297	0.175260	0.242954	0.348962	1	-1	-1	-2	-4	-3	-2	6	-4	-3	-2	-2	-2	-4	0	-2	-3	-4	-3	-1	0	-1	1	-1	0	-1	1	2
2	0.536535	0.519688	0.457944	0.403083	0.313780	0.224719	0.146547	0.100585	0.061818	0.048871	0.040916	0.039694	0.042801	0.046603	0.052214	0.069250	0.107297	0.175260	0.242954	0.348962	0.429860	0	-1	1	-1	0	-1	1	2	0	-1	-1	1	-1	-2	2	-1	0	-2	0	-1	-3	-2	-1	1	-4	0	-2	5
2	0.042801	0.046603	0.052214	0.069250	0.107297	0.175260	0.242954	0.348962	0.429860	0.487133	0.510558	0.547035	0.533672	0.519504	0.511709	0.477672	0.394713	0.299326	0.213067	0.124846	0.062011	-1	-2	-4	-5	-2	-3	-4	-3	0	4	2	-2	0	-2	-4	-3	-2	-4	-3	4	-2	-4	-3	-2	-4	-3	-2	-3
2	0.242954	0.348962	0.429860	0.487133	0.510558	0.547035	0.533672	0.519504	0.511709	0.477672	0.394713	0.299326	0.213067	0.124846	0.062011	0.032121	0.021719	0.016526	0.015068	0.020075	0.025001	1	0	0	1	-2	0	2	-2	0	-1	1	-1	1	-1	-1	-1	-1	-2	1	-1	1	-1	-1	-1	0	-1	-1	0
2	0.487133	0.510558	0.547035	0.533672	0.519504	0.511709	0.477672	0.394713	0.299326	0.213067	0.124846	0.062011	0.032121	0.021719	0.016526	0.015068	0.020075	0.025001	0.028809	0.036420	0.052383	1	4	-1	-1	-4	3	3	-3	-1	-3	-1	0	-2	-4	-2	-1	-1	-4	-3	-3	3	5	0	-3	-4	-1	1	-3
2	0.510558	0.547035	0.533672	0.519504	0.511709	0.477672	0.394713	0.299326	0.213067	0.124846	0.062011	0.032121	0.021719	0.016526	0.015068	0.020075	0.025001	0.028809	0.036420	0.052383	0.096150	3	5	0	-3	-4	-1	1	-3	2	-3	-3	2	-2	-4	-3	-1	-3	-4	-3	-2	0	-4	0	-3	-4	-3	-3	6
2	0.016526	0.015068	0.020075	0.025001	0.028809	0.036420	0.052383	0.096150	0.215787	0.383717	0.465240	0.577698	0	0	0	0	0	0	0	0	0	-4	1	-2	-5	-1	-4	-2	-5	2	3	-2	-1	-2	-2	-5	-3	0	5	2	4	-2	2	2	5	-6	-1	4	-1
2	0.015068	0.020075	0.025001	0.028809	0.036420	0.052383	0.096150	0.215787	0.383717	0.465240	0.577698	0	0	0	0	0	0	0	0	0	0	-2	2	2	5	-6	-1	4	-1	1	-4	-5	0	-5	-6	-4	-2	0	-6	-3	-5	-4	-3	9	-1	-6	-3	-3	-3
2	0.392495	0.425325	0.419122	0.396189	0.373024	0.330905	0.315637	0.324292	0.344980	0.375759	0.407608	0.409092	0.385262	0.345345	0.293235	0.241204	0.221596	0.223686	0.223775	0.211284	0.209874	-3	2	2	-1	-5	1	1	-2	1	-2	-1	3	1	-1	1	-1	0	-5	-3	-1	-3	-1	4	2	-5	-1	0	0
2	0.419122	0.396189	0.373024	0.330905	0.315637	0.324292	0.344980	0.375759	0.407608	0.409092	0.385262	0.345345	0.293235	0.241204	0.221596	0.223686	0.223775	0.211284	0.209874	0.196937	0.176084	1	1	2	3	-4	-3	-1	-2	1	-3	-1	0	-4	-4	4	-1	-2	1	-1	-2	-2	0	-1	4	-2	-2	2	0
2	0.221596	0.223686	0.223775	0.211284	0.209874	0.196937	0.176084	0.158893	0.145192	0.154133	0.129315	0.130992	0.148389	0.144044	0.136628	0.116349	0.109109	0.096701	0.085214	0.084025	0.084645	-2	0	-2	3	-6	0	6	-2	-3	-5	-5	1	-4	-5	-4	-2	-3	-5	0	-5	-1	-4	-5	-6	-4	-4	-5	-5
2	0.104114	0.112176	0.111013	0.115857	0.127593	0.148212	0.155195	0.163738	0.164780	0.149667	0.125481	0.108950	0.091331	0.074369	0.060606	0.053622	0.047794	0.047375	0.045493	0.046077	0.044806	-4	8	-3	-4	-6	-1	-3	-3	-3	-6	-5	0	-4	-5	-2	-3	-4	-5	-4	-5	-3	1	4	6	-5	-2	-2	-3
2	0.060606	0.053622	0.047794	0.047375	0.045493	0.046077	0.044806	0.051701	0.069746	0.098157	0.141297	0.178539	0.216855	0.256645	0.304567	0.361814	0.423078	0.505264	0.568776	0.622571	0.654372	-2	-5	-6	-6	-4	-5	-5	-5	-6	4	3	-5	2	-2	-5	-5	-3	-5	-4	5	-1	0	6	-2	-5	2	-2	-4
2	0.074138	0.076131	0.084130	0.081863	0.077979	0.084968	0.093441	0.089240	0.095181	0.092544	0.081623	0.065854	0.053001	0.035395	0.025269	0.019736	0.017716	0.014861	0.011749	0.009569	0.007271	0	-3	-2	-2	2	2	2	-2	0	-2	-4	-2	-1	-3	1	0	4	-5	-3	0	-2	-2	0	2	-4	-3	-3	-2
2	0.076131	0.084130	0.081863	0.077979	0.084968	0.093441	0.089240	0.095181	0.092544	0.081623	0.065854	0.053001	0.035395	0.025269	0.019736	0.017716	0.014861	0.011749	0.009569	0.007271	0.004941	-2	-2	0	2	-4	-3	-3	-2	-3	-1	-3	-2	-3	-4	0	4	4	-6	-4	0	-3	-3	-1	1	-4	-4	-4	-4
2	0.093441	0.089240	0.095181	0.092544	0.081623	0.065854	0.053001	0.035395	0.025269	0.019736	0.017716	0.014861	0.011749	0.009569	0.007271	0.004941	0.003648	0.002822	0.002438	0.002850	0.005807	-3	-6	-6	-7	-5	-5	-6	-6	-5	2	4	-6	2	5	-6	-5	-4	-1	3	1	1	0	0	4	-6	2	4	-4
2	0.923587	0.864290	0.768572	0.645732	0.520429	0.392237	0.276488	0.196278	0.144656	0.101100	0.079113	0.069506	0.060918	0.056390	0.066904	0.082008	0.090565	0.096936	0.097724	0.088895	0.076969	0	5	2	-3	-4	-1	-1	-3	0	-4	-1	0	-3	-4	0	0	1	-5	-3	-3	-2	-4	-3	-3	-1	-3	-4	-5
2	0.173601	0.205324	0.224937	0.238312	0.245413	0.229131	0.208977	0.186760	0.156518	0.130183	0.101933	0.079002	0.058565	0.042438	0.027900	0.021879	0.020251	0.018996	0.019136	0.021605	0.027860	1	-1	0	2	-4	2	2	0	-1	-4	-2	1	-3	-4	-2	2	-1	-4	-4	-3	-1	-1	-1	-1	-3	0	-1	-3
2	0.027900	0.021879	0.020251	0.018996	0.019136	0.021605	0.027860	0.040388	0.050136	0.063764	0.077380	0.096496	0.129788	0.183729	0.240047	0.296045	0.335719	0.359150	0.329574	0.281744	0.226929	0	-5	-6	-6	4	-5	-6	-6	-2	4	-1	-5	-1	-2	-5	-4	-1	-5	0	5	2	-2	4	-4	4	-3	-4	-4
2	0.296045	0.335719	0.359150	0.329574	0.281744	0.226929	0.173209	0.114733	0.109713	0.120234	0.128902	0.148929	0.161735	0.138155	0.108523	0.088750	0.058069	0.037131	0.033405	0.032937	0.030659	-1	-5	-5	-6	0	-2	-5	-3	-6	2	4	-5	2	-3	-3	-1	-3	-5	-3	4	-2	-1	3	5	-3	-1	-1	-3
2	0.329574	0.281744	0.226929	0.173209	0.114733	0.109713	0.120234	0.128902	0.148929	0.161735	0.138155	0.108523	0.088750	0.058069	0.037131	0.033405	0.032937	0.030659	0.034884	0.039881	0.040205	1	0	-1	3	-3	-1	2	3	-2	-6	-4	-2	-3	-3	-2	2	-1	-3	-1	-4	-1	-2	-2	2	-5	3	4	-1
2	0.041911	0.046549	0.049055	0.050810	0.064433	0.092406	0.129926	0.187438	0.260845	0.339100	0.398675	0.411546	0.410404	0.385045	0.347566	0.309560	0.325131	0.336957	0.387035	0.398527	0.409100	-4	-2	-3	-1	-7	-1	8	-5	-3	-6	-6	-2	-5	-6	-4	-3	-3	-6	-5	-6	-3	-4	7	5	-4	-2	-1	-3
2	0.046549	0.049055	0.050810	0.064433	0.092406	0.129926	0.187438	0.260845	0.339100	0.398675	0.411546	0.410404	0.385045	0.347566	0.309560	0.325131	0.336957	0.387035	0.398527	0.409100	0.399665	-3	-4	7	5	-4	-2	-1	-3	-2	-5	-6	-3	-4	-6	-5	-1	-2	-7	-5	-5	0	-4	1	1	-6	0	3	4
2	0.060918	0.056390	0.066904	0.082008	0.090565	0.096936	0.097724	0.088895	0.076969	0.068215	0.064523	0.060523	0.057136	0.049862	0.038962	0.029114	0.023349	0.019773	0.028618	0.054223	0.090223	2	-1	-3	-4	-2	-2	-4	6	-5	-6	-5	-3	-4	-6	-4	-2	-1	-6	-6	-4	-3	4	-1	-2	-3	0	0	-4
2	0.035054	0.048265	0.068123	0.092641	0.125806	0.168220	0.190695	0.228645	0.261826	0.260002	0.248305	0.246286	0.220545	0.169053	0.139672	0.107768	0.078048	0.047231	0.037949	0.031717	0.025856	-1	-4	-3	-3	-4	-3	-3	-2	-4	-4	-4	-3	4	-5	-4	6	2	-5	-4	-4	0	-4	1	-3	5	-3	-4	-2
2	0.092641	0.125806	0.168220	0.190695	0.228645	0.261826	0.260002	0.248305	0.246286	0.220545	0.169053	0.139672	0.107768	0.078048	0.047231	0.037949	0.031717	0.025856	0.019980	0.015821	0.014289	-1	0	-3	2	-5	1	4	0	-4	-2	-2	1	-2	-5	-2	1	-3	-5	-5	-3	5	-4	-4	-4	-2	-3	3	2
2	0.085713	0.096892	0.107380	0.138612	0.152062	0.154119	0.150347	0.150391	0.135089	0.131142	0.120021	0.112285	0.097629	0.077298	0.056968	0.048690	0.041642	0.034034	0.031111	0.035012	0.039241	0	-4	4	-2	3	-2	-3	-1	-4	-5	-4	-4	-2	-3	-4	5	-1	3	-4	-2	-3	-5	1	-4	-6	-4	-4	-5
2	0.103042	0.138424	0.116582	0.101196	0.109626	0.117944	0.151718	0.197352	0.254542	0.329961	0.391021	0.447171	0.463776	0.451752	0.437367	0.410853	0.374878	0.361728	0.348492	0.325501	0.289623	-2	-4	-2	-3	-4	-3	-3	-2	-4	-4	-5	-3	-4	-5	-4	5	5	-5	-5	-4	-1	-4	-2	8	-6	-3	-1	-2
2	0.109626	0.117944	0.151718	0.197352	0.254542	0.329961	0.391021	0.447171	0.463776	0.451752	0.437367	0.410853	0.374878	0.361728	0.348492	0.325501	0.289623	0.260613	0.228194	0.212849	0.189283	0	-5	-4	-4	0	-4	-4	-3	-3	-5	-5	-4	-1	-6	7	0	2	-6	-5	-3	-2	-3	-2	-5	3	-2	-4	-5
2	0.329961	0.391021	0.447171	0.463776	0.451752	0.437367	0.410853	0.374878	0.361728	0.348492	0.325501	0.289623	0.260613	0.228194	0.212849	0.189283	0.174829	0.165050	0.159500	0.147365	0.144743	-2	-2	-2	1	-6	5	4	-3	1	-5	0	-1	1	-4	-4	-2	-2	-5	-3	-4	-3	1	-3	-3	-6	-1	-2	-4
2	0.060523	0.057136	0.049862	0.038962	0.029114	0.023349	0.019773	0.028618	0.054223	0.090223	0.138005	0.201365	0.278628	0.336456	0.383755	0.445318	0.499147	0.518137	0.530008	0.545338	0.502427	5	-1	-4	-4	0	-1	-3	2	-4	-2	-3	-2	-2	-5	-3	-1	0	-3	-3	-2	-2	-4	0	7	-2	-2	1	-3
2	0.086374	0.075734	0.071800	0.092676	0.108444	0.117902	0.128318	0.125997	0.128186	0.124790	0.113874	0.096001	0.087322	0.073497	0.058663	0.050766	0.041525	0.037311	0.030724	0.029962	0.030688	0	-5	-6	-6	-4	-5	-5	-4	-6	3	4	-5	2	-1	-5	-2	-2	-3	-2	3	-3	-5	-6	-6	-3	-5	-6	-6
2	0.026695	0.024220	0.021690	0.018696	0.017924	0.016989	0.020633	0.030395	0.038584	0.044010	0.050543	0.050089	0.043225	0.035592	0.030933	0.021600	0.015135	0.010337	0.008035	0.005285	0.006183	3	-5	-3	-5	-1	-3	-4	-4	-1	-1	-5	-4	-3	-6	7	-3	-1	-6	-5	-1	7	-4	-3	-5	-2	-2	-3	-3
2	0.029114	0.023349	0.019773	0.028618	0.054223	0.090223	0.138005	0.201365	0.278628	0.336456	0.383755	0.445318	0.499147	0.518137	0.530008	0.545338	0.502427	0.453186	0.378684	0.302109	0.237453	-3	-6	-6	-6	2	-5	-6	-6	-6	6	-1	-6	1	-3	-6	-4	-2	-6	-4	4	-1	2	-1	2	-3	1	5	-4
2	0.006183	0.006622	0.007934	0.009546	0.015478	0.023996	0.038246	0.060365	0.106997	0.173357	0.302689	0.444348	0.583365	0.688770	0.718222	0.633945	0.525002	0.380969	0.256617	0.168437	0.134760	-5	-5	-1	8	-6	-3	-1	-4	-4	-6	-7	-4	-3	-6	-4	-3	-4	-7	-6	-6	-4	-5	-6	-6	-4	-5	-6	-7
2	0.015478	0.023996	0.038246	0.060365	0.106997	0.173357	0.302689	0.444348	0.583365	0.688770	0.718222	0.633945	0.525002	0.380969	0.256617	0.168437	0.134760	0.112066	0.108951	0.088957	0.077139	-4	-6	-6	-7	-5	-5	-6	-6	-5	2	0	-6	-1	3	-6	-5	-4	9	1	4	-2	-2	2	7	-6	-2	-1	-4
2	0.134760	0.112066	0.108951	0.088957	0.077139	0.056569	0.035984	0.018659	0.011090	0.007310	0.005927	0.005478	0.005485	0.005054	0.004717	0.004627	0.004416	0.003528	0.002793	0.002531	0.002588	2	3	3	-1	-5	-2	-2	0	-3	-3	-3	4	-2	-4	-3	-2	-3	-6	-4	-2	1	-5	1	-5	6	-2	-4	0
2	0.090223	0.138005	0.201365	0.278628	0.336456	0.383755	0.445318	0.499147	0.518137	0.530008	0.545338	0.502427	0.453186	0.378684	0.302109	0.237453	0.197853	0.150975	0.143350	0.141660	0.113463	-4	-6	-6	-6	-4	-6	-6	-7	-6	8	-1	-6	-1	-2	-6	-5	-3	-5	-2	2	3	0	-3	-3	-2	0	-1	-3
2	0.002588	0.003481	0.003945	0.004694	0.005642	0.009613	0.014646	0.021096	0.032498	0.042095	0.054727	0.060866	0.081342	0.097145	0.125896	0.149963	0.164371	0.172357	0.187872	0.197818	0.201873	-1	-3	-4	-5	1	-3	-5	-5	-5	1	2	-4	-2	-4	-5	3	-1	-5	-4	4	-2	7	2	-3	-4	1	-2	0
2	0.009613	0.014646	0.021096	0.032498	0.042095	0.054727	0.060866	0.081342	0.097145	0.125896	0.149963	0.164371	0.172357	0.187872	0.197818	0.201873	0.222765	0.235624	0.241655	0.243659	0.252507	1	-5	-6	-6	1	-4	-5	-5	-6	3	-1	-3	0	-4	-5	-4	-3	-6	-4	6	1	-4	-5	-5	-1	-4	-5	-5
2	0.324649	0.360744	0.426180	0.471508	0.532526	0.564668	0.609704	0.650037	0.683772	0.727328	0.757031	0.783338	0.808983	0.826332	0.850052	0.867028	0.885236	0.894857	0.903137	0.914705	0.925268	2	-1	-2	-1	-3	-2	-1	-2	-1	-2	-1	-2	-2	-2	5	0	-1	-2	4	-2	0	-1	-2	-1	1	-2	-3	-3
2	0.683772	0.727328	0.757031	0.783338	0.808983	0.826332	0.850052	0.867028	0.885236	0.894857	0.903137	0.914705	0.925268	0.931897	0.932752	0.938959	0.944054	0.950733	0.953423	0.957803	0.963855	-2	6	-2	-4	-5	1	-2	-4	-2	-3	-3	2	-3	-3	-3	-2	-1	8	-2	-4	-1	-1	0	4	-4	0	2	-3
2	0.336456	0.383755	0.445318	0.499147	0.518137	0.530008	0.545338	0.502427	0.453186	0.378684	0.302109	0.237453	0.197853	0.150975	0.143350	0.141660	0.113463	0.093454	0.078272	0.065833	0.062567	1	-2	-2	-1	-4	-3	-1	5	-1	-3	-1	-2	-4	-4	-4	0	-1	-5	-4	-3	1	0	-1	1	-2	1	2	-1
2	0.808983	0.826332	0.850052	0.867028	0.885236	0.894857	0.903137	0.914705	0.925268	0.931897	0.932752	0.938959	0.944054	0.950733	0.953423	0.957803	0.963855	0.968039	0.970501	0.972400	0.975517	-1	5	0	-3	2	0	-2	-3	0	-3	-2	-1	0	-1	-4	0	2	-3	3	-2	2	0	4	-1	-3	0	0	-2
2	0.925268	0.931897	0.932752	0.938959	0.944054	0.950733	0.953423	0.957803	0.963855	0.968039	0.970501	0.972400	0.975517	0.978953	0.981563	0	0	0	0	0	0	0	-1	-2	1	-2	1	4	-3	0	-1	-4	2	-2	-5	3	-1	-1	-5	-4	-2	-3	7	-1	-3	-5	0	0	-4
2	0.944054	0.950733	0.953423	0.957803	0.963855	0.968039	0.970501	0.972400	0.975517	0.978953	0.981563	0	0	0	0	0	0	0	0	0	0	-3	-3	-3	-4	-4	2	-2	-2	1	-3	-2	-3	-2	1	-4	-3	-3	0	8	-3	-1	0	1	5	-4	2	1	-1
2	0.502427	0.453186	0.378684	0.302109	0.237453	0.197853	0.150975	0.143350	0.141660	0.113463	0.093454	0.078272	0.065833	0.062567	0.061740	0.062455	0.066474	0.060832	0.055056	0.056653	0.060638	2	-1	-1	3	-4	0	3	1	-2	-4	-3	-2	-3	-4	0	1	0	-4	-3	-3	4	-3	0	1	1	-2	-1	4
2	0.197960	0.178925	0.195341	0.218142	0.251678	0.275550	0.311158	0.326622	0.351337	0.356862	0.364519	0.349933	0.357370	0.351818	0.349660	0.378962	0.399667	0.413135	0.415240	0.412906	0.414050	-2	-3	-4	-4	-2	-3	-3	-4	-3	1	5	-3	2	0	-3	-3	-2	-2	-2	0	-2	-2	-2	-1	-2	0	3	-3
2	0.317211	0.303366	0.273331	0.256478	0.240906	0.227278	0.213946	0.209670	0.195571	0.200476	0.235547	0.238192	0.234642	0.250535	0.250596	0.261501	0.258097	0.271088	0.233782	0.229090	0.253095	-2	-2	-2	-3	-3	-2	-2	-3	5	-2	-2	-2	-1	3	-3	-2	-2	1	7	-2	-1	-2	3	4	-4	-1	1	4
2	0.261501	0.258097	0.271088	0.233782	0.229090	0.253095	0.280114	0.325557	0.374136	0.408256	0.429524	0.450055	0.456690	0.432065	0.417320	0.404711	0.406728	0.425010	0.439469	0.491779	0.534030	-2	5	-2	-3	-3	0	-1	-3	-2	-1	2	1	0	-2	-3	-2	-2	-3	-2	-1	-1	-2	1	5	-3	-1	1	-1
2	0.258097	0.271088	0.233782	0.229090	0.253095	0.280114	0.325557	0.374136	0.408256	0.429524	0.450055	0.456690	0.432065	0.417320	0.404711	0.406728	0.425010	0.439469	0.491779	0.534030	0.561632	-1	-2	1	5	-3	-1	1	-1	-1	-3	-4	-1	-3	-4	-2	3	0	-4	-3	-3	3	-2	-3	-3	-1	-2	-2	-2
2	0.449227	0.396001	0.374597	0.390537	0.436700	0.484208	0.529445	0.554456	0.585690	0.549707	0.528950	0.496382	0.474128	0.441979	0.423006	0.378148	0.341662	0.325812	0.321106	0.301197	0.325940	-2	-3	-3	-4	-3	-3	-3	-4	0	-1	-1	-3	-1	5	-4	-2	-2	1	7	-2	-2	4	-2	-3	-3	-1	-2	-4
2	0.533524	0.514020	0.487605	0.481259	0.483731	0.463280	0.452171	0.438210	0.419873	0.425383	0.415136	0.393525	0.388526	0.366542	0.374884	0.364091	0.357090	0.349971	0.355615	0.352969	0.363860	-1	-3	-4	-4	-2	-3	-3	-4	-4	2	4	-3	1	0	-3	-3	-1	-3	-2	3	-2	-2	4	-1	-3	-2	-2	-2
2	0.396001	0.374597	0.390537	0.436700	0.484208	0.529445	0.554456	0.585690	0.549707	0.528950	0.496382	0.474128	0.441979	0.423006	0.378148	0.341662	0.325812	0.321106	0.301197	0.325940	0.328486	-2	4	-2	-3	-3	-1	-2	-4	-2	0	3	0	1	-1	-3	-2	-2	-3	-2	-1	-1	-3	-4	-4	-2	-3	-3	-4
2	0.452171	0.438210	0.419873	0.425383	0.415136	0.393525	0.388526	0.366542	0.374884	0.364091	0.357090	0.349971	0.355615	0.352969	0.363860	0.387391	0.420222	0.436118	0.434678	0.432622	0.412259	-1	-2	-2	-3	-2	-1	-3	-3	-3	1	3	-2	5	-1	-3	-1	2	-2	-2	0	-2	4	-2	-2	-4	-1	-1	-3
2	0.355615	0.352969	0.363860	0.387391	0.420222	0.436118	0.434678	0.432622	0.412259	0.384613	0.366172	0.338540	0.316234	0.279843	0.261907	0.248204	0.249327	0.232710	0.222014	0.227916	0.248353	4	-2	-2	-3	-1	-2	-2	-1	-2	0	-1	-1	-1	-2	-2	0	0	-3	-2	2	-2	-3	-4	-4	-2	-3	-3	-4
2	0.338540	0.316234	0.279843	0.261907	0.248204	0.249327	0.232710	0.222014	0.227916	0.248353	0.271999	0.297724	0.350480	0.411022	0.454520	0.493788	0.505999	0.524922	0.512224	0.489667	0.462244	-2	5	-2	-3	-3	0	-1	-3	-2	3	0	1	0	-2	-3	-2	-1	-3	-2	0	-1	0	-1	-1	-2	0	0	-2
2	0.249327	0.232710	0.222014	0.227916	0.248353	0.271999	0.297724	0.350480	0.411022	0.454520	0.493788	0.505999	0.524922	0.512224	0.489667	0.462244	0.425960	0.366511	0.311413	0.258917	0.215405	-1	-3	-4	-4	-1	-3	-3	-4	-4	2	3	-3	1	-1	-3	-2	-1	-3	-2	4	-2	-1	7	1	-3	0	-1	-1
2	0.222014	0.227916	0.248353	0.271999	0.297724	0.350480	0.411022	0.454520	0.493788	0.505999	0.524922	0.512224	0.489667	0.462244	0.425960	0.366511	0.311413	0.258917	0.215405	0.173663	0.137341	3	-2	-3	-3	-1	-2	-2	-2	-3	0	3	-2	1	-1	-2	-1	-1	-3	-2	0	0	-2	0	-2	-1	-1	-1	-2
2	0.248353	0.271999	0.297724	0.350480	0.411022	0.454520	0.493788	0.505999	0.524922	0.512224	0.489667	0.462244	0.425960	0.366511	0.311413	0.258917	0.215405	0.173663	0.137341	0.109787	0.093101	0	-3	-1	-2	-3	-2	-3	6	-3	-4	-4	-2	-3	-4	-3	-1	-2	-3	-4	-4	-1	1	-1	-1	-2	0	0	-2
2	0.363150	0.283349	0.232321	0.184207	0.147078	0.128341	0.120992	0.116545	0.126396	0.130193	0.143071	0.150686	0.151131	0.155278	0.160506	0.168109	0.165651	0.164482	0.161567	0.165688	0.164035	-2	-1	-1	-3	-3	-1	-2	-3	6	-3	-2	-2	-2	2	-3	-2	-2	1	6	-2	0	-3	-1	-2	-3	-2	-3	6
2	0.483776	0.476606	0.466689	0.452545	0.430524	0.434208	0.426249	0.416010	0.396831	0.358814	0.340104	0.312305	0.299257	0.309380	0.282571	0.302253	0.376880	0.438269	0.529024	0.626031	0.702315	1	-1	-1	2	-3	1	5	-2	-1	-3	-3	0	-2	-4	-2	0	-1	-4	-3	-2	5	-2	-2	-2	-1	-1	-1	0
2	0.369226	0.376377	0.378529	0.414668	0.453344	0.486666	0.500061	0.526802	0.526335	0.516640	0.486943	0.467003	0.423678	0.385119	0.367551	0.370502	0.399154	0.452026	0.515592	0.548931	0.573746	-1	-3	-4	-4	-2	-3	-3	-4	-4	2	4	-3	1	0	-3	-3	-1	-3	-2	3	-2	-3	-3	-3	-3	-2	-2	-3
2	0.378529	0.414668	0.453344	0.486666	0.500061	0.526802	0.526335	0.516640	0.486943	0.467003	0.423678	0.385119	0.367551	0.370502	0.399154	0.452026	0.515592	0.548931	0.573746	0.593136	0.601596	2	-1	-1	-2	-2	3	-1	-2	-2	-1	0	-1	-1	-2	-2	0	3	-3	-2	-1	-2	-2	-1	4	-3	-2	-1	-3
2	0.610432	0.652133	0.665053	0.659906	0.645577	0.586712	0.535316	0.469345	0.424597	0.370117	0.321547	0.291634	0.261797	0.212273	0.172431	0.146077	0.116100	0.092986	0.090607	0.096289	0.093660	-1	-1	-1	2	-4	1	5	3	-1	-4	-4	0	-3	-4	-2	-1	-2	-3	-3	-3	0	-1	2	2	-3	1	4	-2
2	0.659906	0.645577	0.586712	0.535316	0.469345	0.424597	0.370117	0.321547	0.291634	0.261797	0.212273	0.172431	0.146077	0.116100	0.092986	0.090607	0.096289	0.093660	0.096402	0.102802	0.110445	-1	5	-1	-1	-2	2	0	-2	-1	-2	-2	1	-1	-2	2	-1	-1	-2	-2	-2	1	-2	-2	-2	-1	-1	-1	-1
2	0.424597	0.370117	0.321547	0.291634	0.261797	0.212273	0.172431	0.146077	0.116100	0.092986	0.090607	0.096289	0.093660	0.096402	0.102802	0.110445	0.111760	0.119823	0.134730	0.157390	0.199933	-1	-1	-2	-2	-1	-1	-1	-2	-1	0	0	-2	0	5	-1	-1	-1	0	1	1	0	-1	0	1	-2	-1	-1	5
2	0.218980	0.215587	0.203198	0.168147	0.147995	0.148237	0.149707	0.164865	0.191990	0.220343	0.246706	0.268181	0.262776	0.252221	0.252090	0.248056	0.238387	0.229620	0.227318	0.197960	0.178925	-2	-3	-4	-4	-2	-3	-4	-4	-2	2	2	-3	1	5	-4	-3	-2	-1	1	0	-1	-2	-2	-2	-2	-1	-1	-2
2	0.034404	0.033035	0.033144	0.033764	0.045974	0.071466	0.095087	0.164033	0.240104	0.310806	0.376309	0.423022	0.411400	0.363714	0.322551	0.246169	0.186371	0.137493	0.111100	0.070501	0.056203	0	5	-1	-3	2	0	-2	-5	-2	-1	0	2	-1	-2	-4	-2	0	-5	-3	1	-5	-6	-6	-6	-5	-6	-6	-6
2	0.038368	0.028185	0.022501	0.018803	0.015146	0.014785	0.014198	0.018439	0.031469	0.044371	0.060219	0.072500	0.086068	0.099565	0.131502	0.140672	0.162719	0.169405	0.172153	0.177048	0.182858	-3	-5	-5	-6	-4	-4	-5	-6	-4	-1	3	-5	9	0	-6	-4	-3	-4	-4	-1	-1	1	-2	-3	-3	1	0	-3
2	0.131777	0.134126	0.134868	0.123065	0.100716	0.085154	0.063752	0.041112	0.031846	0.023448	0.015741	0.012129	0.009914	0.009442	0.010981	0.011809	0.012717	0.015342	0.020552	0.024992	0.023951	-1	-2	-2	-3	-4	3	-3	-1	-4	-5	-5	-1	-3	-5	4	5	0	-6	-3	-4	-2	-4	6	0	-3	-2	-1	4
2	0.096396	0.087196	0.077032	0.055187	0.033936	0.021050	0.012604	0.008750	0.007803	0.007914	0.008510	0.009437	0.009229	0.008605	0.008039	0.008121	0.008523	0.010353	0.013959	0.017302	0.023563	4	-4	-4	-4	-1	-2	-4	-2	0	2	1	-3	-1	-4	-3	0	0	-5	-3	2	-1	-2	-1	-2	-4	-2	-3	3
2	0.181373	0.165126	0.164724	0.147944	0.134310	0.131750	0.115717	0.089150	0.073316	0.059255	0.037203	0.028353	0.024664	0.018597	0.018931	0.018353	0.017390	0.017657	0.017390	0.016464	0.016752	-2	1	5	-2	-5	0	0	0	2	-2	-3	4	-4	-4	-2	-3	-2	-2	-3	-4	-1	4	-1	-4	-6	2	1	0
2	0.020891	0.027836	0.035835	0.044634	0.059181	0.073762	0.086913	0.096167	0.105700	0.110891	0.117861	0.127739	0.145623	0.173381	0.237482	0.321950	0.426565	0.545038	0.660250	0.748286	0.803296	5	-5	-3	-1	-3	-4	-4	3	-5	-3	-5	-4	-3	-4	-4	0	2	-1	-2	-2	-1	4	0	-1	-5	2	0	-4
2	0.306314	0.305286	0.284316	0.248552	0.232240	0.209302	0.208893	0.232497	0.271578	0.308479	0.357569	0.419274	0.459223	0.491195	0.526920	0.561817	0.603264	0.633333	0.660536	0.653641	0.618042	0	-4	1	-1	-4	-3	-3	-1	-4	-4	-4	-3	0	-5	-4	5	5	-5	0	-4	3	-4	-2	-4	-1	-2	-4	-3
2	0.209302	0.208893	0.232497	0.271578	0.308479	0.357569	0.419274	0.459223	0.491195	0.526920	0.561817	0.603264	0.633333	0.660536	0.653641	0.618042	0.563927	0.543417	0.417209	0.383370	0.355200	3	-4	-4	-5	-3	-4	-3	-1	-5	3	0	-4	-1	-3	-1	-3	-1	-5	-1	4	0	1	1	0	-5	1	0	0
2	0.633333	0.660536	0.653641	0.618042	0.563927	0.543417	0.417209	0.383370	0.355200	0.348317	0.338196	0.347219	0.337146	0.333013	0.322105	0.297394	0.266944	0.258335	0.240403	0.212063	0.193864	-1	-2	1	-1	-5	-2	-2	0	2	-1	-2	-1	-2	-5	6	-2	-1	1	-4	-2	-1	-2	-5	-5	0	-2	-4	-5
2	0.266944	0.258335	0.240403	0.212063	0.193864	0.170534	0.157817	0.153860	0.180506	0.205862	0.230742	0.261460	0.292164	0.311962	0.318232	0.307808	0.282579	0.236953	0.175390	0.120383	0.082639	-1	-1	0	2	-5	0	4	-1	-4	-4	-3	0	-1	-1	-1	0	2	-6	-5	0	1	0	-1	-1	-5	3	2	-2
2	0.230742	0.261460	0.292164	0.311962	0.318232	0.307808	0.282579	0.236953	0.175390	0.120383	0.082639	0.044166	0.023177	0.014032	0.009641	0.006954	0.005902	0.005850	0.005726	0.005821	0.005364	-2	0	-1	2	-5	0	-1	0	-2	-4	-4	6	-3	-5	-3	-2	-2	-5	-4	-4	0	-2	-1	-2	-2	-2	-2	-3
2	0.090909	0.092791	0.103576	0.114715	0.134349	0.159793	0.185747	0.231888	0.293259	0.340970	0.372535	0.428859	0.488762	0.515939	0.545902	0.564998	0.562464	0.523633	0.506595	0.500741	0.492749	3	-4	-4	-5	0	-4	-4	0	-5	1	2	-4	-1	1	-4	1	2	-5	-3	2	1	-4	-4	-4	3	0	-4	0
2	0.603867	0.639320	0.607423	0.561382	0.476203	0.405173	0.331318	0.294122	0.265386	0.262899	0.274275	0.282629	0.311133	0.352567	0.419661	0.508902	0.588620	0.655015	0.725111	0.735058	0.722288	2	-1	0	3	-4	0	1	0	-1	-1	-2	-2	-1	-4	1	1	0	-5	-2	-1	0	-4	1	3	-5	-2	-2	4
2	0.476203	0.405173	0.331318	0.294122	0.265386	0.262899	0.274275	0.282629	0.311133	0.352567	0.419661	0.508902	0.588620	0.655015	0.725111	0.735058	0.722288	0	0	0	0	2	-1	-3	-5	-3	-1	-3	-4	-2	1	2	3	-2	-2	-4	-1	0	-5	-2	2	4	6	-2	-4	-4	-2	-2	-1
2	0.294122	0.265386	0.262899	0.274275	0.282629	0.311133	0.352567	0.419661	0.508902	0.588620	0.655015	0.725111	0.735058	0.722288	0	0	0	0	0	0	0	2	-2	-1	0	-5	1	3	-2	-4	-4	-3	0	-4	-5	4	0	-1	-6	-3	-3	-2	-3	-6	-6	-4	-5	-2	-6
2	0.185747	0.231888	0.293259	0.340970	0.372535	0.428859	0.488762	0.515939	0.545902	0.564998	0.562464	0.523633	0.506595	0.500741	0.492749	0.479193	0.467167	0.451094	0.428913	0.395084	0.335032	1	-4	-3	-4	-4	-1	-2	-2	-2	-4	-1	0	-1	0	5	1	2	-5	-3	-4	5	-4	-1	-4	-1	-2	-2	-2
2	0.562464	0.523633	0.506595	0.500741	0.492749	0.479193	0.467167	0.451094	0.428913	0.395084	0.335032	0.278478	0.237628	0.186807	0.161035	0.163020	0.172051	0.182766	0.192109	0.198728	0.208576	0	1	-2	-2	-4	1	2	-2	-3	-1	-1	1	-1	-2	2	1	1	-1	-3	1	0	-1	2	4	-4	0	2	-2
2	0.237628	0.186807	0.161035	0.163020	0.172051	0.182766	0.192109	0.198728	0.208576	0.224748	0.229572	0.242649	0.254148	0.273738	0.289001	0.310568	0.314830	0.333496	0.297912	0.259770	0.218541	-1	-1	2	3	-4	3	2	-2	-1	-4	-4	3	-3	-4	-3	2	1	-4	-4	-3	-1	-4	0	-3	-1	-3	-4	7
2	0.224748	0.229572	0.242649	0.254148	0.273738	0.289001	0.310568	0.314830	0.333496	0.297912	0.259770	0.218541	0.188435	0.147240	0.140752	0.132897	0.114059	0.098515	0.091221	0.082901	0.075056	1	1	4	0	-5	1	1	-1	-1	-4	-4	3	-1	-5	-4	1	0	-6	-3	-5	-1	1	4	2	-5	1	1	-1
2	0.023127	0.027590	0.027964	0.028705	0.043992	0.071308	0.106129	0.143377	0.182813	0.212877	0.244432	0.278684	0.310480	0.323600	0.323135	0.306302	0.261691	0.233317	0.231394	0.213560	0.185838	5	-4	-4	-4	-4	-4	-3	0	-5	-4	-2	-4	-1	-3	-4	3	1	-6	-5	-2	2	-5	-6	-6	-4	-5	-4	-4
2	0.143377	0.182813	0.212877	0.244432	0.278684	0.310480	0.323600	0.323135	0.306302	0.261691	0.233317	0.231394	0.213560	0.185838	0.178699	0.152921	0.141701	0.165725	0.192639	0.199595	0.217983	-3	-2	1	-2	-6	-3	-2	6	0	-7	-6	1	-3	-6	-5	-3	-4	-6	-4	-6	1	-4	-5	-4	-4	-2	-4	-5
2	0.100774	0.105483	0.106135	0.130826	0.146571	0.154501	0.184812	0.240872	0.293702	0.331751	0.360953	0.359747	0.318359	0.280894	0.254382	0.232155	0.233529	0.256699	0.273230	0.302965	0.366547	-3	-4	4	-3	-4	-2	-2	-5	-4	3	0	-4	-1	-4	-5	-3	-1	-5	-4	5	-4	-5	-2	-5	-4	-5	-5	-6
2	0.106135	0.130826	0.146571	0.154501	0.184812	0.240872	0.293702	0.331751	0.360953	0.359747	0.318359	0.280894	0.254382	0.232155	0.233529	0.256699	0.273230	0.302965	0.366547	0.425502	0.462971	-4	-3	0	-3	-5	-2	-1	-4	10	-5	-2	-3	-4	-4	-4	-3	-4	-5	-1	-5	0	-5	-5	-5	-4	-4	-5	-1
2	0.230455	0.181874	0.142104	0.108534	0.085015	0.090549	0.101844	0.111180	0.119766	0.127270	0.125517	0.121936	0.114804	0.090933	0.069195	0.050125	0.033798	0.027676	0.030091	0.034540	0.036382	-2	-3	-2	5	-6	-2	5	2	-3	-6	-6	-2	-5	-5	-4	-1	-3	-5	-1	-5	-2	3	-2	-2	-5	-2	0	-4
2	0.252579	0.287699	0.355685	0.415093	0.456869	0.514696	0.579788	0.642595	0.711609	0.777931	0.827784	0.837339	0.833552	0.830435	0.793360	0.690420	0.566990	0.459956	0.379867	0.308926	0.254295	-1	-3	-4	-4	-5	4	-2	-4	-3	-2	-3	0	0	-5	7	-3	-3	-5	-1	-2	-3	-1	-3	-4	-5	-2	0	-3
2	0.287699	0.355685	0.415093	0.456869	0.514696	0.579788	0.642595	0.711609	0.777931	0.827784	0.837339	0.833552	0.830435	0.793360	0.690420	0.566990	0.459956	0.379867	0.308926	0.254295	0.223947	-3	-1	-3	-4	-5	-2	0	-3	0	-2	1	6	-1	-4	-1	-3	-1	-5	1	1	-2	-4	-5	-5	1	-1	-4	-2
2	0.053843	0.058042	0.066013	0.066103	0.065282	0.073003	0.089778	0.094665	0.119240	0.159938	0.218798	0.287446	0.378164	0.479683	0.584716	0.686196	0.768432	0.841192	0.877599	0.901595	0	1	2	0	2	-5	0	1	1	0	-3	-3	3	-4	-3	2	-2	-2	-1	-4	-3	-1	1	-1	3	-3	0	0	3
2	0.066013	0.066103	0.065282	0.073003	0.089778	0.094665	0.119240	0.159938	0.218798	0.287446	0.378164	0.479683	0.584716	0.686196	0.768432	0.841192	0.877599	0.901595	0	0	0	0	-1	1	5	-5	0	2	-4	0	-4	-5	-2	-2	-5	1	1	1	-5	-4	-2	0	-4	-5	-5	-4	-4	-4	-5
2	0.396631	0.378475	0.369245	0.400195	0.415479	0.404676	0.392320	0.367173	0.308093	0.243578	0.188652	0.147027	0.118759	0.108714	0.104294	0.096635	0.073473	0.068095	0.057131	0.045499	0.038592	4	1	-3	0	-3	-2	-2	-1	-3	-4	-2	3	0	-4	-3	2	0	-5	-4	-3	-2	1	3	-1	-4	3	-1	-2
2	0.083882	0.086674	0.081619	0.079200	0.069588	0.072362	0.093572	0.115616	0.139309	0.157242	0.158239	0.134662	0.105380	0.074325	0.048622	0.035201	0.025492	0.022950	0.021159	0.019922	0.020657	1	-4	-1	-2	-1	0	-3	2	-4	-2	-1	-2	-3	-4	4	-1	-1	-6	-4	3	1	-3	0	-3	1	1	0	-2
2	0.025489	0.043043	0.067522	0.090844	0.114440	0.139212	0.172218	0.194259	0.209664	0.209630	0.197964	0.160661	0.125851	0.091773	0.067679	0.052301	0.043875	0.036679	0.037065	0.047643	0.055603	2	-5	-3	-1	0	-4	-4	6	-5	-1	-4	-4	-2	-5	-2	0	-2	-5	-4	-1	2	-3	-5	-5	-4	-2	-4	0
2	0.114440	0.139212	0.172218	0.194259	0.209664	0.209630	0.197964	0.160661	0.125851	0.091773	0.067679	0.052301	0.043875	0.036679	0.037065	0.047643	0.055603	0.058243	0.063537	0.071902	0.093554	-1	0	1	4	-5	1	3	1	-3	-4	-4	1	-3	-4	-3	0	-2	4	-2	-2	-3	-1	6	0	-5	1	2	-2
2	0.076600	0.053375	0.049904	0.050283	0.053975	0.072683	0.094438	0.108129	0.118687	0.119910	0.104108	0.085984	0.078342	0.072862	0.069659	0.067378	0.057097	0.041505	0.025211	0.016886	0.012782	-4	-6	-6	-6	-4	-6	-6	-7	-6	7	3	-6	-1	0	-6	-5	-4	-5	-3	2	-3	5	-3	-3	-6	1	-1	-5
2	0.161739	0.207733	0.267445	0.330335	0.378483	0.434249	0.491879	0.531090	0.524144	0.540993	0.535515	0.494504	0.432150	0.384207	0.315767	0.242444	0.200970	0.173496	0.136288	0.109340	0.091317	1	-3	-1	2	-3	-2	-2	-3	2	-3	-3	-2	-3	-2	1	3	0	-3	5	-3	-2	-2	-1	3	-1	-2	-1	1
2	0.434249	0.491879	0.531090	0.524144	0.540993	0.535515	0.494504	0.432150	0.384207	0.315767	0.242444	0.200970	0.173496	0.136288	0.109340	0.091317	0.070952	0.054189	0.051987	0.048261	0.044887	-3	-1	-5	-5	1	1	0	-2	-1	-1	3	-1	5	2	0	-2	-2	-2	0	-1	-2	-1	-2	-2	1	-1	-3	-2
2	0.091317	0.070952	0.054189	0.051987	0.048261	0.044887	0.049221	0.068467	0.077210	0.087800	0.106675	0.123903	0.124136	0.139817	0.168838	0.191184	0.241918	0.318956	0.380857	0.426936	0.494020	1	-4	0	-4	2	-3	-4	-1	1	0	3	-4	0	3	-5	-1	2	-4	-1	0	-3	0	3	4	-6	-2	-2	5
2	0.077210	0.087800	0.106675	0.123903	0.124136	0.139817	0.168838	0.191184	0.241918	0.318956	0.380857	0.426936	0.494020	0.544358	0.555109	0.595790	0.620189	0.639123	0.616578	0.617403	0.563625	5	-5	-5	-5	8	-4	-1	-3	-5	-3	-4	-4	-4	-5	-2	0	-2	-6	-5	-2	-4	-3	-3	-1	-7	1	8	-5
2	0.124136	0.139817	0.168838	0.191184	0.241918	0.318956	0.380857	0.426936	0.494020	0.544358	0.555109	0.595790	0.620189	0.639123	0.616578	0.617403	0.563625	0.500255	0.441691	0.403334	0.359390	1	0	0	3	-5	-1	1	0	0	-2	-4	-2	-3	-3	0	2	1	-5	0	-4	0	1	-5	-5	-1	-3	-5	-5
2	0.168838	0.191184	0.241918	0.318956	0.380857	0.426936	0.494020	0.544358	0.555109	0.595790	0.620189	0.639123	0.616578	0.617403	0.563625	0.500255	0.441691	0.403334	0.359390	0.314737	0.263414	-2	-3	-4	-5	1	-4	-5	-5	-4	5	1	-4	0	-1	-5	-1	1	-4	-3	3	1	2	1	3	-4	1	1	-1
2	0	0	0	0	0	0	0	0	0	0.330419	0.266649	0.225195	0.144536	0.076600	0.053375	0.049904	0.050283	0.053975	0.072683	0.094438	0.108129	0	0	0	0	0	0	0	0	0	0	0	0	0	0	0	0	0	0	0	0	0	0	0	0	0	0	0	0
2	0.007964	0.006860	0.006279	0.006095	0.007133	0.009713	0.013284	0.024550	0.038601	0.049618	0.064400	0.073526	0.079839	0.079219	0.084003	0.088915	0.098490	0.098636	0.104636	0.097921	0.082145	-2	5	-3	-2	-4	0	-3	-4	5	-6	-5	1	-4	-6	5	-3	-2	-3	-4	-5	-1	-5	-6	-6	0	-5	-6	-5
2	0.084003	0.088915	0.098490	0.098636	0.104636	0.097921	0.082145	0.066793	0.052053	0.035280	0.029951	0.025168	0.020103	0.017301	0.013941	0.008345	0.005354	0.002869	0.001966	0.001796	0.002685	1	-3	-5	-5	-4	-1	1	-5	-2	2	4	-3	3	1	-4	-4	-2	-3	0	0	-2	-6	-6	-6	-3	-5	-6	-6
2	0.075496	0.084937	0.081145	0.072404	0.060274	0.053823	0.043509	0.041403	0.051107	0.058981	0.062776	0.063701	0.062956	0.052796	0.052543	0.059618	0.068960	0.085781	0.099268	0.114225	0.121342	-1	0	-1	4	-6	0	5	-3	-2	-6	-6	0	-3	-6	-2	2	-1	-6	-5	-4	1	-1	0	5	2	-1	2	-4
2	0.043509	0.041403	0.051107	0.058981	0.062776	0.063701	0.062956	0.052796	0.052543	0.059618	0.068960	0.085781	0.099268	0.114225	0.121342	0.121685	0.107157	0.095982	0.074372	0.054660	0.043568	1	-3	2	4	-5	-3	-3	5	-3	-6	-6	-1	-5	-5	-5	-1	-4	-6	-6	-6	3	-2	0	-4	-3	-3	-4	1
2	0.041403	0.051107	0.058981	0.062776	0.063701	0.062956	0.052796	0.052543	0.059618	0.068960	0.085781	0.099268	0.114225	0.121342	0.121685	0.107157	0.095982	0.074372	0.054660	0.043568	0.041844	3	-2	0	-4	-3	-3	-4	1	-1	-4	-4	-3	-2	-5	3	1	4	-6	-4	-3	-1	2	3	-2	-3	0	-2	-4
2	0.047585	0.042252	0.050173	0.051202	0.081217	0.099388	0.123970	0.157904	0.189081	0.207076	0.241990	0.260828	0.259925	0.244076	0.238584	0.210252	0.201349	0.195909	0.195941	0.178838	0.170032	-2	-4	-2	-4	-3	-3	-4	-4	-4	-4	-5	-3	-4	-5	-4	4	7	-6	-5	-3	-5	-5	-1	8	-7	-3	-1	-4
2	0.066437	0.068254	0.068324	0.090181	0.141377	0.174719	0.185591	0.182917	0.165276	0.114412	0.071871	0.055748	0.048600	0.040524	0.040555	0.042225	0.043625	0.050508	0.054338	0.058002	0.060961	-3	2	0	-2	-6	-3	-3	6	-1	-7	-6	0	-5	-6	-5	-3	-4	-6	-6	-6	-3	5	-2	-3	-4	-1	-2	1
2	0.040524	0.040555	0.042225	0.043625	0.050508	0.054338	0.058002	0.060961	0.073263	0.092915	0.108406	0.114718	0.116410	0.101939	0.075651	0.051578	0.033110	0.019722	0.013056	0.008041	0.005817	1	-1	-4	-2	0	-2	2	-4	4	0	-2	-1	-2	-1	-5	-1	4	-1	2	-1	1	2	6	-2	-5	-1	-2	1
2	0.003881	0.003588	0.004406	0.006056	0.007182	0.008623	0.012149	0.023374	0.046753	0.068351	0.103551	0.146358	0.224165	0.277296	0.345846	0.404648	0.452288	0.447331	0.444093	0.461709	0.500214	-3	-4	-3	-4	-2	-4	-4	-5	-5	-3	-4	-4	-3	-5	-4	-1	7	-6	-5	2	-4	-5	-6	-6	-4	-5	-6	-6
2	0.044402	0.057589	0.078335	0.114613	0.129839	0.150539	0.170081	0.170960	0.158067	0.150129	0.129049	0.116144	0.109283	0.094944	0.084461	0.078014	0.067759	0.054591	0.044069	0.035913	0.029306	-2	-5	-5	-5	0	-5	-5	-6	-6	0	-2	-5	-3	-4	-5	-3	4	-6	-4	6	-5	-3	-2	-4	-6	-2	-3	-5
2	0.076674	0.085101	0.092898	0.086640	0.076881	0.078352	0.091396	0.105795	0.131529	0.152080	0.158267	0.146209	0.123541	0.093120	0.066089	0.044984	0.031427	0.021914	0.016071	0.011618	0.008494	-1	-3	-2	-1	3	2	2	-2	0	-1	-4	-2	0	-5	2	-1	4	-6	-4	1	-2	-1	0	4	-3	-3	-2	-2
2	0.092898	0.086640	0.076881	0.078352	0.091396	0.105795	0.131529	0.152080	0.158267	0.146209	0.123541	0.093120	0.066089	0.044984	0.031427	0.021914	0.016071	0.011618	0.008494	0.006340	0.005077	-3	-3	1	1	-3	-4	-4	-4	-3	0	4	-4	1	-3	-2	1	3	-4	-2	-1	0	2	-5	-3	-3	0	-1	-3
2	0.011618	0.008494	0.006340	0.005077	0.003935	0.003648	0.005815	0.014412	0.033197	0.056226	0.082685	0.130799	0.188027	0.221407	0.251146	0.275785	0.267730	0.232098	0.203177	0.169605	0.131314	-1	-6	-6	-6	8	-5	-6	-5	-6	4	-2	-5	-1	-4	-5	-2	-1	-6	-5	4	-5	1	2	8	-7	-3	-2	-4
2	0.003935	0.003648	0.005815	0.014412	0.033197	0.056226	0.082685	0.130799	0.188027	0.221407	0.251146	0.275785	0.267730	0.232098	0.203177	0.169605	0.131314	0.094698	0.068542	0.049301	0.032193	-5	-5	-6	-6	-5	0	-5	-6	-2	0	3	-5	-1	7	2	-3	-4	-3	1	-2	-4	-4	-1	-5	-6	-3	-4	-5
2	0.012837	0.010498	0.009854	0.008976	0.009193	0.011538	0.018170	0.025363	0.033327	0.043903	0.057103	0.071611	0.104022	0.152983	0.218729	0.283722	0.347963	0.393543	0.393560	0.354473	0.308428	1	-5	-5	-6	4	-5	-5	-5	-2	4	-1	-5	-1	-4	-5	-4	-2	-5	0	5	0	-1	4	-4	4	-3	-4	-4
2	0.058054	0.059920	0.070539	0.076910	0.076696	0.075223	0.072059	0.063777	0.061594	0.069201	0.074217	0.072645	0.070729	0.062358	0.047028	0.033386	0.030561	0.028010	0.032610	0.050287	0.086563	1	-2	-3	-4	0	-3	-4	7	-5	-6	-6	-4	-4	-6	-4	-2	-2	-6	-6	-5	-3	4	-1	-2	-4	0	-1	-4
2	0.393560	0.354473	0.308428	0.247157	0.182631	0.167843	0.168604	0.165804	0.178795	0.187237	0.161925	0.131703	0.110694	0.076350	0.049453	0.037310	0.033965	0.029721	0.030993	0.033051	0.031781	2	-1	-1	2	-3	-1	3	3	-1	-5	-4	-2	-3	-3	-2	1	-1	-3	0	-3	-1	-2	-2	2	-5	4	3	-1
2	0.033161	0.035360	0.036786	0.046706	0.063949	0.078301	0.108949	0.162369	0.224406	0.292550	0.338219	0.389456	0.418690	0.437894	0.449060	0.474885	0.471896	0.486537	0.464250	0.434224	0.414396	-3	-4	7	5	-6	-3	-1	-3	-2	-6	-6	-3	-4	-6	-5	-1	-3	-7	-4	-5	0	-3	1	2	-3	-1	1	4
2	0.108949	0.162369	0.224406	0.292550	0.338219	0.389456	0.418690	0.437894	0.449060	0.474885	0.471896	0.486537	0.464250	0.434224	0.414396	0.386011	0.315107	0.273197	0.240396	0.225672	0.201833	0	3	-2	-1	-4	0	3	-2	1	-2	-2	0	-2	0	-3	-2	-2	5	3	-1	-1	0	1	-4	-2	-1	0	0
2	0.016760	0.016825	0.016405	0.016412	0.015970	0.014961	0.013774	0.013296	0.017750	0.029392	0.038677	0.051763	0.075138	0.105448	0.116333	0.144394	0.151192	0.140452	0.114857	0.098799	0.067354	3	0	-3	-5	7	-3	-4	-2	-2	-2	-4	-1	-4	-4	-5	0	1	-5	-3	2	-2	4	-4	-4	-5	-2	-3	-4
2	0.038677	0.051763	0.075138	0.105448	0.116333	0.144394	0.151192	0.140452	0.114857	0.098799	0.067354	0.049057	0.038454	0.030089	0.022377	0.016674	0.013721	0.011009	0.008676	0.008072	0.006297	2	2	-3	-3	-5	-1	1	1	-3	-2	-4	4	-2	-6	2	0	-2	-6	-5	-3	-1	0	-3	2	-5	2	5	0
2	0.008072	0.006297	0.005398	0.004636	0.004272	0.005829	0.011370	0.021299	0.032173	0.049884	0.080827	0.114574	0.160982	0.195043	0.211830	0.207954	0.189997	0.150633	0.111804	0.081903	0.056576	-4	-3	-3	-1	-7	-1	8	-5	-3	-6	-6	-2	-5	-6	-4	-3	-4	-6	-5	-5	-1	-5	-4	-5	-3	-4	-4	-5
2	0.160982	0.195043	0.211830	0.207954	0.189997	0.150633	0.111804	0.081903	0.056576	0.038046	0.023400	0.020318	0.021104	0.022444	0.026751	0.030093	0.034902	0.042006	0.048190	0.052730	0.056179	-1	-2	-1	4	4	0	0	-4	1	-1	-2	-1	-1	-1	-4	-2	-3	-1	5	-1	1	-2	-3	-3	0	-2	-2	-4
2	0.023400	0.020318	0.021104	0.022444	0.026751	0.030093	0.034902	0.042006	0.048190	0.052730	0.056179	0.058156	0.068602	0.069584	0.063644	0.059791	0.052310	0.031356	0.020264	0.015342	0.011000	2	1	1	-2	-2	1	-1	-1	-1	-2	-2	4	-2	-2	-2	-1	-2	-1	0	0	-2	-1	-3	-3	1	-3	-3	-3
2	0.026751	0.030093	0.034902	0.042006	0.048190	0.052730	0.056179	0.058156	0.068602	0.069584	0.063644	0.059791	0.052310	0.031356	0.020264	0.015342	0.011000	0.008971	0.008472	0.009856	0.012108	1	-4	5	-3	3	-2	-3	-2	-4	-4	-5	-3	-4	-5	-4	5	0	-6	-5	-3	-4	-5	-5	-4	-6	-4	-4	-5
2	0.015145	0.014316	0.015941	0.020409	0.033632	0.062140	0.088370	0.121716	0.143258	0.161849	0.184149	0.214642	0.210112	0.208829	0.205225	0.182710	0.144341	0.131921	0.117355	0.103684	0.084827	-2	-4	-3	-4	-4	-3	-3	-3	-4	-4	-5	-3	-4	-5	-4	5	6	-6	-5	-4	-1	-5	-2	8	-6	-3	-1	-3
2	0.033632	0.062140	0.088370	0.121716	0.143258	0.161849	0.184149	0.214642	0.210112	0.208829	0.205225	0.182710	0.144341	0.131921	0.117355	0.103684	0.084827	0.073858	0.062837	0.060246	0.052600	0	-5	-4	-4	-1	-4	-4	-3	-5	-5	-5	-4	-5	-6	8	0	2	-6	-6	-3	-2	-4	-3	-5	3	-4	-4	-5
2	0.129142	0.103426	0.088750	0.071519	0.055930	0.042819	0.036763	0.030680	0.027394	0.023907	0.020659	0.020419	0.022028	0.022114	0.022495	0.022514	0.021239	0.024539	0.032595	0.041813	0.047834	-2	-2	-6	-5	-5	-4	1	-6	-5	1	4	-3	2	-1	3	-4	-4	-1	-2	0	0	-1	4	-1	2	2	3	-2
2	0.071519	0.055930	0.042819	0.036763	0.030680	0.027394	0.023907	0.020659	0.020419	0.022028	0.022114	0.022495	0.022514	0.021239	0.024539	0.032595	0.041813	0.047834	0.054170	0.052142	0.045255	-2	-5	-6	-7	-4	-5	-6	-6	-5	0	3	-6	3	7	-6	-5	-4	3	1	1	1	-5	-6	-6	1	-5	-5	-5
2	0.020419	0.022028	0.022114	0.022495	0.022514	0.021239	0.024539	0.032595	0.041813	0.047834	0.054170	0.052142	0.045255	0.035632	0.031703	0.023239	0.018240	0.014852	0.012729	0.010358	0.010626	3	-5	-4	-5	-1	-3	-4	-4	-1	-1	-5	-4	-3	-6	7	-3	-1	-6	-5	-1	7	-3	-3	-5	-2	-1	-4	-3
2	0.016199	0.019600	0.025495	0.032350	0.039313	0.060063	0.096376	0.134808	0.165470	0.178235	0.172766	0.154459	0.120864	0.104402	0.096705	0.094722	0.091822	0.093189	0.082760	0.074625	0.061465	-2	-4	2	8	-6	-2	-1	-4	-2	-6	-6	-3	-6	-6	-4	-2	-4	-7	-1	-6	-2	-4	-5	-4	-5	-4	-4	-4
2	0.009204	0.008878	0.008600	0.008182	0.006906	0.006387	0.006486	0.006943	0.012558	0.016208	0.021192	0.026010	0.037094	0.045218	0.055179	0.071355	0.085862	0.099407	0.112977	0.143059	0.186559	0	-5	-1	-4	0	-2	-5	7	-4	-6	-6	-4	-5	-5	-5	-3	-4	-5	-4	-5	0	2	-3	-3	-4	0	-2	-2
2	0.037094	0.045218	0.055179	0.071355	0.085862	0.099407	0.112977	0.143059	0.186559	0.244255	0.294315	0.313554	0.329367	0.336029	0.338882	0.358228	0.426529	0.489892	0.546779	0.623833	0.698070	1	-5	-6	-6	1	-4	-5	-6	-6	3	-1	-3	-1	-4	-5	-4	-2	-6	-4	6	1	-4	-5	-6	-1	-4	-5	-5
2	0.085862	0.099407	0.112977	0.143059	0.186559	0.244255	0.294315	0.313554	0.329367	0.336029	0.338882	0.358228	0.426529	0.489892	0.546779	0.623833	0.698070	0.750588	0.752572	0.776752	0	-2	-2	1	0	-4	-3	0	6	-3	-6	-6	-2	-5	-5	-5	-2	-4	-5	-4	-6	-1	1	0	0	-5	3	4	-1
2	0.314589	0.279039	0.238359	0.191629	0.134986	0.093770	0.053010	0.034820	0.027032	0.019911	0.015704	0.012824	0.011062	0.010965	0.010769	0.011409	0.012281	0.011099	0.009556	0.009759	0.012683	1	-1	-1	3	-4	0	3	2	-2	-3	-3	-1	-3	-4	0	1	0	-5	-4	-3	4	-4	-1	0	-2	-3	-2	5
2	0	0	0	0	0	0	0.126367	0.109327	0.100259	0.064610	0.053845	0.054696	0.058054	0.059920	0.070539	0.076910	0.076696	0.075223	0.072059	0.063777	0.061594	0	0	0	0	0	0	0	0	0	0	0	0	0	0	0	0	0	0	0	0	0	0	0	0	0	0	0	0
2	0.024961	0.038556	0.048385	0.056270	0.071002	0.087334	0.118599	0.148011	0.184686	0.248440	0.298871	0.296600	0.273312	0.238797	0.168769	0.107568	0.074729	0.060440	0.051138	0.040634	0.031087	-4	-5	-5	-6	-2	-5	-6	-6	-5	2	3	-5	5	6	-6	-5	-3	0	0	1	-1	5	3	2	-3	4	2	-3
2	0.184686	0.248440	0.298871	0.296600	0.273312	0.238797	0.168769	0.107568	0.074729	0.060440	0.051138	0.040634	0.031087	0.022262	0.015475	0.009957	0.006852	0.005002	0.004486	0.004224	0.004315	-1	1	-1	-1	-1	-1	1	-3	-1	-1	-2	-1	0	0	-1	0	2	6	0	2	2	-2	-1	-1	-1	-1	-2	-2
2	0.008519	0.007384	0.007091	0.007021	0.006868	0.008135	0.010956	0.015702	0.021878	0.028305	0.034401	0.041242	0.048351	0.051689	0.057876	0.067385	0.080778	0.119056	0.192199	0.287179	0.382939	-5	-3	-4	-6	-5	-4	-5	-3	-1	-1	-1	-5	-3	0	-6	-3	-4	11	4	-3	0	-5	-5	-5	1	-3	-5	0
2	0.007021	0.006868	0.008135	0.010956	0.015702	0.021878	0.028305	0.034401	0.041242	0.048351	0.051689	0.057876	0.067385	0.080778	0.119056	0.192199	0.287179	0.382939	0.489271	0.568039	0.591364	-1	-3	-4	-5	-5	-5	-5	6	-5	-1	-2	-4	0	0	-5	-2	-1	0	-1	1	1	-3	-3	-5	2	-3	-5	-2
2	0.028305	0.034401	0.041242	0.048351	0.051689	0.057876	0.067385	0.080778	0.119056	0.192199	0.287179	0.382939	0.489271	0.568039	0.591364	0.589680	0.577027	0.556338	0.557087	0.579256	0.589624	1	-2	-5	-5	2	-2	-5	0	-4	3	2	-2	1	2	-5	-1	-1	2	1	1	-1	4	-2	-2	-1	0	-2	-2
2	0.048351	0.051689	0.057876	0.067385	0.080778	0.119056	0.192199	0.287179	0.382939	0.489271	0.568039	0.591364	0.589680	0.577027	0.556338	0.557087	0.579256	0.589624	0.630228	0.587898	0.565146	0	-3	-4	-6	-1	-5	-5	-1	-3	4	3	-4	1	1	-6	-3	-2	1	-1	2	0	2	-1	-5	0	-1	-3	-1
2	0.051689	0.057876	0.067385	0.080778	0.119056	0.192199	0.287179	0.382939	0.489271	0.568039	0.591364	0.589680	0.577027	0.556338	0.557087	0.579256	0.589624	0.630228	0.587898	0.565146	0.512626	0	2	-1	-5	0	-1	-3	-1	-1	2	0	1	2	0	-5	-1	0	3	2	1	1	0	2	-2	0	1	-1	1
2	0.591364	0.589680	0.577027	0.556338	0.557087	0.579256	0.589624	0.630228	0.587898	0.565146	0.512626	0.470572	0.411890	0.367927	0.335277	0.320010	0.307763	0.322240	0.345055	0.358752	0.377494	-1	5	0	-1	-1	0	-1	-4	1	-3	-2	4	-2	-2	-3	1	-1	-3	-2	-3	-1	2	0	-1	-2	3	0	0
2	0.577027	0.556338	0.557087	0.579256	0.589624	0.630228	0.587898	0.565146	0.512626	0.470572	0.411890	0.367927	0.335277	0.320010	0.307763	0.322240	0.345055	0.358752	0.377494	0.402159	0.421111	3	0	-1	-2	0	-2	0	1	-2	-2	-2	0	-4	-3	0	3	0	-5	-4	-2	-3	2	-2	-1	-1	1	1	-3
2	0.367927	0.335277	0.320010	0.307763	0.322240	0.345055	0.358752	0.377494	0.402159	0.421111	0.426608	0.448052	0.463793	0.472344	0.493076	0.460844	0.421513	0.382292	0.329441	0.247842	0.199912	-1	-1	-4	-2	-1	0	-4	-3	-4	3	3	-3	1	3	-3	-2	-2	0	2	1	-1	1	2	1	-5	2	2	-1
2	0.335277	0.320010	0.307763	0.322240	0.345055	0.358752	0.377494	0.402159	0.421111	0.426608	0.448052	0.463793	0.472344	0.493076	0.460844	0.421513	0.382292	0.329441	0.247842	0.199912	0.165322	-1	1	2	1	-5	2	2	-1	1	-1	-2	1	-2	-2	-2	0	0	-1	1	-2	0	2	1	1	-1	1	2	-3
2	0.377494	0.402159	0.421111	0.426608	0.448052	0.463793	0.472344	0.493076	0.460844	0.421513	0.382292	0.329441	0.247842	0.199912	0.165322	0.129378	0.102858	0.090705	0.081973	0.064793	0.045007	-2	-1	0	-1	2	0	-1	-2	3	1	2	-1	4	-1	-1	-2	-1	1	0	-1	-1	2	2	-2	0	0	-1	2
2	0.165322	0.129378	0.102858	0.090705	0.081973	0.064793	0.045007	0.027857	0.015323	0.009522	0.009693	0.011130	0.016419	0.025086	0.040854	0.070008	0.092571	0.110122	0.128217	0.155976	0.201686	0	-3	-2	-3	-2	-4	-2	-3	-3	4	1	-3	-1	-1	-1	-2	0	-2	-2	3	1	0	1	0	-2	1	0	-1
2	0.011130	0.016419	0.025086	0.040854	0.070008	0.092571	0.110122	0.128217	0.155976	0.201686	0.257083	0.326920	0.377180	0.394531	0.356284	0.300892	0.229615	0.167649	0.112653	0.079139	0.061504	-2	-2	-1	-3	-3	-1	-3	-3	-1	-3	-4	-3	-2	-1	7	-1	-1	3	3	-4	-2	2	-3	-5	2	-2	-3	-4
2	0.092571	0.110122	0.128217	0.155976	0.201686	0.257083	0.326920	0.377180	0.394531	0.356284	0.300892	0.229615	0.167649	0.112653	0.079139	0.061504	0.045429	0.039979	0.037167	0.038094	0.035196	-2	-2	-1	-3	-2	-2	-1	-3	-2	-5	-5	-2	-5	-5	8	1	-2	-6	-4	-4	1	0	-2	1	-4	0	2	-3
2	0.155976	0.201686	0.257083	0.326920	0.377180	0.394531	0.356284	0.300892	0.229615	0.167649	0.112653	0.079139	0.061504	0.045429	0.039979	0.037167	0.038094	0.035196	0.036839	0.042283	0.047730	-1	-2	-2	0	-1	-3	-1	-3	4	1	2	-2	2	2	-2	-2	-2	0	3	-1	0	-2	-1	0	-1	-2	0	-1
2	0.079139	0.061504	0.045429	0.039979	0.037167	0.038094	0.035196	0.036839	0.042283	0.047730	0.049403	0.053984	0.050094	0.038849	0.029315	0.022832	0.014042	0.010129	0.008129	0.007047	0.005660	1	-3	-1	-2	-1	-1	0	-3	3	-1	1	-2	2	1	-2	-1	-2	3	4	-1	-1	-5	-6	-6	-2	-5	-5	-6
2	0.002391	0.002488	0.002553	0.002305	0.002129	0.002065	0.002615	0.003783	0.007239	0.012010	0.024447	0.037882	0.045257	0.046962	0.050055	0.047458	0.045688	0.046125	0.051531	0.054391	0.054783	-4	-4	0	-5	2	1	-4	-4	6	-2	1	-4	3	4	-5	-4	-3	-1	4	-3	-3	-5	-6	-6	-1	-5	-5	-5
2	0.002553	0.002305	0.002129	0.002065	0.002615	0.003783	0.007239	0.012010	0.024447	0.037882	0.045257	0.046962	0.050055	0.047458	0.045688	0.046125	0.051531	0.054391	0.054783	0.049881	0.051446	-3	-6	-6	-7	-1	-6	-6	-4	-1	-1	-1	-6	1	8	-4	-5	-5	6	4	-3	-4	-4	7	-2	0	-2	-3	-4
2	0.049881	0.051446	0.049623	0.050692	0.054744	0.069309	0.102336	0.150293	0.208051	0.263955	0.308860	0.327504	0.313680	0.278543	0.231533	0.186498	0.147814	0.123032	0.113809	0.112592	0.119383	3	-3	-3	-5	10	-5	-5	-4	-5	-3	-3	-5	-4	-5	-5	-1	-1	-5	-5	-2	-5	-4	-1	8	-6	-3	-1	-4
2	0.054744	0.069309	0.102336	0.150293	0.208051	0.263955	0.308860	0.327504	0.313680	0.278543	0.231533	0.186498	0.147814	0.123032	0.113809	0.112592	0.119383	0.129573	0.160625	0.192494	0.226102	3	-5	-5	-5	-1	-4	-4	-4	-5	0	0	-4	-1	-4	-4	-2	-1	-5	-2	6	0	-5	-4	-5	-1	-4	-5	-5
2	0.005930	0.004905	0.004167	0.004596	0.006138	0.008507	0.011937	0.019943	0.030251	0.039797	0.047788	0.052278	0.052126	0.044112	0.039324	0.036812	0.033866	0.028996	0.027733	0.022908	0.015700	-1	-5	-6	-6	3	-5	-6	-1	-6	3	4	-5	0	-1	-3	-2	-1	-5	-4	2	0	-6	-6	-6	1	-5	-6	-3
2	0.160625	0.192494	0.226102	0.251662	0.280756	0.312068	0.355687	0.398499	0.441420	0.472695	0.475743	0.464153	0.461663	0.451137	0.452870	0.452014	0.457805	0.470651	0.501841	0.537696	0.564094	0	1	3	1	-5	1	1	-1	0	-4	-3	3	-4	-5	-4	1	0	-5	-3	-4	0	-4	-1	-4	1	-1	-2	-3
2	0.475743	0.464153	0.461663	0.451137	0.452870	0.452014	0.457805	0.470651	0.501841	0.537696	0.564094	0.568683	0.567762	0.556915	0.530815	0.494332	0.477886	0.464112	0.453794	0.460401	0.486292	-1	1	1	-1	-2	1	0	-1	2	-2	-1	1	-3	-3	3	0	0	-1	-3	-1	1	-1	1	-2	0	0	-2	-2
2	0.464153	0.461663	0.451137	0.452870	0.452014	0.457805	0.470651	0.501841	0.537696	0.564094	0.568683	0.567762	0.556915	0.530815	0.494332	0.477886	0.464112	0.453794	0.460401	0.486292	0.516023	1	-1	1	-2	0	0	-2	-2	1	0	0	-1	-1	0	1	2	1	0	-1	0	1	-2	-1	-3	2	-2	-3	-1
2	0.452014	0.457805	0.470651	0.501841	0.537696	0.564094	0.568683	0.567762	0.556915	0.530815	0.494332	0.477886	0.464112	0.453794	0.460401	0.486292	0.516023	0.534542	0.551601	0.571932	0.566878	3	-3	2	-3	-1	-1	-4	-3	3	0	1	-4	0	0	-3	0	1	-5	-2	1	1	-2	2	-2	2	-1	-2	3
2	0.567762	0.556915	0.530815	0.494332	0.477886	0.464112	0.453794	0.460401	0.486292	0.516023	0.534542	0.551601	0.571932	0.566878	0.556375	0.524134	0.497821	0.462874	0.403666	0.321407	0.245207	-2	1	1	-1	-4	-1	-1	-2	1	-2	-1	2	-2	-2	-1	4	0	-2	-3	-4	1	-2	1	-1	-3	3	0	-2
2	0	0	0	0	0	0	0	0	0.709315	0.698903	0.633064	0.552591	0.450570	0.346502	0.239554	0.146576	0.087106	0.054944	0.032921	0.021708	0.015443	0	0	0	0	0	0	0	0	0	0	0	0	0	0	0	0	0	0	0	0	0	0	0	0	0	0	0	0
2	0.464112	0.453794	0.460401	0.486292	0.516023	0.534542	0.551601	0.571932	0.566878	0.556375	0.524134	0.497821	0.462874	0.403666	0.321407	0.245207	0.189450	0.160478	0.116552	0.149054	0.129223	-4	8	-4	-5	-6	-2	-3	-5	-3	-6	-5	-1	-4	-6	-5	-4	-4	-6	-5	-6	-2	-3	-3	-4	4	-3	-3	-4
2	0.453794	0.460401	0.486292	0.516023	0.534542	0.551601	0.571932	0.566878	0.556375	0.524134	0.497821	0.462874	0.403666	0.321407	0.245207	0.189450	0.160478	0.116552	0.149054	0.129223	0.122883	-2	-3	-3	-4	4	-3	-3	-4	-4	2	1	-3	3	2	2	1	1	-3	-2	1	0	2	0	1	-4	0	0	-2
2	0.516023	0.534542	0.551601	0.571932	0.566878	0.556375	0.524134	0.497821	0.462874	0.403666	0.321407	0.245207	0.189450	0.160478	0.116552	0.149054	0.129223	0.122883	0.115865	0.116391	0.109395	-1	-1	-1	-5	-4	0	-4	-5	-5	4	1	-1	5	0	-1	-1	-1	-5	-4	1	1	1	0	-2	-4	1	-2	-2
2	0.304231	0.346652	0.388731	0.422723	0.495831	0.542377	0.608649	0.658884	0.703650	0.744761	0.751899	0.762450	0.730538	0.723059	0.727323	0.700862	0.647976	0.616937	0.591397	0.558030	0.542853	1	-1	-1	0	1	1	-1	-2	-1	0	0	1	1	-1	-2	1	1	-5	1	0	3	-1	3	-4	-5	-2	0	2
2	0.346652	0.388731	0.422723	0.495831	0.542377	0.608649	0.658884	0.703650	0.744761	0.751899	0.762450	0.730538	0.723059	0.727323	0.700862	0.647976	0.616937	0.591397	0.558030	0.542853	0.526620	3	-1	3	-4	-5	-2	0	2	-1	-3	-2	-1	-4	-5	-2	0	0	-5	-2	-1	1	-2	0	0	-1	2	2	-3
2	0.730538	0.723059	0.727323	0.700862	0.647976	0.616937	0.591397	0.558030	0.542853	0.526620	0.529656	0.521147	0.494599	0.491920	0.463894	0.473638	0.478538	0.451105	0.448783	0.449401	0.420588	-1	0	1	0	-5	1	0	-1	2	0	-1	0	2	1	0	0	0	-5	1	0	0	0	1	0	-5	1	0	0
2	0.727323	0.700862	0.647976	0.616937	0.591397	0.558030	0.542853	0.526620	0.529656	0.521147	0.494599	0.491920	0.463894	0.473638	0.478538	0.451105	0.448783	0.449401	0.420588	0.410185	0.422770	-1	0	0	0	2	0	0	-1	2	0	-1	0	2	1	0	-1	0	4	1	-1	-1	0	1	0	-5	1	0	-1
2	0.451105	0.448783	0.449401	0.420588	0.410185	0.422770	0.441510	0.462697	0.486202	0.509753	0.539489	0.578389	0.613868	0.623588	0.611020	0.639932	0.656069	0.680648	0.723228	0.730677	0.709671	-1	0	1	0	-5	1	0	-1	2	0	-1	0	2	1	-5	0	0	-4	1	0	0	1	1	1	-4	1	0	-4
2	0.047788	0.052278	0.052126	0.044112	0.039324	0.036812	0.033866	0.028996	0.027733	0.022908	0.015700	0.011090	0.007787	0.005498	0.003855	0.003297	0.003069	0.003818	0.005589	0.007864	0.011248	-1	3	0	-3	-2	1	0	-2	0	-2	-1	4	-2	-2	-2	1	-2	-1	1	-4	-2	4	2	-1	-6	0	0	-1
2	0.448783	0.449401	0.420588	0.410185	0.422770	0.441510	0.462697	0.486202	0.509753	0.539489	0.578389	0.613868	0.623588	0.611020	0.639932	0.656069	0.680648	0.723228	0.730677	0.709671	0.682191	0	1	1	1	-4	1	0	-4	3	0	-1	1	3	-4	1	0	0	-5	-4	-3	0	-3	-3	1	-4	-3	1	0
2	0.420588	0.410185	0.422770	0.441510	0.462697	0.486202	0.509753	0.539489	0.578389	0.613868	0.623588	0.611020	0.639932	0.656069	0.680648	0.723228	0.730677	0.709671	0.682191	0.651327	0.615910	0	1	1	1	3	1	0	0	-4	-4	-1	1	-3	-5	1	0	0	-5	-4	0	0	0	0	-4	-4	0	-4	-1
2	0.539489	0.578389	0.613868	0.623588	0.611020	0.639932	0.656069	0.680648	0.723228	0.730677	0.709671	0.682191	0.651327	0.615910	0.603645	0.663201	0.632080	0.578148	0.504159	0.432254	0.370839	0	1	1	0	-5	1	0	0	3	0	-1	0	2	-4	1	0	0	-5	2	-4	0	0	1	0	-4	1	2	-1
2	0.611020	0.639932	0.656069	0.680648	0.723228	0.730677	0.709671	0.682191	0.651327	0.615910	0.603645	0.663201	0.632080	0.578148	0.504159	0.432254	0.370839	0.318537	0.250608	0.182177	0.139470	-1	0	0	-4	3	1	0	-1	2	0	-1	0	2	1	0	-1	0	4	1	-1	-1	0	1	0	3	1	0	-5
2	0.344167	0.425409	0.497925	0.593795	0.644045	0.630516	0.598068	0.583001	0.553919	0.506101	0.495313	0.469099	0.436268	0.443836	0.455608	0.429658	0.435990	0.403303	0.348309	0.319623	0.302501	-3	-2	2	6	-5	-3	-1	0	-4	-3	-4	-2	-5	-5	1	1	-2	-6	-1	-5	1	-2	1	2	1	-1	5	-2
2	0.506101	0.495313	0.469099	0.436268	0.443836	0.455608	0.429658	0.435990	0.403303	0.348309	0.319623	0.302501	0.271048	0.247835	0.221653	0.172762	0.130305	0.090231	0.066691	0.042621	0.032367	-3	-1	-3	-1	-6	-1	-3	6	2	-6	-6	1	-1	-5	-1	-1	-4	-5	2	-6	0	-2	-1	-1	-5	2	2	-2
2	0.014464	0.014985	0.016749	0.020372	0.028977	0.052276	0.085540	0.117731	0.133080	0.142226	0.138162	0.132490	0.128607	0.137509	0.149296	0.177249	0.201706	0.235778	0.265885	0.305550	0.341040	0	-4	-4	-5	4	-4	-4	-5	-1	1	-2	-4	-3	2	-5	-4	-3	-2	7	2	-2	-4	-4	-4	-4	-4	-4	-4
2	0.133080	0.142226	0.138162	0.132490	0.128607	0.137509	0.149296	0.177249	0.201706	0.235778	0.265885	0.305550	0.341040	0.386688	0.453895	0.534245	0.600386	0.611830	0.601376	0.587831	0.525002	-1	-5	-6	-6	-4	-5	-5	-6	-6	5	3	-5	2	-3	-5	-4	-1	-5	-4	2	-3	-2	-3	0	-5	-4	-2	7
2	0.177249	0.201706	0.235778	0.265885	0.305550	0.341040	0.386688	0.453895	0.534245	0.600386	0.611830	0.601376	0.587831	0.525002	0.495143	0.478625	0.438656	0.390971	0.375354	0.335131	0.299158	1	2	1	1	-4	1	1	-2	2	-5	-5	3	-4	-5	-2	2	0	-5	-2	-4	-3	-4	-2	-4	-1	0	-1	-3
2	0.386688	0.453895	0.534245	0.600386	0.611830	0.601376	0.587831	0.525002	0.495143	0.478625	0.438656	0.390971	0.375354	0.335131	0.299158	0.276128	0.270583	0.252130	0.256091	0.282361	0.288818	0	0	3	2	2	1	0	2	3	-5	-2	1	-4	-5	-4	1	-3	-5	-4	-5	-4	-4	-4	-5	-4	-4	-4	-5
2	0.478625	0.438656	0.390971	0.375354	0.335131	0.299158	0.276128	0.270583	0.252130	0.256091	0.282361	0.288818	0.288449	0.299611	0.291338	0.265833	0.273074	0.277698	0.303687	0.327926	0.334763	-2	-1	-2	-1	-4	-4	-3	-4	-2	4	2	-3	1	1	-1	-1	-2	5	0	2	-2	-2	3	5	-5	1	-1	-3
2	0.288818	0.288449	0.299611	0.291338	0.265833	0.273074	0.277698	0.303687	0.327926	0.334763	0.367211	0.385986	0.414548	0.430439	0.439354	0.464859	0.477443	0.497256	0.537120	0.608846	0.652790	-1	-5	-6	-6	-4	-5	-6	-6	-6	7	0	-5	1	-3	-5	-5	-3	-5	-4	1	0	-3	-2	0	-3	-3	-3	-3
2	0.385986	0.414548	0.430439	0.439354	0.464859	0.477443	0.497256	0.537120	0.608846	0.652790	0.692893	0.734567	0.709289	0.610594	0.602479	0.595185	0.551562	0.556448	0.551573	0.511699	0.485915	-1	4	2	1	-6	0	-2	0	0	-6	-4	5	-4	-6	-4	-1	-3	-6	-5	-5	-3	-5	-6	-6	-4	-5	-6	-6
2	0.414548	0.430439	0.439354	0.464859	0.477443	0.497256	0.537120	0.608846	0.652790	0.692893	0.734567	0.709289	0.610594	0.602479	0.595185	0.551562	0.556448	0.551573	0.511699	0.485915	0.475576	-3	-5	-6	-6	-4	-5	-6	-6	-5	2	5	-5	5	3	-6	-5	-4	-4	-3	0	2	-1	-2	-2	-1	-1	-4	-4
2	0.439354	0.464859	0.477443	0.497256	0.537120	0.608846	0.652790	0.692893	0.734567	0.709289	0.610594	0.602479	0.595185	0.551562	0.556448	0.551573	0.511699	0.485915	0.475576	0.469204	0.439847	-1	2	3	1	-5	2	2	-1	2	-3	-1	0	-3	-2	-4	0	0	-5	-1	-3	-3	2	5	-1	-5	1	0	2
2	0.610594	0.602479	0.595185	0.551562	0.556448	0.551573	0.511699	0.485915	0.475576	0.469204	0.439847	0.437546	0.418297	0.379347	0.331910	0.288831	0.246325	0.203581	0.180737	0.168457	0.161562	-4	0	-4	-4	-5	5	-1	-5	-3	1	0	1	2	1	-5	-1	0	3	2	0	1	1	2	4	-5	2	1	-2
2	0.602479	0.595185	0.551562	0.556448	0.551573	0.511699	0.485915	0.475576	0.469204	0.439847	0.437546	0.418297	0.379347	0.331910	0.288831	0.246325	0.203581	0.180737	0.168457	0.161562	0.180455	1	1	2	4	-5	2	1	-2	1	-5	-3	1	-4	-2	-4	-1	1	-5	-4	-4	1	-4	-1	-2	-4	1	-1	-4
2	0.556448	0.551573	0.511699	0.485915	0.475576	0.469204	0.439847	0.437546	0.418297	0.379347	0.331910	0.288831	0.246325	0.203581	0.180737	0.168457	0.161562	0.180455	0.202169	0.234190	0.267420	0	1	-3	0	-5	0	1	-4	1	0	-2	4	1	0	-4	0	-3	2	1	-1	0	3	3	3	-5	1	1	-4
2	0.439847	0.437546	0.418297	0.379347	0.331910	0.288831	0.246325	0.203581	0.180737	0.168457	0.161562	0.180455	0.202169	0.234190	0.267420	0.281788	0.257430	0.229142	0.176731	0.120619	0.079574	0	-1	-1	2	-5	0	5	-1	-3	-5	-5	2	-2	-1	-2	0	0	0	-4	-4	1	2	-1	-1	-5	3	3	-3
2	0.168457	0.161562	0.180455	0.202169	0.234190	0.267420	0.281788	0.257430	0.229142	0.176731	0.120619	0.079574	0.053726	0.033384	0.022117	0.017317	0.015116	0.013111	0.012134	0.011028	0.008819	3	-3	2	-2	-3	-2	-3	5	-3	-4	-4	-2	-3	-4	-3	0	-1	-4	-1	-3	0	1	1	-2	-4	0	-1	-3
2	0.003818	0.005589	0.007864	0.011248	0.015442	0.022254	0.031787	0.046128	0.066211	0.092884	0.130384	0.195825	0.283095	0.368957	0.483193	0.573038	0.620624	0.652661	0.696076	0.715294	0.737344	0	-5	-3	-6	0	-5	-5	-3	-5	4	3	-5	-1	3	-5	-1	-1	-2	-3	2	3	5	-4	-5	3	-2	-4	-2
2	0.015116	0.013111	0.012134	0.011028	0.008819	0.008087	0.009644	0.012619	0.018060	0.028378	0.041849	0.057772	0.079115	0.091175	0.099008	0.120512	0.161972	0.225985	0.325196	0.462996	0.601092	-4	-5	-5	-6	-5	-5	-5	-6	-3	0	0	-5	0	7	-6	-5	-4	7	5	-3	-1	-4	-4	-4	-3	-4	-2	-3
2	0.057772	0.079115	0.091175	0.099008	0.120512	0.161972	0.225985	0.325196	0.462996	0.601092	0.714777	0.800873	0.867210	0.877895	0.865279	0.818132	0.740680	0.676239	0.616450	0.560584	0.534548	-4	-2	-5	-5	-2	-4	-4	-4	0	1	-1	-2	-3	1	-5	-3	0	7	7	1	0	-4	-5	-5	-1	-4	-5	-4
2	0.120512	0.161972	0.225985	0.325196	0.462996	0.601092	0.714777	0.800873	0.867210	0.877895	0.865279	0.818132	0.740680	0.676239	0.616450	0.560584	0.534548	0.527802	0.501378	0.484781	0.474312	-2	0	-2	-4	1	-3	-4	-5	1	0	3	-2	1	0	-4	-1	4	-4	-2	1	-1	2	6	-2	-3	-2	-2	-4
2	0.867210	0.877895	0.865279	0.818132	0.740680	0.676239	0.616450	0.560584	0.534548	0.527802	0.501378	0.484781	0.474312	0.480299	0.524226	0.579589	0.644768	0.729696	0.816059	0.851590	0.851870	0	0	2	3	-4	1	1	-1	1	-4	-4	-1	-2	-3	-1	3	1	-5	-4	-2	0	0	-1	2	-5	-3	-1	4
2	0.818132	0.740680	0.676239	0.616450	0.560584	0.534548	0.527802	0.501378	0.484781	0.474312	0.480299	0.524226	0.579589	0.644768	0.729696	0.816059	0.851590	0.851870	0.834639	0	0	1	0	1	-4	-3	-1	-2	-2	-1	-2	1	4	-1	1	-1	1	-1	-5	-1	-2	5	5	-4	-4	-4	-1	-3	0
2	0.022254	0.031787	0.046128	0.066211	0.092884	0.130384	0.195825	0.283095	0.368957	0.483193	0.573038	0.620624	0.652661	0.696076	0.715294	0.737344	0.756019	0.768670	0.752268	0.751250	0.768107	-2	-4	-3	-5	0	-4	-4	-3	-5	-3	-1	-3	-1	-3	8	-3	-3	-6	-3	-2	-1	-5	-3	-5	-1	-4	-4	-4
2	0.715294	0.737344	0.756019	0.768670	0.752268	0.751250	0.768107	0.743024	0.733510	0.747757	0.765370	0.773490	0.779710	0.792902	0.775537	0.770696	0.765356	0.764383	0.747840	0.750783	0.724487	1	-1	0	-3	-4	1	-2	-2	-4	2	0	-2	1	0	0	-1	0	2	1	3	-1	-1	2	0	-5	2	1	-1
2	0.779710	0.792902	0.775537	0.770696	0.765356	0.764383	0.747840	0.750783	0.724487	0.719298	0.707376	0.687758	0.669514	0.649167	0.632384	0.622949	0.610031	0.598525	0.582007	0.560447	0.559239	0	-1	2	-1	-5	0	1	-1	3	-1	-1	1	2	0	1	0	-1	0	1	-1	0	-2	0	2	-5	1	1	-2
2	0.687758	0.669514	0.649167	0.632384	0.622949	0.610031	0.598525	0.582007	0.560447	0.559239	0.529383	0.480475	0.427511	0.359268	0.300875	0.235800	0.183476	0.129990	0.081460	0.043076	0.029428	-1	-1	1	-1	-5	0	0	0	0	0	-2	-1	-1	-2	4	1	0	3	-1	0	-1	-1	0	-1	-5	-1	1	-1
2	0.271936	0.227070	0.207987	0.188769	0.198034	0.223531	0.238071	0.228596	0.226039	0.197734	0.156158	0.125801	0.104251	0.074106	0.061103	0.054582	0.059252	0.070014	0.086133	0.096059	0.103339	1	0	-1	3	-5	0	3	-1	1	-4	-2	0	-4	-5	3	-1	-2	-5	-2	-2	1	-1	1	2	-4	-1	1	3
2	0.125801	0.104251	0.074106	0.061103	0.054582	0.059252	0.070014	0.086133	0.096059	0.103339	0.107076	0.125312	0.141335	0.189553	0.259645	0.327463	0.380688	0.427007	0.465465	0.460369	0.441630	0	-2	-1	-1	-1	-2	0	-2	-2	-1	-1	-1	2	-2	-3	-1	5	-4	-1	1	-1	5	2	1	-5	-1	2	-1
2	0.259645	0.327463	0.380688	0.427007	0.465465	0.460369	0.441630	0.409235	0.381586	0.340157	0.317509	0.297640	0.280812	0.264786	0.251019	0.239134	0.234052	0.230479	0.235795	0.238236	0.244908	-1	1	-1	-2	1	0	-4	-3	-1	2	1	0	-1	1	-2	0	1	-5	-1	2	2	0	-1	-2	-5	-2	1	2
2	0.409235	0.381586	0.340157	0.317509	0.297640	0.280812	0.264786	0.251019	0.239134	0.234052	0.230479	0.235795	0.238236	0.244908	0.234511	0.224943	0.204599	0.168767	0.127646	0.110449	0.100523	-3	-2	3	6	-5	-2	2	-3	-2	-3	-2	-2	-3	-3	0	1	-1	-5	-1	-3	-2	-4	-3	-3	-1	-4	-2	-2
2	0.381586	0.340157	0.317509	0.297640	0.280812	0.264786	0.251019	0.239134	0.234052	0.230479	0.235795	0.238236	0.244908	0.234511	0.224943	0.204599	0.168767	0.127646	0.110449	0.100523	0.093378	-2	-4	-3	-3	-1	-4	-2	-2	-4	2	2	-3	6	1	3	-2	-1	1	-1	-1	1	3	0	3	-5	0	1	-1
2	0.313333	0.323508	0.333276	0.312868	0.276938	0.254344	0.237039	0.228149	0.240750	0.277133	0.312064	0.354840	0.397006	0.431170	0.435818	0.437128	0.412376	0.360871	0.318488	0.284031	0.236847	-2	0	0	2	-5	1	2	0	1	-4	-2	0	-4	-1	-1	0	0	-4	2	0	-1	-2	4	1	-2	-1	-2	-1
2	0.222146	0.228962	0.218185	0.197762	0.192908	0.184733	0.170052	0.171087	0.181465	0.175876	0.160926	0.159566	0.144388	0.135466	0.136783	0.149403	0.175993	0.208474	0.244086	0.282994	0.340850	0	-3	0	0	2	-3	1	0	-1	-1	-2	0	-1	-4	3	2	0	-4	2	-1	2	-2	-3	-2	-4	-2	-2	-1
2	0.159566	0.144388	0.135466	0.136783	0.149403	0.175993	0.208474	0.244086	0.282994	0.340850	0.401941	0.444242	0.486409	0.513706	0.500817	0.449692	0.403339	0.347011	0.297763	0.249010	0.209480	-1	1	-1	-1	0	-3	-3	6	-2	-4	-4	-2	-4	-3	-3	0	-1	-4	-3	-3	-3	-1	0	6	-4	-1	2	-1
2	0.444242	0.486409	0.513706	0.500817	0.449692	0.403339	0.347011	0.297763	0.249010	0.209480	0.189025	0.167376	0.144455	0.125145	0.121346	0.114649	0.110785	0.102618	0.103932	0.112065	0.122767	1	-1	-2	-1	-5	-3	1	1	-1	-1	-2	1	-4	-5	4	0	0	-5	-2	-1	0	-2	4	-1	-4	-2	-1	2
2	0.513706	0.500817	0.449692	0.403339	0.347011	0.297763	0.249010	0.209480	0.189025	0.167376	0.144455	0.125145	0.121346	0.114649	0.110785	0.102618	0.103932	0.112065	0.122767	0.138865	0.174782	-1	3	1	-3	-4	-2	-2	2	2	0	-2	-1	0	-4	-1	0	2	-4	-1	0	-2	-2	-3	-4	0	-2	-1	-2
2	0.035678	0.029700	0.025677	0.023813	0.022316	0.020448	0.020440	0.022420	0.026863	0.028702	0.035642	0.040091	0.043564	0.048091	0.055829	0.066357	0.085779	0.114061	0.153026	0.194691	0.251917	-2	-5	-6	-5	0	-5	-3	-4	-4	4	0	-5	1	1	-1	-4	-3	-3	2	5	-1	-3	3	7	-4	-2	-1	-3
2	0.167376	0.144455	0.125145	0.121346	0.114649	0.110785	0.102618	0.103932	0.112065	0.122767	0.138865	0.174782	0.204279	0.245013	0.283318	0.336694	0.365698	0.403210	0.415369	0.421711	0.413350	-1	-5	-5	-4	-1	-3	-3	-3	-1	3	4	-5	0	-3	-3	-2	1	-5	-4	2	1	3	0	-3	-1	-1	-1	-4
2	0.025677	0.023813	0.022316	0.020448	0.020440	0.022420	0.026863	0.028702	0.035642	0.040091	0.043564	0.048091	0.055829	0.066357	0.085779	0.114061	0.153026	0.194691	0.251917	0.327380	0.385288	-1	-2	-3	2	-4	-3	0	4	-3	-5	-5	-2	-4	-4	5	-2	-1	-3	-3	-2	1	1	-2	-1	-4	1	2	-1
2	0.023813	0.022316	0.020448	0.020440	0.022420	0.026863	0.028702	0.035642	0.040091	0.043564	0.048091	0.055829	0.066357	0.085779	0.114061	0.153026	0.194691	0.251917	0.327380	0.385288	0.425355	1	1	-2	-1	-4	1	2	-1	-1	0	-4	0	-1	0	-3	2	2	-5	-1	-3	-2	2	1	-1	-5	2	0	-1
2	0.284952	0.240512	0.228179	0.224463	0.252344	0.255823	0.261345	0.272781	0.264464	0.244907	0.242691	0.236471	0.232582	0.232305	0.252202	0.289676	0.326397	0.358655	0.390528	0.418375	0.469407	1	-2	-2	-3	0	1	-2	-5	-4	1	-2	-2	1	-2	-1	-1	3	-5	-1	4	5	-4	-3	-1	-1	-4	-2	-3
2	0.608601	0.562435	0.506770	0.441928	0.387287	0.342910	0.301933	0.301218	0.307487	0.305670	0.286357	0.255791	0.208083	0.165859	0.134931	0.111385	0.092523	0.089133	0.095978	0.100575	0.095565	-1	-2	0	0	-4	-3	-1	2	-1	-2	-1	-1	-2	-4	6	-1	-1	-5	-2	-2	0	-4	-4	-3	0	0	-1	-5
2	0.134931	0.111385	0.092523	0.089133	0.095978	0.100575	0.095565	0.091830	0.085311	0.067766	0.051417	0.057583	0.062562	0.077718	0.111672	0.156708	0.178216	0.195201	0.194002	0.187536	0.169560	-1	-2	-4	-3	-1	-1	-1	-1	-2	0	3	-1	4	-2	-1	-2	-1	-4	-2	2	-1	-4	-1	0	-4	-4	-2	6
2	0.089133	0.095978	0.100575	0.095565	0.091830	0.085311	0.067766	0.051417	0.057583	0.062562	0.077718	0.111672	0.156708	0.178216	0.195201	0.194002	0.187536	0.169560	0.188350	0.241762	0.290501	-1	-2	0	3	-4	-1	0	-2	-4	-4	-4	-1	-4	-5	4	3	2	-5	-4	-2	-1	-2	-5	-3	-4	-4	-2	-5
2	0.111672	0.156708	0.178216	0.195201	0.194002	0.187536	0.169560	0.188350	0.241762	0.290501	0.330185	0.364415	0.361247	0.303082	0.243734	0.174688	0.110979	0.071855	0.051723	0.041137	0.033062	0	1	7	-2	-5	-1	-2	-1	1	-4	-4	0	-2	-5	-4	-1	0	-6	-2	-2	3	-4	-4	-4	-4	-4	-4	-2
2	0.188350	0.241762	0.290501	0.330185	0.364415	0.361247	0.303082	0.243734	0.174688	0.110979	0.071855	0.051723	0.041137	0.033062	0.033847	0.033941	0.030713	0.030579	0.032839	0.043403	0.065907	-3	1	-5	-5	-4	-3	-3	-6	0	2	5	-2	4	0	-5	-4	-4	-1	-2	-1	0	-1	-1	0	-4	1	2	-2
2	0.033847	0.033941	0.030713	0.030579	0.032839	0.043403	0.065907	0.103587	0.160171	0.238670	0.316726	0.385651	0.453433	0.488351	0.473115	0.436811	0.392843	0.321876	0.286055	0.233575	0.204201	-2	-5	-6	-6	-4	-5	-6	-6	-5	4	3	-5	0	5	-6	-5	-4	-4	-2	2	1	-4	-4	-4	2	-4	-4	-4
2	0.488351	0.473115	0.436811	0.392843	0.321876	0.286055	0.233575	0.204201	0.169448	0.145487	0.099523	0.079888	0.052900	0.030764	0.018803	0.014172	0.010631	0.007793	0.006171	0.005575	0.005409	-1	-2	0	-3	-4	-2	1	-3	0	1	-1	1	-1	-2	-1	0	4	-4	-1	2	-3	-3	-1	7	-5	-3	-1	-3
2	0.204201	0.169448	0.145487	0.099523	0.079888	0.052900	0.030764	0.018803	0.014172	0.010631	0.007793	0.006171	0.005575	0.005409	0.008778	0.013207	0.023368	0.051249	0.120757	0.147181	0.187987	-2	3	-4	-5	-4	-2	-3	-4	-4	0	3	-2	3	2	-2	-1	-2	-4	-3	3	-2	1	-1	-1	-4	1	1	-4
2	0.085779	0.114061	0.153026	0.194691	0.251917	0.327380	0.385288	0.425355	0.460270	0.455611	0.414457	0.353273	0.281256	0.211058	0.151953	0.099707	0.071451	0.055921	0.038961	0.028222	0.021478	4	0	-3	-2	-1	1	2	0	-3	-3	-3	2	-3	-4	-4	-1	-2	-3	-3	-3	-2	-4	-6	-6	-4	-4	-5	-6
2	0.018410	0.018705	0.019787	0.024578	0.033683	0.046849	0.074332	0.124189	0.229511	0.299991	0.362328	0.414994	0.441648	0.434168	0.474627	0.522646	0.573800	0.631841	0.658340	0.662419	0.652218	-2	-5	-6	-6	-1	-5	-6	0	-5	0	3	-5	1	6	-6	-5	-3	7	-1	-1	-4	-6	-6	-6	-1	-5	-6	-6
2	0.474627	0.522646	0.573800	0.631841	0.658340	0.662419	0.652218	0.599977	0.521925	0.415626	0.337230	0.262800	0.219326	0.200581	0.219587	0.225306	0.246541	0.254901	0.250940	0.253295	0.258608	-1	-1	-1	0	-4	-2	-2	1	2	0	-1	-2	-1	-1	0	0	1	3	5	-1	-1	-1	-1	-2	0	-2	-2	2
2	0.522646	0.573800	0.631841	0.658340	0.662419	0.652218	0.599977	0.521925	0.415626	0.337230	0.262800	0.219326	0.200581	0.219587	0.225306	0.246541	0.254901	0.250940	0.253295	0.258608	0.246912	-1	-1	-1	-2	0	-2	-2	2	3	1	-2	1	-2	3	-2	0	-2	1	3	-2	-1	-1	-1	4	-4	-2	3	0
2	0	0	0	0.357020	0.310330	0.265295	0.176684	0.116180	0.083583	0.062428	0.053660	0.051951	0.051240	0.045990	0.038266	0.035678	0.029700	0.025677	0.023813	0.022316	0.020448	0	0	0	0	0	0	0	0	0	0	0	0	0	0	0	0	0	0	0	0	0	0	0	0	0	0	0	0
2	0.177036	0.205141	0.205279	0.190259	0.185213	0.192951	0.201146	0.219468	0.240051	0.246913	0.233480	0.222587	0.228494	0.216491	0.207768	0.206833	0.197214	0.224313	0.252293	0.269196	0.310144	2	-2	2	-1	-5	-1	4	-3	2	-4	-3	-2	-5	-6	-5	2	2	-6	-3	-3	-3	-2	0	-2	-6	-2	-1	7
2	0.185213	0.192951	0.201146	0.219468	0.240051	0.246913	0.233480	0.222587	0.228494	0.216491	0.207768	0.206833	0.197214	0.224313	0.252293	0.269196	0.310144	0.323212	0.315456	0.315095	0.297035	-2	0	1	3	-5	-1	-1	-2	-1	-3	-4	2	-4	-5	-1	2	4	-6	-2	-3	-1	-3	1	4	-6	-1	2	-3
2	0.192951	0.201146	0.219468	0.240051	0.246913	0.233480	0.222587	0.228494	0.216491	0.207768	0.206833	0.197214	0.224313	0.252293	0.269196	0.310144	0.323212	0.315456	0.315095	0.297035	0.284798	-1	-3	1	4	-6	-1	2	-3	-4	-3	-2	0	-3	-4	5	-2	-2	-3	-4	-3	-1	-1	4	4	-6	1	3	-2
2	0.216491	0.207768	0.206833	0.197214	0.224313	0.252293	0.269196	0.310144	0.323212	0.315456	0.315095	0.297035	0.284798	0.271841	0.266384	0.229315	0.193274	0.147339	0.113202	0.066524	0.052156	-3	-3	-2	-5	-6	-3	-3	6	0	-6	-4	-1	-2	-5	-1	-2	-3	-1	1	-4	-1	-1	-2	-2	-5	0	0	-1
2	0.039939	0.044242	0.048358	0.051313	0.054809	0.057655	0.065307	0.076890	0.088492	0.103496	0.123650	0.139578	0.154991	0.175923	0.216781	0.266694	0.318798	0.423169	0.518793	0.595215	0.655286	5	-5	-3	-1	-3	-4	-4	3	-5	-3	-5	-4	-2	-4	-4	0	3	-1	-2	-2	0	4	0	-1	-5	2	1	-3
2	0.051313	0.054809	0.057655	0.065307	0.076890	0.088492	0.103496	0.123650	0.139578	0.154991	0.175923	0.216781	0.266694	0.318798	0.423169	0.518793	0.595215	0.655286	0.680844	0.644979	0.623712	-3	-5	-6	-6	-2	-5	-6	-6	-6	5	4	-5	4	-3	-6	-5	-2	-5	-4	3	-3	-4	-3	-1	-6	-5	-4	7
2	0.581643	0.526921	0.453889	0.388453	0.317316	0.268364	0.233099	0.222564	0.218016	0.235144	0.251473	0.272027	0.272501	0.258262	0.244224	0.223856	0.208597	0.221442	0.247876	0.297229	0.339961	0	-1	-2	0	-4	-3	-2	-1	-2	3	2	-2	1	-3	-2	-1	-1	-5	0	2	-1	-1	2	5	-5	-3	0	0
2	0.376366	0.412038	0.467481	0.474814	0.496388	0.514668	0.529577	0.555188	0.589178	0.625884	0.666037	0.684808	0.665816	0.653232	0.597657	0.561248	0.508421	0.461081	0.388433	0.329977	0.274769	1	2	0	-1	-1	0	0	-1	-1	-3	-4	3	-1	-2	-4	3	-1	-5	-1	-3	1	3	1	1	-5	0	-2	-2
2	0	0	0	0	0	0	0	0	0	0.455693	0.428095	0.383189	0.315718	0.270455	0.244243	0.214156	0.195189	0.172006	0.190248	0.172698	0.158528	0	0	0	0	0	0	0	0	0	0	0	0	0	0	0	0	0	0	0	0	0	0	0	0	0	0	0	0
2	0.589178	0.625884	0.666037	0.684808	0.665816	0.653232	0.597657	0.561248	0.508421	0.461081	0.388433	0.329977	0.274769	0.247150	0.229348	0.216576	0.192601	0.184515	0.176934	0.159240	0.149639	0	-3	1	0	-4	0	-1	0	2	0	-2	0	1	-4	5	0	-1	-5	-4	-1	0	1	-4	-4	4	-3	-3	-4
2	0.625884	0.666037	0.684808	0.665816	0.653232	0.597657	0.561248	0.508421	0.461081	0.388433	0.329977	0.274769	0.247150	0.229348	0.216576	0.192601	0.184515	0.176934	0.159240	0.149639	0.142108	0	1	-4	-4	4	-3	-3	-4	3	1	0	1	3	2	-4	-3	-3	-3	2	1	-1	1	0	0	-5	0	0	-2
2	0.597657	0.561248	0.508421	0.461081	0.388433	0.329977	0.274769	0.247150	0.229348	0.216576	0.192601	0.184515	0.176934	0.159240	0.149639	0.142108	0.142576	0.154846	0.173420	0.197470	0.201926	-1	-2	-4	-4	-1	4	-1	-5	-3	2	1	1	2	0	-4	-2	-2	2	3	1	0	3	0	3	-5	2	2	-2
2	0.274769	0.247150	0.229348	0.216576	0.192601	0.184515	0.176934	0.159240	0.149639	0.142108	0.142576	0.154846	0.173420	0.197470	0.201926	0.210911	0.207582	0.203102	0.187998	0.177271	0.157557	0	-2	2	-2	0	-4	-4	1	-1	3	0	-2	5	-4	-4	0	0	-5	-4	1	-3	-3	-5	-6	-4	-4	-5	-6
2	0.192601	0.184515	0.176934	0.159240	0.149639	0.142108	0.142576	0.154846	0.173420	0.197470	0.201926	0.210911	0.207582	0.203102	0.187998	0.177271	0.157557	0.132694	0.101278	0.073650	0.057841	0	0	0	2	-5	0	4	-1	-4	-5	-3	0	-2	-1	0	0	1	-1	-5	-1	1	0	-1	1	-5	3	3	-3
2	0.196451	0.183792	0.211073	0.235522	0.277998	0.326943	0.390240	0.448802	0.491357	0.569700	0.627112	0.667242	0.712813	0.754675	0.770325	0.767335	0.768139	0.715782	0.730487	0.738863	0.715719	1	-2	-5	-1	-4	-4	-4	-5	-5	2	4	-4	2	2	-5	-1	-3	-4	-3	1	1	-4	-5	-5	-4	-1	-4	-3
2	0.016821	0.015994	0.017243	0.018062	0.017749	0.017673	0.017742	0.018488	0.019395	0.025490	0.033574	0.043004	0.051936	0.065363	0.075818	0.095938	0.116940	0.151681	0.211629	0.319783	0.426121	-4	-5	-5	-3	-4	-5	-5	-5	-3	-1	0	-5	0	7	-5	-4	-4	7	4	-3	-1	-4	-4	-4	-3	-4	-2	-2
2	0.015994	0.017243	0.018062	0.017749	0.017673	0.017742	0.018488	0.019395	0.025490	0.033574	0.043004	0.051936	0.065363	0.075818	0.095938	0.116940	0.151681	0.211629	0.319783	0.426121	0.544510	-1	-4	-4	-4	-3	-4	-2	-2	-4	3	-1	-4	-2	-3	-4	-3	1	1	-3	6	-1	-4	-2	-3	-1	-3	-4	7
2	0.043004	0.051936	0.065363	0.075818	0.095938	0.116940	0.151681	0.211629	0.319783	0.426121	0.544510	0.659003	0.743460	0.782330	0.814847	0.802842	0.783180	0.713240	0.639860	0.535501	0.455320	-2	1	-2	-4	-4	0	-2	-3	-1	2	-1	1	-1	0	1	-1	1	4	2	2	-3	-4	-3	-5	-1	-4	-5	-5
2	0.211073	0.235522	0.277998	0.326943	0.390240	0.448802	0.491357	0.569700	0.627112	0.667242	0.712813	0.754675	0.770325	0.767335	0.768139	0.715782	0.730487	0.738863	0.715719	0.703247	0.697377	3	-4	-3	-4	1	1	-3	2	0	0	-1	-3	-3	2	-2	2	0	-4	-3	-1	-2	-4	0	-5	3	1	-4	-3
2	0.814847	0.802842	0.783180	0.713240	0.639860	0.535501	0.455320	0.392159	0.368150	0.379719	0.436562	0.479406	0.533602	0.586561	0.644565	0.669039	0.706846	0.732330	0.741661	0	0	1	-4	0	4	-4	-1	-2	1	1	-3	-3	-1	-2	-1	-1	2	2	-5	-2	-2	3	-3	-1	-2	-4	-4	-4	4
2	0	0	0	0	0	0	0	0	0.455693	0.428095	0.383189	0.315718	0.270455	0.244243	0.214156	0.195189	0.172006	0.190248	0.172698	0.158528	0.168690	0	0	0	0	0	0	0	0	0	0	0	0	0	0	0	0	0	0	0	0	0	0	0	0	0	0	0	0
2	0.768139	0.715782	0.730487	0.738863	0.715719	0.703247	0.697377	0.687214	0.623915	0.595043	0.532656	0.474751	0.414014	0.360556	0.300031	0.260119	0.219312	0.181337	0.146503	0.119501	0.091969	-2	-1	3	0	-3	-1	0	-1	1	-1	-3	-1	1	-4	0	3	1	-4	-1	-1	-1	-3	1	-2	-4	-2	-2	-4
2	0.738863	0.715719	0.703247	0.697377	0.687214	0.623915	0.595043	0.532656	0.474751	0.414014	0.360556	0.300031	0.260119	0.219312	0.181337	0.146503	0.119501	0.091969	0.077162	0.069804	0.066613	1	-2	0	-2	-4	1	-1	0	1	2	-1	1	-2	0	-1	-2	0	-1	-1	1	1	-3	1	0	-4	-1	0	0
2	0.146503	0.119501	0.091969	0.077162	0.069804	0.066613	0.073302	0.093323	0.123812	0.159606	0.189504	0.222486	0.234574	0.242060	0.256698	0.281650	0.314341	0.352786	0.385902	0.392588	0.387015	1	-1	0	4	-4	1	3	1	-1	-4	-3	0	-4	-1	-2	0	0	-4	-4	-4	3	0	-1	-3	0	-1	-1	-1
2	0.077162	0.069804	0.066613	0.073302	0.093323	0.123812	0.159606	0.189504	0.222486	0.234574	0.242060	0.256698	0.281650	0.314341	0.352786	0.385902	0.392588	0.387015	0.402174	0.382822	0.363741	2	-2	0	-1	-3	-2	-1	0	-3	0	-1	-2	0	-3	-1	-2	3	-4	-1	2	0	-2	2	1	-1	1	2	0
2	0.352786	0.385902	0.392588	0.387015	0.402174	0.382822	0.363741	0.361393	0.358072	0.319157	0.304163	0.273898	0.225674	0.169718	0.127290	0.098234	0.073834	0.059217	0.046562	0.031308	0.019695	0	0	-3	-2	-1	0	-1	-3	-3	3	0	-2	-1	0	0	-1	1	5	3	0	-2	0	-2	-2	-4	-1	-2	-5
2	0.015413	0.015115	0.017886	0.028024	0.041702	0.060329	0.102858	0.144139	0.177036	0.205141	0.205279	0.190259	0.185213	0.192951	0.201146	0.219468	0.240051	0.246913	0.233480	0.222587	0.228494	1	-5	-6	-6	-3	-4	-5	-4	-1	4	0	-5	1	2	3	-4	-3	-2	3	3	-2	-4	3	-2	-4	-3	-4	-5
2	0.195884	0.220063	0.259047	0.293254	0.326135	0.329474	0.311509	0.303049	0.289294	0.262107	0.258291	0.273703	0.291211	0.268037	0.252073	0.248803	0.235699	0.186161	0.169329	0.151354	0.121296	2	0	2	-2	-5	2	0	-2	-1	-2	-1	0	0	0	-4	2	1	-5	0	-1	0	-1	-3	-2	-1	-1	-2	-3
2	0.258291	0.273703	0.291211	0.268037	0.252073	0.248803	0.235699	0.186161	0.169329	0.151354	0.121296	0.090714	0.080119	0.065518	0.048475	0.041250	0.030407	0.023287	0.022390	0.025394	0.033731	1	3	0	-1	-3	0	-1	-2	1	-5	-3	2	-2	-5	2	0	3	-6	-5	-3	-2	-3	0	2	-2	-3	-3	-1
2	0.273703	0.291211	0.268037	0.252073	0.248803	0.235699	0.186161	0.169329	0.151354	0.121296	0.090714	0.080119	0.065518	0.048475	0.041250	0.030407	0.023287	0.022390	0.025394	0.033731	0.046155	-2	-3	0	2	-2	-3	-3	-1	-4	-5	-5	-3	-4	-5	-3	6	3	-6	-4	-5	0	0	-5	-5	-4	-2	-2	-4
2	0.008339	0.007282	0.007621	0.009452	0.012136	0.016028	0.019127	0.022445	0.024613	0.027740	0.026798	0.028102	0.034007	0.044644	0.072265	0.099973	0.146352	0.206143	0.289041	0.365164	0.420279	1	2	1	-2	-2	1	-2	-1	-3	2	-2	-1	-1	-1	-3	0	0	1	-1	2	-3	-5	-1	6	5	-4	-3	-2
2	0.024613	0.027740	0.026798	0.028102	0.034007	0.044644	0.072265	0.099973	0.146352	0.206143	0.289041	0.365164	0.420279	0.464513	0.497965	0.501255	0.479253	0.465116	0.428181	0.375924	0.316207	-4	-4	8	-2	-6	-3	-4	-4	-3	-6	-7	-3	-5	-6	-5	1	-2	-7	-5	-6	-1	0	-2	-1	-4	-1	-3	-1
2	0.028102	0.034007	0.044644	0.072265	0.099973	0.146352	0.206143	0.289041	0.365164	0.420279	0.464513	0.497965	0.501255	0.479253	0.465116	0.428181	0.375924	0.316207	0.262884	0.234706	0.212194	6	-5	-5	-5	-3	-4	-4	0	-5	-2	0	-4	1	-4	-4	-2	-2	-6	-5	-1	-1	-2	-6	-7	-5	-4	-6	-7
2	0.234706	0.212194	0.194509	0.183198	0.185570	0.181022	0.183993	0.195711	0.211732	0.224084	0.230499	0.240058	0.231472	0.228712	0.237055	0.256708	0.278088	0.317744	0.363057	0.397117	0.387123	-1	-1	-5	-5	-3	-1	0	-1	-2	2	3	-5	1	2	-4	-4	-3	-3	-3	3	-2	6	-3	-2	-1	0	-1	-4
2	0.506044	0.446885	0.415658	0.407555	0.419504	0.409444	0.400454	0.411546	0.454467	0.507639	0.565466	0.628410	0.669824	0.668917	0.675097	0.658105	0.643689	0.592424	0.506259	0.428577	0.332828	-2	-2	-2	-3	-3	-2	-2	0	-3	0	3	2	-1	-2	-3	1	3	-4	-3	-1	-1	-3	-3	-4	3	1	-3	0
2	0.181022	0.183993	0.195711	0.211732	0.224084	0.230499	0.240058	0.231472	0.228712	0.237055	0.256708	0.278088	0.317744	0.363057	0.397117	0.387123	0.381189	0.355404	0.326242	0.265427	0.225441	0	-2	-2	-3	-3	0	-4	4	2	-1	-1	-3	4	-1	-5	-1	0	2	-1	-2	-1	0	3	1	-6	1	3	1
2	0.230499	0.240058	0.231472	0.228712	0.237055	0.256708	0.278088	0.317744	0.363057	0.397117	0.387123	0.381189	0.355404	0.326242	0.265427	0.225441	0.192091	0.177230	0.141583	0.136562	0.127763	0	2	-1	0	-2	-1	-1	2	0	-1	-1	0	1	-3	0	-1	-1	3	-1	0	1	0	-4	-5	-3	-2	-4	-6
2	0.228712	0.237055	0.256708	0.278088	0.317744	0.363057	0.397117	0.387123	0.381189	0.355404	0.326242	0.265427	0.225441	0.192091	0.177230	0.141583	0.136562	0.127763	0.108544	0.080953	0.062976	1	-1	-1	2	-5	-1	3	-1	-2	-3	-1	-2	0	-2	4	-1	-3	-4	0	-1	2	1	1	1	-5	1	3	-1
2	0.415658	0.407555	0.419504	0.409444	0.400454	0.411546	0.454467	0.507639	0.565466	0.628410	0.669824	0.668917	0.675097	0.658105	0.643689	0.592424	0.506259	0.428577	0.332828	0.227613	0.155242	4	-3	4	-2	-3	1	-2	-2	-2	0	-1	-2	-2	-4	-3	2	-1	-4	-3	-2	4	-2	-3	-3	-3	-2	-2	-1
2	0.045819	0.056188	0.063827	0.066351	0.076051	0.079998	0.073317	0.078096	0.095555	0.099655	0.101812	0.112661	0.113039	0.100055	0.101738	0.114126	0.131873	0.147909	0.163938	0.172516	0.167153	-2	-5	-4	-5	-4	-4	-4	-3	-3	-3	-4	-4	-4	-5	-5	-2	7	-6	-5	1	2	-5	-3	-4	-2	-2	-3	3
2	0.066351	0.076051	0.079998	0.073317	0.078096	0.095555	0.099655	0.101812	0.112661	0.113039	0.100055	0.101738	0.114126	0.131873	0.147909	0.163938	0.172516	0.167153	0.159991	0.142358	0.123363	-1	-2	-1	-3	0	3	-3	1	7	1	-3	-3	1	-2	-5	-1	1	-6	-1	0	-3	-4	0	7	-7	-3	4	-4
2	0.114126	0.131873	0.147909	0.163938	0.172516	0.167153	0.159991	0.142358	0.123363	0.108313	0.092659	0.069623	0.058595	0.050544	0.037762	0.032663	0.029300	0.030623	0.040446	0.055187	0.076835	-3	-5	-5	-3	-5	-5	-4	-6	-3	2	3	-6	2	3	-5	-5	-4	5	6	-1	-1	3	-1	-1	-5	4	1	-4
2	0.037762	0.032663	0.029300	0.030623	0.040446	0.055187	0.076835	0.118260	0.181337	0.243357	0.302485	0.392626	0.459039	0.488550	0.506341	0.516995	0.486146	0.455330	0.425303	0.391614	0.349933	1	1	0	-3	-2	-1	-2	-3	2	0	-1	-3	-1	1	-4	0	-1	4	4	2	3	-4	-3	-5	0	-2	-2	1
2	0.181337	0.243357	0.302485	0.392626	0.459039	0.488550	0.506341	0.516995	0.486146	0.455330	0.425303	0.391614	0.349933	0.288941	0.222909	0.157457	0.097486	0.050805	0.024822	0.012769	0.010038	1	-2	-2	-2	-3	-2	-1	-1	-4	1	3	-1	1	0	0	-1	-1	2	-1	1	0	0	1	4	-5	1	3	-1
2	0.454467	0.507639	0.565466	0.628410	0.669824	0.668917	0.675097	0.658105	0.643689	0.592424	0.506259	0.428577	0.332828	0.227613	0.155242	0.113378	0.071095	0.040863	0.023167	0.011564	0.007257	0	-2	-2	-5	-4	-4	-4	-3	-3	0	2	-4	4	6	-5	-2	-3	-2	2	-2	2	-4	-4	-4	0	-2	-4	-2
2	0.261247	0.300876	0.317460	0.316241	0.306513	0.298369	0.279986	0.262353	0.249720	0.250487	0.243070	0.197237	0.159523	0.124078	0.086684	0.049144	0.040294	0.038623	0.039225	0.040212	0.038432	-1	0	-2	0	-2	-1	0	0	1	-4	-2	0	-3	-5	6	0	-1	-1	-3	-3	-1	-3	0	3	-1	0	2	3
2	0.197237	0.159523	0.124078	0.086684	0.049144	0.040294	0.038623	0.039225	0.040212	0.038432	0.033309	0.023652	0.017458	0.010943	0.007094	0.005441	0.004872	0.004882	0.005388	0.007268	0.009555	1	-3	-2	3	-6	1	6	-2	-2	-5	-6	0	-5	-6	-2	-1	-2	-6	-4	-5	0	0	-2	2	-6	4	4	-4
2	0.007094	0.005441	0.004872	0.004882	0.005388	0.007268	0.009555	0.010890	0.011495	0.012192	0.011184	0.009873	0.009854	0.010218	0.012112	0.019243	0.027155	0.033701	0.041734	0.046507	0.042998	-3	-3	-6	-7	-5	-4	-5	-5	0	1	2	-5	3	4	-6	-5	-4	8	4	0	-3	0	-1	0	-6	7	-2	-2
2	0.658105	0.643689	0.592424	0.506259	0.428577	0.332828	0.227613	0.155242	0.113378	0.071095	0.040863	0.023167	0.011564	0.007257	0.006655	0.007739	0.009746	0.013623	0.018986	0.027284	0.034939	2	-4	-3	-3	0	-2	-2	-4	0	1	1	-4	6	2	-1	-1	1	-4	-2	-1	2	-4	2	-1	-4	1	-2	3
2	0.033137	0.031764	0.036200	0.043685	0.052485	0.065391	0.074377	0.069977	0.061604	0.048975	0.035075	0.021085	0.019692	0.018846	0.016715	0.014693	0.015718	0.012875	0.011918	0.011717	0.010035	-2	-4	-2	-6	-3	-5	-4	-5	2	3	3	-5	4	2	-6	-4	2	-2	1	2	0	-5	-6	-5	-2	-4	-5	-4
2	0.043685	0.052485	0.065391	0.074377	0.069977	0.061604	0.048975	0.035075	0.021085	0.019692	0.018846	0.016715	0.014693	0.015718	0.012875	0.011918	0.011717	0.010035	0.007842	0.007992	0.008830	0	0	-2	3	-6	-1	2	-3	-3	-5	-3	0	-2	-5	6	-2	-2	-3	-5	-4	2	1	-2	4	-5	0	4	-1
2	0.013124	0.016828	0.019868	0.034653	0.049683	0.060681	0.064335	0.064609	0.054325	0.039510	0.026614	0.020479	0.017160	0.015213	0.019757	0.022594	0.023347	0.025565	0.026669	0.028051	0.032163	2	0	-4	-2	-4	-4	-4	-3	-2	1	0	-3	3	3	-4	-2	-1	0	4	1	2	0	-2	2	-5	-1	2	-2
2	0.064335	0.064609	0.054325	0.039510	0.026614	0.020479	0.017160	0.015213	0.019757	0.022594	0.023347	0.025565	0.026669	0.028051	0.032163	0.042063	0.044296	0.047226	0.053546	0.061783	0.062463	2	-3	-2	0	-5	0	3	-2	1	-4	-3	1	-3	-3	5	-1	-1	-4	-3	-2	0	0	-1	3	-6	1	5	-1
2	0.015213	0.019757	0.022594	0.023347	0.025565	0.026669	0.028051	0.032163	0.042063	0.044296	0.047226	0.053546	0.061783	0.062463	0.073543	0.077576	0.073687	0.077527	0.091694	0.093952	0.093112	-2	-3	1	-2	-4	-2	-3	-5	-1	-3	-4	-3	0	3	2	0	-3	4	7	-1	3	2	-2	-3	-3	-3	-4	-4
2	0.053271	0.059576	0.058399	0.054427	0.059628	0.071180	0.093469	0.142121	0.177532	0.189506	0.185678	0.155991	0.097611	0.056201	0.030290	0.015112	0.009117	0.006470	0.005287	0.004657	0.004035	7	-4	-5	-5	-4	-4	-4	-3	-2	-4	-5	-4	-4	-4	-4	-1	-1	3	-4	-3	-2	2	-4	-4	-5	-1	-3	-4
2	0.005287	0.004657	0.004035	0.004387	0.005840	0.011005	0.023318	0.049195	0.110434	0.233912	0.400129	0.482613	0.596753	0	0	0	0	0	0	0	0	-4	-5	1	8	-7	-3	-1	-5	-2	-6	-7	-4	-6	-7	-5	-2	-2	-8	-6	-6	-4	-6	-6	-7	-5	-6	-6	-7
2	0.007739	0.009746	0.013623	0.018986	0.027284	0.034939	0.039607	0.040557	0.040957	0.041563	0.040044	0.036910	0.034930	0.029656	0.020898	0.013387	0.009321	0.005914	0.004947	0.003967	0.004865	3	-3	-3	-2	-4	-4	-5	6	-5	-5	-5	-3	-5	-6	-5	-2	-4	-6	-6	-4	-2	4	1	1	-4	0	-1	-3
2	0.009746	0.013623	0.018986	0.027284	0.034939	0.039607	0.040557	0.040957	0.041563	0.040044	0.036910	0.034930	0.029656	0.020898	0.013387	0.009321	0.005914	0.004947	0.003967	0.004865	0.006567	-2	4	1	1	-4	0	-1	-3	1	-3	-3	3	-4	-5	0	-1	2	-4	-2	-1	-3	-6	-6	-6	-3	-6	-6	-4
2	0.279683	0.247916	0.217164	0.195402	0.192669	0.190687	0.177019	0.148708	0.114135	0.081338	0.053188	0.026139	0.016595	0.011894	0.011555	0.010816	0.010962	0.012006	0.013599	0.016544	0.016069	1	2	0	1	-2	1	0	0	-2	-1	-3	2	-1	-3	0	0	-2	-4	-3	0	-1	-1	0	-1	-3	-1	-2	4
2	0.217164	0.195402	0.192669	0.190687	0.177019	0.148708	0.114135	0.081338	0.053188	0.026139	0.016595	0.011894	0.011555	0.010816	0.010962	0.012006	0.013599	0.016544	0.016069	0.017251	0.022154	2	0	-1	1	-5	-1	0	-2	-2	-3	-4	0	-4	-4	5	1	0	-5	-3	-2	1	-1	2	4	-3	0	0	2
2	0.142382	0.136351	0.168356	0.204572	0.221353	0.237507	0.243309	0.221924	0.199712	0.208641	0.225155	0.250445	0.267854	0.274975	0.255984	0.224878	0.176881	0.134304	0.100957	0.083565	0.072025	4	-3	-3	0	2	0	-1	1	-3	0	-3	-3	-3	-4	3	0	-2	-4	-4	-3	1	-2	-2	2	-3	2	2	1
2	0.225155	0.250445	0.267854	0.274975	0.255984	0.224878	0.176881	0.134304	0.100957	0.083565	0.072025	0.071665	0.091502	0.100673	0.105438	0.105434	0.101761	0.088769	0.085224	0.092922	0.111879	-1	0	-2	2	0	0	1	1	2	-3	-2	0	-1	-3	4	0	-1	-5	-4	-2	0	-2	-4	-3	-4	-1	-3	1
2	0.547737	0.491365	0.430591	0.352150	0.275116	0.206046	0.158300	0.115808	0.095174	0.090392	0.097348	0.109778	0.125502	0.127187	0.120835	0.118643	0.120354	0.106149	0.094859	0.083049	0.069795	-2	1	1	-1	-5	-1	0	-1	2	-1	-1	1	1	-1	3	-1	-1	2	2	-2	-1	-3	0	1	-3	-2	-2	-2
2	0.095174	0.090392	0.097348	0.109778	0.125502	0.127187	0.120835	0.118643	0.120354	0.106149	0.094859	0.083049	0.069795	0.047896	0.043324	0.040628	0.039988	0.039195	0.041826	0.051893	0.065811	2	0	0	-4	1	-2	-2	-1	2	0	1	-3	6	-3	-4	-1	0	-1	-2	-1	-2	-5	-5	-6	-4	-5	-5	-6
2	0.025548	0.028485	0.032183	0.039164	0.052483	0.062246	0.083507	0.114458	0.141187	0.169282	0.207127	0.250722	0.276363	0.311862	0.313848	0.299361	0.259704	0.238450	0.210865	0.187916	0.192048	-1	-2	-3	-4	-2	-3	-2	-3	2	1	3	-2	2	4	1	0	-2	-3	-2	-1	-1	2	2	3	-4	-2	1	-2
2	0.181136	0.202576	0.215954	0.212859	0.201688	0.189317	0.176892	0.163341	0.167882	0.192095	0.226469	0.247592	0.299923	0.332302	0.326976	0.311574	0.310934	0.284903	0.271339	0.284215	0.326534	-3	3	2	0	1	2	0	0	2	-3	-3	2	-4	-2	-2	-2	-3	-1	2	-2	-1	-3	3	2	0	4	0	-1
2	0.189317	0.176892	0.163341	0.167882	0.192095	0.226469	0.247592	0.299923	0.332302	0.326976	0.311574	0.310934	0.284903	0.271339	0.284215	0.326534	0.362956	0.387702	0.379729	0.344617	0.293211	0	2	1	-1	4	-2	-2	-1	0	-1	1	-2	0	1	-1	1	-2	0	-1	-1	-2	-2	1	0	2	-4	-3	-5
2	0	0	0.788123	0.735028	0.726355	0.712989	0.699202	0.683396	0.660099	0.613190	0.554227	0.495874	0.454799	0.383415	0.381568	0.314934	0.301081	0.298055	0.303002	0.318457	0.337097	0	0	0	0	0	0	0	0	0	0	0	0	0	0	0	0	0	0	0	0	0	0	0	0	0	0	0	0
2	0.186211	0.162174	0.134898	0.096939	0.076349	0.068633	0.073493	0.093665	0.152562	0.225065	0.286243	0.340190	0.385137	0.374375	0.348269	0.323455	0.292188	0.251698	0.234633	0.202784	0.175344	0	0	-2	2	-6	4	5	-2	-3	-4	-4	1	-4	-3	-1	-3	-3	-6	-3	-4	-4	-5	-6	-6	-4	-3	-2	-6
2	0.225065	0.286243	0.340190	0.385137	0.374375	0.348269	0.323455	0.292188	0.251698	0.234633	0.202784	0.175344	0.140634	0.121610	0.102862	0.104959	0.110883	0.127259	0.137673	0.150239	0.149843	-2	-2	-5	-5	0	-4	-5	-5	-5	6	2	-1	0	-1	-5	-4	-3	0	-4	4	-3	0	0	-2	-1	-2	2	-1
2	0.683728	0.634142	0.629962	0.602751	0.569465	0.540458	0.521054	0.469983	0.419808	0.377860	0.319396	0.252334	0.203183	0.150598	0.103275	0.076085	0.052894	0.047255	0.045608	0.048340	0.050131	-2	-4	-2	-4	-3	1	-4	-5	-4	5	0	-2	-1	-3	3	-3	0	-5	-4	3	-3	4	0	-4	-4	2	-2	-4
2	0.104959	0.110883	0.127259	0.137673	0.150239	0.149843	0.149586	0.157402	0.177865	0.185496	0.193097	0.190854	0.197837	0.175311	0.149576	0.123438	0.102150	0.069799	0.059371	0.072122	0.083228	0	0	-3	-3	-4	-2	2	4	-3	-5	-4	5	-4	-5	-3	-3	-3	-4	-4	-4	0	-4	-4	-3	5	-3	4	-3
2	0.150239	0.149843	0.149586	0.157402	0.177865	0.185496	0.193097	0.190854	0.197837	0.175311	0.149576	0.123438	0.102150	0.069799	0.059371	0.072122	0.083228	0.093189	0.101545	0.105829	0.098297	-1	-2	0	3	3	-3	-1	2	-1	-3	-3	-4	-4	-4	-4	3	0	1	0	0	-1	-1	-2	0	-2	-2	1	-2
2	0.149576	0.123438	0.102150	0.069799	0.059371	0.072122	0.083228	0.093189	0.101545	0.105829	0.098297	0.093044	0.087377	0.078514	0.076495	0.089965	0.117690	0.168689	0.213981	0.270616	0.314606	-1	3	0	-1	-5	-2	1	-4	1	-2	-3	5	-1	-5	-4	-2	-1	3	-4	-1	1	0	-4	-4	0	-4	-4	-4
2	0.069799	0.059371	0.072122	0.083228	0.093189	0.101545	0.105829	0.098297	0.093044	0.087377	0.078514	0.076495	0.089965	0.117690	0.168689	0.213981	0.270616	0.314606	0.382299	0.451867	0.524240	-1	6	-3	0	-2	2	1	-4	1	-2	-2	1	-3	-2	-4	-2	-2	-5	-2	-3	5	-2	-4	-3	-1	-1	-2	-1
2	0.348724	0.291781	0.239846	0.198180	0.182089	0.148122	0.114679	0.097727	0.091625	0.089307	0.091480	0.093783	0.090943	0.089990	0.095173	0.098342	0.106911	0.127645	0.163130	0.195578	0.217391	-3	-1	-5	-6	-4	-4	-3	-4	0	4	2	-5	0	2	-2	-4	-1	0	1	3	-1	-5	-6	-6	3	-5	-5	-6
2	0.106911	0.127645	0.163130	0.195578	0.217391	0.237143	0.265843	0.268990	0.264924	0.243802	0.212353	0.174524	0.135076	0.102086	0.096744	0.100811	0.096485	0.099455	0.103962	0.110957	0.119503	1	-4	-2	-4	6	-1	-4	-4	-4	0	3	-4	4	-3	-4	0	0	-4	-3	1	-3	-3	3	6	-1	1	0	0
2	0.127645	0.163130	0.195578	0.217391	0.237143	0.265843	0.268990	0.264924	0.243802	0.212353	0.174524	0.135076	0.102086	0.096744	0.100811	0.096485	0.099455	0.103962	0.110957	0.119503	0.128402	-3	-3	3	6	-1	1	0	0	-3	-4	-4	-3	-4	3	-4	-2	-3	-4	-1	-4	-1	3	-1	1	-2	-2	2	-1
2	0.237143	0.265843	0.268990	0.264924	0.243802	0.212353	0.174524	0.135076	0.102086	0.096744	0.100811	0.096485	0.099455	0.103962	0.110957	0.119503	0.128402	0.128948	0.132636	0.138651	0.155057	-2	-2	3	6	-4	0	0	-2	-3	-4	-3	-1	-4	-4	-2	1	-1	-4	-4	-3	0	-2	-3	-1	-3	-3	1	-3
2	0.138651	0.155057	0.180560	0.217855	0.263234	0.293141	0.307838	0.338265	0.366688	0.388771	0.387590	0.384579	0.339850	0.285273	0.232329	0.203471	0.173845	0.153804	0.151248	0.149538	0.131382	-2	-3	-3	-3	0	-3	-3	-3	-1	3	0	-3	0	5	1	-2	-2	1	1	1	0	-3	-1	0	-3	-2	-2	5
2	0.387590	0.384579	0.339850	0.285273	0.232329	0.203471	0.173845	0.153804	0.151248	0.149538	0.131382	0.123476	0.131662	0.123553	0.130081	0.130517	0.130027	0.119280	0.121420	0.105019	0.093409	0	1	1	0	-4	3	3	-3	-1	-1	-2	3	-2	-4	-4	-1	1	-1	-2	-2	-3	6	0	-2	-5	-1	0	-4
2	0.173845	0.153804	0.151248	0.149538	0.131382	0.123476	0.131662	0.123553	0.130081	0.130517	0.130027	0.119280	0.121420	0.105019	0.093409	0.081064	0.074990	0.077036	0.110810	0.163436	0.232745	2	1	-3	-4	0	-1	-1	-2	-2	1	1	2	0	-3	-4	-2	-2	-4	-2	3	1	2	-1	1	-5	0	3	-2
2	0.077036	0.110810	0.163436	0.232745	0.304669	0.392452	0.444741	0.517856	0.588487	0.674421	0.701162	0.739352	0.759538	0.785037	0.756517	0.696400	0.585514	0.470294	0.357345	0.253492	0.176219	3	-2	-2	-2	0	-2	-2	-2	-2	3	-1	-1	-2	0	-1	0	0	2	-1	2	-1	-2	3	0	2	-2	-2	0
2	0.304669	0.392452	0.444741	0.517856	0.588487	0.674421	0.701162	0.739352	0.759538	0.785037	0.756517	0.696400	0.585514	0.470294	0.357345	0.253492	0.176219	0.134156	0.101636	0.072383	0.054415	3	-2	-2	-1	-1	0	-2	-1	0	2	1	-2	0	1	-2	0	-1	-2	-2	-1	0	-1	-1	4	-3	-1	-2	1
2	0.444741	0.517856	0.588487	0.674421	0.701162	0.739352	0.759538	0.785037	0.756517	0.696400	0.585514	0.470294	0.357345	0.253492	0.176219	0.134156	0.101636	0.072383	0.054415	0.046278	0.041834	-1	1	-2	-3	-3	-1	-2	-2	-2	-2	0	-2	-1	-1	0	-2	1	9	2	-1	-1	-2	-2	-1	-2	-1	-2	3
2	0.046278	0.041834	0.041522	0.048556	0.058039	0.065797	0.080693	0.099860	0.119211	0.143083	0.166957	0.188318	0.195461	0.228823	0.250672	0.267212	0.258287	0.226074	0.161798	0.106982	0.065076	-3	-2	-1	-1	-4	-2	-2	-3	7	-3	-2	-2	-3	2	-3	-2	-2	-2	6	-1	-3	-4	-4	-3	-3	-4	-4	-3
2	0.250672	0.267212	0.258287	0.226074	0.161798	0.106982	0.065076	0.035360	0.026729	0.031756	0.039732	0.058599	0.085472	0.106046	0.122914	0.140911	0.158981	0.158969	0.167392	0	0	-2	-5	-6	-6	-4	-5	-5	-6	-1	5	1	-5	-1	4	-5	-5	-3	0	0	4	-2	-2	-1	3	-4	-3	-2	1
2	0.161798	0.106982	0.065076	0.035360	0.026729	0.031756	0.039732	0.058599	0.085472	0.106046	0.122914	0.140911	0.158981	0.158969	0.167392	0	0	0	0	0	0	0	-4	-3	4	-4	3	2	-5	0	-1	0	-2	0	-2	-4	-3	1	-5	-1	0	-2	-6	-6	-6	-4	-5	-6	-6
2	0.106982	0.065076	0.035360	0.026729	0.031756	0.039732	0.058599	0.085472	0.106046	0.122914	0.140911	0.158981	0.158969	0.167392	0	0	0	0	0	0	0	-2	-6	-6	-6	-4	-5	-6	-6	-6	6	2	-5	1	-1	-6	-5	-3	-1	-2	4	0	2	1	4	-6	0	3	-1
2	0.250985	0.228623	0.203749	0.169979	0.129506	0.123470	0.129456	0.130657	0.151447	0.179480	0.192953	0.185082	0.176094	0.151726	0.113363	0.078759	0.063859	0.061791	0.069881	0.082581	0.099323	-2	-1	-2	5	1	1	3	-3	-2	-3	-1	1	-2	-3	-2	-2	-2	-4	-2	-3	1	1	0	3	0	3	1	-3
2	0.151447	0.179480	0.192953	0.185082	0.176094	0.151726	0.113363	0.078759	0.063859	0.061791	0.069881	0.082581	0.099323	0.115303	0.115700	0.102241	0.091054	0.078564	0.065515	0.065983	0.075037	-1	-1	-1	2	-5	0	6	-2	-3	-4	-3	1	-4	-2	-3	-2	-2	-4	0	-3	-1	-5	-5	-6	-4	-4	-5	-5
2	0	0	0	0.805884	0.787795	0.740075	0.683728	0.634142	0.629962	0.602751	0.569465	0.540458	0.521054	0.469983	0.419808	0.377860	0.319396	0.252334	0.203183	0.150598	0.103275	0	0	0	0	0	0	0	0	0	0	0	0	0	0	0	0	0	0	0	0	0	0	0	0	0	0	0	0
2	0.065983	0.075037	0.105073	0.133709	0.161837	0.175699	0.192395	0.198805	0.202962	0.184133	0.177002	0.166161	0.137180	0.102407	0.093689	0.080724	0.063322	0.050682	0.043176	0.034861	0.026900	-1	-4	1	2	0	-4	-2	5	-4	-4	-2	-4	-1	1	-3	-1	-3	-4	1	-3	-2	-4	-2	-4	4	-3	-4	-3
2	0.133709	0.161837	0.175699	0.192395	0.198805	0.202962	0.184133	0.177002	0.166161	0.137180	0.102407	0.093689	0.080724	0.063322	0.050682	0.043176	0.034861	0.026900	0.020756	0.018411	0.014593	-2	8	-2	-4	-5	-2	-3	-2	-3	-5	-4	1	-4	-5	-1	-2	-3	-5	-4	-4	-3	0	5	6	-5	-2	-1	-3
2	0.249034	0.180213	0.146246	0.124399	0.116500	0.113596	0.124629	0.145008	0.174848	0.201897	0.215592	0.209784	0.187475	0.149784	0.109810	0.083680	0.072888	0.074777	0.086822	0.108059	0.132755	-1	-1	-1	1	-3	-1	1	-1	-2	0	1	-2	0	2	-2	0	1	-2	2	0	1	1	-1	0	-3	0	-1	-1
2	0.180213	0.146246	0.124399	0.116500	0.113596	0.124629	0.145008	0.174848	0.201897	0.215592	0.209784	0.187475	0.149784	0.109810	0.083680	0.072888	0.074777	0.086822	0.108059	0.132755	0.144430	1	1	-1	0	-3	0	-1	-1	1	0	0	-1	0	-2	-2	0	1	5	1	1	2	0	-2	-1	-2	-1	-1	-1
2	0.741954	0.736545	0.729616	0.701377	0.724269	0.746823	0.771810	0.794423	0.836624	0.829058	0.792594	0.739795	0.669948	0.586596	0.528781	0.467232	0.399917	0.357172	0.325591	0.268842	0.215424	1	0	-1	0	-2	-1	-1	1	-1	-2	-2	1	1	2	2	0	0	-4	1	-1	0	3	1	-1	-1	-1	-1	0
2	0.586596	0.528781	0.467232	0.399917	0.357172	0.325591	0.268842	0.215424	0.176253	0.135926	0.088698	0.074883	0.076608	0.083679	0.096247	0.113643	0.115224	0.104413	0.091652	0.077063	0.061938	1	1	-3	-1	0	-1	-1	0	0	0	1	-1	2	2	-1	-1	-1	1	1	0	-1	0	1	-1	-4	-2	1	1
2	0.268842	0.215424	0.176253	0.135926	0.088698	0.074883	0.076608	0.083679	0.096247	0.113643	0.115224	0.104413	0.091652	0.077063	0.061938	0.058879	0.064175	0.069599	0.071625	0.079657	0.095844	2	-2	-1	4	-2	-1	3	-1	-1	-4	-3	-1	-2	-3	0	-1	-2	1	-2	-3	1	-2	-1	3	-5	2	4	0
2	0.215424	0.176253	0.135926	0.088698	0.074883	0.076608	0.083679	0.096247	0.113643	0.115224	0.104413	0.091652	0.077063	0.061938	0.058879	0.064175	0.069599	0.071625	0.079657	0.095844	0.113484	1	-2	-1	3	-5	2	4	0	-1	-4	-2	-1	-3	-3	-2	-1	-1	-5	-3	-2	3	-2	-5	-4	4	-2	-5	-2
2	0.774228	0.724922	0.646325	0.571161	0.485547	0.423721	0.362865	0.312595	0.269637	0.244862	0.214442	0.192821	0.197726	0.198320	0.187445	0.164975	0.148418	0.124242	0.100665	0.097153	0.124404	0	0	-1	2	-4	1	1	2	1	-2	0	0	-1	0	0	-1	0	0	-1	-2	1	1	0	1	-4	0	1	-1
2	0.197726	0.198320	0.187445	0.164975	0.148418	0.124242	0.100665	0.097153	0.124404	0.164098	0.213709	0.246009	0.256061	0.240553	0.209124	0.163507	0.144658	0.157704	0.173933	0.196372	0.232572	3	-2	-5	-5	-2	-3	-5	-3	-3	4	1	-4	1	-2	-5	-3	-2	-6	-4	4	1	-3	-4	-4	1	-2	-4	-4
2	0.117927	0.107884	0.102068	0.100947	0.106937	0.115655	0.128985	0.139831	0.150294	0.137192	0.115730	0.091983	0.070130	0.043438	0.029708	0.026310	0.022962	0.018480	0.017046	0.016689	0.017049	-2	-2	-1	-3	-5	0	-2	-4	10	-2	-4	-3	-2	-3	-3	-3	-3	-2	-2	-3	2	-4	-1	-1	3	-3	-4	4
2	0.115655	0.128985	0.139831	0.150294	0.137192	0.115730	0.091983	0.070130	0.043438	0.029708	0.026310	0.022962	0.018480	0.017046	0.016689	0.017049	0.018862	0.022173	0.025766	0.032144	0.045243	-3	0	0	5	-3	-3	-1	0	-2	-4	-4	-1	-5	-5	-1	1	2	-2	1	-2	-1	0	-1	4	-4	0	4	-2
2	0.332486	0.375176	0.394100	0.386847	0.367149	0.323867	0.288755	0.252419	0.211786	0.154234	0.109178	0.064896	0.031477	0.016564	0.012665	0.012689	0.012690	0.017203	0.027208	0.039838	0.055473	1	-3	-3	-5	3	-1	-3	-2	-3	1	3	-4	2	2	0	-2	0	-1	-1	1	3	-3	-3	-3	0	-3	-4	2
2	0.032144	0.045243	0.072301	0.115705	0.197216	0.303265	0.407867	0.515272	0.597859	0.643781	0.650965	0.643224	0.613079	0.573815	0.544867	0.529422	0.508674	0.481304	0.477178	0.445621	0.396564	0	-3	-3	-3	-3	-3	-4	-2	0	1	0	-3	1	2	-1	0	0	6	2	2	3	-3	2	-2	-3	-1	-2	-1
2	0.045243	0.072301	0.115705	0.197216	0.303265	0.407867	0.515272	0.597859	0.643781	0.650965	0.643224	0.613079	0.573815	0.544867	0.529422	0.508674	0.481304	0.477178	0.445621	0.396564	0.357825	3	-3	2	-2	-3	-1	-2	-1	-1	1	0	-1	-1	0	-1	-1	2	1	-2	1	1	-3	-1	1	-3	-2	-1	1
2	0.643224	0.613079	0.573815	0.544867	0.529422	0.508674	0.481304	0.477178	0.445621	0.396564	0.357825	0.327044	0.281110	0.239137	0.210042	0.177799	0.143567	0.121899	0.105905	0.087607	0.077903	1	2	0	-1	-2	1	1	0	-1	-1	-2	1	-1	-2	2	0	-1	-3	-1	-1	1	0	1	1	-3	-1	0	-1
2	0.210042	0.177799	0.143567	0.121899	0.105905	0.087607	0.077903	0.079174	0.081968	0.083568	0.082184	0.075428	0.063282	0.053003	0.046915	0.049935	0.057256	0.069078	0.095253	0.118181	0.147872	1	-1	-2	-3	-2	-2	-2	-3	-1	1	1	-2	2	-1	-2	-2	-1	1	0	4	0	1	-2	-2	-1	-1	-2	1
2	0.121899	0.105905	0.087607	0.077903	0.079174	0.081968	0.083568	0.082184	0.075428	0.063282	0.053003	0.046915	0.049935	0.057256	0.069078	0.095253	0.118181	0.147872	0.179565	0.199307	0.196574	1	2	-1	0	-2	1	-1	1	1	0	-1	0	-1	-1	-2	-1	-1	2	-1	-1	1	1	-1	-2	-1	1	-1	1
2	0.079174	0.081968	0.083568	0.082184	0.075428	0.063282	0.053003	0.046915	0.049935	0.057256	0.069078	0.095253	0.118181	0.147872	0.179565	0.199307	0.196574	0.197909	0.201846	0.217400	0.246992	2	-1	3	-1	-1	-2	-2	-1	2	-2	-2	-3	1	-2	-2	1	2	-1	-1	-1	0	-3	-3	-3	-5	-3	-3	-4
2	0.197909	0.201846	0.217400	0.246992	0.286786	0.348499	0.368403	0.360556	0.341049	0.291557	0.220396	0.172348	0.136680	0.097359	0.082626	0.071108	0.063034	0.053171	0.057006	0.057829	0.053077	3	-2	-4	-3	1	-2	-2	0	2	0	0	-4	1	-1	-1	1	0	-5	0	1	-1	-2	2	-1	-5	-1	-3	5
2	0.014643	0.023528	0.036525	0.056689	0.076626	0.106291	0.126132	0.156815	0.201018	0.246520	0.268760	0.311744	0.327136	0.288838	0.232432	0.180610	0.111666	0.052697	0.025612	0.016018	0.012618	0	0	-5	-5	-3	-3	-4	-2	-1	4	1	-2	0	-3	-5	2	-1	4	0	1	-1	-1	5	1	-4	-1	0	0
2	0.023043	0.037311	0.050429	0.074621	0.088886	0.095003	0.092043	0.098756	0.090815	0.082561	0.078838	0.071942	0.052710	0.036371	0.031665	0.024379	0.021868	0.026660	0.029168	0.033844	0.053794	-4	-3	6	6	-6	-3	-2	-4	1	-6	-6	-3	-5	-5	-4	-1	-3	-7	-4	-6	-3	-4	-4	-5	-6	-4	-4	-5
2	0.092043	0.098756	0.090815	0.082561	0.078838	0.071942	0.052710	0.036371	0.031665	0.024379	0.021868	0.026660	0.029168	0.033844	0.053794	0.103897	0.170554	0.204860	0.254378	0	0	2	3	0	0	-3	-1	0	0	-1	-4	-4	1	-2	-4	-4	2	2	-4	-3	-4	2	-1	2	0	0	-2	-2	-4
2	0.052710	0.036371	0.031665	0.024379	0.021868	0.026660	0.029168	0.033844	0.053794	0.103897	0.170554	0.204860	0.254378	0	0	0	0	0	0	0	0	0	3	-1	3	-3	0	2	-4	1	-3	-2	2	-2	-4	-3	0	0	-3	-4	0	1	0	-4	-3	-1	0	-3	0
2	0.012665	0.012689	0.012690	0.017203	0.027208	0.039838	0.055473	0.070507	0.081312	0.087401	0.093281	0.106650	0.106766	0.099703	0.088862	0.070974	0.042010	0.026746	0.016674	0.010646	0.009146	1	-3	6	0	1	-3	-3	3	2	-6	-6	-3	-5	-5	-3	-2	-2	-6	-4	-4	4	-4	-4	-2	0	-4	-4	4
2	0	0	0	0	0	0.720391	0.752480	0.765289	0.707742	0.612212	0.539503	0.442475	0.338483	0.228162	0.164882	0.126390	0.112667	0.108740	0.110846	0.108796	0.129521	0	0	0	0	0	0	0	0	0	0	0	0	0	0	0	0	0	0	0	0	0	0	0	0	0	0	0	0
2	0.010646	0.009146	0.009726	0.014119	0.024727	0.052104	0.109755	0.167533	0.269489	0.370745	0.444235	0.513455	0.578867	0.605102	0.613713	0.616649	0.583504	0.548955	0.517029	0.453304	0.378261	-2	-6	-6	-6	-3	-6	-6	-6	-5	6	-1	-6	-1	-2	-6	-5	-2	-1	-3	5	-2	3	-1	3	-6	0	4	-4
2	0.009146	0.009726	0.014119	0.024727	0.052104	0.109755	0.167533	0.269489	0.370745	0.444235	0.513455	0.578867	0.605102	0.613713	0.616649	0.583504	0.548955	0.517029	0.453304	0.378261	0.304592	-2	3	-1	3	-6	0	4	-4	-1	-4	-4	2	-4	-6	-5	-1	-1	-6	-5	0	-2	-2	3	5	-4	-2	0	4
2	0.062260	0.084185	0.095140	0.111492	0.130944	0.181673	0.256341	0.340372	0.432768	0.532714	0.601080	0.670361	0.705683	0.713423	0.670208	0.610154	0.514272	0.421416	0.328739	0.291372	0.264855	-4	-5	-6	-6	-3	-6	-6	-7	-1	6	0	-6	0	2	-6	-5	-3	-5	-1	5	-1	-6	-6	-6	4	-5	-6	-5
2	0.084185	0.095140	0.111492	0.130944	0.181673	0.256341	0.340372	0.432768	0.532714	0.601080	0.670361	0.705683	0.713423	0.670208	0.610154	0.514272	0.421416	0.328739	0.291372	0.264855	0.256198	-1	-6	-6	-6	4	-5	-6	-5	-6	5	1	-6	3	3	-6	-5	-4	-5	-3	3	0	-4	-1	6	4	-3	3	-2
2	0.670361	0.705683	0.713423	0.670208	0.610154	0.514272	0.421416	0.328739	0.291372	0.264855	0.256198	0.262560	0.287756	0.283446	0.266227	0.235280	0.187546	0.128611	0.082177	0.050647	0.036390	-2	0	-1	3	-3	-2	-1	-2	-2	-3	-3	1	-3	-1	0	2	3	-2	-3	-2	-2	-1	2	0	-3	-1	-2	1
2	0.008622	0.007085	0.005579	0.005513	0.010584	0.023470	0.047523	0.089877	0.158737	0.246557	0.337723	0.412964	0.491288	0.544911	0.586594	0.608094	0.631384	0.629611	0.622688	0.569249	0.514507	3	-3	-2	-3	-2	-3	-3	4	-3	-4	-4	-3	-4	-5	-1	3	-2	-5	-4	-3	-4	-5	-5	-5	-4	-3	-5	-5
2	0.257982	0.245213	0.219961	0.178929	0.180265	0.191059	0.202336	0.223739	0.246361	0.231675	0.208043	0.188756	0.148047	0.108879	0.081553	0.065913	0.051371	0.050035	0.051996	0.052514	0.053396	-1	-2	-2	3	-5	3	4	-1	0	-3	-2	0	-2	-3	-3	-1	1	-6	-4	-2	-2	-5	-6	-5	-4	-4	-4	-3
2	0.051371	0.050035	0.051996	0.052514	0.053396	0.058592	0.061285	0.062495	0.072808	0.080561	0.084983	0.102192	0.146790	0.200114	0.256725	0.319550	0.397626	0.449619	0.471026	0.479647	0.487255	2	-1	-3	-5	2	1	-4	-1	-5	1	0	-4	7	-2	-5	-1	1	-5	-4	-1	1	-5	-4	-3	-4	-3	-4	-6
2	0.018313	0.030921	0.056076	0.079145	0.109065	0.151287	0.195658	0.207895	0.233722	0.262929	0.255654	0.235601	0.226985	0.197243	0.146732	0.118042	0.088384	0.064630	0.047636	0.037545	0.028476	-3	-5	-4	-6	0	-4	-5	-6	-6	3	3	-5	1	-3	-5	-4	0	-5	-4	5	-1	-4	-3	-4	-4	-1	-3	-3
2	0.151287	0.195658	0.207895	0.233722	0.262929	0.255654	0.235601	0.226985	0.197243	0.146732	0.118042	0.088384	0.064630	0.047636	0.037545	0.028476	0.023485	0.019959	0.015539	0.012350	0.010659	5	-4	-3	-3	-4	-3	2	2	-4	-5	-5	-3	-4	-5	-3	3	-2	-5	-5	-2	2	-5	-5	-5	-3	-4	-5	-1
2	0.233722	0.262929	0.255654	0.235601	0.226985	0.197243	0.146732	0.118042	0.088384	0.064630	0.047636	0.037545	0.028476	0.023485	0.019959	0.015539	0.012350	0.010659	0.010888	0.013759	0.019999	1	-3	-3	-4	-4	0	3	-5	0	1	2	-3	2	1	-4	-3	-1	-3	0	2	-2	-5	-6	-6	-3	-5	-6	-6
2	0.032013	0.034186	0.036102	0.039003	0.039424	0.033069	0.027075	0.024614	0.024470	0.029408	0.042245	0.054019	0.071565	0.100345	0.142235	0.179921	0.223580	0.278587	0.331673	0.350899	0.364433	-2	1	-4	-4	-3	1	1	-1	-2	0	-1	-2	-1	5	-5	-2	0	1	4	1	-1	2	-1	1	-1	1	2	-5
2	0.637874	0.614590	0.550835	0.459796	0.368957	0.271290	0.177137	0.112549	0.073642	0.050575	0.036422	0.032849	0.034697	0.035780	0.038795	0.042228	0.048317	0.055879	0.062399	0.071715	0.076441	2	1	0	0	0	-1	0	-1	0	-1	-1	-1	0	-1	1	0	0	-1	-1	0	0	0	1	1	0	-1	0	-1
2	0.038795	0.042228	0.048317	0.055879	0.062399	0.071715	0.076441	0.083979	0.101336	0.113268	0.113486	0.122570	0.121890	0.101299	0.083066	0.070536	0.051382	0.038298	0.029622	0.027628	0.026572	0	-4	5	-2	2	-3	-3	-2	-3	-4	-5	-3	-5	-5	-3	5	0	-6	-5	-3	-4	-5	-5	-3	-6	-4	-4	-5
2	0.062399	0.071715	0.076441	0.083979	0.101336	0.113268	0.113486	0.122570	0.121890	0.101299	0.083066	0.070536	0.051382	0.038298	0.029622	0.027628	0.026572	0.028079	0.030818	0.035035	0.040468	-4	8	-2	-4	-6	-2	-3	-4	-3	-6	-5	2	-4	-6	-4	0	-4	-6	-5	-5	-1	-2	0	3	-5	-2	1	-1
2	0.055239	0.060708	0.073083	0.092129	0.136354	0.213037	0.291450	0.393434	0.512716	0.621610	0.688669	0.761656	0.807170	0.819165	0.796666	0.819615	0.819755	0.812373	0.781073	0.789127	0.772786	-2	-4	-3	-4	-4	-3	-3	-4	-4	-5	-5	-3	-4	-5	-2	5	6	-6	-5	-4	-2	-5	-2	8	-6	-3	-1	-2
2	0.291450	0.393434	0.512716	0.621610	0.688669	0.761656	0.807170	0.819165	0.796666	0.819615	0.819755	0.812373	0.781073	0.789127	0.772786	0.803750	0.800204	0.786297	0.762157	0.709597	0.628745	-1	1	3	-1	4	-2	-2	-4	1	-4	-2	-1	-2	-3	-2	2	4	-5	-4	-3	0	0	-3	-2	-3	-2	-1	-4
2	0.819755	0.812373	0.781073	0.789127	0.772786	0.803750	0.800204	0.786297	0.762157	0.709597	0.628745	0.561397	0.492291	0.421445	0.381075	0.347603	0.329001	0.305099	0.283276	0.249180	0.218761	0	0	0	0	2	0	0	0	0	0	0	1	0	-1	0	0	0	0	0	0	0	0	0	0	0	0	0	0
2	0.128546	0.161774	0.197581	0.224987	0.227856	0.212147	0.176849	0.139685	0.104016	0.079992	0.059243	0.043745	0.031818	0.021860	0.012464	0.009669	0.008207	0.008599	0.008543	0.011056	0.014932	-2	-1	-4	-5	-1	-4	-4	-5	-1	0	0	-4	-1	-2	-5	-3	-3	-4	1	6	1	1	3	-3	-2	1	0	-3
2	0.043745	0.031818	0.021860	0.012464	0.009669	0.008207	0.008599	0.008543	0.011056	0.014932	0.018737	0.022413	0.025929	0.029271	0.037613	0.054135	0.079075	0.103922	0.126164	0.133700	0.125500	-3	-6	-6	-7	-5	-6	-6	-6	-5	1	2	-6	2	7	-6	-5	-4	2	1	1	1	-4	-6	-6	0	-4	-5	-5
2	0.011056	0.014932	0.018737	0.022413	0.025929	0.029271	0.037613	0.054135	0.079075	0.103922	0.126164	0.133700	0.125500	0.103848	0.082148	0.057250	0.038011	0.027017	0.020241	0.012435	0.009290	3	-5	-4	-5	-1	-3	-4	-4	-1	-1	-5	-4	-3	-6	7	-3	-1	-6	-5	-1	7	-4	-3	-5	-2	-2	-4	-3
2	0.008658	0.008167	0.009160	0.010320	0.018071	0.037004	0.088966	0.185010	0.295656	0.420260	0.545241	0.634680	0.726038	0.776733	0.807867	0.801219	0.795559	0.729061	0.672340	0.592350	0.517182	-5	-5	-1	8	-7	-3	-1	-4	-2	-6	-7	-4	-4	-7	-5	-3	-4	-7	-6	-6	-4	-6	-6	-6	-3	-6	-6	-7
2	0.008167	0.009160	0.010320	0.018071	0.037004	0.088966	0.185010	0.295656	0.420260	0.545241	0.634680	0.726038	0.776733	0.807867	0.801219	0.795559	0.729061	0.672340	0.592350	0.517182	0.432054	-4	-6	-6	-6	-3	-6	-6	-7	-6	5	4	-6	-1	3	-6	-5	-4	-5	-3	2	0	-5	-5	-6	0	-5	-5	-5
2	0.088966	0.185010	0.295656	0.420260	0.545241	0.634680	0.726038	0.776733	0.807867	0.801219	0.795559	0.729061	0.672340	0.592350	0.517182	0.432054	0.361713	0.293680	0.240035	0.183383	0.147381	-3	-4	-4	-3	-5	-4	-2	-4	-4	-3	1	-3	2	-4	7	-3	-1	-5	-4	-3	-2	0	4	4	-4	0	3	-3
2	0.295656	0.420260	0.545241	0.634680	0.726038	0.776733	0.807867	0.801219	0.795559	0.729061	0.672340	0.592350	0.517182	0.432054	0.361713	0.293680	0.240035	0.183383	0.147381	0.124772	0.095240	3	0	-1	-1	-1	-1	2	0	-1	-1	-1	0	-1	-2	-1	1	-1	-1	-2	-2	-1	0	-1	0	-1	-1	1	-1
2	0.776733	0.807867	0.801219	0.795559	0.729061	0.672340	0.592350	0.517182	0.432054	0.361713	0.293680	0.240035	0.183383	0.147381	0.124772	0.095240	0.077969	0.072712	0.061435	0.057738	0.047004	0	0	0	1	0	0	0	0	0	0	0	0	0	0	0	0	0	1	0	0	0	0	0	0	0	0	0	0
2	0.072712	0.061435	0.057738	0.047004	0.036149	0.030408	0.025795	0.024157	0.019560	0.017894	0.018952	0.016707	0.013680	0.013016	0.011596	0.010091	0.010333	0.009452	0.014254	0.015908	0.021580	-2	0	-1	6	-4	-2	1	2	-1	-4	-6	2	-4	-6	-2	-1	-3	-6	-5	-5	-4	-4	3	-4	-2	-3	-4	-5
2	0.017894	0.018952	0.016707	0.013680	0.013016	0.011596	0.010091	0.010333	0.009452	0.014254	0.015908	0.021580	0.026841	0.034309	0.039039	0.045055	0.060902	0.081226	0.093134	0.117417	0.137762	-3	-5	-6	-6	4	-4	-6	-3	-6	2	3	-5	-1	2	-6	-3	-3	-5	-2	4	-2	2	-1	-1	-4	1	-2	-3
2	0.016707	0.013680	0.013016	0.011596	0.010091	0.010333	0.009452	0.014254	0.015908	0.021580	0.026841	0.034309	0.039039	0.045055	0.060902	0.081226	0.093134	0.117417	0.137762	0.174466	0.212847	0	-5	0	-4	-1	-2	-5	7	-3	-6	-6	-4	-5	-5	-5	-1	-4	-3	-3	-3	0	2	-3	-4	-4	0	-2	-2
2	0.010091	0.010333	0.009452	0.014254	0.015908	0.021580	0.026841	0.034309	0.039039	0.045055	0.060902	0.081226	0.093134	0.117417	0.137762	0.174466	0.212847	0.255601	0.295233	0.326634	0.362903	0	0	-4	-3	1	0	-2	-2	3	-2	0	-1	3	0	-5	-1	1	-1	4	1	-3	-3	-3	-4	-2	-4	-4	-5
2	0.026841	0.034309	0.039039	0.045055	0.060902	0.081226	0.093134	0.117417	0.137762	0.174466	0.212847	0.255601	0.295233	0.326634	0.362903	0.406360	0.457585	0.494350	0.547614	0.558841	0.566298	-2	4	1	-2	-5	3	2	-4	3	-4	-5	4	-2	-6	-4	-2	-1	-6	-4	-3	-3	0	-5	-4	-1	-2	-4	-6
2	0.093134	0.117417	0.137762	0.174466	0.212847	0.255601	0.295233	0.326634	0.362903	0.406360	0.457585	0.494350	0.547614	0.558841	0.566298	0.555996	0.536797	0.518303	0.531539	0.558089	0.593543	-2	-1	0	1	-4	-3	0	6	-3	-6	-6	-2	-4	-4	-5	-2	-4	-5	-4	-6	-1	1	1	-1	-5	3	4	-1
2	0.174466	0.212847	0.255601	0.295233	0.326634	0.362903	0.406360	0.457585	0.494350	0.547614	0.558841	0.566298	0.555996	0.536797	0.518303	0.531539	0.558089	0.593543	0.630932	0.657544	0.667295	-3	1	0	-3	-2	0	-3	-5	3	2	1	1	0	0	-5	-2	1	-5	-1	3	1	-3	-2	-1	1	-2	0	4
2	0.295233	0.326634	0.362903	0.406360	0.457585	0.494350	0.547614	0.558841	0.566298	0.555996	0.536797	0.518303	0.531539	0.558089	0.593543	0.630932	0.657544	0.667295	0.662522	0.647752	0.659391	1	1	-1	-3	-5	1	2	-2	-2	-4	-4	3	-4	-5	5	-1	-1	-5	-3	-3	0	-3	-3	-3	-4	-3	-4	6
2	0.558841	0.566298	0.555996	0.536797	0.518303	0.531539	0.558089	0.593543	0.630932	0.657544	0.667295	0.662522	0.647752	0.659391	0.676309	0.712925	0.736713	0.761388	0.781435	0.802619	0.806609	0	3	-2	-2	-5	0	1	-3	1	-5	-4	4	-4	-2	4	-2	-2	-5	-4	-4	-3	8	-3	-4	0	-1	-3	-5
2	0.667295	0.662522	0.647752	0.659391	0.676309	0.712925	0.736713	0.761388	0.781435	0.802619	0.806609	0.806545	0.811157	0.819000	0	0	0	0	0	0	0	0	3	0	-2	-3	1	-2	-3	-3	-1	-1	0	-2	4	-3	-2	2	-3	-2	1	-1	-2	4	3	-4	0	-1	2
2	0.035120	0.036185	0.049139	0.068734	0.102883	0.150716	0.229159	0.294903	0.337166	0.348878	0.341865	0.286953	0.265155	0.232212	0.230469	0.235901	0.233181	0.197318	0.181583	0.144349	0.107656	-5	-5	-2	8	-7	-3	0	-4	-4	-6	-7	-4	-6	-7	-5	-3	-4	-7	-6	-6	2	-5	-4	0	0	-3	-3	-2
2	0	0	0.434412	0.371149	0.332911	0.249196	0.153489	0.103470	0.073270	0.043242	0.029485	0.026283	0.025380	0.027341	0.032208	0.038268	0.041051	0.042355	0.040426	0.033931	0.029452	0	0	0	0	0	0	0	0	0	0	0	0	0	0	0	0	0	0	0	0	0	0	0	0	0	0	0	0
2	0.223160	0.298492	0.346246	0.384751	0.428622	0.436789	0.445278	0.474445	0.472248	0.456696	0.449240	0.449631	0.437633	0.433609	0.417512	0.406535	0.412715	0.416695	0.425674	0.412847	0.366879	-2	1	-3	-4	-4	2	-2	-2	0	1	2	2	-2	0	0	-3	1	0	1	1	1	-2	-2	4	-4	1	4	-2
2	0.528470	0.515494	0.469376	0.415272	0.400004	0.360568	0.339349	0.332934	0.358262	0.357430	0.338135	0.303733	0.270131	0.224922	0.164309	0.136425	0.126850	0.122452	0.126545	0.135960	0.157113	2	-1	1	0	-2	-1	0	1	-1	-1	-1	0	-2	-1	0	-1	-1	-2	2	1	-1	0	-3	-2	0	0	-2	-3
2	0.426756	0.348442	0.292291	0.231875	0.178338	0.137720	0.104748	0.077241	0.062061	0.063376	0.059621	0.048387	0.041576	0.034306	0.028442	0.021979	0.021929	0.023044	0.024900	0.035021	0.044146	1	-1	-2	1	-4	2	3	1	-1	-3	-2	1	2	-2	0	-2	-1	-2	-3	-3	-1	0	0	5	-4	0	2	-3
2	0.048387	0.041576	0.034306	0.028442	0.021979	0.021929	0.023044	0.024900	0.035021	0.044146	0.046121	0.050200	0.052994	0.046392	0.041577	0.052701	0.061232	0.081142	0.096482	0.110602	0.111707	-4	-5	-4	-4	-5	-5	-3	-1	-4	-1	2	-5	-1	7	-6	-5	-4	4	4	-1	-3	-1	5	6	-6	-1	0	-3
2	0.041576	0.034306	0.028442	0.021979	0.021929	0.023044	0.024900	0.035021	0.044146	0.046121	0.050200	0.052994	0.046392	0.041577	0.052701	0.061232	0.081142	0.096482	0.110602	0.111707	0.102899	-3	-1	5	6	-6	-1	0	-3	-1	-6	-5	-2	-3	-6	-4	-2	-3	-7	-5	-5	4	-5	-5	-3	2	-4	-4	-4
2	0.021929	0.023044	0.024900	0.035021	0.044146	0.046121	0.050200	0.052994	0.046392	0.041577	0.052701	0.061232	0.081142	0.096482	0.110602	0.111707	0.102899	0.085754	0.077999	0.075764	0.085652	-5	-3	-6	-7	-5	-5	-6	-2	-5	0	-1	-6	-2	2	-6	-5	-3	12	1	-3	5	-3	-5	-5	0	-4	-3	-3
2	0.052994	0.046392	0.041577	0.052701	0.061232	0.081142	0.096482	0.110602	0.111707	0.102899	0.085754	0.077999	0.075764	0.085652	0.107580	0.130077	0.140194	0.144062	0.149041	0.164323	0.171978	5	-3	-3	-4	-1	-4	-4	-1	-3	-2	-2	-4	1	-2	-1	3	-2	-2	-4	-2	-1	-3	-2	-3	-5	-3	-3	7
2	0.077999	0.075764	0.085652	0.107580	0.130077	0.140194	0.144062	0.149041	0.164323	0.171978	0.201898	0.254314	0.289662	0.329174	0.407253	0.442769	0.449227	0.460927	0.456274	0.418578	0.402745	-1	-3	-2	-2	1	0	-2	-4	10	-4	-3	-3	-3	0	-4	-1	-3	-4	0	-4	-2	-2	-1	-3	-1	-1	-1	-2
2	0.164323	0.171978	0.201898	0.254314	0.289662	0.329174	0.407253	0.442769	0.449227	0.460927	0.456274	0.418578	0.402745	0.386567	0.351682	0.294038	0.227796	0.165191	0.104546	0.071897	0.061875	-2	-1	3	4	-4	2	-1	-2	0	-4	-4	0	-4	-2	5	0	-3	-5	-4	-4	-2	-4	-1	-3	-2	-3	-3	-4
2	0.289662	0.329174	0.407253	0.442769	0.449227	0.460927	0.456274	0.418578	0.402745	0.386567	0.351682	0.294038	0.227796	0.165191	0.104546	0.071897	0.061875	0.057390	0.058703	0.061453	0.057406	0	-3	1	-2	-4	-1	-2	0	-1	-4	-4	-3	-4	-3	0	3	5	1	-3	-4	-3	-1	4	5	1	-1	1	-1
2	0.386567	0.351682	0.294038	0.227796	0.165191	0.104546	0.071897	0.061875	0.057390	0.058703	0.061453	0.057406	0.050545	0.045215	0.039775	0.035351	0.034538	0.035665	0.040790	0.039553	0.039616	0	-3	-1	-3	0	1	-4	0	-1	-3	-3	-2	-2	1	6	-1	-2	0	2	-2	-3	1	0	-2	1	1	-2	2
2	0.325829	0.303932	0.255476	0.206469	0.164300	0.126519	0.102998	0.090486	0.082266	0.077188	0.068031	0.069911	0.071598	0.067424	0.063145	0.058475	0.046525	0.034780	0.029614	0.021799	0.016881	-1	1	3	2	-3	3	-1	0	-1	-3	-3	1	-4	-5	0	0	1	0	-3	-2	-1	1	1	1	-5	3	0	-3
2	0.644239	0.588463	0.503849	0.401195	0.318610	0.250529	0.218913	0.218889	0.230819	0.218276	0.202085	0.166338	0.116260	0.077828	0.050783	0.028254	0.014702	0.009260	0.006663	0.005366	0.003090	-1	-1	-2	-2	-5	-2	-1	-5	-3	-5	-3	0	-4	-3	0	-2	2	11	0	-4	1	-3	-1	4	-5	0	4	-4
2	0.019319	0.020945	0.026917	0.030727	0.037632	0.044838	0.054270	0.070393	0.125067	0.187484	0.250822	0.295117	0.311155	0.272277	0.220945	0.154395	0.102206	0.068646	0.052394	0.041764	0.044613	0	-3	-5	-2	-1	-4	1	0	-2	3	1	-1	1	2	-5	-2	-1	-5	0	2	-2	-3	-5	-1	-4	-2	-5	-6
2	0.026917	0.030727	0.037632	0.044838	0.054270	0.070393	0.125067	0.187484	0.250822	0.295117	0.311155	0.272277	0.220945	0.154395	0.102206	0.068646	0.052394	0.041764	0.044613	0.055729	0.076097	-5	-5	-6	-6	-5	-5	-5	-2	-4	-1	-4	-5	0	2	-6	-5	-5	12	2	-1	-2	-5	0	-1	1	-2	-5	-4
2	0.054270	0.070393	0.125067	0.187484	0.250822	0.295117	0.311155	0.272277	0.220945	0.154395	0.102206	0.068646	0.052394	0.041764	0.044613	0.055729	0.076097	0.093115	0.112817	0.145155	0.175124	1	-5	-1	2	-1	-3	-1	4	-3	-4	-4	-3	-3	-1	1	1	0	5	0	-3	2	-3	1	-4	-2	-2	-4	-1
2	0.154395	0.102206	0.068646	0.052394	0.041764	0.044613	0.055729	0.076097	0.093115	0.112817	0.145155	0.175124	0.191833	0.230509	0.254059	0.288216	0.317700	0.304329	0.272154	0.241461	0.194804	0	0	-2	-2	-2	-2	-4	-1	-4	-1	1	-3	3	0	-2	2	-1	6	2	0	0	1	0	2	-5	1	3	-2
2	0.318610	0.250529	0.218913	0.218889	0.230819	0.218276	0.202085	0.166338	0.116260	0.077828	0.050783	0.028254	0.014702	0.009260	0.006663	0.005366	0.003090	0.002415	0.001922	0.001758	0.001962	1	1	0	5	-5	0	0	-4	0	-3	-3	1	-2	-5	-4	0	-2	-6	-5	2	2	1	-1	-1	-5	4	0	-3
2	0.272154	0.241461	0.194804	0.149472	0.141944	0.144535	0.181597	0.231704	0.296204	0.395058	0.463442	0.516086	0.520162	0.510071	0.487955	0.503940	0.525499	0.583714	0.624164	0.654498	0.657824	-1	-1	3	4	-1	-2	-1	-1	2	-1	-2	-2	-2	-3	-1	0	-1	-5	-1	2	-2	6	0	-1	0	-1	-1	-1
2	0.525499	0.583714	0.624164	0.654498	0.657824	0.587300	0.501530	0.430768	0.331211	0.243172	0.205926	0.169817	0.127881	0.106327	0.076936	0.049774	0.028271	0.022739	0.023044	0.032894	0.060063	-1	3	-1	-5	3	0	-2	-2	0	1	-1	0	1	0	-1	0	-1	-5	3	0	-1	-3	3	2	-5	-1	0	3
2	0.218913	0.218889	0.230819	0.218276	0.202085	0.166338	0.116260	0.077828	0.050783	0.028254	0.014702	0.009260	0.006663	0.005366	0.003090	0.002415	0.001922	0.001758	0.001962	0.002407	0.004356	-3	5	-1	1	-6	-1	0	-3	5	-5	-4	2	-3	-3	-1	-2	-3	-3	2	-5	0	-1	0	-1	-5	2	2	-3
2	0.122413	0.103553	0.091390	0.088206	0.091815	0.086437	0.080531	0.077266	0.065925	0.058213	0.056177	0.049845	0.046943	0.050553	0.054332	0.057559	0.072131	0.090710	0.107017	0.128246	0.154801	-2	-5	-5	-6	-1	-5	-5	-5	-5	3	5	-2	3	-1	-5	-3	-4	-5	-4	2	-2	-5	-5	-6	-4	-4	-4	-4
2	0.049845	0.046943	0.050553	0.054332	0.057559	0.072131	0.090710	0.107017	0.128246	0.154801	0.183020	0.219952	0.282849	0.324107	0.343559	0.372339	0.380887	0.349327	0.329919	0.316444	0.249347	-2	-1	5	1	-4	-2	-2	4	1	-5	-5	-3	-4	-4	-4	0	-2	0	-1	-5	1	-4	0	-3	3	0	-2	5
2	0.138016	0.103594	0.071847	0.082862	0.097100	0.104872	0.100439	0.103019	0.098806	0.089958	0.092683	0.103145	0.100602	0.111952	0.140466	0.159086	0.170520	0.206160	0.217508	0.212258	0.221262	-1	6	-1	-5	-2	-2	-3	-4	-2	2	-1	-2	-2	-1	-3	-1	0	-5	-3	1	-2	-5	-2	-6	-2	-5	-5	-6
2	0.206160	0.217508	0.212258	0.221262	0.248584	0.290290	0.366567	0.438997	0.476308	0.496143	0.496311	0.462289	0.427438	0.396279	0.381012	0.327650	0.275223	0.216482	0.162985	0.103976	0.069193	2	-3	1	1	-5	-2	0	5	-3	-6	-6	-1	-5	-6	-4	1	-3	-5	-4	-5	0	-4	0	-3	4	-2	-3	-3
2	0.427438	0.396279	0.381012	0.327650	0.275223	0.216482	0.162985	0.103976	0.069193	0.040328	0.023980	0.015332	0.010694	0.009535	0.009550	0.008939	0.010167	0.011197	0.013179	0.014532	0.014870	-2	-2	0	1	-3	0	1	-1	-2	-2	-2	1	-2	-1	1	1	4	-1	0	-3	-1	-1	2	2	-2	-1	1	0
2	0.010167	0.011197	0.013179	0.014532	0.014870	0.023202	0.037373	0.059464	0.091120	0.131136	0.171933	0.232940	0.326822	0.398274	0.437287	0.456250	0.460224	0.419776	0.379029	0.388555	0.407916	4	-5	-3	-3	0	-4	-5	-3	-2	1	2	-5	1	-2	-5	-1	-3	-1	0	1	-3	-5	-2	-3	-2	-2	-5	-4
2	0.322160	0.253555	0.182029	0.138023	0.113111	0.127592	0.142748	0.159130	0.170603	0.165215	0.153515	0.144977	0.136305	0.120772	0.121386	0.127261	0.141281	0.174321	0.197355	0.217395	0.220546	0	-3	-2	-2	-5	-2	-1	-5	-1	1	3	-2	2	0	-5	-2	2	1	-2	3	-2	-3	-5	-4	-1	-4	-4	-4
2	0.113111	0.127592	0.142748	0.159130	0.170603	0.165215	0.153515	0.144977	0.136305	0.120772	0.121386	0.127261	0.141281	0.174321	0.197355	0.217395	0.220546	0.219839	0.204672	0.190425	0.184507	-1	-3	2	1	-6	0	-1	5	0	-4	-6	0	-5	-4	-1	0	-3	-6	-1	-4	-1	0	-2	-1	-5	2	3	1
2	0.136305	0.120772	0.121386	0.127261	0.141281	0.174321	0.197355	0.217395	0.220546	0.219839	0.204672	0.190425	0.184507	0.168776	0.149428	0.136185	0.120935	0.097612	0.088054	0.100952	0.113356	-2	0	1	2	-2	-1	1	-3	0	0	-2	0	-1	-2	-2	1	3	-6	0	0	1	-2	1	3	-6	-3	1	4
2	0.120772	0.121386	0.127261	0.141281	0.174321	0.197355	0.217395	0.220546	0.219839	0.204672	0.190425	0.184507	0.168776	0.149428	0.136185	0.120935	0.097612	0.088054	0.100952	0.113356	0.125333	1	-2	1	3	-6	-3	1	4	1	-4	-4	0	-5	-6	1	-1	-2	-6	-5	-5	-1	0	3	3	-6	0	1	2
2	0	0	0	0	0	0	0.743503	0.782616	0.811033	0.831416	0.840866	0.791393	0.734602	0.710280	0.686558	0.658841	0.661476	0.644239	0.588463	0.503849	0.401195	0	0	0	0	0	0	0	0	0	0	0	0	0	0	0	0	0	0	0	0	0	0	0	0	0	0	0	0
2	0.084106	0.151206	0.259445	0.370128	0.476487	0.593768	0.686242	0.720626	0.746740	0.738240	0.705538	0.663143	0.591111	0.517862	0.459649	0.390227	0.306096	0.253859	0.222982	0.183639	0.150022	3	-4	-3	-4	-4	-2	-2	5	-4	-4	-4	-2	-2	-5	-4	2	-2	-5	-4	-4	-2	-3	-2	-2	-1	-1	-3	1
2	0.116571	0.109910	0.122409	0.147394	0.168660	0.184861	0.196323	0.188291	0.200417	0.213280	0.265283	0.330337	0.416573	0.466145	0.493682	0.518562	0.502449	0.470115	0.460324	0.444240	0.443745	2	-1	-1	-2	-3	-1	-1	3	2	-2	-2	-1	0	-3	-1	2	-2	-3	-1	-2	-2	-2	-3	2	-4	-1	6	-2
2	0.265283	0.330337	0.416573	0.466145	0.493682	0.518562	0.502449	0.470115	0.460324	0.444240	0.443745	0.484811	0.535028	0.578133	0.598069	0.617647	0.594877	0.555536	0.488995	0.426756	0.348442	-1	0	0	0	-5	1	2	-1	1	-3	-2	1	-1	1	4	-1	-2	-5	-1	-3	-2	-1	1	2	-5	0	1	3
2	0	0	0.743503	0.782616	0.811033	0.831416	0.840866	0.791393	0.734602	0.710280	0.686558	0.658841	0.661476	0.644239	0.588463	0.503849	0.401195	0.318610	0.250529	0.218913	0.218889	0	0	0	0	0	0	0	0	0	0	0	0	0	0	0	0	0	0	0	0	0	0	0	0	0	0	0	0
2	0.443745	0.484811	0.535028	0.578133	0.598069	0.617647	0.594877	0.555536	0.488995	0.426756	0.348442	0.292291	0.231875	0.178338	0.137720	0.104748	0.077241	0.062061	0.063376	0.059621	0.048387	0	1	0	1	-5	1	1	-1	-4	-1	-2	2	1	-1	0	0	0	3	-4	-1	-1	0	0	0	-5	1	0	-1
[truncated: 617 more columns]
