# Supplementary material for: Prediction of carbamylated lysine sites based on the one-class k -nearest neighbor method
Source: Royal Society of Chemistry journal article supplement (doi:10.1039/c3mb70195f), 2013-08-13
Supplement: c3mb70195f.xlsx [file c3mb70195f.xlsx]

## Sheet: Train
class	Uniprot ID	site
positive	D0VX06	145
positive	O66990	143
positive	O93627	189
positive	O98949	210
positive	P00876	201
positive	P04718	191
positive	P0A1V8	75
positive	P11498	741
positive	P13661	74
positive	P14489	70
positive	P18314	217
positive	P22188	225
positive	P39377	162
positive	P41020	219
positive	P69996	219
positive	P81006	147
positive	Q03BX7	166
positive	Q0PQZ5	147
positive	Q2K340	718
positive	Q42813	252
positive	Q45515	150
positive	Q4A724	153
positive	Q4EFN5	154
positive	Q55DL0	158
positive	Q5L1E2	173
positive	Q65YW7	129
positive	Q6XEC0	73
positive	Q746K1	229
positive	Q7MVW1	149
positive	Q7SIE9	149
positive	Q7WU28	392
positive	Q837K0	152
positive	Q8RLA6	84
positive	Q8U2I8	294
positive	Q93LD7	168
positive	Q97VT7	137
positive	Q9A4Z9	211
positive	Q9P903	167
positive	Q9RVU2	143
positive	Q9WYE2	338
negative	D0VX06	140
negative	D0VX06	150
negative	D0VX06	158
negative	D0VX06	169
negative	D0VX06	19
negative	D0VX06	200
negative	D0VX06	201
negative	D0VX06	218
negative	D0VX06	259
negative	D0VX06	287
negative	D0VX06	3
negative	D0VX06	303
negative	D0VX06	57
negative	D0VX06	59
negative	O66990	112
negative	O66990	114
negative	O66990	129
negative	O66990	132
negative	O66990	134
negative	O66990	165
negative	O66990	185
negative	O66990	236
negative	O66990	246
negative	O66990	248
negative	O66990	251
negative	O66990	283
negative	O66990	284
negative	O66990	295
negative	O66990	3
negative	O66990	30
negative	O66990	314
negative	O66990	32
negative	O66990	33
negative	O66990	340
negative	O66990	346
negative	O66990	347
negative	O66990	36
negative	O66990	368
negative	O66990	382
negative	O66990	394
negative	O66990	403
negative	O66990	406
negative	O66990	408
negative	O66990	414
negative	O66990	417
negative	O66990	421
negative	O66990	49
negative	O66990	7
negative	O66990	72
negative	O93627	116
negative	O93627	119
negative	O93627	131
negative	O93627	148
negative	O93627	15
negative	O93627	153
negative	O93627	163
negative	O93627	165
negative	O93627	175
negative	O93627	21
negative	O93627	211
negative	O93627	215
negative	O93627	22
negative	O93627	223
negative	O93627	224
negative	O93627	250
negative	O93627	303
negative	O93627	322
negative	O93627	327
negative	O93627	343
negative	O93627	355
negative	O93627	360
negative	O93627	4
negative	O93627	426
negative	O93627	429
negative	O93627	437
negative	O93627	73
negative	O98949	137
negative	O98949	140
negative	O98949	155
negative	O98949	17
negative	O98949	173
negative	O98949	184
negative	O98949	186
negative	O98949	192
negative	O98949	203
negative	O98949	236
negative	O98949	245
negative	O98949	267
negative	O98949	290
negative	O98949	30
negative	O98949	313
negative	O98949	324
negative	O98949	342
negative	O98949	355
negative	O98949	361
negative	O98949	381
negative	O98949	41
negative	O98949	458
negative	O98949	471
negative	O98949	8
negative	O98949	92
negative	O98949	95
negative	P00876	128
negative	P00876	14
negative	P00876	146
negative	P00876	161
negative	P00876	164
negative	P00876	175
negative	P00876	177
negative	P00876	18
negative	P00876	183
negative	P00876	21
negative	P00876	227
negative	P00876	236
negative	P00876	252
negative	P00876	305
negative	P00876	316
negative	P00876	32
negative	P00876	334
negative	P00876	429
negative	P00876	450
negative	P00876	463
negative	P00876	477
negative	P00876	8
negative	P00876	81
negative	P00876	94
negative	P04718	122
negative	P04718	13
negative	P04718	148
negative	P04718	166
negative	P04718	168
negative	P04718	174
negative	P04718	226
negative	P04718	300
negative	P04718	31
negative	P04718	310
negative	P04718	329
negative	P04718	33
negative	P04718	361
negative	P04718	431
negative	P04718	453
negative	P04718	82
negative	P04718	98
negative	P0A1V8	130
negative	P0A1V8	136
negative	P0A1V8	142
negative	P0A1V8	143
negative	P0A1V8	177
negative	P0A1V8	194
negative	P0A1V8	210
negative	P0A1V8	248
negative	P0A1V8	33
negative	P0A1V8	41
negative	P0A1V8	65
negative	P0A1V8	66
negative	P11498	1021
negative	P11498	104
negative	P11498	1043
negative	P11498	1056
negative	P11498	1061
negative	P11498	107
negative	P11498	1090
negative	P11498	1096
negative	P11498	1103
negative	P11498	1106
negative	P11498	1109
negative	P11498	1119
negative	P11498	1124
negative	P11498	1130
negative	P11498	1133
negative	P11498	1144
negative	P11498	1159
negative	P11498	1164
negative	P11498	148
negative	P11498	152
negative	P11498	194
negative	P11498	237
negative	P11498	241
negative	P11498	273
negative	P11498	297
negative	P11498	3
negative	P11498	300
negative	P11498	319
negative	P11498	35
negative	P11498	38
negative	P11498	39
negative	P11498	428
negative	P11498	434
negative	P11498	442
negative	P11498	456
negative	P11498	499
negative	P11498	519
negative	P11498	588
negative	P11498	589
negative	P11498	600
negative	P11498	661
negative	P11498	667
negative	P11498	717
negative	P11498	748
negative	P11498	79
negative	P11498	855
negative	P11498	886
negative	P11498	888
negative	P11498	891
negative	P11498	892
negative	P11498	906
negative	P11498	912
negative	P11498	966
negative	P11498	969
negative	P11498	992
negative	P13661	100
negative	P13661	112
negative	P13661	129
negative	P13661	134
negative	P13661	136
negative	P13661	140
negative	P13661	153
negative	P13661	169
negative	P13661	181
negative	P13661	190
negative	P13661	2
negative	P13661	211
negative	P13661	215
negative	P13661	238
negative	P13661	242
negative	P13661	262
negative	P13661	264
negative	P13661	265
negative	P13661	60
negative	P13661	62
negative	P13661	90
negative	P13661	94
negative	P13661	97
negative	P14489	100
negative	P14489	134
negative	P14489	137
negative	P14489	138
negative	P14489	152
negative	P14489	177
negative	P14489	182
negative	P14489	189
negative	P14489	2
negative	P14489	205
negative	P14489	228
negative	P14489	246
negative	P14489	251
negative	P14489	256
negative	P14489	30
negative	P14489	45
negative	P14489	49
negative	P14489	61
negative	P14489	84
negative	P14489	91
negative	P14489	95
negative	P18314	124
negative	P18314	196
negative	P18314	20
negative	P18314	382
negative	P18314	401
negative	P18314	406
negative	P18314	428
negative	P18314	44
negative	P18314	443
negative	P18314	449
negative	P18314	49
negative	P18314	515
negative	P18314	522
negative	P18314	83
negative	P18314	89
negative	P18314	98
negative	P22188	120
negative	P22188	151
negative	P22188	198
negative	P22188	252
negative	P22188	275
negative	P22188	331
negative	P22188	351
negative	P22188	367
negative	P22188	379
negative	P22188	392
negative	P22188	394
negative	P22188	439
negative	P22188	456
negative	P22188	466
negative	P22188	68
negative	P39377	119
negative	P39377	150
negative	P39377	194
negative	P39377	206
negative	P39377	207
negative	P39377	225
negative	P39377	247
negative	P39377	319
negative	P39377	34
negative	P39377	345
negative	P39377	373
negative	P39377	377
negative	P39377	380
negative	P39377	384
negative	P41020	126
negative	P41020	168
negative	P41020	181
negative	P41020	184
negative	P41020	198
negative	P41020	2
negative	P41020	32
negative	P41020	325
negative	P41020	382
negative	P41020	384
negative	P41020	385
negative	P41020	394
negative	P41020	403
negative	P41020	408
negative	P41020	430
negative	P41020	440
negative	P41020	445
negative	P41020	451
negative	P41020	47
negative	P41020	496
negative	P41020	506
negative	P41020	510
negative	P41020	517
negative	P41020	524
negative	P41020	525
negative	P41020	528
negative	P41020	546
negative	P41020	558
negative	P41020	83
negative	P41020	89
negative	P41020	98
negative	P69996	102
negative	P69996	109
negative	P69996	180
negative	P69996	198
negative	P69996	2
negative	P69996	20
negative	P69996	240
negative	P69996	288
negative	P69996	3
negative	P69996	326
negative	P69996	329
negative	P69996	382
negative	P69996	384
negative	P69996	385
negative	P69996	391
negative	P69996	394
negative	P69996	403
negative	P69996	408
negative	P69996	430
negative	P69996	44
negative	P69996	445
negative	P69996	451
negative	P69996	484
negative	P69996	486
negative	P69996	49
negative	P69996	501
negative	P69996	504
negative	P69996	517
negative	P69996	524
negative	P69996	525
negative	P69996	550
negative	P69996	555
negative	P69996	559
negative	P69996	63
negative	P69996	7
negative	P69996	83
negative	P69996	89
negative	P69996	92
negative	P69996	98
negative	P81006	109
negative	P81006	110
negative	P81006	111
negative	P81006	118
negative	P81006	137
negative	P81006	195
negative	P81006	198
negative	P81006	203
negative	P81006	229
negative	P81006	25
negative	P81006	28
negative	P81006	283
negative	P81006	321
negative	P81006	326
negative	P81006	330
negative	P81006	352
negative	P81006	367
negative	P81006	370
negative	P81006	378
negative	P81006	399
negative	P81006	410
negative	P81006	436
negative	P81006	458
negative	P81006	50
negative	P81006	69
negative	P81006	7
negative	Q03BX7	124
negative	Q03BX7	155
negative	Q03BX7	158
negative	Q03BX7	193
negative	Q03BX7	198
negative	Q03BX7	203
negative	Q03BX7	25
negative	Q03BX7	250
negative	Q03BX7	254
negative	Q03BX7	255
negative	Q03BX7	258
negative	Q03BX7	333
negative	Q03BX7	351
negative	Q03BX7	352
negative	Q03BX7	365
negative	Q03BX7	42
negative	Q03BX7	50
negative	Q03BX7	63
negative	Q03BX7	95
negative	Q0PQZ5	109
negative	Q0PQZ5	139
negative	Q0PQZ5	141
negative	Q0PQZ5	153
negative	Q0PQZ5	18
negative	Q0PQZ5	193
negative	Q0PQZ5	22
negative	Q0PQZ5	252
negative	Q0PQZ5	275
negative	Q0PQZ5	292
negative	Q0PQZ5	322
negative	Q0PQZ5	371
negative	Q0PQZ5	378
negative	Q0PQZ5	379
negative	Q0PQZ5	396
negative	Q0PQZ5	399
negative	Q0PQZ5	404
negative	Q0PQZ5	418
negative	Q0PQZ5	441
negative	Q0PQZ5	466
negative	Q0PQZ5	6
negative	Q2K340	1028
negative	Q2K340	1030
negative	Q2K340	105
negative	Q2K340	1062
negative	Q2K340	1078
negative	Q2K340	1119
negative	Q2K340	1128
negative	Q2K340	1138
negative	Q2K340	114
negative	Q2K340	1146
negative	Q2K340	124
negative	Q2K340	154
negative	Q2K340	166
negative	Q2K340	187
negative	Q2K340	193
negative	Q2K340	202
negative	Q2K340	209
negative	Q2K340	245
negative	Q2K340	269
negative	Q2K340	28
negative	Q2K340	292
negative	Q2K340	319
negative	Q2K340	38
negative	Q2K340	404
negative	Q2K340	446
negative	Q2K340	45
negative	Q2K340	468
negative	Q2K340	475
negative	Q2K340	492
negative	Q2K340	496
negative	Q2K340	5
negative	Q2K340	515
negative	Q2K340	519
negative	Q2K340	528
negative	Q2K340	529
negative	Q2K340	538
negative	Q2K340	637
negative	Q2K340	645
negative	Q2K340	675
negative	Q2K340	694
negative	Q2K340	698
negative	Q2K340	709
negative	Q2K340	725
negative	Q2K340	730
negative	Q2K340	734
negative	Q2K340	79
negative	Q2K340	829
negative	Q2K340	849
negative	Q2K340	880
negative	Q2K340	886
negative	Q2K340	923
negative	Q2K340	939
negative	Q2K340	940
negative	Q2K340	943
negative	Q2K340	946
negative	Q2K340	957
negative	Q2K340	966
negative	Q2K340	970
negative	Q2K340	971
negative	Q2K340	989
negative	Q42813	126
negative	Q42813	143
negative	Q42813	183
negative	Q42813	19
negative	Q42813	21
negative	Q42813	227
negative	Q42813	229
negative	Q42813	235
negative	Q42813	277
negative	Q42813	281
negative	Q42813	287
negative	Q42813	306
negative	Q42813	342
negative	Q42813	371
negative	Q42813	39
negative	Q42813	390
negative	Q42813	398
negative	Q42813	40
negative	Q42813	417
negative	Q42813	461
negative	Q42813	465
negative	Q42813	479
negative	Q42813	482
negative	Q42813	500
negative	Q42813	506
negative	Q42813	514
negative	Q42813	524
negative	Q42813	526
negative	Q42813	544
negative	Q42813	545
negative	Q42813	81
negative	Q42813	84
negative	Q42813	9
negative	Q45515	102
negative	Q45515	103
negative	Q45515	111
negative	Q45515	115
negative	Q45515	139
negative	Q45515	156
negative	Q45515	174
negative	Q45515	195
negative	Q45515	196
negative	Q45515	248
negative	Q45515	255
negative	Q45515	27
negative	Q45515	277
negative	Q45515	284
negative	Q45515	294
negative	Q45515	3
negative	Q45515	305
negative	Q45515	322
negative	Q45515	325
negative	Q45515	334
negative	Q45515	355
negative	Q45515	356
negative	Q45515	374
negative	Q45515	381
negative	Q45515	382
negative	Q45515	422
negative	Q45515	441
negative	Q45515	446
negative	Q45515	454
negative	Q45515	457
negative	Q45515	469
negative	Q45515	6
negative	Q45515	71
negative	Q45515	97
negative	Q4A724	101
negative	Q4A724	103
negative	Q4A724	107
negative	Q4A724	122
negative	Q4A724	143
negative	Q4A724	146
negative	Q4A724	148
negative	Q4A724	167
negative	Q4A724	17
negative	Q4A724	198
negative	Q4A724	209
negative	Q4A724	217
negative	Q4A724	221
negative	Q4A724	226
negative	Q4A724	229
negative	Q4A724	244
negative	Q4A724	256
negative	Q4A724	261
negative	Q4A724	265
negative	Q4A724	286
negative	Q4A724	288
negative	Q4A724	29
negative	Q4A724	305
negative	Q4A724	311
negative	Q4A724	323
negative	Q4A724	331
negative	Q4A724	338
negative	Q4A724	341
negative	Q4A724	347
negative	Q4A724	348
negative	Q4A724	4
negative	Q4A724	51
negative	Q4A724	54
negative	Q4A724	78
negative	Q4A724	87
negative	Q4EFN5	104
negative	Q4EFN5	106
negative	Q4EFN5	110
negative	Q4EFN5	130
negative	Q4EFN5	149
negative	Q4EFN5	168
negative	Q4EFN5	181
negative	Q4EFN5	202
negative	Q4EFN5	226
negative	Q4EFN5	230
negative	Q4EFN5	242
negative	Q4EFN5	244
negative	Q4EFN5	276
negative	Q4EFN5	280
negative	Q4EFN5	293
negative	Q4EFN5	294
negative	Q4EFN5	306
negative	Q4EFN5	312
negative	Q4EFN5	315
negative	Q4EFN5	316
negative	Q4EFN5	329
negative	Q4EFN5	330
negative	Q4EFN5	45
negative	Q4EFN5	47
negative	Q4EFN5	61
negative	Q4EFN5	83
negative	Q4EFN5	97
negative	Q55DL0	117
negative	Q55DL0	118
negative	Q55DL0	123
negative	Q55DL0	13
negative	Q55DL0	150
negative	Q55DL0	164
negative	Q55DL0	179
negative	Q55DL0	182
negative	Q55DL0	203
negative	Q55DL0	204
negative	Q55DL0	25
negative	Q55DL0	259
negative	Q55DL0	262
negative	Q55DL0	307
negative	Q55DL0	334
negative	Q55DL0	338
negative	Q55DL0	343
negative	Q55DL0	36
negative	Q55DL0	367
negative	Q55DL0	391
negative	Q55DL0	40
negative	Q55DL0	411
negative	Q55DL0	415
negative	Q55DL0	431
negative	Q55DL0	45
negative	Q55DL0	451
negative	Q55DL0	456
negative	Q55DL0	479
negative	Q55DL0	487
negative	Q55DL0	49
negative	Q55DL0	491
negative	Q55DL0	499
negative	Q55DL0	503
negative	Q55DL0	56
negative	Q5L1E2	117
negative	Q5L1E2	147
negative	Q5L1E2	162
negative	Q5L1E2	163
negative	Q5L1E2	18
negative	Q5L1E2	188
negative	Q5L1E2	19
negative	Q5L1E2	194
negative	Q5L1E2	206
negative	Q5L1E2	217
negative	Q5L1E2	222
negative	Q5L1E2	224
negative	Q5L1E2	226
negative	Q5L1E2	287
negative	Q5L1E2	401
negative	Q5L1E2	45
negative	Q5L1E2	47
negative	Q5L1E2	68
negative	Q5L1E2	71
negative	Q5L1E2	76
negative	Q5L1E2	98
negative	Q65YW7	196
negative	Q65YW7	260
negative	Q65YW7	308
negative	Q65YW7	38
negative	Q6XEC0	116
negative	Q6XEC0	137
negative	Q6XEC0	175
negative	Q6XEC0	180
negative	Q6XEC0	192
negative	Q6XEC0	208
negative	Q6XEC0	218
negative	Q6XEC0	23
negative	Q6XEC0	255
negative	Q6XEC0	259
negative	Q6XEC0	262
negative	Q6XEC0	29
negative	Q6XEC0	39
negative	Q6XEC0	51
negative	Q6XEC0	60
negative	Q6XEC0	87
negative	Q6XEC0	94
negative	Q746K1	151
negative	Q746K1	153
negative	Q746K1	188
negative	Q746K1	238
negative	Q746K1	239
negative	Q746K1	271
negative	Q746K1	273
negative	Q746K1	34
negative	Q7MVW1	111
negative	Q7MVW1	138
negative	Q7MVW1	142
negative	Q7MVW1	15
negative	Q7MVW1	164
negative	Q7MVW1	169
negative	Q7MVW1	184
negative	Q7MVW1	192
negative	Q7MVW1	196
negative	Q7MVW1	198
negative	Q7MVW1	2
negative	Q7MVW1	244
negative	Q7MVW1	258
negative	Q7MVW1	284
negative	Q7MVW1	290
negative	Q7MVW1	291
negative	Q7MVW1	322
negative	Q7MVW1	360
negative	Q7MVW1	373
negative	Q7MVW1	432
negative	Q7MVW1	74
negative	Q7SIE9	109
negative	Q7SIE9	111
negative	Q7SIE9	128
negative	Q7SIE9	132
negative	Q7SIE9	155
negative	Q7SIE9	17
negative	Q7SIE9	173
negative	Q7SIE9	195
negative	Q7SIE9	201
negative	Q7SIE9	242
negative	Q7SIE9	252
negative	Q7SIE9	271
negative	Q7SIE9	283
negative	Q7SIE9	293
negative	Q7SIE9	297
negative	Q7SIE9	323
negative	Q7SIE9	327
negative	Q7SIE9	369
negative	Q7SIE9	372
negative	Q7SIE9	380
negative	Q7SIE9	405
negative	Q7SIE9	433
negative	Q7SIE9	445
negative	Q7SIE9	449
negative	Q7SIE9	48
negative	Q7SIE9	5
negative	Q7SIE9	71
negative	Q7SIE9	79
negative	Q7WU28	120
negative	Q7WU28	123
negative	Q7WU28	129
negative	Q7WU28	132
negative	Q7WU28	133
negative	Q7WU28	143
negative	Q7WU28	145
negative	Q7WU28	156
negative	Q7WU28	157
negative	Q7WU28	163
negative	Q7WU28	177
negative	Q7WU28	188
negative	Q7WU28	193
negative	Q7WU28	196
negative	Q7WU28	207
negative	Q7WU28	234
negative	Q7WU28	236
negative	Q7WU28	255
negative	Q7WU28	259
negative	Q7WU28	27
negative	Q7WU28	277
negative	Q7WU28	287
negative	Q7WU28	288
negative	Q7WU28	292
negative	Q7WU28	299
negative	Q7WU28	3
negative	Q7WU28	304
negative	Q7WU28	305
negative	Q7WU28	308
negative	Q7WU28	340
negative	Q7WU28	341
negative	Q7WU28	352
negative	Q7WU28	354
negative	Q7WU28	369
negative	Q7WU28	37
negative	Q7WU28	370
negative	Q7WU28	372
negative	Q7WU28	379
negative	Q7WU28	383
negative	Q7WU28	417
negative	Q7WU28	426
negative	Q7WU28	451
negative	Q7WU28	459
negative	Q7WU28	466
negative	Q7WU28	472
negative	Q7WU28	481
negative	Q7WU28	492
negative	Q7WU28	503
negative	Q7WU28	504
negative	Q7WU28	506
negative	Q7WU28	516
negative	Q7WU28	517
negative	Q7WU28	520
negative	Q7WU28	526
negative	Q7WU28	535
negative	Q7WU28	54
negative	Q7WU28	551
negative	Q7WU28	562
negative	Q7WU28	566
negative	Q7WU28	574
negative	Q7WU28	577
negative	Q7WU28	59
negative	Q7WU28	73
negative	Q7WU28	85
negative	Q7WU28	96
negative	Q837K0	106
negative	Q837K0	117
negative	Q837K0	131
negative	Q837K0	138
negative	Q837K0	139
negative	Q837K0	172
negative	Q837K0	203
negative	Q837K0	214
negative	Q837K0	225
negative	Q837K0	227
negative	Q837K0	23
negative	Q837K0	236
negative	Q837K0	25
negative	Q837K0	26
negative	Q837K0	263
negative	Q837K0	290
negative	Q837K0	304
negative	Q837K0	307
negative	Q837K0	318
negative	Q837K0	325
negative	Q837K0	339
negative	Q837K0	352
negative	Q837K0	359
negative	Q837K0	39
negative	Q837K0	64
negative	Q837K0	78
negative	Q837K0	79
negative	Q837K0	8
negative	Q8RLA6	104
negative	Q8RLA6	108
negative	Q8RLA6	109
negative	Q8RLA6	117
negative	Q8RLA6	147
negative	Q8RLA6	150
negative	Q8RLA6	173
negative	Q8RLA6	194
negative	Q8RLA6	2
negative	Q8RLA6	202
negative	Q8RLA6	203
negative	Q8RLA6	208
negative	Q8RLA6	214
negative	Q8RLA6	218
negative	Q8RLA6	24
negative	Q8RLA6	242
negative	Q8RLA6	243
negative	Q8RLA6	253
negative	Q8RLA6	26
negative	Q8RLA6	267
negative	Q8RLA6	3
negative	Q8RLA6	40
negative	Q8RLA6	43
negative	Q8RLA6	58
negative	Q8RLA6	61
negative	Q8RLA6	75
negative	Q8RLA6	96
negative	Q8U2I8	118
negative	Q8U2I8	128
negative	Q8U2I8	129
negative	Q8U2I8	176
negative	Q8U2I8	184
negative	Q8U2I8	187
negative	Q8U2I8	206
negative	Q8U2I8	21
negative	Q8U2I8	211
negative	Q8U2I8	216
negative	Q8U2I8	219
negative	Q8U2I8	23
negative	Q8U2I8	245
negative	Q8U2I8	248
negative	Q8U2I8	260
negative	Q8U2I8	274
negative	Q8U2I8	282
negative	Q8U2I8	29
negative	Q8U2I8	326
negative	Q8U2I8	337
negative	Q8U2I8	351
negative	Q8U2I8	36
negative	Q8U2I8	384
negative	Q8U2I8	387
negative	Q8U2I8	413
negative	Q8U2I8	419
negative	Q8U2I8	426
negative	Q8U2I8	483
negative	Q8U2I8	501
negative	Q8U2I8	51
negative	Q8U2I8	52
negative	Q8U2I8	87
negative	Q8U2I8	89
negative	Q93LD7	174
negative	Q93LD7	184
negative	Q93LD7	284
negative	Q93LD7	292
negative	Q93LD7	338
negative	Q93LD7	76
negative	Q93LD7	81
negative	Q93LD7	9
negative	Q97VT7	123
negative	Q97VT7	132
negative	Q97VT7	14
negative	Q97VT7	147
negative	Q97VT7	151
negative	Q97VT7	161
negative	Q97VT7	164
negative	Q97VT7	194
negative	Q97VT7	210
negative	Q97VT7	211
negative	Q97VT7	215
negative	Q97VT7	234
negative	Q97VT7	244
negative	Q97VT7	250
negative	Q97VT7	267
negative	Q97VT7	271
negative	Q97VT7	273
negative	Q97VT7	292
negative	Q97VT7	306
negative	Q97VT7	310
negative	Q97VT7	311
negative	Q97VT7	54
negative	Q97VT7	62
negative	Q97VT7	8
negative	Q97VT7	81
negative	Q97VT7	84
negative	Q9A4Z9	121
negative	Q9A4Z9	122
negative	Q9A4Z9	184
negative	Q9A4Z9	197
negative	Q9A4Z9	203
negative	Q9A4Z9	204
negative	Q9A4Z9	236
negative	Q9A4Z9	248
negative	Q9A4Z9	282
negative	Q9A4Z9	287
negative	Q9A4Z9	30
negative	Q9A4Z9	306
negative	Q9A4Z9	307
negative	Q9A4Z9	317
negative	Q9A4Z9	331
negative	Q9A4Z9	334
negative	Q9A4Z9	338
negative	Q9A4Z9	355
negative	Q9A4Z9	386
negative	Q9A4Z9	415
negative	Q9A4Z9	421
negative	Q9A4Z9	427
negative	Q9A4Z9	44
negative	Q9A4Z9	6
negative	Q9A4Z9	63
negative	Q9A4Z9	64
negative	Q9P903	104
negative	Q9P903	105
negative	Q9P903	115
negative	Q9P903	141
negative	Q9P903	191
negative	Q9P903	207
negative	Q9P903	266
negative	Q9P903	271
negative	Q9P903	274
negative	Q9P903	30
negative	Q9P903	327
negative	Q9P903	341
negative	Q9P903	345
negative	Q9P903	367
negative	Q9P903	373
negative	Q9P903	383
negative	Q9P903	419
negative	Q9P903	430
negative	Q9P903	438
negative	Q9P903	459
negative	Q9P903	460
negative	Q9P903	465
negative	Q9P903	467
negative	Q9P903	472
negative	Q9P903	489
negative	Q9P903	498
negative	Q9P903	500
negative	Q9P903	504
negative	Q9P903	510
negative	Q9P903	516
negative	Q9P903	519
negative	Q9P903	522
negative	Q9P903	529
negative	Q9P903	539
negative	Q9P903	70
negative	Q9P903	9
negative	Q9RVU2	108
negative	Q9RVU2	285
negative	Q9WYE2	104
negative	Q9WYE2	115
negative	Q9WYE2	116
negative	Q9WYE2	120
negative	Q9WYE2	127
negative	Q9WYE2	138
negative	Q9WYE2	146
negative	Q9WYE2	150
negative	Q9WYE2	159
negative	Q9WYE2	207
negative	Q9WYE2	22
negative	Q9WYE2	230
negative	Q9WYE2	232
negative	Q9WYE2	236
negative	Q9WYE2	245
negative	Q9WYE2	26
negative	Q9WYE2	263
negative	Q9WYE2	279
negative	Q9WYE2	28
negative	Q9WYE2	317
negative	Q9WYE2	328
negative	Q9WYE2	350
negative	Q9WYE2	367
negative	Q9WYE2	379
negative	Q9WYE2	395
negative	Q9WYE2	420
negative	Q9WYE2	424
negative	Q9WYE2	432
negative	Q9WYE2	433
negative	Q9WYE2	5
negative	Q9WYE2	52
negative	Q9WYE2	75
negative	Q9WYE2	85
negative	Q9WYE2	9
negative	Q9WYE2	95

## Sheet: Test
class	Uniprot ID	site
positive	O25323	205
positive	P05020	103
positive	Q0PBP6	92
positive	Q4ADX2	122
positive	Q7CS13	173
positive	Q8VTT5	148
negative	O25323	102
negative	O25323	106
negative	O25323	115
negative	O25323	12
negative	O25323	127
negative	O25323	131
negative	O25323	144
negative	O25323	151
negative	O25323	158
negative	O25323	159
negative	O25323	176
negative	O25323	18
negative	O25323	211
negative	O25323	213
negative	O25323	217
negative	O25323	30
negative	O25323	44
negative	O25323	50
negative	O25323	56
negative	O25323	70
negative	O25323	71
negative	O25323	79
negative	O25323	9
negative	O25323	93
negative	O25323	95
negative	P05020	132
negative	P05020	173
negative	P05020	182
negative	P05020	227
negative	P05020	260
negative	P05020	27
negative	P05020	347
negative	P05020	9
negative	Q0PBP6	115
negative	Q0PBP6	147
negative	Q0PBP6	151
negative	Q0PBP6	154
negative	Q0PBP6	160
negative	Q0PBP6	169
negative	Q0PBP6	176
negative	Q0PBP6	2
negative	Q0PBP6	201
negative	Q0PBP6	209
negative	Q0PBP6	213
negative	Q0PBP6	218
negative	Q0PBP6	231
negative	Q0PBP6	243
negative	Q0PBP6	246
negative	Q0PBP6	270
negative	Q0PBP6	280
negative	Q0PBP6	288
negative	Q0PBP6	293
negative	Q0PBP6	295
negative	Q0PBP6	298
negative	Q0PBP6	305
negative	Q0PBP6	316
negative	Q0PBP6	330
negative	Q0PBP6	334
negative	Q0PBP6	4
negative	Q0PBP6	50
negative	Q0PBP6	53
negative	Q0PBP6	58
negative	Q0PBP6	61
negative	Q0PBP6	74
negative	Q0PBP6	79
negative	Q0PBP6	85
negative	Q4ADX2	115
negative	Q4ADX2	138
negative	Q4ADX2	152
negative	Q4ADX2	238
negative	Q4ADX2	261
negative	Q4ADX2	27
negative	Q4ADX2	325
negative	Q4ADX2	33
negative	Q4ADX2	348
negative	Q7CS13	128
negative	Q7CS13	151
negative	Q7CS13	190
negative	Q7CS13	193
negative	Q7CS13	194
negative	Q7CS13	197
negative	Q7CS13	200
negative	Q7CS13	21
negative	Q7CS13	234
negative	Q7CS13	27
negative	Q7CS13	271
negative	Q7CS13	308
negative	Q7CS13	370
negative	Q7CS13	396
negative	Q7CS13	43
negative	Q7CS13	63
negative	Q7CS13	8
negative	Q8VTT5	106
negative	Q8VTT5	114
negative	Q8VTT5	166
negative	Q8VTT5	170
negative	Q8VTT5	173
negative	Q8VTT5	194
negative	Q8VTT5	200
negative	Q8VTT5	24
negative	Q8VTT5	251
negative	Q8VTT5	27
negative	Q8VTT5	270
negative	Q8VTT5	282
negative	Q8VTT5	292
negative	Q8VTT5	293
negative	Q8VTT5	320
negative	Q8VTT5	323
negative	Q8VTT5	371
negative	Q8VTT5	379
negative	Q8VTT5	419
negative	Q8VTT5	421
negative	Q8VTT5	425
negative	Q8VTT5	432
negative	Q8VTT5	448
negative	Q8VTT5	451
negative	Q8VTT5	454
negative	Q8VTT5	456
negative	Q8VTT5	6
