# Supplementary material for: Prediction of carbamylated lysine sites based on the one-class k -nearest neighbor method
Source: Royal Society of Chemistry journal article supplement (doi:10.1039/c3mb70195f), 2013-08-13
Supplement: c3mb70195f_2.csv [file c3mb70195f_2.csv]

class	AA1_disorder	AA2_disorder	AA3_disorder	AA4_disorder	AA5_disorder	AA6_disorder	AA7_disorder	AA8_disorder	AA9_disorder	AA10_disorder	AA11_disorder	AA12_disorder	AA13_disorder	AA14_disorder	AA15_disorder	AA16_disorder	AA17_disorder	AA18_disorder	AA19_disorder	AA20_disorder	AA21_disorder	AA1_pssm_1	AA1_pssm_2	AA1_pssm_3	AA1_pssm_4	AA1_pssm_5	AA1_pssm_6	AA1_pssm_7	AA1_pssm_8	AA1_pssm_9	AA1_pssm_10	AA1_pssm_11	AA1_pssm_12	AA1_pssm_13	AA1_pssm_14	AA1_pssm_15	AA1_pssm_16	AA1_pssm_17	AA1_pssm_18	AA1_pssm_19	AA1_pssm_20	AA2_pssm_1	AA2_pssm_2	AA2_pssm_3	AA2_pssm_4	AA2_pssm_5	AA2_pssm_6	AA2_pssm_7	AA2_pssm_8
1	0.148440	0.110885	0.069375	0.047578	0.030335	0.022055	0.016099	0.012635	0.011064	0.009992	0.008683	0.009368	0.009900	0.013698	0.023878	0.047330	0.077145	0.121975	0.188878	0.267847	0.383536	-1	0	-1	2	-2	0	-1	-2	0	1	1	0	0	-2	-1	0	0	1	-1	0	3	-2	0	0	-1	-1	0	0
1	0.329588	0.260144	0.213954	0.188318	0.173547	0.145479	0.124944	0.112997	0.109867	0.115533	0.116780	0.128466	0.158659	0.212726	0.277525	0.366125	0.466021	0.537941	0.574497	0.591317	0.615795	4	-4	-1	-3	-1	-2	-2	2	0	0	0	-4	4	-1	-2	-2	-3	-4	-2	-2	2	2	-2	-3	-4	-1	-2	0
1	0.420656	0.377373	0.335522	0.284738	0.219360	0.171209	0.121773	0.079999	0.051333	0.040279	0.030735	0.027091	0.025597	0.025589	0.031385	0.045646	0.068824	0.107259	0.155714	0.203540	0.233614	2	0	-1	0	-3	1	2	3	-1	-2	-1	1	-2	-5	-2	-1	-1	-5	-3	-2	3	0	-2	-1	-3	0	2	0
1	0.102053	0.086663	0.064585	0.044081	0.033780	0.025105	0.020572	0.017001	0.018796	0.019448	0.021458	0.023945	0.029677	0.030751	0.037334	0.043276	0.049667	0.057154	0.086216	0.103482	0.124701	3	3	-1	0	-5	0	0	-1	-1	-4	-3	3	-4	-5	1	0	-1	-6	-4	-3	0	1	-4	-3	1	1	-1	-2
1	0.325695	0.366946	0.396522	0.397705	0.384131	0.363283	0.356706	0.355817	0.390785	0.418052	0.449353	0.467367	0.476467	0.455453	0.462903	0.476829	0.506389	0.547131	0.600433	0.626345	0.632886	2	2	-2	-1	-4	0	2	-1	-2	0	-1	2	-1	-1	-4	-1	-1	-4	-2	-1	2	1	-1	2	-4	1	3	-2
1	0.092756	0.067820	0.049070	0.029950	0.018439	0.013998	0.010921	0.008754	0.009275	0.010809	0.012062	0.016108	0.023769	0.030961	0.036921	0.054632	0.084811	0.113716	0.156321	0.197409	0.231670	2	1	-2	2	-3	0	2	-1	-2	0	-2	1	-1	-4	1	0	0	-6	-4	-1	-2	-5	-6	-6	-1	-3	-5	-6
2	0.034792	0.035295	0.029025	0.023039	0.019388	0.017428	0.015005	0.014576	0.017136	0.020237	0.023438	0.029358	0.035201	0.044695	0.059810	0.083825	0.102530	0.134296	0.187815	0.253965	0.305204	-1	1	4	-3	-5	5	-2	-4	-3	-1	-3	-2	0	-5	-4	1	2	-6	-5	1	-4	0	-3	-4	-6	-1	-2	-5
2	0.019388	0.017428	0.015005	0.014576	0.017136	0.020237	0.023438	0.029358	0.035201	0.044695	0.059810	0.083825	0.102530	0.134296	0.187815	0.253965	0.305204	0.369651	0.406922	0.418661	0.407834	-1	5	5	-3	-4	-1	-3	-3	2	-4	-4	-1	-3	-2	-5	-1	0	0	3	-4	-4	-6	-6	-6	-4	-5	-6	-7
2	0.044695	0.059810	0.083825	0.102530	0.134296	0.187815	0.253965	0.305204	0.369651	0.406922	0.418661	0.407834	0.389558	0.353233	0.316334	0.274764	0.237712	0.212081	0.205860	0.196847	0.189066	-1	0	-1	-2	1	0	-3	-2	-1	3	2	0	0	-2	-5	-3	-2	-2	-3	3	-1	1	0	3	-4	2	4	-1
2	0.802434	0.741644	0.657203	0.545636	0.424513	0.327129	0.253057	0.187996	0.146355	0.129697	0.107586	0.103685	0.103228	0.099628	0.094010	0.096846	0.089214	0.079837	0.078487	0.073354	0.063020	-3	-2	1	-4	-4	2	-2	-5	-4	-2	2	0	8	-3	-5	-3	-2	-4	-4	-1	-3	0	5	5	-5	-2	-1	-2
2	0.389558	0.353233	0.316334	0.274764	0.237712	0.212081	0.205860	0.196847	0.189066	0.174761	0.156576	0.130546	0.121791	0.105587	0.094983	0.078585	0.060914	0.036219	0.022421	0.013910	0.008413	-1	-2	1	2	-5	-1	2	-2	-2	-4	-3	-1	-3	-4	6	-1	-1	-6	-5	-4	0	0	1	3	-3	2	3	-2
2	0.237712	0.212081	0.205860	0.196847	0.189066	0.174761	0.156576	0.130546	0.121791	0.105587	0.094983	0.078585	0.060914	0.036219	0.022421	0.013910	0.008413	0.006562	0.006533	0.006271	0.007176	0	0	0	2	-5	0	5	-4	-1	-5	-5	3	-4	-6	-1	-1	-2	-6	-5	-4	1	0	-3	1	-5	1	5	-3
2	0.036219	0.022421	0.013910	0.008413	0.006562	0.006533	0.006271	0.007176	0.007982	0.008481	0.009530	0.011342	0.011978	0.012416	0.014670	0.017499	0.018563	0.018237	0.017110	0.015052	0.012603	7	-4	-4	-5	1	-4	-4	-2	-5	-2	-3	-3	-2	-5	-4	-2	-2	-6	-5	-1	-3	-4	6	6	-6	-2	-1	-3
2	0.007176	0.007982	0.008481	0.009530	0.011342	0.011978	0.012416	0.014670	0.017499	0.018563	0.018237	0.017110	0.015052	0.012603	0.014577	0.023884	0.038834	0.059702	0.082493	0.102237	0.114140	5	-4	-3	-4	3	-4	-4	1	-2	0	-2	-4	-3	-4	-4	-2	-2	-3	-3	1	-2	-4	-5	-6	4	-5	-6	0
2	0.014670	0.017499	0.018563	0.018237	0.017110	0.015052	0.012603	0.014577	0.023884	0.038834	0.059702	0.082493	0.102237	0.114140	0.130641	0.170930	0.208449	0.246472	0.297546	0.335600	0.337030	3	-5	-5	-5	2	-4	-5	-4	-5	2	-3	-3	-2	-4	3	-3	-1	-6	-5	4	0	-3	-4	-6	-2	-5	-5	-6
2	0.017499	0.018563	0.018237	0.017110	0.015052	0.012603	0.014577	0.023884	0.038834	0.059702	0.082493	0.102237	0.114140	0.130641	0.170930	0.208449	0.246472	0.297546	0.335600	0.337030	0.326743	0	-3	-4	-6	-2	-5	-5	-6	-6	2	-2	-5	-1	-3	-1	-3	-3	-6	-3	7	-5	-4	-1	8	-6	-3	-1	-4
2	0.297546	0.335600	0.337030	0.326743	0.303548	0.270187	0.231933	0.210980	0.211879	0.220908	0.233704	0.247706	0.239722	0.225331	0.216815	0.203766	0.197275	0.197084	0.199364	0.186602	0.171984	-3	-2	2	3	-4	-1	-1	-1	-2	-5	-5	2	-4	-5	-1	3	3	-5	-4	-4	-1	-1	-2	-1	-3	-2	0	-3
2	0.253057	0.187996	0.146355	0.129697	0.107586	0.103685	0.103228	0.099628	0.094010	0.096846	0.089214	0.079837	0.078487	0.073354	0.063020	0.053230	0.045201	0.036577	0.029218	0.028930	0.027624	-3	-5	-6	-6	-4	-3	-5	-5	-2	3	4	-3	0	4	-6	-5	-4	-3	4	-1	-2	3	0	0	0	1	2	-5
2	0.016099	0.012635	0.011064	0.009992	0.008683	0.009368	0.009900	0.013698	0.023878	0.047330	0.077145	0.121975	0.188878	0.267847	0.383536	0.529199	0.602425	0.684830	0	0	0	-2	3	0	1	0	0	4	-3	-1	2	-1	-1	-3	-4	-2	-2	-2	-2	-3	-2	-1	-4	-4	-5	-3	-4	-3	-3
2	0.011064	0.009992	0.008683	0.009368	0.009900	0.013698	0.023878	0.047330	0.077145	0.121975	0.188878	0.267847	0.383536	0.529199	0.602425	0.684830	0	0	0	0	0	-4	-3	0	-4	-6	-2	-2	-5	11	-6	-6	-4	-4	-4	-5	-2	-4	-5	-1	-6	4	-4	-3	-4	4	-3	-4	4
2	0.009900	0.013698	0.023878	0.047330	0.077145	0.121975	0.188878	0.267847	0.383536	0.529199	0.602425	0.684830	0	0	0	0	0	0	0	0	0	-3	-5	-3	1	-1	-5	-4	-6	-6	4	0	-4	-2	-2	-5	-5	-3	-4	-4	6	0	1	0	0	2	2	4	-3
2	0.078487	0.073354	0.063020	0.053230	0.045201	0.036577	0.029218	0.028930	0.027624	0.023464	0.020197	0.020279	0.018618	0.018807	0.018750	0.017789	0.015529	0.014620	0.016663	0.019910	0.026292	1	-3	-2	-1	-2	-3	0	6	-2	-5	-4	-2	-4	-1	0	0	-2	-5	-3	-3	-2	-3	-1	0	-5	-2	1	-4
2	0.018750	0.017789	0.015529	0.014620	0.016663	0.019910	0.026292	0.039091	0.046711	0.051118	0.053535	0.053154	0.043097	0.037630	0.034363	0.034634	0.035330	0.049566	0.065030	0.075418	0.089569	-2	-5	-6	-6	2	-5	-6	-6	-6	2	5	-5	3	-2	-6	-4	-2	0	-4	2	-2	-6	-6	-6	-1	-5	-6	-6
2	0.026292	0.039091	0.046711	0.051118	0.053535	0.053154	0.043097	0.037630	0.034363	0.034634	0.035330	0.049566	0.065030	0.075418	0.089569	0.103912	0.102637	0.107127	0.119952	0.139766	0.165715	0	-4	-3	-4	-4	-3	-4	-4	-4	0	-4	-4	-4	-5	-4	6	4	-6	-5	1	4	-3	-3	-4	-5	7	-2	-4
2	0.043097	0.037630	0.034363	0.034634	0.035330	0.049566	0.065030	0.075418	0.089569	0.103912	0.102637	0.107127	0.119952	0.139766	0.165715	0.218771	0.268030	0.308262	0.327551	0.341007	0.325813	0	2	0	-2	-5	0	3	-3	-3	-2	-3	4	-4	-5	-2	-1	0	-6	-5	1	0	2	6	-2	-4	0	-3	0
2	0.165715	0.218771	0.268030	0.308262	0.327551	0.341007	0.325813	0.296568	0.267684	0.236713	0.197972	0.161387	0.129245	0.104015	0.088002	0.084115	0.094170	0.103852	0.115609	0.125369	0.122699	-1	-1	-1	-1	-2	-2	-2	0	-1	0	2	1	-1	-1	3	-1	-1	-2	-2	-1	0	-1	-1	-1	0	-1	-1	0
2	0.218771	0.268030	0.308262	0.327551	0.341007	0.325813	0.296568	0.267684	0.236713	0.197972	0.161387	0.129245	0.104015	0.088002	0.084115	0.094170	0.103852	0.115609	0.125369	0.122699	0.110956	0	-1	-1	-1	0	-1	-1	0	-1	-1	2	-1	1	1	0	0	0	-1	0	0	0	0	0	1	-1	0	1	0
2	0.236713	0.197972	0.161387	0.129245	0.104015	0.088002	0.084115	0.094170	0.103852	0.115609	0.125369	0.122699	0.110956	0.093625	0.075117	0.060753	0.049267	0.045911	0.043409	0.037998	0.038777	1	-4	-4	-4	-2	-4	-3	-3	-4	0	1	-4	-3	-1	7	-3	-3	2	-2	0	0	0	-1	1	-5	2	5	-3
2	0	0	0.851302	0.802434	0.741644	0.657203	0.545636	0.424513	0.327129	0.253057	0.187996	0.146355	0.129697	0.107586	0.103685	0.103228	0.099628	0.094010	0.096846	0.089214	0.079837	0	0	0	0	0	0	0	0	0	0	0	0	0	0	0	0	0	0	0	0	0	0	0	0	0	0	0	0
2	0.075117	0.060753	0.049267	0.045911	0.043409	0.037998	0.038777	0.039900	0.035479	0.034792	0.035295	0.029025	0.023039	0.019388	0.017428	0.015005	0.014576	0.017136	0.020237	0.023438	0.029358	1	-3	-5	-1	1	-3	-3	-5	1	1	4	-2	0	0	-5	-3	-1	-3	4	-1	-4	-6	-6	-6	-4	-6	-6	-7
2	0.049267	0.045911	0.043409	0.037998	0.038777	0.039900	0.035479	0.034792	0.035295	0.029025	0.023039	0.019388	0.017428	0.015005	0.014576	0.017136	0.020237	0.023438	0.029358	0.035201	0.044695	-3	6	-2	-4	-6	0	-2	-5	1	-6	-5	5	-4	-4	-5	-2	-3	-5	2	-5	-3	-2	-2	-2	0	-2	-3	-1
2	0.124508	0.083431	0.063098	0.057239	0.073471	0.081414	0.088835	0.098229	0.102487	0.095862	0.090655	0.089071	0.086742	0.085217	0.099681	0.130181	0.159918	0.197204	0.226564	0.233017	0.251579	1	-1	1	-2	-2	0	-3	-3	1	1	-1	3	2	-2	-2	-1	1	-5	-3	1	-2	-4	-5	-6	4	-4	-5	-4
2	0.126610	0.134420	0.135566	0.123547	0.104212	0.082736	0.060574	0.044259	0.041959	0.043245	0.046178	0.049037	0.054853	0.053193	0.047740	0.042747	0.042746	0.044428	0.054286	0.068961	0.086542	1	0	-1	4	-5	1	3	-3	0	-1	-3	1	-3	-4	-4	0	-1	-5	-4	-2	-2	0	-1	-3	3	1	-1	-3
2	0.043245	0.046178	0.049037	0.054853	0.053193	0.047740	0.042747	0.042746	0.044428	0.054286	0.068961	0.086542	0.107964	0.124094	0.119636	0.114363	0.104551	0.093219	0.075040	0.072356	0.062760	2	-3	-4	-5	2	-4	-4	-2	-3	-1	4	-4	1	0	-3	-2	-1	-4	-4	0	-3	5	-2	-3	-3	-1	-2	-4
2	0.186418	0.148136	0.117703	0.095136	0.077632	0.065522	0.057253	0.058959	0.061916	0.065623	0.066590	0.070962	0.061904	0.065012	0.069297	0.081348	0.089237	0.100231	0.113128	0.119873	0.115135	-3	3	5	3	-2	1	-2	-2	-1	-4	-2	1	0	-4	-3	-1	-3	-4	-2	-4	2	-2	-2	-1	-3	-3	-2	0
2	0.252171	0.289878	0.335880	0.387810	0.452610	0.511344	0.583311	0.643374	0.699781	0.742453	0.772262	0.777473	0.769486	0.753956	0.713193	0.675678	0.637891	0.589840	0.536861	0.520808	0.515690	0	-3	-1	-3	-3	-3	-3	-3	-4	-3	-4	-3	-3	-4	-3	2	7	-5	-4	-2	-4	-4	-1	8	-6	-2	0	-4
2	0.034464	0.032346	0.035884	0.046804	0.073045	0.094214	0.113606	0.135976	0.152481	0.153546	0.151925	0.160432	0.160807	0.156279	0.138940	0.127995	0.107015	0.085044	0.060542	0.045968	0.036871	-4	-3	-2	-4	-6	2	-3	-5	11	-6	-6	-3	-4	-4	-5	-4	-4	-5	-1	-6	-1	-5	-5	-6	2	-5	-4	-6
2	0.120095	0.102905	0.091053	0.100595	0.136042	0.197037	0.280140	0.360662	0.456908	0.513494	0.547913	0.586267	0	0	0	0	0	0	0	0	0	-2	3	-1	2	-3	-1	0	-3	3	-3	1	0	3	1	-2	-2	-3	4	0	-3	5	-1	-3	-3	-3	-3	-3	1
2	0	0	0.893209	0.933766	0.925444	0.923617	0.875920	0.783711	0.663840	0.535701	0.386494	0.268045	0.189261	0.140244	0.103184	0.081834	0.058423	0.045138	0.034464	0.032346	0.035884	0	0	0	0	0	0	0	0	0	0	0	0	0	0	0	0	0	0	0	0	0	0	0	0	0	0	0	0
2	0.239003	0.226110	0.219082	0.196572	0.161583	0.141193	0.110330	0.078916	0.067865	0.061332	0.053698	0.052801	0.067039	0.069052	0.065131	0.061093	0.054287	0.037236	0.033791	0.037550	0.041483	-2	-4	-3	-3	-5	-1	-4	7	-1	-5	-5	-3	-5	-5	-4	-2	-2	-5	-5	-5	-2	0	-2	-3	-3	-4	-4	-5
2	0.199643	0.228507	0.231677	0.246341	0.273818	0.288038	0.262191	0.237576	0.205315	0.182500	0.172165	0.184407	0.212070	0.242080	0.262958	0.262576	0.241231	0.209004	0.173191	0.124226	0.085530	-1	-4	-1	4	-2	-3	-3	-1	-1	-1	3	-4	-1	2	-5	-1	-2	-4	-1	-2	-2	-4	-4	-3	1	-4	-4	-5
2	0.273818	0.288038	0.262191	0.237576	0.205315	0.182500	0.172165	0.184407	0.212070	0.242080	0.262958	0.262576	0.241231	0.209004	0.173191	0.124226	0.085530	0.078395	0.076672	0.076095	0.072773	2	6	1	-3	-3	-2	-2	3	-2	-5	-4	-1	-4	-5	-2	-1	-3	-5	-4	-4	-1	-3	-2	-1	0	0	6	0
2	0.237576	0.205315	0.182500	0.172165	0.184407	0.212070	0.242080	0.262958	0.262576	0.241231	0.209004	0.173191	0.124226	0.085530	0.078395	0.076672	0.076095	0.072773	0.074672	0.068014	0.057755	0	1	3	-2	-3	-2	1	-4	4	-1	-1	0	-2	-4	-4	-2	-2	-5	-3	3	0	-3	-2	-2	1	-1	2	-3
2	0.242080	0.262958	0.262576	0.241231	0.209004	0.173191	0.124226	0.085530	0.078395	0.076672	0.076095	0.072773	0.074672	0.068014	0.057755	0.049869	0.045561	0.043573	0.044019	0.044607	0.048339	1	2	-3	2	-3	2	2	-3	2	0	-2	1	-1	-3	-3	-1	0	-5	-3	-1	-1	1	-1	0	-5	2	2	-3
2	0.076672	0.076095	0.072773	0.074672	0.068014	0.057755	0.049869	0.045561	0.043573	0.044019	0.044607	0.048339	0.054700	0.061229	0.064861	0.068993	0.073860	0.070479	0.061342	0.052772	0.043634	3	-2	-5	-5	1	-4	-5	-4	-5	2	4	-4	-1	-3	-2	-2	-2	-2	-4	0	-3	5	-3	-2	-4	-1	-2	-5
2	0.045561	0.043573	0.044019	0.044607	0.048339	0.054700	0.061229	0.064861	0.068993	0.073860	0.070479	0.061342	0.052772	0.043634	0.031847	0.028215	0.026501	0.024036	0.023100	0.021651	0.018451	-2	-4	-4	-4	3	-4	-4	-5	-4	6	1	-4	0	-3	-4	-4	-2	-4	-3	4	0	-3	-2	-3	-3	-2	-3	-2
2	0	0	0	0	0	0	0	0	0	0.770970	0.684662	0.606864	0.461931	0.321199	0.205895	0.128242	0.072681	0.042846	0.025330	0.015826	0.014784	0	0	0	0	0	0	0	0	0	0	0	0	0	0	0	0	0	0	0	0	0	0	0	0	0	0	0	0
2	0.012945	0.023853	0.046750	0.071461	0.094574	0.125109	0.144419	0.157253	0.166356	0.171880	0.157920	0.163473	0.154850	0.143428	0.137792	0.144859	0.135276	0.123525	0.115473	0.113124	0.101465	-1	-3	-4	-4	-1	-2	-4	-5	1	1	3	-4	2	2	-5	0	2	-4	2	-1	-4	-3	-6	-6	-4	-5	-6	-6
2	0.166356	0.171880	0.157920	0.163473	0.154850	0.143428	0.137792	0.144859	0.135276	0.123525	0.115473	0.113124	0.101465	0.093076	0.092811	0.102744	0.100087	0.111502	0.115824	0.122246	0.110886	0	-1	1	1	-1	0	1	3	-2	0	-2	0	-2	-3	-4	0	0	-4	-2	1	-1	0	0	2	0	-1	-1	3
2	0.154850	0.143428	0.137792	0.144859	0.135276	0.123525	0.115473	0.113124	0.101465	0.093076	0.092811	0.102744	0.100087	0.111502	0.115824	0.122246	0.110886	0.100488	0.080808	0.064919	0.051470	-4	3	6	3	-2	0	-1	-1	-1	-5	-5	1	-1	-5	-4	-1	-3	-5	-4	-4	-1	-3	-3	-3	-3	-3	-1	1
2	0.123525	0.115473	0.113124	0.101465	0.093076	0.092811	0.102744	0.100087	0.111502	0.115824	0.122246	0.110886	0.100488	0.080808	0.064919	0.051470	0.045106	0.043747	0.042006	0.049254	0.056734	-3	-4	-5	-5	8	-4	-5	-5	-4	-1	-2	-4	7	-3	-4	-4	-3	-4	-4	3	-2	0	6	-2	-4	-2	-3	-3
2	0.080808	0.064919	0.051470	0.045106	0.043747	0.042006	0.049254	0.056734	0.067608	0.081314	0.090015	0.098382	0.098435	0.099357	0.095183	0.097890	0.098277	0.116217	0.135561	0.175944	0.238356	-4	-5	-6	-6	1	-5	-5	-6	0	2	6	-5	1	-3	-5	-5	-2	-5	-4	0	-3	4	-1	-5	1	-1	-4	-5
2	0.098435	0.099357	0.095183	0.097890	0.098277	0.116217	0.135561	0.175944	0.238356	0.286979	0.320832	0.355015	0.342426	0.316028	0.301242	0.285564	0.267273	0.257970	0.238869	0.234123	0.215946	-4	-5	-5	-5	1	-5	-5	-5	-4	4	-1	-5	3	7	-5	-2	-4	-3	0	0	-2	-3	-3	-3	-3	-3	-3	-3
2	0.097890	0.098277	0.116217	0.135561	0.175944	0.238356	0.286979	0.320832	0.355015	0.342426	0.316028	0.301242	0.285564	0.267273	0.257970	0.238869	0.234123	0.215946	0.192593	0.184721	0.164657	-2	-3	-1	-3	-3	-3	-3	-4	-4	-3	-4	-3	-3	-5	-3	3	7	-5	-4	-3	-4	-4	-1	8	-6	-3	-1	-2
2	0.088999	0.074356	0.062606	0.054849	0.053657	0.064121	0.076472	0.089286	0.106009	0.129884	0.155172	0.195909	0.243935	0.257587	0.274417	0.273510	0.249993	0.229501	0.191224	0.140151	0.096358	1	-4	1	-4	0	-2	-2	-3	2	0	-2	-3	3	1	-4	0	4	-4	2	0	5	-4	-4	-4	-1	-3	-4	-1
2	0.155172	0.195909	0.243935	0.257587	0.274417	0.273510	0.249993	0.229501	0.191224	0.140151	0.096358	0.064581	0.048445	0.038855	0.036577	0.041972	0.049055	0.053050	0.060426	0.075818	0.093193	-2	-2	-1	3	-5	-2	5	-3	0	-2	-4	0	-4	-5	-3	-2	-2	-6	-3	3	-1	2	-1	0	-3	2	4	1
2	0.191224	0.140151	0.096358	0.064581	0.048445	0.038855	0.036577	0.041972	0.049055	0.053050	0.060426	0.075818	0.093193	0.110112	0.126577	0.150206	0.177165	0.223500	0.280211	0.323746	0.360837	-2	-5	-6	-6	-4	-3	-5	-6	-5	1	5	-5	3	2	-5	-5	-4	-4	-3	0	-1	-1	-3	-2	-4	1	4	-5
2	0.038855	0.036577	0.041972	0.049055	0.053050	0.060426	0.075818	0.093193	0.110112	0.126577	0.150206	0.177165	0.223500	0.280211	0.323746	0.360837	0.388273	0.395853	0.384318	0.360033	0.364445	0	-4	-1	-3	3	-3	-3	-2	-1	-4	-5	-3	-4	-5	-4	6	3	-2	-1	-3	-2	1	-2	0	1	-2	0	-2
2	0.041972	0.049055	0.053050	0.060426	0.075818	0.093193	0.110112	0.126577	0.150206	0.177165	0.223500	0.280211	0.323746	0.360837	0.388273	0.395853	0.384318	0.360033	0.364445	0.340230	0.321879	0	1	7	-2	-5	-2	-2	-2	2	-4	-5	1	-4	2	-5	-2	-3	-5	0	-4	1	-5	-4	-4	-5	-4	-4	4
2	0.060426	0.075818	0.093193	0.110112	0.126577	0.150206	0.177165	0.223500	0.280211	0.323746	0.360837	0.388273	0.395853	0.384318	0.360033	0.364445	0.340230	0.321879	0.335226	0.355389	0.386191	0	4	0	2	-1	1	2	-3	-2	-5	-5	3	-4	-4	-4	-2	-2	-6	-5	-5	-2	-2	-3	-6	-2	-5	-5	-6
2	0.223500	0.280211	0.323746	0.360837	0.388273	0.395853	0.384318	0.360033	0.364445	0.340230	0.321879	0.335226	0.355389	0.386191	0.427436	0.471016	0.490416	0.507363	0.470128	0.421878	0.365201	-1	-1	5	-2	-5	1	0	2	-2	-4	-4	2	-4	-3	2	-1	-2	-5	-5	-3	2	-1	0	0	-3	0	2	-2
2	0.335226	0.355389	0.386191	0.427436	0.471016	0.490416	0.507363	0.470128	0.421878	0.365201	0.344017	0.306910	0.255709	0.221787	0.189748	0.147214	0.108391	0.086528	0.068959	0.057375	0.044840	0	-1	-2	0	-3	-1	4	0	-3	-4	-3	1	-3	-5	4	1	1	-2	-3	-4	-1	-3	-1	-3	-3	1	1	-3
2	0.189748	0.147214	0.108391	0.086528	0.068959	0.057375	0.044840	0.048129	0.088574	0.147484	0.221096	0.312858	0.420862	0.494503	0.559851	0.632362	0	0	0	0	0	-3	-4	4	-4	-4	-4	-4	-4	-4	3	1	-4	-1	-1	-4	-3	-3	5	-3	4	-1	-4	-3	-5	-4	-3	-4	-5
2	0.068959	0.057375	0.044840	0.048129	0.088574	0.147484	0.221096	0.312858	0.420862	0.494503	0.559851	0.632362	0	0	0	0	0	0	0	0	0	-1	3	-2	1	-3	-2	0	-3	3	-1	2	0	3	1	-4	-3	-3	4	0	-3	5	-1	-3	-3	-3	-2	-2	1
2	0	0	0	0	0	0	0	0.770970	0.684662	0.606864	0.461931	0.321199	0.205895	0.128242	0.072681	0.042846	0.025330	0.015826	0.014784	0.016791	0.025374	0	0	0	0	0	0	0	0	0	0	0	0	0	0	0	0	0	0	0	0	0	0	0	0	0	0	0	0
2	0.008885	0.010896	0.012549	0.018617	0.028846	0.041400	0.051584	0.066739	0.085584	0.094105	0.096410	0.098897	0.100474	0.095434	0.096467	0.117726	0.135617	0.159973	0.166618	0.171732	0.165058	-2	2	4	-1	-5	-1	-2	-4	-2	0	-2	3	-2	-2	-5	0	0	-6	-4	2	-4	-4	-3	-2	-6	-3	-3	-5
2	0.018617	0.028846	0.041400	0.051584	0.066739	0.085584	0.094105	0.096410	0.098897	0.100474	0.095434	0.096467	0.117726	0.135617	0.159973	0.166618	0.171732	0.165058	0.153452	0.122746	0.104752	-1	-5	-1	-5	-2	-5	-3	-5	-5	4	0	-5	0	-4	3	-4	0	-6	-4	5	-1	-2	-2	5	1	-3	-2	-4
2	0.085584	0.094105	0.096410	0.098897	0.100474	0.095434	0.096467	0.117726	0.135617	0.159973	0.166618	0.171732	0.165058	0.153452	0.122746	0.104752	0.086371	0.064222	0.048355	0.038940	0.035693	1	0	-2	0	-4	3	1	-1	1	0	-1	0	2	-3	-3	-1	1	-5	-4	0	4	-4	-3	-5	-1	-4	-4	-3
2	0.098897	0.100474	0.095434	0.096467	0.117726	0.135617	0.159973	0.166618	0.171732	0.165058	0.153452	0.122746	0.104752	0.086371	0.064222	0.048355	0.038940	0.035693	0.033673	0.031057	0.035423	3	-1	1	1	-4	0	2	-2	-1	-3	-3	0	-4	-1	-1	0	-1	2	1	-3	-3	-3	-4	-5	-2	0	-2	-4
2	0.086371	0.064222	0.048355	0.038940	0.035693	0.033673	0.031057	0.035423	0.046572	0.092833	0.159157	0.233618	0.328858	0.417256	0.464474	0.484352	0.489099	0.466496	0.420656	0.377373	0.335522	-1	3	3	2	-3	1	0	0	3	-3	-4	1	-2	-4	-3	0	0	-5	-3	-3	-3	-3	-5	-5	-1	-2	-4	-3
2	0.033673	0.031057	0.035423	0.046572	0.092833	0.159157	0.233618	0.328858	0.417256	0.464474	0.484352	0.489099	0.466496	0.420656	0.377373	0.335522	0.284738	0.219360	0.171209	0.121773	0.079999	0	0	-3	-5	-3	-1	-3	2	-1	1	-1	-2	8	-1	-3	-3	-3	-4	-4	0	2	-2	-2	-3	-1	-4	-4	-1
2	0.233618	0.328858	0.417256	0.464474	0.484352	0.489099	0.466496	0.420656	0.377373	0.335522	0.284738	0.219360	0.171209	0.121773	0.079999	0.051333	0.040279	0.030735	0.027091	0.025597	0.025589	1	-3	2	4	-3	-1	2	1	-2	-2	-3	-2	-2	-5	0	0	-2	-5	-5	-4	0	-2	1	-2	-1	-1	-2	-2
2	0.040576	0.066124	0.090814	0.108702	0.129450	0.132140	0.117731	0.102053	0.086663	0.064585	0.044081	0.033780	0.025105	0.020572	0.017001	0.018796	0.019448	0.021458	0.023945	0.029677	0.030751	3	-4	-5	-5	-3	-4	-5	-4	-5	2	4	-4	0	-1	-4	-4	-4	-5	-4	1	1	1	-1	3	-4	2	4	-4
2	0.049667	0.057154	0.086216	0.103482	0.124701	0.144441	0.150948	0.133032	0.122164	0.113082	0.101082	0.086243	0.088343	0.087749	0.093594	0.109925	0.132875	0.138864	0.142000	0.129977	0.106943	-2	-3	5	-3	-3	-3	-3	4	6	-6	-6	-3	-5	-5	-5	1	-1	-6	-4	-6	-4	8	-3	-5	-6	-2	-3	-4
2	0.093594	0.109925	0.132875	0.138864	0.142000	0.129977	0.106943	0.083527	0.066261	0.051708	0.038669	0.029158	0.021453	0.016915	0.014826	0.014086	0.015493	0.021337	0.030073	0.042556	0.067198	2	1	-1	1	-4	4	3	-2	0	-3	-3	2	-2	-5	-3	-1	0	-5	-2	-2	1	5	-2	-2	-3	2	1	-3
2	0.141138	0.098246	0.064931	0.049156	0.037304	0.024347	0.015729	0.011539	0.008775	0.008093	0.007056	0.006649	0.007475	0.010404	0.014491	0.023459	0.032859	0.043348	0.056860	0.079604	0.082923	-1	-1	1	2	-5	0	0	4	0	-5	-5	0	-5	-4	3	0	-3	-6	-5	-5	-4	-5	-6	-6	-3	-5	-6	-6
2	0.076819	0.065584	0.060989	0.063643	0.063153	0.060314	0.050846	0.046782	0.037660	0.032951	0.026422	0.021048	0.016661	0.011356	0.007260	0.005360	0.004590	0.003924	0.003492	0.003229	0.004252	-2	-6	-6	-6	-4	-5	-6	-6	-6	5	-1	-5	-2	-4	-5	-5	-1	-6	-4	6	-2	-4	-3	-4	-2	-4	-4	6
2	0.027120	0.042413	0.058481	0.065682	0.068436	0.074805	0.070655	0.061580	0.056496	0.050559	0.038230	0.027163	0.018459	0.012877	0.011012	0.009117	0.008476	0.008367	0.007899	0.007346	0.007297	-1	-5	-6	-6	-3	-5	-5	-6	-3	2	3	-5	2	2	-6	-5	-2	2	4	3	1	5	1	-1	-4	3	1	-2
2	0.129676	0.119345	0.096878	0.075157	0.070958	0.069113	0.060047	0.054235	0.045267	0.030710	0.021472	0.018530	0.018036	0.019710	0.032544	0.048907	0.056812	0.058822	0.056773	0.043962	0.027813	1	2	-1	-1	-4	3	1	1	0	-5	-4	3	-3	-6	2	-1	0	-6	-4	-4	0	-1	-4	-4	-3	-2	0	-5
2	0.070655	0.061580	0.056496	0.050559	0.038230	0.027163	0.018459	0.012877	0.011012	0.009117	0.008476	0.008367	0.007899	0.007346	0.007297	0.007976	0.008312	0.008807	0.010378	0.011764	0.013902	3	2	-3	-4	0	-2	-4	-4	4	0	2	0	1	-1	-2	-2	-2	-3	-1	0	3	-4	-4	-3	-4	-3	-3	-2
2	0.012334	0.012988	0.013186	0.014313	0.014081	0.014221	0.013795	0.012614	0.014892	0.025092	0.036689	0.061904	0.106291	0.195006	0.293819	0.424082	0.546852	0.661803	0.713262	0.768211	0	-3	-1	-3	-4	-4	-3	-3	-4	-5	-2	-3	-3	-2	-5	-4	0	7	-5	-4	-2	-4	-6	-3	-6	-3	-5	-6	-6
2	0.140580	0.159235	0.156938	0.151805	0.138805	0.112111	0.090075	0.071240	0.061779	0.052184	0.051109	0.055657	0.062087	0.065613	0.074136	0.084639	0.102813	0.134900	0.168187	0.214313	0.287194	1	-1	-1	-2	-5	0	0	-1	2	0	0	2	0	0	-4	-1	-1	-2	3	0	1	-3	-3	-2	-4	-1	-3	-2
2	0.530476	0.595731	0.639807	0.666015	0.659222	0.654706	0.648917	0.651933	0.608088	0.571213	0.535330	0.485821	0.403685	0.360926	0.311871	0.236885	0.197425	0.174348	0.166638	0.174179	0.216057	0	1	-1	0	3	2	0	1	0	-2	-2	2	-3	-1	2	-1	-1	-5	-1	0	-2	-1	2	1	-5	0	-1	2
2	0.547131	0.600433	0.626345	0.632886	0.633032	0.625210	0.604330	0.586084	0.577058	0.580430	0.580933	0.577301	0.577435	0.530923	0.477146	0.415574	0.337292	0.250848	0.211013	0.166316	0.136297	0	0	0	0	-1	0	0	2	-1	0	-1	-2	-1	-2	-1	0	0	0	-1	2	0	-2	-2	-1	-1	-2	1	0
2	0.632886	0.633032	0.625210	0.604330	0.586084	0.577058	0.580430	0.580933	0.577301	0.577435	0.530923	0.477146	0.415574	0.337292	0.250848	0.211013	0.166316	0.136297	0.122308	0.113219	0.102846	0	0	0	1	-2	1	2	0	-1	-1	-2	0	-2	-3	-2	0	0	-5	-1	1	0	2	3	-3	0	1	-2	-2
2	0.633032	0.625210	0.604330	0.586084	0.577058	0.580430	0.580933	0.577301	0.577435	0.530923	0.477146	0.415574	0.337292	0.250848	0.211013	0.166316	0.136297	0.122308	0.113219	0.102846	0.102455	0	2	3	-3	0	1	-2	-2	1	-1	-1	0	3	-3	1	-1	-1	3	-1	0	-1	-2	1	2	0	-2	-1	4
2	0.586084	0.577058	0.580430	0.580933	0.577301	0.577435	0.530923	0.477146	0.415574	0.337292	0.250848	0.211013	0.166316	0.136297	0.122308	0.113219	0.102846	0.102455	0.115256	0.135266	0.151413	1	0	-1	2	-2	0	3	-1	-2	-2	-3	1	-2	-5	-2	2	1	-5	-3	-3	-2	-1	-3	2	-5	1	1	-3
2	0.580933	0.577301	0.577435	0.530923	0.477146	0.415574	0.337292	0.250848	0.211013	0.166316	0.136297	0.122308	0.113219	0.102846	0.102455	0.115256	0.135266	0.151413	0.177015	0.197634	0.210061	-2	4	-3	0	-6	0	1	-4	1	-1	-2	3	-1	-2	-3	0	0	-5	2	-2	-1	0	0	0	3	1	0	-1
2	0.519739	0.398520	0.303300	0.217013	0.143120	0.095309	0.065055	0.060175	0.065290	0.077806	0.089968	0.121150	0.177395	0.254050	0.332755	0.405721	0.446925	0.467254	0.485566	0.463739	0.457602	3	-2	-3	-2	-3	-1	-1	-2	-4	1	1	0	3	-2	-1	-1	1	-4	-3	0	-1	0	-1	-2	-2	1	1	-2
2	0.121468	0.114012	0.116045	0.133419	0.160193	0.203326	0.238948	0.293431	0.355617	0.413453	0.470312	0.529388	0.569909	0.588777	0.606904	0.594254	0.577780	0.530813	0.468131	0.371470	0.284248	-1	0	-2	0	-2	-2	-1	5	-3	-4	-4	-2	-3	-1	-3	0	1	-4	-1	-3	-1	-1	0	6	-1	-2	2	-3
2	0.065055	0.060175	0.065290	0.077806	0.089968	0.121150	0.177395	0.254050	0.332755	0.405721	0.446925	0.467254	0.485566	0.463739	0.457602	0.431905	0.392228	0.322751	0.241006	0.175300	0.129772	-4	-6	-6	-6	-4	-6	-6	-7	-6	6	3	-6	-1	2	-6	-5	-4	-5	-3	1	-3	4	-3	-4	-4	1	-2	-5
2	0.160058	0.156403	0.135850	0.119464	0.113573	0.137712	0.172624	0.211549	0.251991	0.274801	0.263538	0.239982	0.216503	0.177450	0.151516	0.138655	0.123993	0.106657	0.106563	0.101699	0.099865	-1	-5	-3	-5	2	-3	-5	-4	-2	4	2	-3	2	0	-2	-3	0	-4	-2	4	1	-2	-2	-3	3	0	-1	3
2	0.547789	0.491398	0.427136	0.362647	0.307881	0.270067	0.257197	0.257651	0.263838	0.266700	0.250605	0.238806	0.215941	0.201150	0.195780	0.190715	0.176357	0.170066	0.161135	0.154939	0.138978	0	-3	0	1	-2	-2	-1	0	-2	-3	-2	0	0	-4	6	0	-1	-5	-3	-2	-1	-3	-2	-3	-2	-2	1	-2
2	0.418179	0.420156	0.418876	0.405198	0.388094	0.366669	0.338762	0.312961	0.271919	0.224225	0.168415	0.144110	0.113984	0.084353	0.069144	0.057765	0.044109	0.039456	0.033619	0.031001	0.032108	0	-2	-1	-4	-4	-2	1	-4	-1	0	-1	1	-1	-2	-2	0	3	-5	-1	3	-4	-4	-1	7	-5	-3	-1	-2
2	0.127779	0.138307	0.154163	0.163680	0.191652	0.234824	0.296018	0.395350	0.490837	0.552370	0.572859	0.569511	0.568740	0.596424	0.643224	0.706650	0.816377	0.861245	0.884411	0.917533	0.895850	3	-1	2	-3	-4	-1	-1	-3	-3	-3	-1	-1	2	2	-4	-1	2	-3	3	-1	0	-1	0	2	7	-1	-3	-4
2	0.392228	0.322751	0.241006	0.175300	0.129772	0.085486	0.061948	0.054071	0.058662	0.067272	0.094153	0.146681	0.182125	0.224199	0.262522	0.275457	0.275731	0.311316	0.328625	0.331488	0.346831	-1	1	1	0	-3	1	0	0	-2	2	-1	2	-1	-3	1	-2	0	-4	-3	1	2	1	-2	-3	0	1	-2	-1
2	0.346831	0.373259	0.368337	0.370241	0.359953	0.318698	0.255315	0.191913	0.121031	0.073435	0.050938	0.031083	0.020575	0.015978	0.015484	0.015294	0.015734	0.015497	0.015549	0.015281	0.021871	3	-2	-1	0	-2	-1	0	1	-2	0	-1	-2	-3	-1	2	-1	0	-2	-3	1	0	-1	-1	1	-3	-1	0	0
2	0	0	0	0.787591	0.738202	0.678520	0.627491	0.752310	0.785497	0.824692	0.785129	0.721146	0.628138	0.519739	0.398520	0.303300	0.217013	0.143120	0.095309	0.065055	0.060175	0	0	0	0	0	0	0	0	0	0	0	0	0	0	0	0	0	0	0	0	0	0	0	0	0	0	0	0
2	0.099349	0.121529	0.138300	0.144031	0.155415	0.150844	0.151471	0.171389	0.188896	0.195672	0.209190	0.203053	0.175786	0.143521	0.114483	0.080103	0.065162	0.055541	0.052137	0.044701	0.037445	-2	1	-2	-3	-6	-2	-1	-5	-4	-5	-5	3	-5	-5	7	-3	-2	-6	-5	-3	-1	-4	-1	-1	-3	-1	-3	4
2	0.188896	0.195672	0.209190	0.203053	0.175786	0.143521	0.114483	0.080103	0.065162	0.055541	0.052137	0.044701	0.037445	0.027480	0.017828	0.010055	0.006441	0.003879	0.002625	0.003095	0.007101	-3	-5	-6	-7	-5	-5	-6	-6	-5	2	4	-6	1	4	-6	-5	-2	-2	3	2	1	1	0	4	-6	2	4	-4
2	0.156321	0.197409	0.231670	0.244011	0.248996	0.236299	0.209742	0.180570	0.164626	0.162736	0.164725	0.216847	0.257645	0.265267	0.266815	0.258997	0.206594	0.164564	0.146994	0.120319	0.092981	0	-1	-4	-2	-4	-3	-3	2	-1	0	2	-1	1	1	-2	-2	-1	-4	0	3	-3	-1	0	2	-2	-2	-1	1
2	0.248996	0.236299	0.209742	0.180570	0.164626	0.162736	0.164725	0.216847	0.257645	0.265267	0.266815	0.258997	0.206594	0.164564	0.146994	0.120319	0.092981	0.079422	0.072124	0.060139	0.054073	-3	-1	3	6	-6	-2	-1	-3	-2	-5	-5	-2	-5	-4	1	2	1	-7	-5	-4	0	-3	0	7	-6	-1	0	-4
2	0.180570	0.164626	0.162736	0.164725	0.216847	0.257645	0.265267	0.266815	0.258997	0.206594	0.164564	0.146994	0.120319	0.092981	0.079422	0.072124	0.060139	0.054073	0.051865	0.050537	0.055163	-1	-2	-2	2	-5	3	3	-1	0	-2	-1	-3	0	-2	-4	0	2	-3	-3	-2	-2	-5	-6	-6	-4	-3	-5	-5
2	0.062153	0.068424	0.071209	0.084480	0.099579	0.112813	0.136735	0.176610	0.222380	0.280338	0.309817	0.352957	0.373119	0.375636	0.364783	0.385657	0.367865	0.369571	0.333329	0.277379	0.217498	-3	-4	7	5	-6	-2	-1	-3	-2	-5	-5	-3	-3	-6	-5	-1	-2	-7	-5	-4	0	-4	1	1	-5	0	2	4
2	0.136735	0.176610	0.222380	0.280338	0.309817	0.352957	0.373119	0.375636	0.364783	0.385657	0.367865	0.369571	0.333329	0.277379	0.217498	0.169231	0.097866	0.071705	0.061386	0.061003	0.059916	0	2	-2	-2	-3	1	3	-3	1	-2	-1	0	-1	0	-4	-2	-2	5	3	0	-1	1	1	-3	-1	-2	0	-1
2	0.067066	0.063092	0.061165	0.068189	0.078972	0.084807	0.087695	0.082609	0.066250	0.048076	0.041890	0.042537	0.058332	0.089125	0.116709	0.145185	0.161287	0.181509	0.179152	0.175514	0.165837	0	-3	1	5	-5	-1	1	1	0	-6	-5	-2	-5	-4	-4	2	0	0	-4	-4	-2	1	-2	2	-1	1	0	5
2	0.058180	0.082890	0.116262	0.151618	0.158368	0.181975	0.192200	0.178291	0.151206	0.141447	0.112457	0.085736	0.070402	0.056493	0.043809	0.035129	0.028647	0.026237	0.023057	0.019858	0.016083	3	2	-3	-4	-5	-1	1	1	-3	-2	-4	4	-2	-6	2	0	-2	-6	-5	-3	-1	0	-3	2	-5	1	5	0
2	0.068189	0.078972	0.084807	0.087695	0.082609	0.066250	0.048076	0.041890	0.042537	0.058332	0.089125	0.116709	0.145185	0.161287	0.181509	0.179152	0.175514	0.165837	0.165633	0.174825	0.207404	-1	1	-3	-3	-3	0	0	-1	-2	0	0	-1	-1	4	-5	-2	0	1	4	1	0	3	-1	0	-1	1	2	-5
2	0.019858	0.016083	0.013152	0.010134	0.009349	0.011661	0.017687	0.025149	0.040051	0.059587	0.087460	0.120346	0.170714	0.196578	0.201740	0.194258	0.174109	0.131267	0.098938	0.078535	0.060860	-4	-3	-3	-1	-7	-1	8	-5	-3	-6	-6	-2	-5	-6	-4	-3	-4	-6	-5	-6	-1	-5	-4	-5	-2	-4	-4	-5
2	0.170714	0.196578	0.201740	0.194258	0.174109	0.131267	0.098938	0.078535	0.060860	0.046336	0.038002	0.037911	0.042610	0.044664	0.060266	0.069822	0.087145	0.110316	0.128279	0.137668	0.143568	0	-3	0	5	2	0	2	-3	4	-2	-3	0	-3	-3	-5	-2	-3	-3	-1	-1	-2	-5	-4	-6	2	-4	-5	-6
2	0.038002	0.037911	0.042610	0.044664	0.060266	0.069822	0.087145	0.110316	0.128279	0.137668	0.143568	0.138849	0.144406	0.139255	0.122801	0.112646	0.098046	0.063596	0.046084	0.035594	0.026210	1	1	1	-3	-2	0	-1	-2	-1	-3	1	4	-2	-1	-3	-1	-3	0	2	-1	2	-1	-4	-5	1	-4	-4	-3
2	0.037911	0.042610	0.044664	0.060266	0.069822	0.087145	0.110316	0.128279	0.137668	0.143568	0.138849	0.144406	0.139255	0.122801	0.112646	0.098046	0.063596	0.046084	0.035594	0.026210	0.020599	2	-1	-4	-5	1	-4	-4	-3	3	-1	-2	-4	-1	4	-5	-3	-3	4	6	-2	-2	-1	-4	-5	-3	2	-3	-5
2	0.023867	0.026177	0.024622	0.026447	0.033654	0.041391	0.058569	0.094141	0.147265	0.227347	0.315453	0.414811	0.519081	0.609807	0.671495	0.667700	0.648788	0.579445	0.480943	0.367472	0.302347	-2	-5	-6	-6	-2	-5	-6	-6	-6	5	1	-5	0	0	-5	-4	2	-4	-2	4	4	-5	-4	-4	-1	-4	-4	4
2	0.026447	0.033654	0.041391	0.058569	0.094141	0.147265	0.227347	0.315453	0.414811	0.519081	0.609807	0.671495	0.667700	0.648788	0.579445	0.480943	0.367472	0.302347	0.238048	0.188954	0.153071	-2	-5	-2	8	-6	-3	-1	-2	-3	-6	-7	-4	-6	-7	-5	-3	-4	-7	-6	-6	-5	-3	1	-2	-6	-1	-3	-5
2	0.026366	0.019499	0.012438	0.008119	0.007197	0.007231	0.007968	0.008186	0.010328	0.013419	0.015596	0.017161	0.018116	0.019090	0.028311	0.042966	0.059811	0.068800	0.077340	0.071264	0.058552	-2	-6	-6	-7	-5	-5	-6	-6	-5	1	2	-6	2	7	-6	-5	-4	2	0	2	1	-3	-6	-6	0	-4	-5	-5
2	0.010328	0.013419	0.015596	0.017161	0.018116	0.019090	0.028311	0.042966	0.059811	0.068800	0.077340	0.071264	0.058552	0.042751	0.035769	0.024646	0.018184	0.013489	0.010135	0.006810	0.006266	3	-5	-4	-5	-1	-4	-4	-4	-1	-1	-5	-4	-3	-6	7	-2	-1	-6	-5	-1	7	-4	-3	-5	-2	-2	-3	-3
2	0.157889	0.173948	0.190284	0.191029	0.189260	0.163953	0.126232	0.098449	0.070835	0.055126	0.037607	0.032231	0.028200	0.025053	0.022775	0.023133	0.021262	0.020844	0.019284	0.017486	0.014809	1	4	3	-1	-5	-1	-2	-1	-2	-3	-3	4	-2	-6	-3	-2	-3	-6	-4	-2	1	-5	2	-4	5	-4	-4	1
2	0.190284	0.191029	0.189260	0.163953	0.126232	0.098449	0.070835	0.055126	0.037607	0.032231	0.028200	0.025053	0.022775	0.023133	0.021262	0.020844	0.019284	0.017486	0.014809	0.016578	0.019550	-3	0	-1	5	-4	-1	0	2	-1	-5	-6	3	-4	-6	0	-2	-3	-6	-5	-5	-4	-4	2	-5	-4	-3	-4	-5
2	0.126232	0.098449	0.070835	0.055126	0.037607	0.032231	0.028200	0.025053	0.022775	0.023133	0.021262	0.020844	0.019284	0.017486	0.014809	0.016578	0.019550	0.026727	0.030594	0.045545	0.058165	-5	-5	-6	-6	-5	-5	-6	-6	-1	-4	-2	-5	-3	7	-6	-5	-5	5	7	-4	-1	-3	0	2	-6	-1	6	-5
2	0.025053	0.022775	0.023133	0.021262	0.020844	0.019284	0.017486	0.014809	0.016578	0.019550	0.026727	0.030594	0.045545	0.058165	0.074225	0.089973	0.106069	0.118754	0.134850	0.163923	0.211730	0	-5	-1	-4	0	-3	-5	7	-4	-5	-6	-4	-5	-5	-5	-2	-4	-2	-3	-5	0	2	-3	-4	-3	-1	-2	-3
2	0.106069	0.118754	0.134850	0.163923	0.211730	0.265521	0.323377	0.369528	0.399680	0.409198	0.441296	0.471370	0.549504	0.629838	0.728156	0.786750	0.843791	0.815534	0.825031	0.777444	0	-2	-2	0	1	-4	-3	-1	6	-3	-6	-6	-2	-5	-5	-4	-2	-4	-5	-4	-6	-1	1	1	0	-5	2	4	-1
2	0.163923	0.211730	0.265521	0.323377	0.369528	0.399680	0.409198	0.441296	0.471370	0.549504	0.629838	0.728156	0.786750	0.843791	0.815534	0.825031	0.777444	0	0	0	0	-2	1	0	-2	-2	0	-3	-4	2	1	1	0	0	-1	-4	-2	2	-5	-1	3	2	-3	-2	-1	1	-3	-2	5
2	0.323377	0.369528	0.399680	0.409198	0.441296	0.471370	0.549504	0.629838	0.728156	0.786750	0.843791	0.815534	0.825031	0.777444	0	0	0	0	0	0	0	1	1	-3	-3	-5	0	1	-3	-1	-5	-4	3	-4	-5	6	-1	-1	-6	-4	-4	-1	-2	-2	-3	-4	-3	-4	6
2	0.399680	0.409198	0.441296	0.471370	0.549504	0.629838	0.728156	0.786750	0.843791	0.815534	0.825031	0.777444	0	0	0	0	0	0	0	0	0	0	3	-2	0	-4	1	-2	-2	4	-2	-2	0	0	1	-4	1	1	-1	2	-2	-3	-4	-2	-4	-5	-5	-5	7
2	0	0	0	0	0	0.177397	0.147270	0.128834	0.098625	0.062622	0.051485	0.049881	0.047189	0.044618	0.050485	0.056350	0.060412	0.065746	0.067066	0.063092	0.061165	0	0	0	0	0	0	0	0	0	0	0	0	0	0	0	0	0	0	0	0	0	0	0	0	0	0	0	0
[truncated: 617 more columns]
