# Supplementary material for: Prediction of carbamylated lysine sites based on the one-class k -nearest neighbor method
Source: Royal Society of Chemistry journal article supplement (doi:10.1039/c3mb70195f), 2013-08-13
Supplement: c3mb70195f_2.xlsx [file c3mb70195f_2.xlsx]

## Sheet: Cabamylation_aa_frequency
amino frequency acid aa site	A	R	N	D	C	Q	E	G	H	I	L	K	M	F	P	S	T	W	Y	V	X
1	13.0435	6.52174	4.34783	4.34783	0	6.52174	19.5652	4.34783	4.34783	2.17391	6.52174	10.8696	0	0	0	2.17391	2.17391	0	4.34783	8.69565	0
2	17.3913	4.34783	0	4.34783	2.17391	10.8696	4.34783	13.0435	0	4.34783	8.69565	13.0435	2.17391	2.17391	0	2.17391	2.17391	0	2.17391	6.52174	0
3	13.0435	6.52174	6.52174	6.52174	0	4.34783	8.69565	2.17391	2.17391	6.52174	8.69565	8.69565	0	6.52174	2.17391	2.17391	10.8696	0	0	4.34783	0
4	6.52174	6.52174	0	10.8696	0	0	8.69565	15.2174	0	4.34783	6.52174	13.0435	4.34783	2.17391	6.52174	4.34783	0	2.17391	8.69565	0	0
5	17.3913	2.17391	4.34783	8.69565	0	2.17391	6.52174	8.69565	4.34783	6.52174	10.8696	2.17391	0	0	2.17391	4.34783	8.69565	0	8.69565	2.17391	0
6	4.34783	8.69565	0	2.17391	0	0	2.17391	39.1304	8.69565	4.34783	2.17391	8.69565	0	2.17391	13.0435	0	0	2.17391	0	2.17391	0
7	32.6087	6.52174	2.17391	2.17391	0	0	0	4.34783	2.17391	19.5652	4.34783	0	0	6.52174	2.17391	0	0	0	2.17391	15.2174	0
8	2.17391	0	4.34783	15.2174	0	2.17391	2.17391	15.2174	0	10.8696	2.17391	0	0	4.34783	2.17391	17.3913	6.52174	2.17391	2.17391	10.8696	0
9	6.52174	2.17391	0	0	2.17391	4.34783	0	23.913	2.17391	4.34783	4.34783	0	0	10.8696	0	13.0435	15.2174	2.17391	2.17391	6.52174	0
10	4.34783	0	0	0	0	2.17391	0	2.17391	0	21.7391	15.2174	0	2.17391	28.2609	2.17391	0	2.17391	0	2.17391	17.3913	0
11	0	0	0	0	0	0	0	0	0	0	0	100	0	0	0	0	0	0	0	0	0
12	6.52174	0	4.34783	13.0435	4.34783	0	4.34783	0	2.17391	26.087	15.2174	0	4.34783	2.17391	0	4.34783	0	2.17391	0	10.8696	0
13	15.2174	6.52174	0	17.3913	2.17391	0	0	4.34783	8.69565	2.17391	4.34783	0	6.52174	17.3913	6.52174	0	0	0	6.52174	2.17391	0
14	13.0435	0	6.52174	0	0	0	21.7391	2.17391	2.17391	2.17391	15.2174	0	15.2174	0	4.34783	6.52174	8.69565	0	0	2.17391	0
15	26.087	0	6.52174	10.8696	2.17391	0	0	15.2174	0	2.17391	2.17391	0	0	2.17391	4.34783	17.3913	8.69565	0	2.17391	0	0
16	2.17391	4.34783	2.17391	2.17391	0	4.34783	2.17391	10.8696	2.17391	4.34783	19.5652	2.17391	4.34783	0	0	8.69565	0	6.52174	19.5652	4.34783	0
17	4.34783	4.34783	6.52174	2.17391	0	2.17391	2.17391	19.5652	4.34783	8.69565	6.52174	13.0435	2.17391	6.52174	4.34783	6.52174	4.34783	0	0	2.17391	0
18	17.3913	8.69565	8.69565	6.52174	0	2.17391	0	17.3913	2.17391	2.17391	2.17391	4.34783	2.17391	2.17391	0	6.52174	8.69565	0	0	8.69565	0
19	2.17391	0	2.17391	0	0	8.69565	2.17391	6.52174	2.17391	13.0435	13.0435	2.17391	2.17391	6.52174	10.8696	6.52174	17.3913	0	0	4.34783	0
20	6.52174	0	8.69565	13.0435	2.17391	2.17391	6.52174	10.8696	0	0	6.52174	2.17391	0	6.52174	15.2174	2.17391	10.8696	4.34783	0	2.17391	0
21	15.2174	8.69565	2.17391	4.34783	2.17391	2.17391	4.34783	4.34783	2.17391	2.17391	8.69565	4.34783	10.8696	10.8696	4.34783	8.69565	2.17391	0	2.17391	0	0
