# Supplementary material for: Prediction of carbamylated lysine sites based on the one-class k -nearest neighbor method
Source: Royal Society of Chemistry journal article supplement (doi:10.1039/c3mb70195f), 2013-08-13
Supplement: c3mb70195f_3.xlsx [file c3mb70195f_3.xlsx]

## Sheet: 工作表1
You have specified parameters: threshold=mu+/-1.00*sigma #fea=666 selection method=MID #maxVar=666 #maxSample=1083
Target classification variable (#1 column in the input data) has name=class entropy score=0.228
Feature name: For pssm, from 1 to 20 represented 20 different amino acids (A R N D C Q E G H I L K M F P S T W Y V). For ss, 1 means “Helix”, 2 means “Strand” and 3 means “other”. For sa, 1 means “Buried” and 2 means “Exposed”.
*** MaxRel features ***
Order	Fea	Name	Score
1	217	AA10_pssm_16	0.045
2	146	AA7_pssm_5	0.040
3	470	AA10_ss_2	0.038
4	233	AA11_pssm_12	0.037
5	473	AA11_ss_2	0.035
6	656	AA10_aa_frequency	0.035
7	251	AA12_pssm_10	0.034
8	213	AA10_pssm_12	0.032
9	526	AA11_sa_2	0.031
10	525	AA11_sa_1	0.031
11	573	AA6_Electrostatic charge	0.030
12	467	AA9_ss_2	0.029
13	652	AA6_aa_frequency	0.028
14	317	AA15_pssm_16	0.028
15	141	AA6_pssm_20	0.027
16	261	AA12_pssm_20	0.027
17	576	AA6_Secondary structure	0.026
18	237	AA11_pssm_16	0.026
19	208	AA10_pssm_7	0.025
20	654	AA8_aa_frequency	0.025
21	517	AA7_sa_1	0.024
22	203	AA10_pssm_2	0.024
23	518	AA7_sa_2	0.023
24	205	AA10_pssm_4	0.022
25	132	AA6_pssm_11	0.022
26	459	AA6_ss_3	0.022
27	211	AA10_pssm_10	0.021
28	209	AA10_pssm_8	0.021
29	28	AA1_pssm_7	0.021
30	221	AA10_pssm_20	0.021
31	129	AA6_pssm_8	0.021
32	204	AA10_pssm_3	0.021
33	615	AA15_Polarity	0.021
34	474	AA11_ss_3	0.020
35	653	AA7_aa_frequency	0.020
36	659	AA14_aa_frequency	0.020
37	216	AA10_pssm_15	0.020
38	595	AA10_Polarity	0.020
39	471	AA10_ss_3	0.019
40	593	AA10_Electrostatic charge	0.018
41	650	AA4_aa_frequency	0.018
42	577	AA7_Codon diversity	0.018
43	369	AA18_pssm_8	0.018
44	140	AA6_pssm_19	0.017
45	131	AA6_pssm_10	0.017
46	476	AA12_ss_2	0.017
47	665	AA20_aa_frequency	0.017
48	223	AA11_pssm_2	0.016
49	142	AA7_pssm_1	0.016
50	143	AA7_pssm_2	0.016
51	215	AA10_pssm_14	0.016
52	202	AA10_pssm_1	0.016
53	611	AA14_Secondary structure	0.016
54	134	AA6_pssm_13	0.016
55	224	AA11_pssm_3	0.015
56	294	AA14_pssm_13	0.015
57	531	AA14_sa_1	0.015
58	25	AA1_pssm_4	0.015
59	663	AA18_aa_frequency	0.015
60	658	AA13_aa_frequency	0.015
61	532	AA14_sa_2	0.015
62	596	AA10_Secondary structure	0.014
63	664	AA19_aa_frequency	0.014
64	275	AA13_pssm_14	0.014
65	647	AA1_aa_frequency	0.014
66	344	AA17_pssm_3	0.014
67	405	AA20_pssm_4	0.014
68	212	AA10_pssm_11	0.014
69	47	AA2_pssm_6	0.014
70	648	AA2_aa_frequency	0.014
71	207	AA10_pssm_6	0.014
72	220	AA10_pssm_19	0.014
73	148	AA7_pssm_7	0.014
74	586	AA8_Secondary structure	0.013
75	135	AA6_pssm_14	0.013
76	189	AA9_pssm_8	0.013
77	303	AA15_pssm_2	0.013
78	309	AA15_pssm_8	0.013
79	661	AA16_aa_frequency	0.013
80	524	AA10_sa_2	0.013
81	523	AA10_sa_1	0.013
82	238	AA11_pssm_17	0.013
83	666	AA21_aa_frequency	0.013
84	272	AA13_pssm_11	0.013
85	660	AA15_aa_frequency	0.013
86	506	AA1_sa_2	0.013
87	246	AA12_pssm_5	0.013
88	222	AA11_pssm_1	0.013
89	574	AA6_Molecular volume	0.012
90	280	AA13_pssm_19	0.012
91	231	AA11_pssm_10	0.012
92	479	AA13_ss_2	0.012
93	600	AA12_Polarity	0.012
94	500	AA20_ss_2	0.012
95	367	AA18_pssm_6	0.012
96	318	AA15_pssm_17	0.012
97	527	AA12_sa_1	0.012
98	442	AA1_ss_1	0.012
99	598	AA12_Electrostatic charge	0.012
100	293	AA14_pssm_12	0.012
101	340	AA16_pssm_19	0.012
102	254	AA12_pssm_13	0.012
103	528	AA12_sa_2	0.012
104	583	AA8_Electrostatic charge	0.012
105	184	AA9_pssm_3	0.012
106	302	AA15_pssm_1	0.011
107	584	AA8_Molecular volume	0.011
108	183	AA9_pssm_2	0.011
109	283	AA14_pssm_2	0.011
110	101	AA4_pssm_20	0.011
111	457	AA6_ss_1	0.011
112	173	AA8_pssm_12	0.011
113	5	AA5_disorder	0.011
114	411	AA20_pssm_10	0.011
115	7	AA7_disorder	0.011
116	380	AA18_pssm_19	0.011
117	278	AA13_pssm_17	0.011
118	236	AA11_pssm_15	0.011
119	210	AA10_pssm_9	0.011
120	655	AA9_aa_frequency	0.011
121	308	AA15_pssm_7	0.011
122	312	AA15_pssm_11	0.011
123	410	AA20_pssm_9	0.011
124	446	AA2_ss_2	0.011
125	27	AA1_pssm_6	0.011
126	456	AA5_ss_3	0.011
127	505	AA1_sa_1	0.010
128	416	AA20_pssm_15	0.010
129	443	AA1_ss_2	0.010
130	635	AA19_Polarity	0.010
131	521	AA9_sa_1	0.010
132	273	AA13_pssm_12	0.010
133	413	AA20_pssm_12	0.010
134	4	AA4_disorder	0.010
135	102	AA5_pssm_1	0.010
136	617	AA16_Codon diversity	0.010
137	492	AA17_ss_3	0.010
138	522	AA9_sa_2	0.010
139	657	AA12_aa_frequency	0.010
140	295	AA14_pssm_14	0.010
141	468	AA9_ss_3	0.009
142	649	AA3_aa_frequency	0.009
143	241	AA11_pssm_20	0.009
144	422	AA21_pssm_1	0.009
145	3	AA3_disorder	0.009
146	10	AA10_disorder	0.009
147	161	AA7_pssm_20	0.009
148	651	AA5_aa_frequency	0.009
149	6	AA6_disorder	0.009
150	113	AA5_pssm_12	0.009
151	139	AA6_pssm_18	0.009
152	585	AA8_Polarity	0.009
153	180	AA8_pssm_19	0.009
154	495	AA18_ss_3	0.009
155	662	AA17_aa_frequency	0.009
156	267	AA13_pssm_6	0.009
157	306	AA15_pssm_5	0.008
158	491	AA17_ss_2	0.008
159	153	AA7_pssm_12	0.008
160	55	AA2_pssm_14	0.008
161	11	AA11_disorder	0.008
162	406	AA20_pssm_5	0.008
163	83	AA4_pssm_2	0.008
164	392	AA19_pssm_11	0.008
165	349	AA17_pssm_8	0.008
166	60	AA2_pssm_19	0.008
167	299	AA14_pssm_18	0.008
168	301	AA14_pssm_20	0.008
169	188	AA9_pssm_7	0.008
170	226	AA11_pssm_5	0.008
171	590	AA9_Polarity	0.008
172	110	AA5_pssm_9	0.008
173	63	AA3_pssm_2	0.008
174	104	AA5_pssm_3	0.008
175	86	AA4_pssm_5	0.008
176	394	AA19_pssm_13	0.008
177	480	AA13_ss_3	0.008
178	243	AA12_pssm_2	0.008
179	151	AA7_pssm_10	0.008
180	116	AA5_pssm_15	0.008
181	166	AA8_pssm_5	0.008
182	1	AA1_disorder	0.008
183	44	AA2_pssm_3	0.008
184	313	AA15_pssm_12	0.008
185	147	AA7_pssm_6	0.008
186	158	AA7_pssm_17	0.008
187	2	AA2_disorder	0.008
188	230	AA11_pssm_9	0.008
189	214	AA10_pssm_13	0.008
190	551	AA1_Secondary structure	0.007
191	320	AA15_pssm_19	0.007
192	321	AA15_pssm_20	0.007
193	396	AA19_pssm_15	0.007
194	616	AA15_Secondary structure	0.007
195	192	AA9_pssm_11	0.007
196	157	AA7_pssm_16	0.007
197	386	AA19_pssm_5	0.007
198	195	AA9_pssm_14	0.007
199	185	AA9_pssm_4	0.007
200	572	AA6_Codon diversity	0.007
201	503	AA21_ss_2	0.007
202	429	AA21_pssm_8	0.007
203	50	AA2_pssm_9	0.007
204	23	AA1_pssm_2	0.007
205	307	AA15_pssm_6	0.007
206	262	AA13_pssm_1	0.007
207	382	AA19_pssm_1	0.007
208	150	AA7_pssm_9	0.007
209	247	AA12_pssm_6	0.007
210	519	AA8_sa_1	0.007
211	8	AA8_disorder	0.007
212	18	AA18_disorder	0.007
213	182	AA9_pssm_1	0.007
214	477	AA12_ss_3	0.007
215	357	AA17_pssm_16	0.007
216	277	AA13_pssm_16	0.007
217	19	AA19_disorder	0.007
218	578	AA7_Electrostatic charge	0.007
219	107	AA5_pssm_6	0.007
220	327	AA16_pssm_6	0.007
221	608	AA14_Electrostatic charge	0.007
222	105	AA5_pssm_4	0.007
223	232	AA11_pssm_11	0.007
224	580	AA7_Polarity	0.007
225	127	AA6_pssm_6	0.006
226	348	AA17_pssm_7	0.006
227	227	AA11_pssm_6	0.006
228	174	AA8_pssm_13	0.006
229	291	AA14_pssm_10	0.006
230	550	AA1_Polarity	0.006
231	20	AA20_disorder	0.006
232	501	AA20_ss_3	0.006
233	591	AA9_Secondary structure	0.006
234	12	AA12_disorder	0.006
235	345	AA17_pssm_4	0.006
236	455	AA5_ss_2	0.006
237	520	AA8_sa_2	0.006
238	109	AA5_pssm_8	0.006
239	449	AA3_ss_2	0.006
240	48	AA2_pssm_7	0.006
241	240	AA11_pssm_19	0.006
242	155	AA7_pssm_14	0.006
243	599	AA12_Molecular volume	0.006
244	253	AA12_pssm_12	0.006
245	98	AA4_pssm_17	0.006
246	21	AA21_disorder	0.006
247	225	AA11_pssm_4	0.006
248	594	AA10_Molecular volume	0.006
249	37	AA1_pssm_16	0.006
250	122	AA6_pssm_1	0.006
251	358	AA17_pssm_17	0.006
252	42	AA2_pssm_1	0.006
253	159	AA7_pssm_18	0.006
254	298	AA14_pssm_17	0.006
255	145	AA7_pssm_4	0.006
256	460	AA7_ss_1	0.006
257	85	AA4_pssm_4	0.006
258	581	AA7_Secondary structure	0.006
259	314	AA15_pssm_13	0.006
260	87	AA4_pssm_6	0.006
261	292	AA14_pssm_11	0.006
262	393	AA19_pssm_12	0.006
263	193	AA9_pssm_12	0.006
264	69	AA3_pssm_8	0.006
265	529	AA13_sa_1	0.006
266	335	AA16_pssm_14	0.006
267	168	AA8_pssm_7	0.005
268	296	AA14_pssm_15	0.005
269	563	AA4_Electrostatic charge	0.005
270	137	AA6_pssm_16	0.005
271	24	AA1_pssm_3	0.005
272	115	AA5_pssm_14	0.005
273	530	AA13_sa_2	0.005
274	126	AA6_pssm_5	0.005
275	636	AA19_Secondary structure	0.005
276	300	AA14_pssm_19	0.005
277	622	AA17_Codon diversity	0.005
278	423	AA21_pssm_2	0.005
279	235	AA11_pssm_14	0.005
280	626	AA17_Secondary structure	0.005
281	428	AA21_pssm_7	0.005
282	350	AA17_pssm_9	0.005
283	432	AA21_pssm_11	0.005
284	108	AA5_pssm_7	0.005
285	52	AA2_pssm_11	0.005
286	91	AA4_pssm_10	0.005
287	177	AA8_pssm_16	0.005
288	13	AA13_disorder	0.005
289	504	AA21_ss_3	0.005
290	239	AA11_pssm_18	0.005
291	575	AA6_Polarity	0.005
292	553	AA2_Electrostatic charge	0.005
293	431	AA21_pssm_10	0.005
294	462	AA7_ss_3	0.005
295	78	AA3_pssm_17	0.005
296	347	AA17_pssm_6	0.005
297	381	AA18_pssm_20	0.005
298	68	AA3_pssm_7	0.005
299	82	AA4_pssm_1	0.005
300	315	AA15_pssm_14	0.005
301	249	AA12_pssm_8	0.005
302	371	AA18_pssm_10	0.005
303	118	AA5_pssm_17	0.005
304	179	AA8_pssm_18	0.005
305	279	AA13_pssm_18	0.005
306	374	AA18_pssm_13	0.005
307	579	AA7_Molecular volume	0.005
308	385	AA19_pssm_4	0.005
309	258	AA12_pssm_17	0.005
310	90	AA4_pssm_9	0.005
311	259	AA12_pssm_18	0.005
312	609	AA14_Molecular volume	0.004
313	14	AA14_disorder	0.004
314	71	AA3_pssm_10	0.004
315	383	AA19_pssm_2	0.004
316	538	AA17_sa_2	0.004
317	41	AA1_pssm_20	0.004
318	421	AA20_pssm_20	0.004
319	354	AA17_pssm_13	0.004
320	364	AA18_pssm_3	0.004
321	33	AA1_pssm_12	0.004
322	65	AA3_pssm_4	0.004
323	123	AA6_pssm_2	0.004
324	103	AA5_pssm_2	0.004
325	323	AA16_pssm_2	0.004
326	56	AA2_pssm_15	0.004
327	133	AA6_pssm_12	0.004
328	430	AA21_pssm_9	0.004
329	403	AA20_pssm_2	0.004
330	149	AA7_pssm_8	0.004
331	117	AA5_pssm_16	0.004
332	40	AA1_pssm_19	0.004
333	361	AA17_pssm_20	0.004
334	370	AA18_pssm_9	0.004
335	613	AA15_Electrostatic charge	0.004
336	72	AA3_pssm_11	0.004
337	305	AA15_pssm_4	0.004
338	614	AA15_Molecular volume	0.004
339	445	AA2_ss_1	0.004
340	53	AA2_pssm_12	0.004
341	9	AA9_disorder	0.004
342	260	AA12_pssm_19	0.004
343	144	AA7_pssm_3	0.004
344	198	AA9_pssm_17	0.004
345	26	AA1_pssm_5	0.004
346	565	AA4_Polarity	0.004
347	458	AA6_ss_2	0.004
348	181	AA8_pssm_20	0.004
349	498	AA19_ss_3	0.004
350	333	AA16_pssm_12	0.004
351	125	AA6_pssm_4	0.004
352	395	AA19_pssm_14	0.004
353	304	AA15_pssm_3	0.004
354	441	AA21_pssm_20	0.004
355	372	AA18_pssm_11	0.004
356	566	AA4_Secondary structure	0.004
357	35	AA1_pssm_14	0.004
358	582	AA8_Codon diversity	0.004
359	219	AA10_pssm_18	0.004
360	30	AA1_pssm_9	0.004
361	601	AA12_Secondary structure	0.004
362	391	AA19_pssm_10	0.004
363	324	AA16_pssm_3	0.004
364	537	AA17_sa_1	0.004
365	196	AA9_pssm_15	0.004
366	270	AA13_pssm_9	0.004
367	31	AA1_pssm_10	0.004
368	378	AA18_pssm_17	0.004
369	187	AA9_pssm_6	0.004
370	167	AA8_pssm_6	0.004
371	57	AA2_pssm_16	0.003
372	605	AA13_Polarity	0.003
373	508	AA2_sa_2	0.003
374	124	AA6_pssm_3	0.003
375	561	AA3_Secondary structure	0.003
376	399	AA19_pssm_18	0.003
377	311	AA15_pssm_10	0.003
378	463	AA8_ss_1	0.003
379	206	AA10_pssm_5	0.003
380	515	AA6_sa_1	0.003
381	263	AA13_pssm_2	0.003
382	346	AA17_pssm_5	0.003
383	493	AA18_ss_1	0.003
384	414	AA20_pssm_13	0.003
385	286	AA14_pssm_5	0.003
386	332	AA16_pssm_11	0.003
387	130	AA6_pssm_9	0.003
388	70	AA3_pssm_9	0.003
389	76	AA3_pssm_15	0.003
390	163	AA8_pssm_2	0.003
391	248	AA12_pssm_7	0.003
392	271	AA13_pssm_10	0.003
393	92	AA4_pssm_11	0.003
394	285	AA14_pssm_4	0.003
395	61	AA2_pssm_20	0.003
396	80	AA3_pssm_19	0.003
397	164	AA8_pssm_3	0.003
398	74	AA3_pssm_13	0.003
399	557	AA3_Codon diversity	0.003
400	190	AA9_pssm_9	0.003
401	255	AA12_pssm_14	0.003
402	402	AA20_pssm_1	0.003
403	426	AA21_pssm_5	0.003
404	64	AA3_pssm_3	0.003
405	368	AA18_pssm_7	0.003
406	245	AA12_pssm_4	0.003
407	602	AA13_Codon diversity	0.003
408	114	AA5_pssm_13	0.003
409	407	AA20_pssm_6	0.003
410	610	AA14_Polarity	0.003
411	178	AA8_pssm_17	0.003
412	629	AA18_Molecular volume	0.003
413	112	AA5_pssm_11	0.003
414	562	AA4_Codon diversity	0.003
415	588	AA9_Electrostatic charge	0.003
416	489	AA16_ss_3	0.003
417	342	AA17_pssm_1	0.003
418	488	AA16_ss_2	0.003
419	325	AA16_pssm_4	0.003
420	516	AA6_sa_2	0.003
421	435	AA21_pssm_14	0.003
422	466	AA9_ss_1	0.003
423	29	AA1_pssm_8	0.003
424	628	AA18_Electrostatic charge	0.003
425	266	AA13_pssm_5	0.003
426	162	AA8_pssm_1	0.003
427	560	AA3_Polarity	0.003
428	297	AA14_pssm_16	0.003
429	612	AA15_Codon diversity	0.003
430	77	AA3_pssm_16	0.003
431	375	AA18_pssm_14	0.003
432	533	AA15_sa_1	0.003
433	343	AA17_pssm_2	0.003
434	512	AA4_sa_2	0.003
435	330	AA16_pssm_9	0.003
436	620	AA16_Polarity	0.003
437	97	AA4_pssm_16	0.003
438	36	AA1_pssm_15	0.003
439	436	AA21_pssm_15	0.003
440	257	AA12_pssm_16	0.003
441	234	AA11_pssm_13	0.003
442	45	AA2_pssm_4	0.003
443	631	AA18_Secondary structure	0.003
444	623	AA17_Electrostatic charge	0.003
445	379	AA18_pssm_18	0.003
446	373	AA18_pssm_12	0.003
447	176	AA8_pssm_15	0.003
448	633	AA19_Electrostatic charge	0.003
449	43	AA2_pssm_2	0.002
450	316	AA15_pssm_15	0.002
451	360	AA17_pssm_19	0.002
452	353	AA17_pssm_12	0.002
453	284	AA14_pssm_3	0.002
454	377	AA18_pssm_16	0.002
455	89	AA4_pssm_8	0.002
456	627	AA18_Codon diversity	0.002
457	15	AA15_disorder	0.002
458	549	AA1_Molecular volume	0.002
459	252	AA12_pssm_11	0.002
460	169	AA8_pssm_8	0.002
461	646	AA21_Secondary structure	0.002
462	507	AA2_sa_1	0.002
463	621	AA16_Secondary structure	0.002
464	186	AA9_pssm_5	0.002
465	546	AA21_sa_2	0.002
466	570	AA5_Polarity	0.002
467	552	AA2_Codon diversity	0.002
468	408	AA20_pssm_7	0.002
469	138	AA6_pssm_17	0.002
470	454	AA5_ss_1	0.002
471	154	AA7_pssm_13	0.002
472	420	AA20_pssm_19	0.002
473	337	AA16_pssm_16	0.002
474	534	AA15_sa_2	0.002
475	638	AA20_Electrostatic charge	0.002
476	607	AA14_Codon diversity	0.002
477	619	AA16_Molecular volume	0.002
478	250	AA12_pssm_9	0.002
479	170	AA8_pssm_9	0.002
480	242	AA12_pssm_1	0.002
481	22	AA1_pssm_1	0.002
482	310	AA15_pssm_9	0.002
483	541	AA19_sa_1	0.002
484	49	AA2_pssm_8	0.002
485	494	AA18_ss_2	0.002
486	437	AA21_pssm_16	0.002
487	172	AA8_pssm_11	0.002
488	356	AA17_pssm_15	0.002
489	175	AA8_pssm_14	0.002
490	465	AA8_ss_3	0.002
491	218	AA10_pssm_17	0.002
492	81	AA3_pssm_20	0.002
493	625	AA17_Polarity	0.002
494	96	AA4_pssm_15	0.002
495	485	AA15_ss_2	0.002
496	427	AA21_pssm_6	0.002
497	334	AA16_pssm_13	0.002
498	511	AA4_sa_1	0.002
499	645	AA21_Polarity	0.002
500	397	AA19_pssm_16	0.002
501	388	AA19_pssm_7	0.002
502	376	AA18_pssm_15	0.002
503	390	AA19_pssm_9	0.002
504	73	AA3_pssm_12	0.002
505	592	AA10_Codon diversity	0.002
506	469	AA10_ss_1	0.002
507	444	AA1_ss_3	0.002
508	567	AA5_Codon diversity	0.002
509	472	AA11_ss_1	0.002
510	434	AA21_pssm_13	0.002
511	355	AA17_pssm_14	0.002
512	51	AA2_pssm_10	0.002
513	265	AA13_pssm_4	0.002
514	433	AA21_pssm_12	0.002
515	269	AA13_pssm_8	0.002
516	587	AA9_Codon diversity	0.002
517	38	AA1_pssm_17	0.002
518	404	AA20_pssm_3	0.002
519	88	AA4_pssm_7	0.002
520	496	AA19_ss_1	0.002
521	589	AA9_Molecular volume	0.002
522	401	AA19_pssm_20	0.002
523	336	AA16_pssm_15	0.002
524	264	AA13_pssm_3	0.002
525	542	AA19_sa_2	0.001
526	545	AA21_sa_1	0.001
527	194	AA9_pssm_13	0.001
528	424	AA21_pssm_3	0.001
529	59	AA2_pssm_18	0.001
530	452	AA4_ss_2	0.001
531	341	AA16_pssm_20	0.001
532	67	AA3_pssm_6	0.001
533	486	AA15_ss_3	0.001
534	62	AA3_pssm_1	0.001
535	384	AA19_pssm_3	0.001
536	156	AA7_pssm_15	0.001
537	228	AA11_pssm_7	0.001
538	201	AA9_pssm_20	0.001
539	58	AA2_pssm_17	0.001
540	339	AA16_pssm_18	0.001
541	352	AA17_pssm_11	0.001
542	46	AA2_pssm_5	0.001
543	453	AA4_ss_3	0.001
544	448	AA3_ss_1	0.001
545	398	AA19_pssm_17	0.001
546	244	AA12_pssm_3	0.001
547	387	AA19_pssm_6	0.001
548	571	AA5_Secondary structure	0.001
549	475	AA12_ss_1	0.001
550	39	AA1_pssm_18	0.001
551	84	AA4_pssm_3	0.001
552	606	AA13_Secondary structure	0.001
553	197	AA9_pssm_16	0.001
554	639	AA20_Molecular volume	0.001
555	66	AA3_pssm_5	0.001
556	642	AA21_Codon diversity	0.001
557	630	AA18_Polarity	0.001
558	282	AA14_pssm_1	0.001
559	425	AA21_pssm_4	0.001
560	490	AA17_ss_1	0.001
561	165	AA8_pssm_4	0.001
562	171	AA8_pssm_10	0.001
563	419	AA20_pssm_18	0.001
564	94	AA4_pssm_13	0.001
565	329	AA16_pssm_8	0.001
566	640	AA20_Polarity	0.001
567	288	AA14_pssm_7	0.001
568	568	AA5_Electrostatic charge	0.001
569	641	AA20_Secondary structure	0.001
570	569	AA5_Molecular volume	0.001
571	362	AA18_pssm_1	0.001
572	603	AA13_Electrostatic charge	0.001
573	637	AA20_Codon diversity	0.001
574	556	AA2_Secondary structure	0.001
575	54	AA2_pssm_13	0.001
576	99	AA4_pssm_18	0.001
577	439	AA21_pssm_18	0.001
578	412	AA20_pssm_11	0.001
579	199	AA9_pssm_18	0.001
580	417	AA20_pssm_16	0.001
581	338	AA16_pssm_17	0.001
582	351	AA17_pssm_10	0.001
583	229	AA11_pssm_8	0.001
584	121	AA5_pssm_20	0.001
585	289	AA14_pssm_8	0.001
586	604	AA13_Molecular volume	0.001
587	17	AA17_disorder	0.001
588	160	AA7_pssm_19	0.001
589	359	AA17_pssm_18	0.001
590	75	AA3_pssm_14	0.001
591	555	AA2_Polarity	0.001
592	79	AA3_pssm_18	0.001
593	136	AA6_pssm_15	0.001
594	409	AA20_pssm_8	0.001
595	200	AA9_pssm_19	0.001
596	366	AA18_pssm_5	0.001
597	440	AA21_pssm_19	0.001
598	450	AA3_ss_3	0.001
599	106	AA5_pssm_5	0.001
600	95	AA4_pssm_14	0.001
601	438	AA21_pssm_17	0.001
602	418	AA20_pssm_17	0.001
603	319	AA15_pssm_18	0.001
604	634	AA19_Molecular volume	0.001
605	497	AA19_ss_2	0.001
606	644	AA21_Molecular volume	0.001
607	120	AA5_pssm_19	0.000
608	128	AA6_pssm_7	0.000
609	464	AA8_ss_2	0.000
610	510	AA3_sa_2	0.000
611	415	AA20_pssm_14	0.000
612	111	AA5_pssm_10	0.000
613	328	AA16_pssm_7	0.000
614	363	AA18_pssm_2	0.000
615	400	AA19_pssm_19	0.000
616	256	AA12_pssm_15	0.000
617	365	AA18_pssm_4	0.000
618	119	AA5_pssm_18	0.000
619	32	AA1_pssm_11	0.000
620	643	AA21_Electrostatic charge	0.000
621	540	AA18_sa_2	0.000
622	513	AA5_sa_1	0.000
623	554	AA2_Molecular volume	0.000
624	481	AA14_ss_1	0.000
625	544	AA20_sa_2	0.000
626	268	AA13_pssm_7	0.000
627	618	AA16_Electrostatic charge	0.000
628	100	AA4_pssm_19	0.000
629	558	AA3_Electrostatic charge	0.000
630	152	AA7_pssm_11	0.000
631	93	AA4_pssm_12	0.000
632	191	AA9_pssm_10	0.000
633	274	AA13_pssm_13	0.000
634	461	AA7_ss_2	0.000
635	624	AA17_Molecular volume	0.000
636	287	AA14_pssm_6	0.000
637	478	AA13_ss_1	0.000
638	509	AA3_sa_1	0.000
639	34	AA1_pssm_13	0.000
640	539	AA18_sa_1	0.000
641	514	AA5_sa_2	0.000
642	326	AA16_pssm_5	0.000
643	290	AA14_pssm_9	0.000
644	597	AA12_Codon diversity	0.000
645	389	AA19_pssm_8	0.000
646	483	AA14_ss_3	0.000
647	548	AA1_Electrostatic charge	0.000
648	487	AA16_ss_1	0.000
649	559	AA3_Molecular volume	0.000
650	281	AA13_pssm_20	0.000
651	632	AA19_Codon diversity	0.000
652	276	AA13_pssm_15	0.000
653	564	AA4_Molecular volume	0.000
654	447	AA2_ss_3	0.000
655	322	AA16_pssm_1	0.000
656	547	AA1_Codon diversity	0.000
657	502	AA21_ss_1	0.000
658	543	AA20_sa_1	0.000
659	536	AA16_sa_2	0.000
660	331	AA16_pssm_10	0.000
661	16	AA16_disorder	0.000
662	499	AA20_ss_1	0.000
663	482	AA14_ss_2	0.000
664	484	AA15_ss_1	0.000
665	535	AA16_sa_1	0.000
*** mRMR features ***
Order	Fea	Name	Score
1	217	AA10_pssm_16	0.045
2	526	AA11_sa_2	0.027
3	146	AA7_pssm_5	0.029
4	573	AA6_Electrostatic charge	0.025
5	251	AA12_pssm_10	0.022
6	654	AA8_aa_frequency	0.020
7	233	AA11_pssm_12	0.020
8	659	AA14_aa_frequency	0.019
9	28	AA1_pssm_7	0.018
10	656	AA10_aa_frequency	0.019
11	473	AA11_ss_2	0.017
12	517	AA7_sa_1	0.017
13	317	AA15_pssm_16	0.018
14	459	AA6_ss_3	0.014
15	653	AA7_aa_frequency	0.014
16	650	AA4_aa_frequency	0.014
17	665	AA20_aa_frequency	0.014
18	141	AA6_pssm_20	0.014
19	471	AA10_ss_3	0.013
20	658	AA13_aa_frequency	0.012
21	369	AA18_pssm_8	0.012
22	237	AA11_pssm_16	0.012
23	467	AA9_ss_2	0.012
24	652	AA6_aa_frequency	0.012
25	661	AA16_aa_frequency	0.011
26	664	AA19_aa_frequency	0.011
27	531	AA14_sa_1	0.011
28	648	AA2_aa_frequency	0.011
29	213	AA10_pssm_12	0.010
30	615	AA15_Polarity	0.010
31	47	AA2_pssm_6	0.009
32	344	AA17_pssm_3	0.009
33	500	AA20_ss_2	0.009
34	577	AA7_Codon diversity	0.009
35	470	AA10_ss_2	0.009
36	223	AA11_pssm_2	0.009
37	576	AA6_Secondary structure	0.009
38	666	AA21_aa_frequency	0.009
39	655	AA9_aa_frequency	0.008
40	442	AA1_ss_1	0.008
41	405	AA20_pssm_4	0.007
42	647	AA1_aa_frequency	0.007
43	275	AA13_pssm_14	0.007
44	294	AA14_pssm_13	0.006
45	663	AA18_aa_frequency	0.006
46	598	AA12_Electrostatic charge	0.006
47	593	AA10_Electrostatic charge	0.006
48	142	AA7_pssm_1	0.006
49	183	AA9_pssm_2	0.006
50	140	AA6_pssm_19	0.006
51	525	AA11_sa_1	0.006
52	474	AA11_ss_3	0.006
53	506	AA1_sa_2	0.006
54	492	AA17_ss_3	0.006
55	649	AA3_aa_frequency	0.006
56	216	AA10_pssm_15	0.006
57	340	AA16_pssm_19	0.005
58	102	AA5_pssm_1	0.005
59	215	AA10_pssm_14	0.005
60	261	AA12_pssm_20	0.005
61	129	AA6_pssm_8	0.005
62	380	AA18_pssm_19	0.005
63	586	AA8_Secondary structure	0.005
64	318	AA15_pssm_17	0.005
65	224	AA11_pssm_3	0.005
66	446	AA2_ss_2	0.005
67	660	AA15_aa_frequency	0.005
68	101	AA4_pssm_20	0.004
69	416	AA20_pssm_15	0.004
70	476	AA12_ss_2	0.004
71	518	AA7_sa_2	0.004
72	231	AA11_pssm_10	0.004
73	367	AA18_pssm_6	0.004
74	208	AA10_pssm_7	0.004
75	611	AA14_Secondary structure	0.004
76	132	AA6_pssm_11	0.004
77	584	AA8_Molecular volume	0.004
78	651	AA5_aa_frequency	0.003
79	246	AA12_pssm_5	0.004
80	657	AA12_aa_frequency	0.003
81	410	AA20_pssm_9	0.004
82	635	AA19_Polarity	0.003
83	299	AA14_pssm_18	0.003
84	25	AA1_pssm_4	0.004
85	521	AA9_sa_1	0.003
86	662	AA17_aa_frequency	0.003
87	143	AA7_pssm_2	0.003
88	203	AA10_pssm_2	0.003
89	173	AA8_pssm_12	0.003
90	283	AA14_pssm_2	0.003
91	406	AA20_pssm_5	0.003
92	273	AA13_pssm_12	0.003
93	221	AA10_pssm_20	0.003
94	456	AA5_ss_3	0.003
95	617	AA16_Codon diversity	0.003
96	527	AA12_sa_1	0.003
97	422	AA21_pssm_1	0.003
98	166	AA8_pssm_5	0.002
99	55	AA2_pssm_14	0.002
100	443	AA1_ss_2	0.002
101	306	AA15_pssm_5	0.002
102	202	AA10_pssm_1	0.002
103	278	AA13_pssm_17	0.002
104	86	AA4_pssm_5	0.002
105	411	AA20_pssm_10	0.002
106	236	AA11_pssm_15	0.002
107	396	AA19_pssm_15	0.002
108	394	AA19_pssm_13	0.002
109	184	AA9_pssm_3	0.002
110	302	AA15_pssm_1	0.002
111	83	AA4_pssm_2	0.002
112	491	AA17_ss_2	0.002
113	280	AA13_pssm_19	0.002
114	504	AA21_ss_3	0.002
115	479	AA13_ss_2	0.001
116	596	AA10_Secondary structure	0.002
117	110	AA5_pssm_9	0.001
118	239	AA11_pssm_18	0.001
119	574	AA6_Molecular volume	0.001
120	312	AA15_pssm_11	0.001
121	386	AA19_pssm_5	0.001
122	134	AA6_pssm_13	0.001
123	532	AA14_sa_2	0.001
124	220	AA10_pssm_19	0.001
125	222	AA11_pssm_1	0.001
126	227	AA11_pssm_6	0.001
127	180	AA8_pssm_19	0.001
128	272	AA13_pssm_11	0.001
129	519	AA8_sa_1	0.001
130	204	AA10_pssm_3	0.001
131	495	AA18_ss_3	0.001
132	139	AA6_pssm_18	0.001
133	429	AA21_pssm_8	0.000
134	116	AA5_pssm_15	0.000
135	238	AA11_pssm_17	0.000
136	182	AA9_pssm_1	0.000
137	480	AA13_ss_3	0.000
138	503	AA21_ss_2	0.000
139	226	AA11_pssm_5	0.000
140	50	AA2_pssm_9	0.000
141	595	AA10_Polarity	0.000
142	413	AA20_pssm_12	0.000
143	303	AA15_pssm_2	0.000
144	42	AA2_pssm_1	-0.000
145	230	AA11_pssm_9	-0.000
146	382	AA19_pssm_1	-0.000
147	27	AA1_pssm_6	-0.000
148	581	AA7_Secondary structure	-0.000
149	259	AA12_pssm_18	-0.000
150	523	AA10_sa_1	-0.000
151	78	AA3_pssm_17	-0.000
152	295	AA14_pssm_14	-0.000
153	254	AA12_pssm_13	-0.000
154	158	AA7_pssm_17	-0.000
155	189	AA9_pssm_8	-0.000
156	357	AA17_pssm_16	-0.000
157	60	AA2_pssm_19	-0.000
158	609	AA14_Molecular volume	-0.000
159	622	AA17_Codon diversity	-0.000
160	63	AA3_pssm_2	-0.000
161	209	AA10_pssm_8	-0.001
162	327	AA16_pssm_6	-0.001
163	505	AA1_sa_1	-0.001
164	551	AA1_Secondary structure	-0.001
165	566	AA4_Secondary structure	-0.001
166	590	AA9_Polarity	-0.001
167	135	AA6_pssm_14	-0.001
168	174	AA8_pssm_13	-0.001
169	148	AA7_pssm_7	-0.001
170	44	AA2_pssm_3	-0.001
171	529	AA13_sa_1	-0.001
172	600	AA12_Polarity	-0.001
173	211	AA10_pssm_10	-0.001
174	457	AA6_ss_1	-0.001
175	262	AA13_pssm_1	-0.001
176	538	AA17_sa_2	-0.001
177	104	AA5_pssm_3	-0.001
178	578	AA7_Electrostatic charge	-0.001
179	309	AA15_pssm_8	-0.001
180	508	AA2_sa_2	-0.001
181	430	AA21_pssm_9	-0.001
182	358	AA17_pssm_17	-0.001
183	131	AA6_pssm_10	-0.001
184	501	AA20_ss_3	-0.002
185	5	AA5_disorder	-0.002
186	626	AA17_Secondary structure	-0.002
187	320	AA15_pssm_19	-0.002
188	293	AA14_pssm_12	-0.002
189	528	AA12_sa_2	-0.002
190	583	AA8_Electrostatic charge	-0.002
191	82	AA4_pssm_1	-0.002
192	205	AA10_pssm_4	-0.002
193	629	AA18_Molecular volume	-0.002
194	553	AA2_Electrostatic charge	-0.002
195	241	AA11_pssm_20	-0.002
196	455	AA5_ss_2	-0.002
197	26	AA1_pssm_5	-0.002
198	179	AA8_pssm_18	-0.002
199	267	AA13_pssm_6	-0.002
200	572	AA6_Codon diversity	-0.002
201	563	AA4_Electrostatic charge	-0.002
202	69	AA3_pssm_8	-0.002
203	346	AA17_pssm_5	-0.002
204	591	AA9_Secondary structure	-0.002
205	379	AA18_pssm_18	-0.002
206	219	AA10_pssm_18	-0.002
207	392	AA19_pssm_11	-0.002
208	122	AA6_pssm_1	-0.002
209	522	AA9_sa_2	-0.002
210	298	AA14_pssm_17	-0.002
211	374	AA18_pssm_13	-0.002
212	159	AA7_pssm_18	-0.002
213	87	AA4_pssm_6	-0.002
214	74	AA3_pssm_13	-0.002
215	225	AA11_pssm_4	-0.002
216	614	AA15_Molecular volume	-0.002
217	301	AA14_pssm_20	-0.002
218	40	AA1_pssm_19	-0.002
219	468	AA9_ss_3	-0.002
220	557	AA3_Codon diversity	-0.002
221	619	AA16_Molecular volume	-0.002
222	515	AA6_sa_1	-0.002
223	546	AA21_sa_2	-0.002
224	636	AA19_Secondary structure	-0.002
225	118	AA5_pssm_17	-0.002
226	550	AA1_Polarity	-0.002
227	449	AA3_ss_2	-0.002
228	161	AA7_pssm_20	-0.003
229	541	AA19_sa_1	-0.003
230	616	AA15_Secondary structure	-0.003
231	296	AA14_pssm_15	-0.002
232	277	AA13_pssm_16	-0.003
233	524	AA10_sa_2	-0.003
234	585	AA8_Polarity	-0.003
235	98	AA4_pssm_17	-0.003
236	432	AA21_pssm_11	-0.003
237	308	AA15_pssm_7	-0.003
238	627	AA18_Codon diversity	-0.003
239	638	AA20_Electrostatic charge	-0.003
240	349	AA17_pssm_8	-0.003
241	113	AA5_pssm_12	-0.003
242	335	AA16_pssm_14	-0.003
243	79	AA3_pssm_18	-0.003
244	378	AA18_pssm_17	-0.003
245	608	AA14_Electrostatic charge	-0.003
246	602	AA13_Codon diversity	-0.003
247	127	AA6_pssm_6	-0.003
248	599	AA12_Molecular volume	-0.003
249	188	AA9_pssm_7	-0.003
250	240	AA11_pssm_19	-0.003
251	114	AA5_pssm_13	-0.003
252	286	AA14_pssm_5	-0.003
253	621	AA16_Secondary structure	-0.003
254	428	AA21_pssm_7	-0.003
255	477	AA12_ss_3	-0.003
256	212	AA10_pssm_11	-0.003
257	157	AA7_pssm_16	-0.003
258	561	AA3_Secondary structure	-0.003
259	23	AA1_pssm_2	-0.003
260	520	AA8_sa_2	-0.003
261	314	AA15_pssm_13	-0.003
262	569	AA5_Molecular volume	-0.003
263	350	AA17_pssm_9	-0.003
264	549	AA1_Molecular volume	-0.003
265	370	AA18_pssm_9	-0.003
266	21	AA21_disorder	-0.003
267	210	AA10_pssm_9	-0.003
268	198	AA9_pssm_17	-0.003
269	333	AA16_pssm_12	-0.003
270	562	AA4_Codon diversity	-0.003
271	646	AA21_Secondary structure	-0.003
272	195	AA9_pssm_14	-0.003
273	462	AA7_ss_3	-0.003
274	489	AA16_ss_3	-0.004
275	395	AA19_pssm_14	-0.003
276	552	AA2_Codon diversity	-0.003
277	37	AA1_pssm_16	-0.003
278	76	AA3_pssm_15	-0.004
279	243	AA12_pssm_2	-0.004
280	579	AA7_Molecular volume	-0.004
281	419	AA20_pssm_18	-0.004
282	589	AA9_Molecular volume	-0.004
283	498	AA19_ss_3	-0.004
284	57	AA2_pssm_16	-0.004
285	71	AA3_pssm_10	-0.004
286	605	AA13_Polarity	-0.004
287	393	AA19_pssm_12	-0.004
288	177	AA8_pssm_16	-0.004
289	436	AA21_pssm_15	-0.004
290	339	AA16_pssm_18	-0.004
291	567	AA5_Codon diversity	-0.004
292	601	AA12_Secondary structure	-0.004
293	3	AA3_disorder	-0.004
294	119	AA5_pssm_18	-0.004
295	426	AA21_pssm_5	-0.004
296	414	AA20_pssm_13	-0.004
297	90	AA4_pssm_9	-0.004
298	207	AA10_pssm_6	-0.004
299	137	AA6_pssm_16	-0.004
300	631	AA18_Secondary structure	-0.004
301	348	AA17_pssm_7	-0.004
302	258	AA12_pssm_17	-0.004
303	155	AA7_pssm_14	-0.004
304	633	AA19_Electrostatic charge	-0.004
305	336	AA16_pssm_15	-0.004
306	266	AA13_pssm_5	-0.004
307	321	AA15_pssm_20	-0.004
308	186	AA9_pssm_5	-0.004
309	594	AA10_Molecular volume	-0.004
310	41	AA1_pssm_20	-0.004
311	445	AA2_ss_1	-0.004
312	99	AA4_pssm_18	-0.004
313	530	AA13_sa_2	-0.004
314	115	AA5_pssm_14	-0.004
315	402	AA20_pssm_1	-0.004
316	80	AA3_pssm_19	-0.004
317	512	AA4_sa_2	-0.004
318	580	AA7_Polarity	-0.004
319	354	AA17_pssm_13	-0.004
320	206	AA10_pssm_5	-0.004
321	423	AA21_pssm_2	-0.004
322	575	AA6_Polarity	-0.004
323	300	AA14_pssm_19	-0.004
324	582	AA8_Codon diversity	-0.004
325	109	AA5_pssm_8	-0.004
326	642	AA21_Codon diversity	-0.004
327	381	AA18_pssm_20	-0.004
328	56	AA2_pssm_15	-0.004
329	533	AA15_sa_1	-0.004
330	359	AA17_pssm_18	-0.005
331	196	AA9_pssm_15	-0.004
332	150	AA7_pssm_9	-0.005
333	39	AA1_pssm_18	-0.005
334	494	AA18_ss_2	-0.005
335	435	AA21_pssm_14	-0.005
336	315	AA15_pssm_14	-0.005
337	399	AA19_pssm_18	-0.005
338	316	AA15_pssm_15	-0.005
339	342	AA17_pssm_1	-0.005
340	48	AA2_pssm_7	-0.005
341	270	AA13_pssm_9	-0.005
342	510	AA3_sa_2	-0.005
343	458	AA6_ss_2	-0.005
344	323	AA16_pssm_2	-0.005
345	232	AA11_pssm_11	-0.005
346	641	AA20_Secondary structure	-0.005
347	537	AA17_sa_1	-0.005
348	214	AA10_pssm_13	-0.005
349	162	AA8_pssm_1	-0.005
350	35	AA1_pssm_14	-0.005
351	126	AA6_pssm_5	-0.005
352	383	AA19_pssm_2	-0.005
353	107	AA5_pssm_6	-0.005
354	607	AA14_Codon diversity	-0.005
355	444	AA1_ss_3	-0.005
356	364	AA18_pssm_3	-0.005
357	185	AA9_pssm_4	-0.005
358	431	AA21_pssm_10	-0.005
359	516	AA6_sa_2	-0.005
360	486	AA15_ss_3	-0.005
361	565	AA4_Polarity	-0.005
362	403	AA20_pssm_2	-0.005
363	612	AA15_Codon diversity	-0.005
364	36	AA1_pssm_15	-0.005
365	398	AA19_pssm_17	-0.005
366	181	AA8_pssm_20	-0.005
367	623	AA17_Electrostatic charge	-0.005
368	72	AA3_pssm_11	-0.005
369	453	AA4_ss_3	-0.005
370	46	AA2_pssm_5	-0.005
371	628	AA18_Electrostatic charge	-0.005
372	192	AA9_pssm_11	-0.005
373	604	AA13_Molecular volume	-0.005
374	421	AA20_pssm_20	-0.005
375	178	AA8_pssm_17	-0.005
376	138	AA6_pssm_17	-0.005
377	24	AA1_pssm_3	-0.005
378	620	AA16_Polarity	-0.005
379	556	AA2_Secondary structure	-0.005
380	644	AA21_Molecular volume	-0.005
381	559	AA3_Molecular volume	-0.005
382	361	AA17_pssm_20	-0.005
383	588	AA9_Electrostatic charge	-0.005
384	52	AA2_pssm_11	-0.005
385	493	AA18_ss_1	-0.005
386	247	AA12_pssm_6	-0.005
387	291	AA14_pssm_10	-0.005
388	613	AA15_Electrostatic charge	-0.005
389	7	AA7_disorder	-0.005
390	356	AA17_pssm_15	-0.005
391	397	AA19_pssm_16	-0.005
392	372	AA18_pssm_11	-0.005
393	66	AA3_pssm_5	-0.005
394	91	AA4_pssm_10	-0.005
395	544	AA20_sa_2	-0.005
396	167	AA8_pssm_6	-0.005
397	507	AA2_sa_1	-0.005
398	153	AA7_pssm_12	-0.005
399	279	AA13_pssm_18	-0.005
400	637	AA20_Codon diversity	-0.005
401	38	AA1_pssm_17	-0.005
402	332	AA16_pssm_11	-0.005
403	542	AA19_sa_2	-0.005
404	366	AA18_pssm_5	-0.005
405	58	AA2_pssm_17	-0.005
406	229	AA11_pssm_8	-0.006
407	571	AA5_Secondary structure	-0.006
408	513	AA5_sa_1	-0.006
409	235	AA11_pssm_14	-0.006
410	70	AA3_pssm_9	-0.006
411	193	AA9_pssm_12	-0.006
412	199	AA9_pssm_18	-0.006
413	488	AA16_ss_2	-0.006
414	610	AA14_Polarity	-0.006
415	260	AA12_pssm_19	-0.006
416	376	AA18_pssm_15	-0.006
417	360	AA17_pssm_19	-0.006
418	22	AA1_pssm_1	-0.006
419	606	AA13_Secondary structure	-0.006
420	345	AA17_pssm_4	-0.006
421	639	AA20_Molecular volume	-0.006
422	460	AA7_ss_1	-0.006
423	96	AA4_pssm_15	-0.006
424	106	AA5_pssm_5	-0.006
425	441	AA21_pssm_20	-0.006
426	337	AA16_pssm_16	-0.006
427	130	AA6_pssm_9	-0.006
428	313	AA15_pssm_12	-0.006
429	390	AA19_pssm_9	-0.006
430	151	AA7_pssm_10	-0.006
431	30	AA1_pssm_9	-0.006
432	59	AA2_pssm_18	-0.006
433	242	AA12_pssm_1	-0.006
434	540	AA18_sa_2	-0.006
435	536	AA16_sa_2	-0.006
436	62	AA3_pssm_1	-0.006
437	31	AA1_pssm_10	-0.006
438	587	AA9_Codon diversity	-0.006
439	319	AA15_pssm_18	-0.006
440	170	AA8_pssm_9	-0.006
441	632	AA19_Codon diversity	-0.006
442	625	AA17_Polarity	-0.006
443	117	AA5_pssm_16	-0.006
444	545	AA21_sa_1	-0.006
445	190	AA9_pssm_9	-0.006
446	147	AA7_pssm_6	-0.006
447	434	AA21_pssm_13	-0.006
448	1	AA1_disorder	-0.006
449	297	AA14_pssm_16	-0.006
450	437	AA21_pssm_16	-0.006
451	61	AA2_pssm_20	-0.006
452	634	AA19_Molecular volume	-0.006
453	123	AA6_pssm_2	-0.006
454	77	AA3_pssm_16	-0.006
455	257	AA12_pssm_16	-0.006
456	20	AA20_disorder	-0.006
457	292	AA14_pssm_11	-0.006
458	420	AA20_pssm_19	-0.006
459	326	AA16_pssm_5	-0.006
460	564	AA4_Molecular volume	-0.006
461	404	AA20_pssm_3	-0.006
462	112	AA5_pssm_11	-0.006
463	630	AA18_Polarity	-0.006
464	465	AA8_ss_3	-0.006
465	324	AA16_pssm_3	-0.006
466	154	AA7_pssm_13	-0.006
467	418	AA20_pssm_17	-0.007
468	592	AA10_Codon diversity	-0.006
469	307	AA15_pssm_6	-0.007
470	168	AA8_pssm_7	-0.007
471	263	AA13_pssm_2	-0.007
472	377	AA18_pssm_16	-0.007
473	483	AA14_ss_3	-0.007
474	554	AA2_Molecular volume	-0.007
475	385	AA19_pssm_4	-0.007
476	253	AA12_pssm_12	-0.007
477	450	AA3_ss_3	-0.007
478	547	AA1_Codon diversity	-0.007
479	94	AA4_pssm_13	-0.007
480	502	AA21_ss_1	-0.007
481	624	AA17_Molecular volume	-0.007
482	43	AA2_pssm_2	-0.007
483	105	AA5_pssm_4	-0.007
484	355	AA17_pssm_14	-0.007
485	485	AA15_ss_2	-0.007
486	228	AA11_pssm_7	-0.007
487	452	AA4_ss_2	-0.007
488	407	AA20_pssm_6	-0.007
489	347	AA17_pssm_6	-0.007
490	511	AA4_sa_1	-0.007
491	234	AA11_pssm_13	-0.007
492	136	AA6_pssm_15	-0.007
493	330	AA16_pssm_9	-0.007
494	64	AA3_pssm_3	-0.007
495	645	AA21_Polarity	-0.007
496	438	AA21_pssm_17	-0.007
497	568	AA5_Electrostatic charge	-0.007
498	334	AA16_pssm_13	-0.007
499	375	AA18_pssm_14	-0.007
500	218	AA10_pssm_17	-0.007
501	603	AA13_Electrostatic charge	-0.007
502	558	AA3_Electrostatic charge	-0.007
503	534	AA15_sa_2	-0.007
504	4	AA4_disorder	-0.007
505	322	AA16_pssm_1	-0.007
506	373	AA18_pssm_12	-0.007
507	417	AA20_pssm_16	-0.007
508	597	AA12_Codon diversity	-0.007
509	497	AA19_ss_2	-0.007
510	54	AA2_pssm_13	-0.007
511	164	AA8_pssm_3	-0.007
512	415	AA20_pssm_14	-0.007
513	255	AA12_pssm_14	-0.007
514	618	AA16_Electrostatic charge	-0.007
515	514	AA5_sa_2	-0.007
516	250	AA12_pssm_9	-0.007
517	68	AA3_pssm_7	-0.007
518	427	AA21_pssm_6	-0.007
519	391	AA19_pssm_10	-0.007
520	29	AA1_pssm_8	-0.007
521	85	AA4_pssm_4	-0.007
522	282	AA14_pssm_1	-0.007
523	643	AA21_Electrostatic charge	-0.008
524	125	AA6_pssm_4	-0.008
525	440	AA21_pssm_19	-0.008
526	187	AA9_pssm_6	-0.008
527	338	AA16_pssm_17	-0.008
528	543	AA20_sa_1	-0.008
529	120	AA5_pssm_19	-0.008
530	509	AA3_sa_1	-0.008
531	156	AA7_pssm_15	-0.008
532	496	AA19_ss_1	-0.008
533	34	AA1_pssm_13	-0.008
534	18	AA18_disorder	-0.008
535	49	AA2_pssm_8	-0.008
536	172	AA8_pssm_11	-0.008
537	472	AA11_ss_1	-0.008
538	100	AA4_pssm_19	-0.008
539	447	AA2_ss_3	-0.008
540	269	AA13_pssm_8	-0.008
541	433	AA21_pssm_12	-0.008
542	149	AA7_pssm_8	-0.008
543	535	AA16_sa_1	-0.008
544	97	AA4_pssm_16	-0.008
545	353	AA17_pssm_12	-0.008
546	176	AA8_pssm_15	-0.008
547	570	AA5_Polarity	-0.008
548	384	AA19_pssm_3	-0.008
549	454	AA5_ss_1	-0.008
550	560	AA3_Polarity	-0.008
551	304	AA15_pssm_3	-0.008
552	548	AA1_Electrostatic charge	-0.008
553	124	AA6_pssm_3	-0.008
554	271	AA13_pssm_10	-0.008
555	285	AA14_pssm_4	-0.008
556	539	AA18_sa_1	-0.008
557	103	AA5_pssm_2	-0.008
558	200	AA9_pssm_19	-0.008
559	640	AA20_Polarity	-0.008
560	276	AA13_pssm_15	-0.008
561	92	AA4_pssm_11	-0.008
562	388	AA19_pssm_7	-0.008
563	464	AA8_ss_2	-0.008
564	362	AA18_pssm_1	-0.008
565	33	AA1_pssm_12	-0.008
566	249	AA12_pssm_8	-0.008
567	371	AA18_pssm_10	-0.008
568	53	AA2_pssm_12	-0.009
569	400	AA19_pssm_19	-0.009
570	197	AA9_pssm_16	-0.009
571	133	AA6_pssm_12	-0.009
572	490	AA17_ss_1	-0.009
573	284	AA14_pssm_3	-0.009
574	175	AA8_pssm_14	-0.009
575	352	AA17_pssm_11	-0.009
576	108	AA5_pssm_7	-0.009
577	463	AA8_ss_1	-0.009
578	145	AA7_pssm_4	-0.009
579	424	AA21_pssm_3	-0.009
580	408	AA20_pssm_7	-0.009
581	65	AA3_pssm_4	-0.009
582	163	AA8_pssm_2	-0.009
583	265	AA13_pssm_4	-0.009
584	51	AA2_pssm_10	-0.009
585	290	AA14_pssm_9	-0.009
586	75	AA3_pssm_14	-0.009
587	343	AA17_pssm_2	-0.009
588	2	AA2_disorder	-0.009
589	368	AA18_pssm_7	-0.009
590	484	AA15_ss_1	-0.009
591	169	AA8_pssm_8	-0.009
592	89	AA4_pssm_8	-0.009
593	19	AA19_disorder	-0.009
594	461	AA7_ss_2	-0.009
595	194	AA9_pssm_13	-0.009
596	555	AA2_Polarity	-0.009
597	409	AA20_pssm_8	-0.009
598	160	AA7_pssm_19	-0.009
599	305	AA15_pssm_4	-0.009
600	81	AA3_pssm_20	-0.009
601	264	AA13_pssm_3	-0.009
602	401	AA19_pssm_20	-0.009
603	245	AA12_pssm_4	-0.010
604	144	AA7_pssm_3	-0.010
605	121	AA5_pssm_20	-0.010
606	448	AA3_ss_1	-0.010
607	325	AA16_pssm_4	-0.010
608	310	AA15_pssm_9	-0.010
609	475	AA12_ss_1	-0.010
610	499	AA20_ss_1	-0.010
611	439	AA21_pssm_18	-0.010
612	387	AA19_pssm_6	-0.010
613	45	AA2_pssm_4	-0.010
614	289	AA14_pssm_8	-0.010
615	95	AA4_pssm_14	-0.010
616	311	AA15_pssm_10	-0.010
617	412	AA20_pssm_11	-0.010
618	274	AA13_pssm_13	-0.011
619	482	AA14_ss_2	-0.011
620	466	AA9_ss_1	-0.011
621	6	AA6_disorder	-0.011
622	67	AA3_pssm_6	-0.011
623	351	AA17_pssm_10	-0.011
624	487	AA16_ss_1	-0.011
625	244	AA12_pssm_3	-0.011
626	84	AA4_pssm_3	-0.011
627	171	AA8_pssm_10	-0.011
628	32	AA1_pssm_11	-0.011
629	329	AA16_pssm_8	-0.011
630	287	AA14_pssm_6	-0.011
631	478	AA13_ss_1	-0.011
632	128	AA6_pssm_7	-0.011
633	268	AA13_pssm_7	-0.011
634	10	AA10_disorder	-0.011
635	252	AA12_pssm_11	-0.011
636	111	AA5_pssm_10	-0.012
637	328	AA16_pssm_7	-0.012
638	281	AA13_pssm_20	-0.012
639	425	AA21_pssm_4	-0.012
640	389	AA19_pssm_8	-0.012
641	451	AA4_ss_1	-0.012
642	363	AA18_pssm_2	-0.012
643	165	AA8_pssm_4	-0.012
644	73	AA3_pssm_12	-0.012
645	256	AA12_pssm_15	-0.012
646	201	AA9_pssm_20	-0.012
647	481	AA14_ss_1	-0.012
648	288	AA14_pssm_7	-0.012
649	341	AA16_pssm_20	-0.013
650	469	AA10_ss_1	-0.013
651	248	AA12_pssm_7	-0.013
652	93	AA4_pssm_12	-0.013
653	365	AA18_pssm_4	-0.013
654	11	AA11_disorder	-0.013
655	331	AA16_pssm_10	-0.013
656	152	AA7_pssm_11	-0.013
657	191	AA9_pssm_10	-0.014
658	88	AA4_pssm_7	-0.015
659	14	AA14_disorder	-0.015
660	12	AA12_disorder	-0.016
661	8	AA8_disorder	-0.017
662	13	AA13_disorder	-0.018
663	17	AA17_disorder	-0.019
664	15	AA15_disorder	-0.021
665	9	AA9_disorder	-0.022
666	16	AA16_disorder	-0.024
*** This program and the respective minimum Redundancy Maximum Relevance (mRMR) algorithm were developed by Hanchuan Peng <hanchuan.peng@gmail.com>for the paper "Feature selection based on mutual information: criteria of max-dependency, max-relevance, and min-redundancy," Hanchuan Peng, Fuhui Long, and Chris Ding, IEEE Transactions on Pattern Analysis and Machine Intelligence, Vol. 27, No. 8, pp.…
