# Supplementary material for: Prediction of carbamylated lysine sites based on the one-class k -nearest neighbor method
Source: Royal Society of Chemistry journal article supplement (doi:10.1039/c3mb70195f), 2013-08-13
Supplement: c3mb70195f_4.csv [file c3mb70195f_4.csv]

class	AA10_pssm_16	AA11_sa_2	AA7_pssm_5	AA6_Electrostatic charge	AA12_pssm_10	AA8_aa_frequency	AA11_pssm_12	AA14_aa_frequency	AA1_pssm_7	AA10_aa_frequency	AA11_ss_2	AA7_sa_1	AA15_pssm_16	AA6_ss_3	AA7_aa_frequency	AA4_aa_frequency	AA20_aa_frequency	AA6_pssm_20	AA10_ss_3	AA13_aa_frequency	AA18_pssm_8	AA11_pssm_16	AA9_ss_2	AA6_aa_frequency	AA16_aa_frequency	AA19_aa_frequency	AA14_sa_1	AA2_aa_frequency	AA10_pssm_12	AA15_Polarity	AA2_pssm_6	AA17_pssm_3	AA20_ss_2	AA7_Codon diversity	AA10_ss_2	AA11_pssm_2	AA6_Secondary structure	AA21_aa_frequency	AA9_aa_frequency	AA1_ss_1	AA20_pssm_4	AA1_aa_frequency	AA13_pssm_14	AA14_pssm_13	AA18_aa_frequency	AA12_Electrostatic charge	AA10_Electrostatic charge	AA7_pssm_1	AA9_pssm_2
1	-2	0	0	-0.146	6	4.3478	1	21.739	-1	2.1739	0	1	-4	0	6.5217	6.5217	6.5217	-3	0	2.1739	-4	-3	0	4.3478	8.6957	2.1739	1	17.391	-4	-1.006	-1	-2	0	0.44	0	3	-1.302	4.3478	2.1739	1	-6	6.5217	-2	-2	2.1739	0.816	2.064	-2	-3
1	-3	0	0	-1.262	1	6.5217	7	4.3478	-2	4.3478	1	1	-1	1	6.5217	8.6957	8.6957	2	0	6.5217	-4	-2	1	2.1739	2.1739	17.391	1	2.1739	-3	-0.591	-1	-3	0	-0.397	1	-1	-0.279	8.6957	6.5217	1	3	4.3478	4	4	8.6957	-0.912	-0.146	-1	-2
1	-2	0	0	-0.837	-1	4.3478	7	4.3478	2	21.739	1	1	0	1	19.565	13.043	8.6957	0	0	6.5217	-4	0	1	2.1739	10.87	17.391	1	2.1739	-3	-0.591	0	-4	0	0.393	1	-1	-1.453	8.6957	23.913	1	-1	4.3478	2	2	8.6957	-0.912	0.816	-1	-3
1	-5	0	-3	0.816	4	10.87	7	6.5217	0	15.217	1	0	-3	1	2.1739	13.043	10.87	3	0	17.391	-4	-3	1	4.3478	4.3478	4.3478	1	8.6957	-5	-0.384	1	5	0	-1.474	1	-1	-0.547	8.6957	2.1739	1	-4	6.5217	-6	-4	8.6957	-0.912	-0.912	-2	-4
1	-2	1	0	-0.078	1	10.87	5	13.043	2	15.217	0	1	3	0	19.565	4.3478	10.87	1	0	6.5217	2	-2	0	8.6957	2.1739	17.391	1	4.3478	-2	-0.228	1	0	0	0.393	0	2	-0.417	8.6957	23.913	1	-1	13.043	1	5	2.1739	-1.262	-0.912	-1	-1
1	-5	0	4	2.064	3	6.5217	7	15.217	2	28.261	1	1	2	1	19.565	10.87	8.6957	-6	0	17.391	5	-3	1	39.13	19.565	2.1739	1	8.6957	-6	-0.591	-3	-1	0	0.393	1	0	1.652	10.87	13.043	1	2	8.6957	8	9	17.391	-1.262	0.412	1	-4
2	3	1	-5	-0.912	3	15.217	3	15.217	-2	0	0	1	-1	0	19.565	13.043	6.5217	2	0	2.1739	4	-2	0	2.1739	2.1739	6.5217	1	13.043	-4	1.831	-1	-3	0	0.393	0	4	-0.987	4.3478	4.3478	1	-1	6.5217	3	0	2.1739	0.933	-2.647	-3	-5
2	-3	1	-2	-2.647	-4	4.3478	2	0	-3	15.217	0	0	2	0	0	10.87	2.1739	-2	0	17.391	0	-1	0	0	0	6.5217	0	8.6957	0	-0.228	-5	0	0	-0.277	0	1	1.399	2.1739	4.3478	1	2	6.5217	5	-4	8.6957	-3.242	-0.912	0	-5
2	-1	0	-1	-2.647	1	2.1739	2	2.1739	-3	28.261	0	1	1	1	6.5217	2.1739	6.5217	-3	0	0	-3	0	0	0	4.3478	13.043	1	13.043	-1	-0.032	2	0	0	-0.397	0	0	1.399	2.1739	0	1	-5	6.5217	-4	-1	0	-1.853	0.412	-1	1
2	-5	1	-4	0.816	-1	0	3	0	-2	15.217	0	1	-2	0	4.3478	2.1739	15.217	2	0	4.3478	-3	-1	0	4.3478	19.565	2.1739	0	4.3478	-5	-1.019	-2	0	0	1.266	0	1	-0.547	8.6957	6.5217	0	0	6.5217	0	3	8.6957	-2.647	-0.912	-3	3
2	-5	1	-4	-0.184	-7	2.1739	4	2.1739	2	2.1739	0	1	-2	0	4.3478	6.5217	6.5217	-4	1	2.1739	-2	-2	0	2.1739	2.1739	0	0	6.5217	-5	1.831	2	-3	0	1.266	0	0	0.009	2.1739	0	1	-2	19.565	-2	-6	17.391	2.064	-1.853	-4	0
2	-3	1	-6	-1.853	-6	15.217	1	13.043	5	2.1739	0	0	0	1	0	6.5217	0	2	1	0	-5	-2	0	0	2.1739	0	1	0	-4	1.05	1	-6	0	-0.277	0	6	-0.179	0	6.5217	1	-4	19.565	-5	-2	2.1739	-0.837	2.064	-1	-6
2	-2	1	-2	-0.255	-2	10.87	4	15.217	-4	4.3478	0	1	-3	0	2.1739	4.3478	2.1739	0	1	2.1739	-4	-3	0	0	4.3478	0	1	4.3478	1	-1.337	-2	-1	0	-0.838	0	4	0.465	2.1739	2.1739	1	-5	13.043	-2	4	4.3478	-0.837	-0.146	-3	-4
2	-2	1	-2	-1.262	-5	10.87	0	0	-4	0	0	1	-3	1	0	13.043	0	3	1	0	-1	0	0	2.1739	0	2.1739	1	2.1739	-4	-1.019	-5	-3	0	-1.005	0	-2	-0.279	4.3478	6.5217	0	-6	8.6957	-2	-2	4.3478	1.512	-3.242	-4	-3
2	3	1	-4	-2.647	-4	2.1739	3	2.1739	-5	15.217	0	1	-5	0	2.1739	13.043	0	5	0	2.1739	1	1	0	0	2.1739	0	0	6.5217	-4	-1.239	-5	-1	0	-0.838	0	2	1.399	4.3478	10.87	0	-1	8.6957	0	-4	0	1.648	-0.912	-1	-6
2	1	1	-6	1.512	2	4.3478	1	2.1739	-5	0	0	0	0	0	4.3478	8.6957	13.043	-4	0	4.3478	-1	-3	0	0	4.3478	0	0	4.3478	3	1.357	-3	-2	0	1.266	0	8	0.83	4.3478	4.3478	0	5	8.6957	-4	0	6.5217	0.816	1.648	-4	-5
2	-1	1	-2	-1.853	0	4.3478	4	0	-1	0	0	0	0	0	2.1739	8.6957	6.5217	-3	0	2.1739	-2	0	0	0	2.1739	6.5217	0	2.1739	-1	1.357	-2	-2	0	-1.474	0	1	-0.179	8.6957	10.87	0	-1	4.3478	1	0	8.6957	2.064	-0.837	0	-4
2	-1	1	0	-2.647	-3	15.217	2	4.3478	-5	15.217	0	0	0	1	4.3478	6.5217	8.6957	-3	1	15.217	-4	0	0	0	6.5217	10.87	0	13.043	2	-0.228	1	-5	0	1.266	0	3	1.399	15.217	4.3478	1	1	6.5217	-1	-4	0	0.933	-0.912	0	0
2	0	1	-1	0.816	-4	2.1739	6	15.217	4	0	0	1	0	0	15.217	15.217	0	0	0	0	-5	-3	0	4.3478	19.565	0	0	2.1739	-5	1.357	-4	-3	0	1.242	0	5	-0.547	0	10.87	1	0	6.5217	2	0	2.1739	-1.853	-2.647	-3	-3
2	-1	1	-3	-0.837	-4	17.391	0	15.217	-2	2.1739	0	0	-3	0	6.5217	4.3478	0	-1	0	0	0	-3	0	2.1739	19.565	0	0	13.043	2	1.831	-3	0	0	-0.397	0	1	-1.453	0	0	1	0	4.3478	-6	-4	0	-0.912	-1.853	-3	5
2	-2	1	-3	-1.853	5	2.1739	6	0	-4	15.217	0	0	0	0	0	4.3478	0	-3	1	0	0	-3	0	0	0	0	0	4.3478	3	0	2	0	0	-0.277	0	6	-0.179	0	0	1	0	8.6957	0	0	0	-0.912	-0.912	-3	4
2	3	1	-5	-0.184	-1	4.3478	0	13.043	0	15.217	0	0	-4	1	2.1739	2.1739	6.5217	-3	1	0	-3	-1	0	2.1739	19.565	4.3478	1	0	-3	-1.019	-2	-4	0	0.421	0	1	0.009	2.1739	6.5217	0	-7	13.043	-4	2	17.391	0.412	-0.912	-2	3
2	0	0	-4	-0.912	-6	2.1739	2	13.043	-6	2.1739	0	1	-1	0	0	6.5217	6.5217	-2	1	0	-3	2	0	2.1739	19.565	13.043	1	8.6957	-3	-1.337	-5	-2	0	0.908	0	2	-0.987	2.1739	0	1	1	6.5217	-5	-2	6.5217	0.412	1.313	0	3
2	-2	1	-5	0.412	-1	2.1739	5	21.739	-4	15.217	0	0	0	0	0	0	6.5217	-6	0	4.3478	-2	-2	0	2.1739	19.565	2.1739	0	10.87	-1	0.945	7	-2	0	0.113	0	3	-0.59	2.1739	6.5217	0	-1	2.1739	1	-2	8.6957	-2.647	-0.912	0	-4
2	-5	1	-2	-2.647	-4	2.1739	4	0	3	15.217	0	1	-1	0	4.3478	6.5217	13.043	3	0	15.217	0	-3	0	0	19.565	0	0	17.391	-5	-1.239	0	0	0	1.266	0	3	1.399	4.3478	0	1	3	19.565	-3	-2	8.6957	0.933	-0.912	-1	3
2	-3	1	0	-3.242	-4	10.87	1	13.043	-2	15.217	0	1	1	0	0	0	2.1739	-1	0	2.1739	-5	-2	0	2.1739	4.3478	6.5217	1	8.6957	-4	0.26	-1	0	0	0.113	0	0	0.302	8.6957	0	0	2	2.1739	1	0	2.1739	1.648	-0.912	3	-2
2	-2	1	-1	-0.837	5	4.3478	3	0	-1	0	0	0	-3	0	19.565	10.87	6.5217	0	0	15.217	-2	1	0	2.1739	2.1739	2.1739	0	4.3478	1	-1.239	0	-2	0	0.393	0	0	-1.453	15.217	4.3478	0	-7	6.5217	-2	-3	6.5217	0.816	1.648	0	-4
2	0	1	-1	1.512	3	2.1739	1	21.739	-3	0	0	1	-3	0	19.565	4.3478	10.87	-4	0	15.217	-1	-2	0	0	4.3478	6.5217	0	13.043	0	-1.343	2	-2	0	0.393	0	1	0.83	10.87	10.87	1	-4	6.5217	-5	-3	0	-0.912	-2.647	3	-1
2	-5	1	-5	-2.647	1	2.1739	4	0	0	15.217	0	1	1	0	6.5217	6.5217	2.1739	1	0	4.3478	-2	-1	0	0	19.565	13.043	0	0	-3	-0.228	0	1	0	-0.397	0	3	1.399	2.1739	4.3478	0	-3	0	2	-3	2.1739	-0.146	-0.912	0	0
2	1	0	-4	2.064	-4	2.1739	8	0	-3	2.1739	0	0	-5	1	6.5217	6.5217	2.1739	-6	0	0	-6	-3	0	39.13	4.3478	6.5217	1	6.5217	-2	-1.019	-6	3	0	-0.397	0	0	1.652	2.1739	0	1	-2	0	-5	-3	2.1739	-0.146	-1.853	-4	5
2	2	1	-6	1.512	-4	2.1739	6	2.1739	-2	4.3478	0	0	-1	0	2.1739	15.217	0	-4	0	4.3478	-2	-2	0	0	19.565	2.1739	1	0	-4	1.05	-2	-4	0	-0.169	0	3	0.83	8.6957	0	1	-6	6.5217	-3	0	4.3478	2.897	-0.146	-3	0
2	0	1	-1	-0.912	1	0	2	15.217	-3	0	0	0	1	0	0	6.5217	10.87	-2	0	4.3478	-2	0	0	2.1739	19.565	2.1739	1	4.3478	2	0.189	-4	0	0	0.113	0	2	-0.987	4.3478	0	1	-4	13.043	-5	5	8.6957	0.816	-0.837	1	-4
2	-2	0	-4	2.897	5	6.5217	5	0	3	15.217	0	1	-1	0	4.3478	6.5217	2.1739	-3	1	2.1739	-2	-2	0	8.6957	2.1739	17.391	1	0	-4	1.357	1	-5	0	1.266	0	5	-0.055	4.3478	6.5217	1	-3	19.565	-3	5	8.6957	-1.262	-0.912	-1	2
2	1	1	-5	-0.837	-3	10.87	4	13.043	-4	2.1739	0	1	-1	1	2.1739	0	10.87	-3	1	15.217	-4	0	0	2.1739	19.565	0	1	13.043	-2	1.05	-1	-6	0	-1.474	0	2	-1.453	2.1739	15.217	0	-3	6.5217	-4	1	8.6957	-3.242	1.313	-4	-3
2	-4	0	-4	-0.255	-4	2.1739	5	2.1739	-2	15.217	0	0	-3	1	4.3478	6.5217	0	4	1	0	-2	-2	0	0	4.3478	13.043	0	0	-5	0.336	-3	0	0	1.266	0	6	0.465	4.3478	4.3478	0	-5	6.5217	-4	-4	17.391	2.897	-0.912	-2	-2
2	-1	0	-4	-0.078	-3	0	7	6.5217	-3	0	0	1	0	1	32.609	6.5217	2.1739	-5	0	0	0	-2	0	8.6957	10.87	6.5217	0	4.3478	2	-1.343	-2	-4	0	1.57	0	1	-0.417	10.87	2.1739	0	-5	2.1739	-3	-2	17.391	-0.837	2.897	2	2
2	-2	1	-6	-3.242	-4	15.217	3	2.1739	-3	15.217	0	0	0	1	4.3478	6.5217	0	-6	0	2.1739	-2	2	0	2.1739	19.565	2.1739	1	8.6957	0	0.189	-5	-3	0	1.045	0	1	0.302	2.1739	0	0	-2	4.3478	-3	0	6.5217	1.313	-0.912	-1	-3
2	-4	1	-4	-1.262	-5	2.1739	5	0	0	17.391	0	1	0	0	6.5217	8.6957	0	2	0	0	0	-3	1	2.1739	0	0	0	17.391	-5	0	-3	0	0	0.44	1	2	-0.279	0	13.043	0	0	6.5217	0	0	0	-1.853	-1.262	-1	4
2	-5	1	-3	-1.392	5	2.1739	2	0	0	15.217	1	0	-1	1	0	0	6.5217	-2	0	6.5217	-4	-1	1	13.043	2.1739	2.1739	0	0	-5	0.189	0	-1	1	0.67	1	-1	2.081	2.1739	6.5217	0	-6	0	-4	-2	0	0.816	-0.912	1	3
2	-4	0	-2	-3.242	-5	2.1739	0	15.217	-4	15.217	0	1	-2	0	19.565	4.3478	6.5217	-4	0	0	-1	-1	0	2.1739	2.1739	0	1	6.5217	-5	1.357	-4	-4	0	0.393	0	4	0.302	2.1739	2.1739	0	-5	4.3478	-4	6	6.5217	-1.392	-0.912	2	1
2	-2	1	-4	-0.837	3	4.3478	3	21.739	-3	4.3478	0	0	-1	0	0	10.87	6.5217	1	0	6.5217	-3	0	0	2.1739	19.565	2.1739	0	6.5217	-1	1.831	-4	-2	0	0.67	0	2	-1.453	4.3478	10.87	0	-5	0	0	-1	4.3478	0.816	-0.146	3	-3
2	-1	1	-4	-0.146	3	10.87	3	0	-2	0	0	0	-1	0	0	0	2.1739	0	0	15.217	4	-1	0	4.3478	0	13.043	0	4.3478	1	0.336	0	-2	0	-0.277	0	1	-1.302	2.1739	2.1739	1	-2	6.5217	-4	-2	8.6957	-0.912	-0.837	1	-3
2	-2	1	-3	1.512	-4	0	1	4.3478	1	4.3478	0	0	1	0	0	13.043	0	-1	0	17.391	-4	-1	0	0	19.565	4.3478	0	2.1739	-3	1.538	-1	-3	1	0.113	0	4	0.83	4.3478	4.3478	1	-3	4.3478	6	-3	2.1739	-0.078	-0.146	1	-3
2	-2	1	-4	-0.078	4	2.1739	5	15.217	2	15.217	0	1	0	0	6.5217	6.5217	2.1739	-4	1	2.1739	-2	-2	0	8.6957	2.1739	17.391	1	13.043	-4	1.357	2	-4	0	-0.397	0	5	-0.417	2.1739	2.1739	1	-3	19.565	-3	5	8.6957	0.816	-0.912	-3	1
2	1	1	-4	-0.837	-3	10.87	4	0	-5	2.1739	0	1	-1	0	2.1739	0	0	-3	1	4.3478	-3	0	0	2.1739	19.565	0	1	13.043	-2	1.357	-1	-4	0	-1.474	0	3	-1.453	4.3478	15.217	0	-1	6.5217	-4	0	4.3478	1.313	1.313	-3	-3
2	-4	1	0	-0.912	-2	2.1739	4	21.739	-4	15.217	0	1	0	0	0	13.043	0	-3	0	6.5217	1	-1	0	2.1739	19.565	17.391	0	2.1739	-4	0.945	-2	-2	1	-1.02	0	5	-0.987	2.1739	4.3478	0	-5	2.1739	0	-4	17.391	-3.242	-0.912	1	-3
2	-5	1	0	0	5	0	2	6.5217	0	2.1739	1	0	-2	0	0	0	6.5217	0	0	0	-5	-1	0	0	19.565	2.1739	1	0	-5	0.189	0	-1	1	0	1	-1	0	2.1739	0	0	-6	0	-3	-3	2.1739	-0.912	1.212	0	0
2	-1	1	1	-3.242	2	10.87	-1	4.3478	-4	2.1739	0	1	-2	0	15.217	6.5217	15.217	-4	1	0	-5	1	0	2.1739	19.565	2.1739	1	4.3478	-1	0.336	-5	-3	0	1.242	0	-1	0.302	2.1739	23.913	1	-4	2.1739	-5	-3	0	1.212	2.064	-1	-1
2	-4	0	-2	-1.392	-5	2.1739	3	13.043	1	0	0	1	-3	0	2.1739	4.3478	2.1739	-1	1	2.1739	-4	-1	0	13.043	4.3478	0	1	13.043	-4	1.831	-1	0	0	-1.474	0	0	2.081	4.3478	10.87	0	-4	4.3478	-5	-1	0	-1.392	-0.255	-2	1
2	-4	1	-4	-0.255	-4	2.1739	5	21.739	-1	4.3478	0	1	-3	1	0	6.5217	2.1739	3	1	6.5217	-2	-3	0	0	2.1739	13.043	0	0	-5	1.05	-3	0	0	-0.277	0	6	0.465	4.3478	4.3478	0	-5	4.3478	-4	-3	17.391	2.897	-0.146	-2	-2
2	-3	0	-4	1.648	-2	2.1739	0	15.217	-5	0	0	0	-4	1	6.5217	4.3478	2.1739	-2	0	15.217	-2	-3	0	8.6957	2.1739	6.5217	1	13.043	-3	-1.343	-2	-2	0	0.44	0	6	-0.561	4.3478	0	0	4	0	-3	1	17.391	-0.837	-3.242	-2	1
2	-1	0	-2	0.412	0	15.217	4	0	-5	0	0	0	0	0	0	6.5217	15.217	0	1	6.5217	-3	-2	0	2.1739	8.6957	2.1739	1	2.1739	1	-0.384	-1	-1	0	0.67	0	3	-0.59	2.1739	2.1739	1	-4	6.5217	7	0	6.5217	-1.262	-0.837	-2	-3
2	2	1	-3	-2.647	-4	2.1739	3	0	-5	2.1739	0	1	-1	0	32.609	4.3478	6.5217	-5	1	0	1	-2	0	0	0	0	1	2.1739	-3	1.357	-3	-1	0	1.57	0	2	1.399	15.217	2.1739	0	-2	0	-3	-4	17.391	-3.242	-1.392	7	0
2	1	0	-4	-0.078	-3	0	7	0	-3	2.1739	0	0	-2	1	2.1739	6.5217	2.1739	-6	0	2.1739	1	-3	0	8.6957	0	6.5217	0	4.3478	0	-0.384	-3	-2	0	0.421	0	0	-0.417	10.87	0	0	-4	2.1739	1	-3	17.391	-0.837	1.313	2	0
2	-2	1	1	-0.912	-4	2.1739	0	6.5217	-2	28.261	0	1	2	0	32.609	6.5217	2.1739	1	0	0	-3	-2	0	2.1739	2.1739	13.043	1	4.3478	-3	-0.228	-3	0	0	1.57	0	-2	-0.987	4.3478	4.3478	0	-2	8.6957	-1	-2	8.6957	-1.853	0.412	4	0
2	-2	1	-3	-0.837	-2	4.3478	2	6.5217	5	2.1739	0	0	-3	0	0	4.3478	0	-1	0	4.3478	-3	-1	0	2.1739	2.1739	2.1739	1	10.87	-2	1.05	2	-4	0	0.113	0	0	-1.453	2.1739	4.3478	1	-6	10.87	-1	-4	0	0.412	-1.853	-2	-5
2	0	1	1	-2.647	5	4.3478	3	0	-5	0	0	0	-5	0	2.1739	2.1739	13.043	-3	0	6.5217	2	-2	0	0	2.1739	2.1739	0	10.87	-2	-1.019	1	-3	0	-0.259	0	4	1.399	4.3478	15.217	1	5	6.5217	5	-5	4.3478	0.816	-0.255	-2	-5
2	-5	1	-2	1.648	-1	2.1739	1	21.739	-3	15.217	0	1	-1	0	19.565	0	6.5217	-5	1	0	-2	0	0	8.6957	2.1739	17.391	0	4.3478	-5	1.05	-2	-2	1	0.393	0	-3	-0.561	4.3478	0	1	2	2.1739	-3	-2	2.1739	0.412	-0.912	-2	1
2	-2	1	-4	1.512	-4	2.1739	2	0	-2	28.261	0	0	-2	0	2.1739	13.043	6.5217	-2	1	17.391	-4	-1	0	0	19.565	2.1739	1	2.1739	-1	-1.239	-4	-1	0	-0.259	0	-1	0.83	4.3478	0	1	1	4.3478	-3	-2	2.1739	-0.837	0.412	-3	-3
2	-1	0	-3	1.648	4	0	2	8.6957	2	0	1	0	-3	1	6.5217	10.87	4.3478	-5	1	4.3478	-4	-1	0	8.6957	2.1739	2.1739	1	4.3478	0	-1.019	-5	1	0	-0.397	0	0	-0.561	2.1739	0	1	-3	10.87	-1	-3	4.3478	0.816	-3.242	0	-1
2	-2	1	0	-0.912	-4	2.1739	3	0	0	0	0	1	-4	0	0	13.043	6.5217	3	1	0	-4	0	0	2.1739	0	0	0	4.3478	5	-1.337	0	0	0	0.908	0	2	-0.987	4.3478	0	0	0	10.87	2	-1	8.6957	-0.837	-0.837	-3	1
2	2	1	-3	0.933	-5	2.1739	2	0	4	0	0	0	-3	0	15.217	0	6.5217	-4	1	0	-6	3	0	0	4.3478	2.1739	0	0	-1	-1.337	1	-5	0	1.242	0	-2	0.828	4.3478	0	0	-3	19.565	-3	-4	0	1.512	-3.242	-1	-1
2	-4	1	-3	-0.146	-5	2.1739	1	15.217	-4	15.217	0	0	-3	1	4.3478	8.6957	0	-1	1	0	0	0	1	4.3478	2.1739	0	1	6.5217	-4	1.831	-3	0	0	1.045	0	2	-1.302	0	4.3478	0	0	8.6957	-6	1	0	0.412	-0.912	-3	0
2	-4	1	-4	-0.912	-4	4.3478	5	0	0	15.217	1	0	0	1	0	8.6957	0	2	0	0	0	-3	1	2.1739	0	0	0	17.391	-5	0	-2	0	0	-0.277	1	2	-0.987	0	4.3478	0	0	0	0	0	0	-0.078	-0.912	-1	3
2	-5	1	0	0	-3	0	-2	15.217	0	15.217	1	0	-3	0	0	0	6.5217	0	0	6.5217	-6	-3	1	0	4.3478	2.1739	1	0	-5	1.05	0	-1	0	0	1	2	0	8.6957	0	0	-7	0	0	-1	2.1739	0.933	-0.912	0	-1
2	-2	0	2	0.933	-3	2.1739	1	0	-2	15.217	0	1	-1	1	4.3478	6.5217	6.5217	-4	0	6.5217	0	-1	0	0	4.3478	2.1739	1	0	-4	-0.663	-3	-2	0	1.266	0	1	0.828	2.1739	0	0	0	2.1739	1	0	2.1739	-0.146	-0.912	1	0
2	-3	0	-1	-3.242	-1	0	3	2.1739	-3	2.1739	0	1	-2	0	4.3478	6.5217	13.043	0	0	6.5217	0	-3	0	2.1739	2.1739	2.1739	1	2.1739	-2	-1.019	-3	-2	0	1.266	0	4	0.302	4.3478	6.5217	0	2	6.5217	-2	0	0	1.212	1.512	4	-1
2	-2	1	-2	1.648	-1	0	3	0	1	15.217	0	0	-1	0	0	6.5217	15.217	1	0	2.1739	-3	-1	0	8.6957	2.1739	17.391	0	8.6957	0	1.05	-4	3	1	-1.005	0	2	-0.561	8.6957	4.3478	1	-4	4.3478	-1	-4	2.1739	-0.146	-0.912	0	-2
2	1	1	-1	0.816	-2	0	0	6.5217	2	0	0	1	-4	0	4.3478	4.3478	10.87	0	1	0	-4	0	0	4.3478	0	2.1739	0	2.1739	0	-1.006	0	-4	1	1.266	0	-1	-0.547	8.6957	6.5217	1	-3	13.043	-4	-2	2.1739	-3.242	-0.255	2	0
2	-3	0	-1	1.212	-2	2.1739	1	0	0	28.261	0	1	-1	0	0	6.5217	2.1739	0	1	6.5217	-3	-1	1	0	2.1739	0	0	2.1739	-1	1.357	-2	-3	0	0.908	0	0	-1.524	15.217	10.87	0	-1	4.3478	-4	-3	2.1739	0.933	0.412	2	-4
2	-1	0	-3	1.648	2	2.1739	0	0	-3	0	0	0	-1	1	2.1739	2.1739	0	-4	0	4.3478	2	-1	0	8.6957	2.1739	2.1739	1	2.1739	2	-0.228	-4	-2	0	-0.169	0	1	-0.561	10.87	0	0	-3	0	-2	-2	6.5217	0.412	-0.837	1	-3
2	-2	1	-4	0.412	-5	2.1739	3	2.1739	2	4.3478	0	0	-1	0	4.3478	8.6957	0	0	0	0	-2	1	0	2.1739	10.87	13.043	1	2.1739	1	-1.006	-1	-4	0	1.266	0	0	-0.59	4.3478	13.043	0	-3	4.3478	0	2	4.3478	-3.242	-0.146	1	0
2	0	1	-1	-1.853	-3	0	4	2.1739	-5	4.3478	0	0	-4	0	32.609	4.3478	13.043	-3	1	2.1739	-2	0	0	0	6.5217	13.043	0	4.3478	0	-1.337	2	-6	0	1.57	0	4	-0.179	8.6957	4.3478	1	8	6.5217	0	-4	4.3478	-1.392	-0.146	4	1
2	-1	1	0	-0.078	-4	4.3478	0	0	-3	2.1739	0	0	-1	1	2.1739	15.217	2.1739	-3	0	15.217	-3	-1	0	8.6957	4.3478	2.1739	1	4.3478	-5	0.931	-2	-6	0	0.421	0	1	-0.417	15.217	0	0	-2	4.3478	4	2	2.1739	-0.146	1.512	0	0
2	0	0	-5	-2.647	3	4.3478	-2	15.217	3	4.3478	1	0	-4	1	32.609	0	0	-2	0	2.1739	-6	-2	0	0	8.6957	2.1739	1	4.3478	1	-0.663	2	-2	0	1.57	1	-2	1.399	15.217	6.5217	1	1	6.5217	-3	3	2.1739	0.816	-0.146	-1	-5
2	5	0	-3	1.212	5	2.1739	2	0	0	0	1	1	-4	0	0	6.5217	6.5217	0	0	2.1739	-6	0	1	0	4.3478	10.87	1	8.6957	-3	-1.337	-5	0	0	0.908	1	5	-1.524	4.3478	0	0	-3	6.5217	-2	1	2.1739	-1.262	-2.647	-1	2
2	1	1	-4	2.897	-5	10.87	2	0	-6	2.1739	0	1	-5	0	6.5217	15.217	0	-3	1	6.5217	-6	-1	1	8.6957	10.87	2.1739	1	13.043	2	-1.239	-4	-4	1	-0.397	0	5	-0.055	4.3478	15.217	0	-6	8.6957	-5	-3	8.6957	-1.392	-1.392	-5	-4
2	3	1	0	-0.837	4	6.5217	5	13.043	-5	4.3478	0	0	-4	0	15.217	6.5217	6.5217	-4	1	4.3478	-1	-2	0	2.1739	4.3478	0	1	10.87	-1	-1.337	3	-3	0	1.242	0	4	-1.453	2.1739	23.913	1	-4	4.3478	2	-3	17.391	-0.146	-0.146	3	-2
2	-2	1	-3	-1.262	-5	2.1739	3	15.217	1	2.1739	0	1	-3	0	0	4.3478	10.87	7	1	2.1739	-6	-1	1	2.1739	8.6957	2.1739	0	8.6957	-4	-0.591	-2	-1	0	0.113	0	3	-0.279	15.217	2.1739	0	3	4.3478	-2	-4	8.6957	0.933	2.064	-3	-5
2	-5	0	1	-0.146	-4	2.1739	8	13.043	-4	21.739	1	1	-5	0	4.3478	6.5217	2.1739	4	0	17.391	7	-3	1	4.3478	10.87	2.1739	1	2.1739	-5	0.26	-3	-2	0	1.266	1	-1	-1.302	8.6957	6.5217	1	-2	8.6957	-5	-4	17.391	-0.146	0.816	-1	-5
2	-5	1	-3	0.816	-5	0	3	4.3478	-3	15.217	0	1	-3	0	6.5217	8.6957	8.6957	3	1	2.1739	-5	3	0	4.3478	19.565	6.5217	0	4.3478	-5	1.538	-5	-4	0	-0.397	0	2	-0.547	0	0	0	-1	2.1739	-2	-4	6.5217	2.897	-0.912	-1	3
2	-2	1	-5	-2.647	-3	2.1739	2	15.217	0	21.739	0	0	-1	0	6.5217	8.6957	10.87	-1	0	17.391	1	0	0	0	19.565	13.043	1	4.3478	-3	0.945	-1	-3	0	0.44	0	1	1.399	8.6957	2.1739	1	-1	4.3478	5	3	6.5217	-0.146	0.816	0	4
2	-2	1	0	-0.837	-1	0	1	0	0	21.739	0	1	-2	1	4.3478	0	6.5217	-2	0	2.1739	-2	0	0	2.1739	2.1739	13.043	0	0	-2	-1.019	0	-1	0	1.266	0	0	-1.453	2.1739	0	0	1	0	1	0	2.1739	-3.242	0.816	-2	-1
2	-3	1	-4	2.064	0	6.5217	3	0	0	17.391	0	1	-2	1	15.217	4.3478	6.5217	-2	0	4.3478	0	0	0	39.13	4.3478	13.043	1	2.1739	-3	1.831	-2	-2	0	1.242	0	4	1.652	4.3478	0	0	-3	2.1739	-1	4	4.3478	-0.912	-1.262	2	-1
2	-1	0	-1	-1.392	-2	0	3	13.043	2	2.1739	0	1	-2	0	15.217	0	15.217	0	0	2.1739	5	-2	0	13.043	4.3478	4.3478	1	0	-2	1.831	1	1	0	1.242	0	2	2.081	10.87	4.3478	0	-1	2.1739	0	-2	4.3478	1.648	2.064	0	0
2	-2	1	-6	-1.262	3	2.1739	2	0	-2	0	0	0	-2	0	0	0	0	1	0	15.217	-3	-2	0	2.1739	19.565	10.87	0	13.043	3	-1.239	-2	2	1	-0.277	0	1	-0.279	10.87	23.913	0	-5	0	-2	-1	8.6957	0.816	1.648	-2	-3
2	2	1	-5	2.064	-1	0	4	0	3	4.3478	0	1	-2	0	0	13.043	0	-1	0	4.3478	-3	-2	0	39.13	0	4.3478	0	0	0	-1.337	1	-3	1	-0.277	0	3	1.652	0	4.3478	1	-1	2.1739	0	-3	2.1739	0.816	-0.146	0	-1
2	-1	1	1	0.816	2	0	-1	15.217	1	15.217	0	1	-1	0	32.609	13.043	6.5217	0	1	6.5217	-4	-1	0	4.3478	4.3478	6.5217	1	8.6957	-2	-0.663	1	-1	0	1.57	0	0	-0.547	4.3478	4.3478	1	3	10.87	-1	2	8.6957	-1.262	-0.912	5	1
2	-2	1	-4	-0.912	4	6.5217	1	2.1739	-1	17.391	1	1	-1	0	4.3478	6.5217	2.1739	2	1	2.1739	4	-2	0	2.1739	10.87	2.1739	1	10.87	-4	-1.006	1	2	0	1.266	0	4	-0.987	2.1739	0	0	4	6.5217	1	-2	17.391	-1.392	-1.262	-4	-1
2	-2	1	6	-0.078	-1	4.3478	2	6.5217	-1	2.1739	0	1	-1	0	0	0	6.5217	-4	1	4.3478	-2	-1	0	8.6957	4.3478	0	1	4.3478	0	-0.228	-2	3	0	-1.02	0	0	-0.417	4.3478	0	0	0	4.3478	-5	0	0	-2.647	2.064	1	0
2	0	1	-2	-1.392	-1	15.217	2	6.5217	-6	2.1739	0	1	-2	0	15.217	0	0	5	1	15.217	-1	0	0	13.043	8.6957	0	0	2.1739	-1	0.931	1	1	1	1.242	0	1	2.081	8.6957	10.87	0	-5	6.5217	1	-2	8.6957	2.064	2.064	-3	-3
2	-3	1	-4	-0.146	0	4.3478	3	21.739	-5	28.261	0	0	-3	1	0	15.217	10.87	-2	0	15.217	-2	-1	0	4.3478	2.1739	0	0	13.043	-3	-0.591	0	-3	0	0.67	0	1	-1.302	8.6957	13.043	0	0	2.1739	-2	-1	17.391	-1.262	0.412	1	-3
2	3	0	-5	-0.146	0	6.5217	4	6.5217	-1	0	0	1	-2	0	0	10.87	6.5217	0	0	4.3478	-2	0	0	4.3478	2.1739	6.5217	0	6.5217	1	-1.337	-2	-5	0	0.908	0	3	-1.302	2.1739	0	0	0	0	0	-2	0	-0.912	-2.647	0	-1
2	0	1	-2	-3.242	-2	17.391	3	0	1	15.217	1	0	-1	1	15.217	0	2.1739	-2	0	4.3478	2	0	1	2.1739	0	2.1739	1	4.3478	-1	1.357	-3	-4	1	1.242	1	0	0.302	2.1739	2.1739	0	-6	2.1739	-1	0	0	2.897	-0.912	-1	1
2	-2	1	-4	0.816	-1	0	4	0	-1	0	0	1	-1	1	2.1739	6.5217	2.1739	1	0	2.1739	5	-1	0	4.3478	8.6957	0	0	17.391	3	0.336	-1	0	0	0.421	0	6	-0.547	0	6.5217	0	0	13.043	-2	-2	17.391	-0.912	2.897	-2	-3
2	-1	1	1	0.816	7	15.217	5	13.043	0	2.1739	1	0	-5	0	4.3478	4.3478	2.1739	4	1	15.217	0	-3	0	4.3478	10.87	13.043	0	2.1739	-1	-1.337	1	-1	0	1.045	0	4	-0.547	15.217	0	0	2	2.1739	-3	-2	17.391	0.816	2.064	0	-2
2	-2	1	-2	-1.853	-6	10.87	2	0	0	4.3478	0	1	-4	0	6.5217	10.87	2.1739	-3	1	15.217	7	1	1	0	8.6957	0	1	0	-4	-1.239	-1	-2	1	0.44	0	1	-0.179	4.3478	0	0	-6	13.043	-3	0	17.391	2.064	-0.146	-2	-4
2	0	1	-4	-2.647	-1	2.1739	3	15.217	0	4.3478	0	0	1	1	4.3478	4.3478	6.5217	-2	1	6.5217	-6	1	0	0	2.1739	13.043	1	0	0	0.931	0	0	1	1.045	0	3	1.399	2.1739	4.3478	0	-6	0	-5	3	2.1739	1.313	-0.146	-2	-1
2	-1	1	-5	-0.146	-1	2.1739	1	2.1739	-1	4.3478	0	0	-2	0	0	4.3478	2.1739	2	0	17.391	4	-2	0	4.3478	2.1739	2.1739	0	13.043	1	-0.663	-1	-1	0	0.113	0	1	-1.302	15.217	6.5217	0	-5	6.5217	0	-3	17.391	-0.184	-0.146	2	-5
2	0	1	-4	2.064	-1	2.1739	5	2.1739	-6	2.1739	0	1	-3	0	0	2.1739	0	-4	1	15.217	-6	-1	0	39.13	19.565	2.1739	1	17.391	0	1.05	2	-2	1	-1.005	0	3	1.652	2.1739	23.913	1	-5	8.6957	0	-1	0	-2.647	2.064	1	2
2	-4	1	-3	-3.242	3	6.5217	2	0	-3	15.217	0	0	-2	0	15.217	4.3478	10.87	-5	0	4.3478	0	-1	0	2.1739	2.1739	17.391	0	0	-1	1.831	-2	-2	0	1.242	0	3	0.302	8.6957	4.3478	0	3	0	5	-1	4.3478	1.313	-0.912	1	-5
2	1	0	-6	-0.912	3	6.5217	1	0	-1	0	0	0	-2	0	0	0	0	-1	0	2.1739	-5	-2	0	2.1739	10.87	4.3478	0	4.3478	3	-0.032	-1	-4	1	-0.277	0	4	-0.987	0	4.3478	0	-5	4.3478	-4	0	2.1739	-0.146	-3.242	1	-4
2	-1	1	-4	-0.912	0	0	2	6.5217	3	17.391	0	0	-3	0	2.1739	13.043	6.5217	-2	0	4.3478	-6	0	0	2.1739	4.3478	2.1739	1	8.6957	4	-1.019	-3	-3	1	-0.259	0	3	-0.987	4.3478	6.5217	1	-5	2.1739	-5	1	8.6957	1.313	-1.262	1	-5
2	-1	1	-3	-3.242	0	2.1739	4	13.043	-1	0	0	0	-1	0	2.1739	6.5217	15.217	-3	0	2.1739	0	-2	0	2.1739	10.87	2.1739	0	13.043	3	1.357	0	0	0	-0.838	0	4	0.302	2.1739	2.1739	0	-4	4.3478	-2	-3	8.6957	0.412	-3.242	0	2
2	-2	1	-4	0.412	-1	2.1739	3	4.3478	3	2.1739	0	1	0	0	15.217	10.87	2.1739	1	1	15.217	-1	-1	0	2.1739	19.565	13.043	0	8.6957	-3	-1.239	-2	-3	0	1.242	0	3	-0.59	8.6957	0	1	-4	4.3478	-4	-2	17.391	1.313	2.064	-1	2
2	-5	1	-2	-0.146	-6	2.1739	3	0	1	21.739	1	1	-5	0	2.1739	4.3478	10.87	-1	0	4.3478	-6	-1	1	4.3478	0	6.5217	0	13.043	-6	-1.239	1	-3	0	-0.259	1	3	-1.302	15.217	23.913	0	2	4.3478	-6	-2	2.1739	-3.242	0.816	-2	-1
2	-2	1	-2	-0.837	-4	0	5	2.1739	1	4.3478	0	1	-1	0	15.217	6.5217	6.5217	1	0	6.5217	-5	-3	0	2.1739	4.3478	2.1739	0	4.3478	-3	-1.337	1	-5	1	1.242	0	6	-1.453	2.1739	2.1739	1	-1	19.565	-5	-4	2.1739	-2.647	-0.146	-1	4
2	-3	1	2	2.064	8	0	5	0	0	2.1739	1	1	-5	0	19.565	10.87	10.87	-2	1	0	1	-3	0	39.13	10.87	13.043	0	4.3478	-3	-1.239	1	-1	0	0.393	0	4	1.652	4.3478	0	0	0	2.1739	-5	-3	17.391	0.816	2.064	-3	-3
2	2	1	-4	1.512	-5	2.1739	-1	15.217	8	2.1739	0	1	-2	0	4.3478	0	6.5217	-5	1	17.391	3	-1	0	0	4.3478	6.5217	1	2.1739	-3	1.357	-4	0	0	1.266	0	1	0.83	4.3478	4.3478	0	0	19.565	-3	0	6.5217	-0.837	1.313	-2	-3
2	0	0	-2	-3.242	-1	2.1739	4	0	2	4.3478	0	1	5	0	6.5217	6.5217	6.5217	-3	0	2.1739	-6	-1	0	2.1739	0	0	1	8.6957	-3	-0.032	-4	-5	0	-0.397	0	1	0.302	4.3478	23.913	1	3	4.3478	-4	7	17.391	1.512	-0.146	0	-2
2	2	1	-5	-1.392	-4	2.1739	3	2.1739	-1	4.3478	0	1	-2	1	2.1739	2.1739	6.5217	-5	1	17.391	-6	0	0	13.043	4.3478	2.1739	1	2.1739	0	1.05	-4	-6	0	0.421	0	3	2.081	8.6957	2.1739	0	-5	10.87	-6	-1	0	1.648	-0.146	-2	8
2	0	1	-4	-1.392	-5	0	1	0	-4	0	0	1	-1	1	32.609	0	6.5217	-5	1	8.6957	-2	1	0	13.043	19.565	2.1739	0	6.5217	3	-1.337	2	-2	0	1.57	0	1	2.081	8.6957	6.5217	0	-7	4.3478	-5	-3	8.6957	-3.242	1.648	-4	-3
2	-1	1	-1	-0.255	-3	2.1739	2	0	-6	28.261	0	1	-1	1	0	10.87	13.043	-1	0	8.6957	-1	0	0	0	4.3478	2.1739	0	2.1739	-2	1.05	-4	-3	0	0.67	0	-1	0.465	10.87	4.3478	0	6	8.6957	-3	-2	8.6957	2.064	0.412	0	1
2	-1	1	-2	-0.912	-4	0	6	2.1739	-1	0	0	1	-1	1	6.5217	4.3478	6.5217	-3	0	6.5217	-5	-2	0	2.1739	2.1739	0	0	0	2	1.538	-1	3	0	-0.397	0	1	-0.987	2.1739	23.913	0	1	4.3478	-1	-3	2.1739	-3.242	-0.078	-1	-2
2	0	1	-1	-0.146	5	0	6	2.1739	-6	4.3478	0	0	-5	1	0	6.5217	10.87	-4	0	17.391	0	-3	0	4.3478	0	2.1739	0	6.5217	-3	-0.663	-4	-3	0	0.908	0	5	-1.302	2.1739	0	1	-4	0	7	-6	2.1739	-1.262	-0.146	2	-5
2	-2	1	2	2.064	-7	4.3478	8	2.1739	-4	2.1739	0	1	0	1	0	0	6.5217	-6	1	0	-3	-3	0	39.13	4.3478	0	1	17.391	2	-0.591	-2	-2	0	-1.005	0	0	1.652	4.3478	0	1	-5	0	-3	0	6.5217	2.064	-1.853	-4	-1
2	-3	1	-5	-2.647	2	2.1739	3	2.1739	-2	0	1	1	-2	1	2.1739	8.6957	6.5217	0	1	0	-1	-1	0	0	0	4.3478	1	2.1739	1	-1.337	-4	-4	1	-0.838	0	2	1.399	8.6957	23.913	0	-6	13.043	-3	-5	8.6957	-1.262	-0.078	-5	-4
2	-3	1	-6	-0.837	-5	0	4	4.3478	0	17.391	0	0	-1	1	4.3478	4.3478	0	-1	0	2.1739	-6	-1	1	2.1739	0	13.043	1	2.1739	-5	1.831	-3	-4	0	1.045	1	2	-1.453	4.3478	0	0	-2	4.3478	-1	-4	2.1739	2.064	-1.262	-3	2
2	-3	0	-5	-1.262	-1	15.217	0	15.217	-6	2.1739	1	0	3	0	0	0	0	4	0	2.1739	-4	-1	1	2.1739	4.3478	4.3478	1	4.3478	-4	-1.019	-1	-3	1	-0.277	1	3	-0.279	0	6.5217	0	-6	4.3478	-5	2	4.3478	1.313	-1.392	-2	2
2	-3	1	-4	-1.262	4	2.1739	3	2.1739	-5	2.1739	1	1	-1	0	4.3478	13.043	2.1739	3	1	2.1739	-1	-2	0	2.1739	2.1739	0	1	6.5217	-5	1.05	-1	0	0	1.266	0	4	-0.279	4.3478	2.1739	0	-2	4.3478	-4	4	6.5217	-1.262	2.064	-4	7
2	-3	1	-5	-0.837	-3	6.5217	4	0	-1	2.1739	0	0	-3	1	2.1739	0	2.1739	-1	1	4.3478	-3	-2	0	2.1739	4.3478	2.1739	0	2.1739	-4	1.538	2	-2	0	0.421	0	6	-1.453	0	0	0	-1	4.3478	-3	-4	0	0.412	2.064	1	3
2	-5	1	-5	-3.242	-5	0	4	0	-3	15.217	0	1	-4	1	4.3478	6.5217	0	-2	1	6.5217	0	-1	1	2.1739	2.1739	0	0	13.043	-5	0.26	-3	-2	0	1.045	0	3	0.302	0	10.87	0	0	8.6957	-5	-4	0	2.897	-0.912	-3	-4
2	0	1	-2	0.412	0	0	2	0	1	0	0	1	0	0	4.3478	15.217	0	-3	1	0	0	-2	0	2.1739	0	0	0	2.1739	4	0	-3	0	0	1.266	0	2	-0.59	0	2.1739	0	0	0	-6	-3	0	1.512	2.897	-4	7
2	-4	1	1	1.648	-5	0	3	0	-2	2.1739	0	0	0	1	6.5217	2.1739	0	-5	1	0	0	-1	0	8.6957	0	0	0	13.043	-3	0	-5	0	0	0.44	0	0	-0.561	0	0	0	0	4.3478	0	0	0	-1.853	1.512	-3	2
2	-5	1	-6	1.212	-6	10.87	6	8.6957	0	21.739	1	0	-4	1	2.1739	0	10.87	0	0	4.3478	-1	-2	1	0	4.3478	0	0	0	-6	-1.239	0	5	0	-0.259	1	5	-1.524	2.1739	4.3478	0	2	0	-6	0	17.391	0.933	0.816	-2	-3
[truncated: 231 more columns]
