# Supplementary material for: Prediction of carbamylated lysine sites based on the one-class k -nearest neighbor method
Source: Royal Society of Chemistry journal article supplement (doi:10.1039/c3mb70195f), 2013-08-13
Supplement: c3mb70195f_4.xlsx [file c3mb70195f_4.xlsx]

## Sheet: Sheet1
proteins	acetylation site
A0AUZ9	848
A0AUZ9	859
A2RRP1	1057
A3KN83	1222
A3KN83	149
A3KN83	413
A6NHR9	1349
A6NIH7	24
A8CG34	714
A8MVJ9	28
B1AL46	649
O00116	102
O00116	169
O00116	347
O00154	168
O00154	198
O00154	283
O00154	78
O00159	285
O00159	647
O00159	704
O00193	174
O00193	179
O00203	592
O00231	417
O00232	221
O00232	368
O00232	448
O00257	149
O00267	328
O00303	238
O00330	194
O00479	82
O00541	98
O00566	609
O00571	118
O00746	91
O08749	127
O14497	1612
O14497	1905
O14548	69
O14561	92
O14578	1721
O14628	408
O14686	2246
O14686	2468
O14686	3155
O14686	3433
O14686	4465
O14686	4516
O14686	4776
O14686	5276
O14734	318
O14734	52
O14737	63
O14744	200
O14787	862
O14802	445
O14818	227
O14874	184
O14874	192
O14874	233
O14874	245
O14964	207
O14972	131
O14979	216
O14980	446
O14980	455
O14980	693
O15027	444
O15042	760
O15084	73
O15091	512
O15105	64
O15105	70
O15117	149
O15117	265
O15117	3
O15117	425
O15143	44
O15143	82
O15144	275
O15144	295
O15145	56
O15145	61
O15212	21
O15212	66
O15228	643
O15355	383
O15382	321
O15382	377
O15530	304
O23629	12
O23629	28
O23629	33
O23629	39
O23629	40
O23629	7
O35488	291
O35488	325
O43143	132
O43143	488
O43149	2667
O43169	30
O43172	27
O43264	777
O43295	220
O43295	222
O43295	224
O43298	247
O43324	12
O43324	138
O43324	166
O43361	539
O43390	103
O43390	366
O43390	389
O43390	397
O43448	315
O43463	266
O43592	634
O43684	179
O43707	114
O43707	214
O43707	417
O43707	592
O43707	625
O43708	32
O43747	144
O43765	137
O43768	63
O43776	244
O43809	189
O43809	23
O43809	29
O43809	56
O43809	73
O43813	142
O43815	689
O43823	538
O43837	146
O43837	199
O43837	374
O60234	119
O60256	251
O60264	440
O60281	1117
O60292	1448
O60306	1051
O60306	576
O60313	228
O60315	377
O60343	477
O60488	89
O60563	390
O60563	492
O60566	250
O60573	134
O60610	1057
O60610	1103
O60645	39
O60664	65
O60701	107
O60701	173
O60701	434
O60739	58
O60739	61
O60762	197
O60763	202
O60841	784
O60841	923
O60869	123
O60880	89
O60885	1111
O75027	216
O75027	251
O75083	115
O75083	28
O75083	480
O75083	81
O75083	95
O75152	764
O75155	1173
O75165	84
O75323	148
O75347	28
O75376	1336
O75376	1412
O75381	34
O75390	327
O75390	366
O75390	375
O75390	382
O75390	393
O75391	166
O75396	38
O75400	196
O75400	680
O75417	990
O75446	104
O75477	267
O75496	27
O75521	51
O75521	92
O75528	418
O75533	141
O75533	554
O75533	562
O75534	81
O75586	236
O75586	241
O75592	1790
O75592	2422
O75643	1176
O75643	469
O75663	106
O75663	207
O75689	272
O75717	1127
O75717	962
O75791	106
O75879	181
O75914	535
O75937	146
O75940	219
O75947	117
O75947	149
O75947	85
O75947	95
O75964	24
O76021	468
O76031	178
O76031	437
O88554	36
O88554	37
O94759	1104
O94759	405
O94776	152
O94822	259
O94826	185
O94826	470
O94874	571
O94906	585
O94919	407
O94925	311
O94953	602
O94973	35
O94992	165
O95081	173
O95104	49
O95140	243
O95202	597
O95218	54
O95232	166
O95232	231
O95232	78
O95251	199
O95298	114
O95319	458
O95336	180
O95347	114
O95347	1158
O95347	1160
O95347	222
O95347	677
O95352	306
O95359	2884
O95363	202
O95433	212
O95433	3
O95453	220
O95453	499
O95456	264
O95470	353
O95571	172
O95571	66
O95696	368
O95696	418
O95696	516
O95696	519
O95696	523
O95696	903
O95749	25
O95758	257
O95758	264
O95758	423
O95758	549
O95786	858
O95786	909
O95801	227
O95816	111
O95831	295
O95983	109
O95983	141
O95983	4
O96011	43
O96028	779
O96028	781
P00042	6
P00186	288
P00216	119
P00367	480
P00367	503
P00367	84
P00387	42
P00441	123
P00452	283
P00491	95
P00505	150
P00505	159
P00505	234
P00505	296
P00505	396
P00505	404
P00505	73
P00505	90
P00519	711
P00558	11
P00558	131
P00558	146
P00558	199
P00558	267
P00558	291
P00558	30
P00558	323
P00558	406
P00558	48
P00558	75
P00558	86
P00558	97
P00813	232
P00813	54
P00946	280
P00956	183
P00957	74
P00966	165
P01106	143
P01106	148
P01106	157
P01106	275
P01106	317
P01106	323
P01106	371
P02299	15
P02299	19
P02299	24
P02309	17
P02309	6
P02309	9
P02358	93
P02489	145
P02489	70
P02489	78
P02489	88
P02545	108
P02545	114
P02545	270
P02545	311
P02545	417
P02545	450
P02545	97
P02792	98
P02795	51
P03070	697
P03928	49
P04075	108
P04075	13
P04075	330
P04075	42
P04080	78
P04080	91
P04114	2004
P04179	130
P04179	68
P04406	186
P04406	194
P04406	219
P04406	227
P04406	254
P04406	61
P04424	288
P04424	69
P04608	50
P04608	51
P04632	179
P04637	292
P04637	305
P04637	373
P04637	381
P04637	382
P04792	123
P04843	187
P05114	14
P05114	82
P05129	197
P05198	141
P05387	21
P05387	49
P05388	77
P05455	116
P05455	128
P05455	328
P05455	360
P05556	794
P05783	111
P05783	131
P05783	167
P05783	426
P06213	1112
P06239	179
P06400	548
P06400	896
P06454	15
P06576	133
P06576	198
P06576	426
P06576	485
P06733	126
P06733	193
P06733	199
P06733	228
P06733	233
P06733	256
P06733	281
P06733	285
P06733	406
P06733	420
P06733	5
P06733	60
P06733	64
P06733	71
P06733	89
P06744	12
P06744	142
P06748	150
P06748	154
P06748	212
P06748	257
P06748	267
P06748	273
P06748	32
P06753	12
P06959	396
P07195	119
P07195	319
P07195	329
P07195	58
P07195	7
P07384	84
P07737	105
P07737	108
P07741	114
P07814	1156
P07814	1503
P07814	300
P07814	417
P07814	498
P07814	535
P07814	542
P07814	637
P07814	788
P07900	224
P07900	410
P07900	443
P07900	458
P07900	489
P07900	576
P07900	585
P07910	170
P07910	216
P07910	39
P07919	85
P07954	256
P07954	292
P07954	66
P07954	80
P07954	94
P08047	703
P08133	299
P08133	306
P08133	370
P08133	418
P08133	483
P08133	607
P08133	620
P08133	63
P08133	68
P08133	75
P08133	81
P08200	142
P08243	385
P08249	157
P08249	239
P08249	314
P08559	321
P08559	336
P08559	77
P08559	83
P08567	64
P08621	118
P08621	162
P08708	19
P08865	52
P09012	60
P09204	40
P09211	121
P09211	128
P09234	52
P09373	117
P09373	124
P09373	195
P09373	454
P09373	541
P09373	591
P09373	63
P09382	29
P09424	269
P09601	39
P09661	172
P09874	105
P09874	131
P09874	600
P09874	621
P09874	97
P09960	337
P09960	414
P09960	573
P09960	73
P0A6K6	287
P0A6L0	167
P0A705	808
P0A799	84
P0A7J3	105
P0A7J3	37
P0A7M9	8
P0A7R1	89
P0A7S3	108
P0A805	162
P0A825	250
P0A825	285
P0A825	354
P0A825	375
P0A825	54
P0A853	115
P0A853	156
P0A853	450
P0A853	5
P0A894	251
P0A8G6	50
P0A8T7	983
P0A8V2	1022
P0A8V2	1200
P0A991	208
P0A991	262
P0A9Q7	358
P0AA25	70
P0AB71	9
P0AB89	366
P0AB89	94
P0AB91	244
P0ABH7	283
P0ABP8	27
P0ACJ8	101
P0AD49	66
P0ADG7	267
P0ADG7	428
P0ADN2	15
P0AE08	153
P0AE08	169
P0AE08	17
P0AE08	171
P0AE08	93
P0AE67	109
P0AE67	92
P0AEH5	35
P0AET2	93
P0AF36	10
P0AF96	36
P0AFG6	148
P0AFG8	716
P0AG27	91
P0AG55	44
P0AG67	229
P0AG67	279
P0AG67	363
P0AG84	39
P0AGJ9	144
P0C0L2	16
P0C7P0	55
P0CG48	48
P0CG48	6
P10155	224
P10155	359
P10242	471
P10242	480
P10243	394
P10515	466
P10599	3
P10599	39
P10599	94
P10606	121
P10768	200
P10768	278
P10768	39
P10809	125
P10809	130
P10809	202
P10809	218
P10809	269
P10809	31
P10809	352
P10809	359
P10809	396
P10809	469
P10809	473
P10809	523
P10809	82
P11172	162
P11182	295
P11217	316
P11310	212
P11310	279
P11310	301
P11352	146
P11387	280
P11413	171
P11413	386
P11413	403
P11413	432
P11413	497
P11413	514
P11413	89
P11441	48
P11441	54
P11498	1090
P11588	158
P11717	2352
P11725	231
P11725	238
P11725	88
P11766	366
P12004	248
P12004	77
P12004	80
P12081	443
P12268	511
P12270	252
P12270	312
P12270	345
P12270	428
P12270	457
P12270	713
P12270	723
P12270	748
P12270	755
P12956	31
P12956	331
P12956	338
P12956	461
P12956	468
P13010	144
P13010	195
P13010	265
P13010	332
P13010	660
P13010	665
P13051	295
P13051	5
P13073	53
P13073	60
P13639	235
P13639	239
P13639	272
P13639	275
P13639	318
P13639	445
P13639	857
P13667	366
P13693	93
P13796	294
P13796	297
P13796	361
P13796	472
P13796	542
P13796	579
P13796	76
P13796	88
P13984	137
P13984	22
P13984	33
P13995	50
P14174	78
P14316	75
P14316	78
P14317	123
P14317	192
P14317	241
P14317	41
P14324	123
P14324	353
P14407	192
P14635	73
P14735	308
P14866	269
P14866	475
P14866	552
P14868	374
P14868	74
P14921	15
P14921	2
P14921	305
P14921	8
P14927	78
P15056	418
P15153	147
P15288	296
P15311	139
P15311	60
P15498	222
P15498	252
P15498	716
P15559	262
P15559	59
P15639	287
P15692	147
P15692	149
P15692	152
P15880	263
P15880	275
P16014	151
P16401	109
P16401	168
P16401	209
P16401	93
P16615	464
P16949	100
P16949	119
P16949	128
P16949	80
P16949	9
P16949	95
P17020	487
P17096	15
P17516	270
P17516	75
P17706	312
P17706	38
P17812	100
P17844	32
P17844	33
P17844	40
P17987	199
P17987	400
P17987	532
P18077	8
P18085	36
P18124	124
P18124	161
P18124	29
P18124	31
P18163	633
P18206	173
P18206	496
P18583	16
P18583	2055
P18583	288
P18859	105
P18859	41
P18859	46
P18859	99
P19338	102
P19338	116
P19338	124
P19338	132
P19338	318
P19338	333
P19338	377
P19338	398
P19338	403
P19338	513
P19338	572
P19338	577
P19338	646
P19338	9
P20042	265
P20042	293
P20618	204
P20810	629
P21108	194
P21333	1538
P21333	2607
P21333	2621
P21333	504
P21333	508
P21333	700
P21333	781
P21333	837
P21333	891
P21333	994
P21359	1581
P21499	544
P21579	237
P21599	351
P21673	26
P21953	241
P22059	103
P22087	205
P22102	350
P22234	247
P22234	53
P22259	523
P22259	87
P22307	132
P22307	183
P22307	438
P22307	470
P22314	671
P22314	980
P22681	197
P22694	267
P23193	84
P23246	319
P23246	338
P23246	421
P23246	472
P23368	156
P23368	224
P23368	240
P23368	272
P23368	346
P23396	62
P23443	304
P23497	733
P23526	408
P23528	13
P23528	132
P23528	144
P23528	19
P23528	73
P23588	586
P23743	484
P23786	510
P23786	544
P23919	169
P23921	17
P23921	376
P24539	221
P24539	233
P24666	156
P24752	174
P24752	181
P24752	251
P24752	263
P24752	83
P25500	635
P25500	644
P25500	730
P25500	734
P25685	44
P25688	118
P25688	122
P25688	164
P25688	185
P25688	220
P25688	227
P25688	277
P25688	290
P25688	36
P25688	55
P25705	161
P25705	261
P25705	305
P25705	434
P25705	498
P25705	506
P25705	539
P25787	171
P25787	70
P25788	110
P25788	206
P25788	230
P25788	238
P25788	57
P25789	127
P25789	176
P25789	238
P26232	889
P26358	1113
P26358	1115
P26358	1117
P26358	173
P26368	462
P26368	70
P26373	16
P26373	177
P26447	35
P26447	7
P26639	243
P26640	420
P26640	423
P26640	645
P26641	132
P26641	147
P26641	434
P27635	121
P27635	208
P27694	163
P27694	167
P27694	259
P27695	197
P27695	27
P27695	31
P27695	32
P27695	35
P27695	6
P27695	7
P27708	1411
P27708	747
P27797	159
P27797	209
P27797	48
P27824	137
P27986	530
P28065	109
P28065	53
P28288	260
P28288	399
P28328	84
P28340	1007
P28715	8
P28838	221
P29083	67
P29144	708
P29217	80
P29401	11
P29401	144
P29401	204
P29401	232
P29401	241
P29401	260
P29401	314
P29401	597
P29401	6
P29401	603
P29692	107
P29692	117
P29692	17
P29728	378
P29728	433
P29996	72
P30041	209
P30041	63
P30042	164
P30044	83
P30048	91
P30050	54
P30084	118
P30085	55
P30153	280
P30533	287
P30566	147
P30566	295
P30613	348
P30740	137
P30740	177
P30838	178
P30838	194
P30838	269
P30838	3
P31040	179
P31040	335
P31040	541
P31040	547
P31040	608
P31153	81
P31314	236
P31689	44
P31689	66
P31930	111
P31939	199
P31948	100
P31948	246
P31948	301
P31948	312
P31948	325
P31948	344
P31948	388
P31948	446
P31948	68
P31948	73
P31948	8
P31949	3
P32969	121
P33176	166
P33221	179
P33241	327
P33316	179
P33552	4
P33570	342
P33991	220
P33991	450
P33992	392
P33992	396
P33992	696
P34897	103
P34897	181
P34897	196
P34897	269
P34897	297
P34897	356
P34897	464
P34897	469
P34897	474
P34913	43
P35249	13
P35249	6
P35250	163
P35250	304
P35251	634
P35269	407
P35340	354
P35340	53
P35558	594
P35558	70
P35558	71
P35580	1247
P35580	1645
P35580	442
P35580	552
P35606	318
P35606	627
P35658	143
P35659	326
P35914	48
P35998	116
P35998	422
P36542	154
P36542	197
P36542	55
P36552	360
P36578	106
P36578	14
P36578	333
P36871	16
P36871	419
P36873	147
P36957	267
P36969	47
P37837	219
P37837	269
P37837	286
P37837	321
P38159	30
P38646	135
P38646	138
P38646	143
P38646	234
P38646	288
P38646	300
P38646	345
P38646	567
P38646	646
P38919	296
P38919	321
P38919	60
P39019	111
P39019	23
P39019	77
P39023	294
P39023	366
P39023	373
P39748	267
P39748	354
P39748	375
P39748	377
P39748	380
P39748	80
P40227	10
P40227	199
P40227	365
P40227	377
P40227	388
P40227	5
P40261	39
P40429	191
P40925	103
P40925	118
P40925	298
P40938	20
P40939	295
P40939	303
P40939	353
P40939	359
P40939	406
P40939	505
P40939	540
P40939	644
P41162	388
P41212	11
P41212	302
P41223	125
P41250	204
P41250	219
P41250	501
P41252	844
P42126	283
P42126	89
P42166	656
P42285	198
P42285	379
P42285	51
P42285	748
P42285	796
P42345	1218
P42574	82
P42677	5
P42704	155
P42704	187
P42704	292
P42704	613
P42704	726
P42704	750
P42704	864
P42765	137
P42765	181
P42765	25
P42765	81
P42766	19
P42766	43
P42858	176
P42858	234
P42858	343
P42858	442
P42858	9
P43034	53
P43155	261
P43155	268
P43243	3
P43243	473
P43243	522
P43243	571
P43243	836
P43246	555
P43246	635
P43304	634
P43403	603
P43605	223
P45954	284
P45974	184
P45983	308
P46013	1639
P46013	2005
P46013	2264
P46063	193
P46063	206
P46063	514
P46063	522
P46087	649
P46099	270
P46099	284
P46100	967
P46439	126
P46674	748
P46776	110
P46776	47
P46776	55
P46777	48
P46777	5
P46779	101
P46781	155
P46782	47
P46821	506
P46926	64
P47037	112
P47037	113
P47736	262
P47736	384
P47755	273
P47755	86
P47755	97
P47756	235
P47897	309
P47897	620
P47914	33
P47914	82
P48047	162
P48047	172
P48047	192
P48047	54
P48047	60
P48047	70
P48147	157
P48444	233
P48444	309
P48507	263
P48634	1196
P48634	27
P48643	223
P48643	232
P48643	399
P48729	8
P48735	106
P48735	133
P48735	155
P48735	166
P48735	180
P48735	256
P48735	263
P48735	272
P48735	275
P48735	282
P48735	442
P48735	67
P48735	80
P48739	215
P48739	5
P49189	298
P49207	36
P49321	33
P49327	1704
P49327	1752
P49327	1771
P49327	1847
P49327	1995
P49327	298
P49327	436
P49327	528
P49327	673
P49327	70
P49368	222
P49411	256
P49411	418
P49411	79
P49411	88
P49454	2875
P49458	30
P49458	52
P49585	8
P49588	19
P49588	876
P49589	503
P49591	323
P49715	161
P49720	77
P49721	185
P49721	68
P49736	216
P49736	896
P49753	104
P49773	21
P49773	30
P49790	384
P49790	718
P49790	954
P49792	115
P49915	416
P49915	9
P49916	316
P50148	102
P50171	66
P50213	343
P50226	106
P50395	112
P50395	269
P50440	385
P50544	240
P50544	277
P50552	283
P50570	598
P50579	427
P50851	2116
P50851	2117
P50914	71
P50914	79
P50914	85
P50990	20
P50990	318
P50990	400
P50990	466
P50990	7
P50991	139
P50991	288
P50991	302
P50991	319
P50991	326
P50991	489
P50995	248
P50995	255
P50995	479
P51398	175
P51398	207
P51532	188
P51532	455
P51580	58
P51608	449
P51610	2005
P51610	288
P51610	813
P51610	836
P51649	126
P51649	358
P51659	565
P51659	669
P51659	707
P51665	204
P51665	214
P51692	701
P51784	245
P51825	681
P51858	44
P51991	134
P51991	148
P51991	151
P51991	29
P52196	136
P52209	154
P52209	309
P52209	38
P52209	59
P52209	76
P52272	277
P52272	698
P52298	151
P52306	230
P52306	421
P52503	112
P52564	82
P52565	105
P52565	127
P52565	141
P52565	178
P52597	224
P52597	87
P52630	375
P52655	12
P52697	287
P52701	504
P52701	70
P52732	146
P52756	542
P52758	101
P52943	138
P52948	603
P53004	248
P53004	253
P53007	160
P53007	255
P53007	97
P53026	106
P53396	1077
P53396	546
P53396	554
P53396	86
P53396	948
P53396	962
P53396	968
P53396	978
P53597	54
P53674	160
P53674	6
P53992	1087
P53999	35
P53999	68
P54132	1411
P54132	863
P54136	205
P54136	60
P54259	641
P54577	197
P54577	206
P54577	272
P54577	474
P54577	482
P54577	490
P54578	291
P54578	313
P54578	449
P54619	264
P54646	69
P54727	45
P54819	14
P55008	11
P55060	158
P55060	574
P55060	824
P55081	340
P55209	116
P55786	48
P55854	41
P55854	44
P55884	209
P55884	288
P55884	364
P55884	436
P56192	726
P56378	14
P56381	21
P56395	19
P56937	321
P56962	41
P57076	283
P57721	55
P57737	472
P58546	11
P58546	24
P58546	4
P58546	97
P59998	35
P59998	89
P60174	225
P60174	231
P60174	275
P60174	51
P60228	275
P60422	242
P60484	6
P60520	24
P60660	50
P60660	81
P60849	17
P60900	102
P60900	104
P60903	23
P60903	28
P60903	37
P60903	54
P60903	57
P61011	81
P61081	3
P61158	240
P61158	244
P61158	251
P61158	254
P61160	299
P61160	322
P61221	121
P61221	191
P61221	210
P61221	349
P61221	431
P61244	153
P61244	154
P61247	249
P61247	34
P61254	77
P61289	195
P61313	83
P61326	114
P61353	117
P61353	128
P61353	27
P61353	93
P61604	56
P61604	70
P61604	86
P61604	99
P61758	59
P61922	318
P61927	10
P61964	112
P61970	4
P62081	169
P62081	74
P62191	258
P62244	124
P62249	60
P62256	60
P62256	64
P62258	118
P62258	123
P62258	50
P62258	69
P62266	135
P62269	106
P62269	78
P62269	8
P62269	94
P62273	48
P62277	27
P62277	39
P62280	38
P62280	45
P62312	59
P62328	12
P62328	26
P62328	32
P62328	39
P62328	4
P62399	3
P62424	217
P62424	34
P62424	97
P62633	103
P62701	120
P62701	134
P62750	70
P62753	211
P62753	30
P62826	159
P62826	60
P62826	71
P62826	99
P62847	37
P62851	52
P62851	60
P62851	66
P62851	94
P62854	113
P62854	66
P62888	26
P62899	75
P62913	159
P62913	52
P62913	85
P62917	46
P62993	109
P62993	50
P62993	6
P63162	8
P63167	36
P63173	67
P63173	9
P63220	81
P63241	47
P63241	68
P63244	130
P63279	65
P63284	176
P63284	640
P63284	96
P67870	212
P67910	267
P68036	131
P68036	138
P68036	9
P68066	48
P68066	88
P68066	92
P68400	102
P69797	234
P69797	55
P69910	446
P69910	453
P69910	464
P76046	249
P76558	56
P76658	179
P77454	294
P78316	772
P78318	241
P78356	150
P78371	13
P78371	154
P78371	181
P78417	122
P78417	143
P78417	148
P78417	152
P78417	57
P78527	1057
P78527	117
P78527	1209
P78527	1970
P78527	2259
P78527	254
P78527	3241
P78527	3260
P78527	3608
P78527	3621
P78527	3638
P78527	3642
P78527	828
P78527	832
P81605	68
P82094	519
P82650	211
P82650	255
P82650	258
P82933	287
P82979	142
P83731	27
P83731	77
P83731	93
P84090	12
P84098	80
P86790	170
P98175	383
Q00325	209
Q00325	214
Q00325	99
Q00534	264
Q00534	43
Q00577	273
Q00610	1441
Q00610	1501
Q00610	637
Q00610	856
Q00688	160
Q00688	170
Q01082	1815
Q01082	1913
Q01082	1989
Q01082	90
Q01085	122
Q01094	117
Q01094	120
Q01094	125
Q01105	132
Q01105	150
Q01105	172
Q01105	83
Q01130	36
Q01196	24
Q01196	43
Q01433	516
Q01469	17
Q01518	209
Q01518	81
Q01581	246
Q01581	273
Q01581	321
Q01581	46
Q01813	395
Q01813	486
Q01813	688
Q01826	136
Q01995	17
Q02218	970
Q02790	274
Q02790	282
Q02878	210
Q02878	239
Q02878	5
Q02880	365
Q02880	367
Q02880	373
Q02880	992
Q02978	73
Q03111	252
Q03135	5
Q03164	1130
Q03164	1235
Q03164	636
Q03701	695
Q04206	310
Q04446	68
Q04637	1095
Q04637	1188
Q04727	237
Q04727	281
Q04759	384
Q04760	148
Q04837	113
Q05066	136
Q05639	179
Q05639	439
Q05823	684
Q05D32	26
Q05D32	57
Q06124	280
Q06203	81
Q06265	297
Q07020	154
Q07021	91
Q07666	175
Q07960	212
Q07960	80
Q08211	1024
Q08211	191
Q08211	199
Q08257	208
Q08257	23
Q08426	165
Q08426	171
Q08426	346
Q08426	584
Q08881	296
Q08945	233
Q08945	33
Q08945	413
Q08945	90
Q09028	4
Q09161	204
Q09161	698
Q09666	4787
Q10567	318
Q10713	299
Q12158	210
Q12788	26
Q12830	880
Q12872	315
Q12874	92
Q12882	384
Q12904	33
Q12906	100
Q12906	460
Q12906	81
Q13011	318
Q13011	327
Q13011	83
Q13011	95
Q13045	21
Q13085	1334
Q13085	1580
Q13098	467
Q13112	494
Q13123	386
Q13123	408
Q13123	83
Q13123	98
Q13185	10
Q13185	44
Q13185	50
Q13247	101
Q13263	266
Q13263	304
Q13263	340
Q13263	377
Q13263	770
Q13263	774
Q13283	376
Q13310	104
Q13310	108
Q13315	3016
Q13347	264
Q13356	482
Q13415	326
Q13423	100
Q13423	331
Q13423	397
Q13423	70
Q13428	1414
Q13428	155
Q13428	296
Q13428	600
Q13428	755
Q13435	275
Q13442	132
Q13464	647
Q13485	37
Q13485	428
Q13485	507
Q13523	358
Q13523	717
Q13526	46
Q13564	6
Q13573	115
Q13576	1471
Q13576	1474
Q13596	237
Q13617	393
Q13630	147
Q13733	45
Q13765	108
Q13765	142
Q13796	1341
Q13813	1519
Q13813	2052
Q13813	2421
Q13813	592
Q13813	613
Q13813	637
Q13813	779
Q13838	188
Q13838	36
Q13838	53
Q13867	391
Q13868	165
Q13895	15
Q13907	176
Q13951	11
Q14004	556
Q14008	48
Q14019	102
Q14019	126
Q14119	362
Q14139	386
Q14141	196
Q14141	367
Q14151	424
Q14151	429
Q14151	616
Q14152	68
Q14186	3
Q14202	645
Q14203	230
Q14204	1125
Q14204	3480
Q14204	371
Q14204	394
Q14204	4283
Q14204	754
Q14207	1228
Q14232	35
Q14247	198
Q14247	218
Q14247	235
Q14247	272
Q14247	304
Q14247	309
Q14247	87
Q14258	273
Q14258	320
Q14258	567
Q14318	348
Q14566	599
Q14566	775
Q14571	608
Q14676	1402
Q14676	812
Q14683	282
Q14683	437
Q14683	536
Q14683	648
Q14683	713
Q14684	652
Q14687	496
Q14687	739
Q14739	190
Q14739	55
Q14739	594
Q14739	601
Q147X3	233
Q14814	245
Q14847	128
Q14847	42
Q14974	211
Q14974	835
Q14974	867
Q14978	33
Q14978	415
Q14978	663
Q14980	1511
Q14980	379
Q14980	891
Q14BN4	29
Q14C86	238
Q15003	637
Q15005	169
Q15005	191
Q15006	255
Q15024	116
Q15027	274
Q15031	236
Q15046	141
Q15046	402
Q15046	88
Q15052	751
Q15056	245
Q15149	187
Q15149	2841
Q15149	3091
Q15149	3420
Q15154	399
Q15185	33
Q15185	7
Q15257	337
Q15257	62
Q15269	700
Q15276	282
Q15283	208
Q15283	209
Q15283	211
Q15283	213
Q15287	218
Q15291	281
Q15293	86
Q15369	32
Q15393	109
Q15393	126
Q15437	320
Q15459	251
Q15459	55
Q15554	169
Q15555	271
Q15596	636
Q15596	640
Q15596	780
Q15596	785
Q15631	187
Q15631	199
Q15648	1177
Q15648	1354
Q15648	15
Q15648	1529
Q15652	552
Q15796	19
Q15811	495
Q15813	451
Q15813	463
Q15819	72
Q15942	279
Q16181	186
Q16181	213
Q16186	21
Q16222	180
Q16352	290
Q16512	448
Q16518	113
Q16531	1067
Q16531	153
Q16543	154
Q16543	240
Q16543	330
Q16543	45
Q16543	78
Q16566	190
Q16594	108
Q16594	5
Q16629	185
Q16629	24
Q16658	471
Q16666	214
Q16698	230
Q16718	30
Q16718	60
Q16740	211
Q16775	229
Q16836	179
Q16836	185
Q16836	202
Q16836	241
Q16836	312
Q16851	438
Q16854	275
Q16854	56
Q16881	239
Q16881	405
Q16891	211
Q16891	222
Q16891	451
Q1KMD3	471
Q2KHR2	607
Q32P41	344
Q32P41	348
Q3L8U1	499
Q3MHD2	168
Q3SY17	153
Q3SY69	903
Q49A26	25
Q4G0J3	574
Q4G176	439
Q4VC31	100
Q4VC31	83
Q53ET0	228
Q53FA7	321
Q53GL7	916
Q53GS9	428
Q53H12	6
Q53H82	247
Q53QZ3	118
Q53R41	360
Q53T59	337
Q53T94	440
Q56VL3	41
Q5BKZ1	247
Q5FW57	83
Q5JPH6	486
Q5SQI0	233
Q5SRE5	38
Q5SSJ5	190
Q5T0W9	418
Q5T1M5	92
Q5T3J3	290
Q5T4S7	1084
Q5T8P6	510
Q5T9A4	135
Q5T9A4	427
Q5TBB1	264
Q5TBB1	295
Q5TFE4	171
Q5THJ4	3523
Q5UIP0	1274
Q5VIR6	110
Q5VIR6	360
Q5VTL8	227
Q5VTR2	348
Q5VUA4	1275
Q5VW32	283
Q5VW36	819
Q5VWG9	266
Q5VWG9	776
Q60932	237
Q60932	33
Q60932	41
Q60932	74
Q61412	11
Q61694	362
Q61694	42
Q61694	60
Q62270	265
Q62425	56
Q62452	348
Q64458	252
Q68D10	582
Q68DK7	353
Q68EM7	295
Q6DN03	13
Q6DN03	16
[truncated: 903 more rows]

## Sheet: Sheet2
proteins	sumoylation site
B7ZR65	365
B7ZR65	61
O00257	494
O15265	257
O15350	627
O15525	14
O35346	152
O35625	858
O35625	861
O60315	391
O60315	866
O75030	289
O75030	423
O75626	816
O75643	1071
O75643	1199
O75643	2091
O75643	944
O80982	315
O95600	67
P02545	201
P03169	450
P04150	277
P04150	293
P04637	386
P06401	388
P06401	531
P06401	7
P06748	230
P06748	263
P07910	250
P08047	16
P10275	386
P10275	520
P10276	166
P10276	171
P10276	399
P10914	275
P10914	299
P11387	117
P11978	1128
P13297	127
P13297	9
P14316	137
P14316	166
P14316	293
P15873	127
P15873	164
P15976	137
P16220	285
P16220	304
P17302	144
P17302	237
P17544	118
P17676	174
P17844	53
P19419	230
P19419	249
P19419	254
P19544	177
P19544	73
P19793	108
P19893	175
P19893	180
P20263	118
P21538	807
P22460	221
P22460	536
P25963	21
P27694	449
P27694	577
P27815	358
P29373	102
P29590	160
P29590	490
P29590	65
P32457	11
P32457	287
P32457	30
P32457	4
P32457	63
P32458	412
P35398	273
P35520	211
P35712	404
P35712	417
P35719	137
P37275	347
P37275	774
P38904	1154
P38904	981
P41277	64
P42260	886
P43268	226
P43268	260
P43268	96
P46061	526
P46099	56
P47743	882
P48432	247
P49137	353
P49716	120
P49792	2592
P51858	80
P52597	72
P52739	601
P54253	16
P54253	194
P54253	609
P54253	696
P54253	745
P54841	297
P54841	32
P54846	20
P54846	24
P55265	418
P57739	218
P58012	25
P61085	14
P61978	422
P62508	40
P80204	389
Q00613	298
Q01826	744
Q04206	37
Q04322	498
Q05024	201
Q05024	215
Q06624	35
Q07657	426
Q07657	437
Q13263	554
Q13263	676
Q13263	750
Q13263	779
Q13263	804
Q13285	119
Q13285	194
Q13363	428
Q13426	210
Q13569	330
Q14151	230
Q14164	231
Q14676	1840
Q15022	72
Q15022	73
Q15022	75
Q15788	732
Q15788	774
Q16621	368
Q16665	391
Q16665	477
Q16666	561
Q505F1	238
Q55CL6	105
Q5T5U3	1443
Q60980	10
Q60980	197
Q61164	698
Q61164	74
Q680Q4	100
Q680Q4	488
Q6DJT9	244
Q6DJT9	263
Q86Z02	25
Q8IYA6	198
Q8N2W9	128
Q8N2W9	35
Q8TAD8	30
Q8WW38	324
Q8WW38	471
Q8WW38	915
Q8WW38	955
Q91ZP3	599
Q91ZP3	629
Q92754	10
Q92985	444
Q92985	446
Q92993	430
Q92993	451
Q96QD9	140
Q99497	130
Q9CAE3	287
Q9CAE3	693
Q9CAE3	770
Q9JIX5	609
Q9LSE2	393
Q9NQB0	320
Q9NS56	560
Q9NX24	5
Q9QXZ7	178
Q9QXZ7	315
Q9QXZ7	322
Q9SJN0	391
Q9UBD0	215
Q9UBG0	1142
Q9UER7	630
Q9UER7	631
Q9UG01	4
Q9UHF7	1192
Q9UHF7	1201
Q9UHP3	99
Q9UIS9	499
Q9UIS9	538
Q9UKF6	462
Q9UKF6	465
Q9UKF6	545
Q9ULV5	293
Q9UPN6	18
Q9WTL8	266
Q9Y2W7	26
Q9Y2W7	90
Q9Y2X3	467
Q9Y2X3	497
Q9Y4K3	124
Q9Y4K3	142
Q9Y4K3	453
Q9Y6K9	277
Q9Y6K9	309

## Sheet: Sheet3
proteins	ubiquitination site
A2ASS6	10665
A2ASS6	10679
A2ASS6	10686
A2ASS6	30428
A2ASS6	31008
A2RUR9	955
A3AGM4	148
O14602	88
O14618	189
O14618	216
O14618	241
O14618	76
O14757	436
O14920	163
O14924	1115
O15034	727
O15034	733
O15417	2328
O15503	156
O15503	158
O22042	108
O22042	110
O22203	172
O22203	189
O23404	105
O23522	43
O23522	490
O43474	32
O43684	216
O43707	378
O43933	833
O50008	406
O55143	143
O60610	486
O75081	535
O75367	116
O75367	117
O75581	1403
O80560	946
O82274	19
O94888	99
O94979	1217
O94979	647
O95831	255
O95863	137
O95863	146
O95863	98
P00533	716
P00533	737
P00533	754
P00533	867
P00533	929
P00533	970
P01100	113
P01903	244
P04035	248
P04035	89
P04050	695
P04275	1720
P04608	71
P04637	291
P04844	154
P05030	555
P05030	566
P05030	644
P06401	388
P06746	41
P06746	61
P06746	81
P07262	325
P07262	371
P07737	54
P08195	147
P08539	165
P08908	334
P09629	191
P09629	193
P0C215	88
P0CH28	48
P0CX12	18
P0CX12	205
P10071	773
P10071	779
P10071	784
P10071	800
P10275	845
P10275	847
P10636	571
P10636	628
P10636	670
P10827	190
P12004	164
P12866	1022
P13569	688
P13762	254
P13797	168
P14351	14
P14351	15
P14351	18
P14351	34
P14351	53
P14359	125
P14753	280
P14753	452
P15873	164
P15919	233
P16603	666
P18858	422
P22227	213
P22227	215
P25297	298
P25297	6
P25322	269
P25360	102
P25694	594
P25694	673
P25786	115
P25786	208
P25963	21
P25963	22
P26569	156
P26569	165
P26639	222
P27635	188
P29144	1005
P29144	1013
P29465	136
P29590	380
P29590	400
P29590	401
P29590	476
P29994	1572
P29994	1772
P29994	1885
P29994	1886
P29994	1887
P29994	1902
P29994	1925
P29994	2119
P29994	2258
P29994	916
P29994	962
P30415	1249
P30605	573
P31109	63
P31539	620
P31629	2092
P31644	355
P32288	324
P32353	324
P32353	344
P32476	284
P32476	311
P32657	1144
P32798	301
P33302	825
P34222	152
P34231	697
P35056	18
P35056	24
P35723	190
P36035	338
P36035	9
P36134	17
P36404	71
P37303	228
P38075	29
P38079	286
P38080	1008
P38080	1046
P38167	1024
P38167	577
P38167	651
P38167	712
P38167	794
P38167	807
P38261	219
P38356	312
P38695	61
P38701	8
P38748	369
P38748	410
P38809	187
P38809	242
P38809	78
P39547	11
P39547	218
P39743	481
P39976	17
P40043	68
P40087	171
P40087	257
P40238	553
P40238	573
P40325	18
P40325	3
P40531	305
P40531	313
P40989	806
P41235	234
P41235	307
P41544	15
P43023	70
P43590	50
P47079	15
P47870	45
P47914	56
P47914	73
P48813	132
P48813	34
P48813	41
P49756	477
P50544	332
P51571	73
P51610	105
P51610	163
P51610	1807
P51610	1808
P51610	244
P51610	363
P51665	180
P53045	96
P53253	10
P53281	41
P53281	79
P53322	283
P53370	76
P53924	211
P53924	256
P53924	258
P53924	288
P53924	310
P53924	333
P53924	343
P53924	346
P53924	366
P53924	406
P53924	412
P53924	423
P54781	164
P54781	198
P55061	7
P57058	483
P57076	210
P57078	145
P57078	51
P60484	13
P60484	289
P60900	59
P62191	237
P63092	300
P63279	18
P89105	196
P93821	16
P98155	839
P98170	322
P98170	328
Q00653	855
Q01105	154
Q01628	104
Q01628	24
Q01628	83
Q01628	88
Q01650	19
Q01650	30
Q01705	1749
Q01955	1414
Q02218	534
Q02224	1937
Q02785	426
Q02908	453
Q03001	5470
Q03164	216
Q03164	220
Q03164	221
Q03559	26
Q03559	32
Q06408	588
Q06991	260
Q07307	572
Q07622	184
Q07820	136
Q07820	194
Q07820	197
Q07820	40
Q07820	5
Q07963	709
Q08245	45
Q08245	57
Q08412	396
Q08412	76
Q08960	496
Q0WPQ2	751
Q10589	18
Q12502	486
Q12691	196
Q12734	841
Q12834	485
Q12834	490
Q12933	31
Q12955	4338
Q13077	185
Q13077	193
Q13347	282
Q13485	519
Q13568	411
Q13568	412
Q13616	708
Q13619	33
Q14974	206
Q15004	15
Q15004	24
Q15047	182
Q15058	275
Q15349	630
Q15431	295
Q16186	34
Q31125	317
Q38799	247
Q38799	254
Q38799	34
Q39017	491
Q39017	500
Q39161	103
Q3KQU3	439
Q3T8J9	534
Q56WK6	285
Q5HYJ3	225
Q5JSZ5	1510
Q5T848	774
Q5TB80	908
Q5TEA6	101
Q5VZK9	593
Q60821	388
Q60821	472
Q6AI14	352
Q6NZP1	322
Q6PI98	21
Q6PI98	22
Q6PI98	41
Q6S8J3	684
Q709C8	2357
Q7L590	627
Q7M6Z4	1084
Q84VQ0	464
Q86UP2	309
Q86WV6	150
Q8BID6	46
Q8IX12	637
Q8N0X7	362
Q8N442	102
Q8NBU5	46
Q8NCM2	785
Q8NE71	573
Q8NE71	582
Q8NFC6	2981
Q8NFC6	2982
Q8RXK2	190
Q8RXK2	726
Q8WXE1	96
Q8WZA1	537
Q8WZA1	538
Q923B3	15
Q92581	443
Q92817	1467
Q96514	82
Q96JH7	870
Q96M89	295
Q96S55	141
Q96S55	225
Q96S55	301
Q96S55	310
Q96S55	316
Q96S55	322
Q96S55	335
Q96S55	482
Q96S55	627
Q96S55	636
Q96S55	81
Q96T88	385
Q99569	611
Q99728	423
Q99755	103
Q9BVV6	380
Q9BXW9	561
Q9C093	982
Q9CQ69	33
Q9CQJ4	112
Q9D3D9	136
Q9D5U8	73
Q9D5U8	83
Q9FFC7	773
Q9H3M7	212
Q9H8W5	371
Q9HCC9	87
Q9HCE7	381
Q9HCE7	383
Q9LD55	61
Q9LK36	15
Q9LR74	101
Q9NPD8	182
Q9NPD8	91
Q9NR48	402
Q9NR48	406
Q9NSV4	139
Q9NTX7	131
Q9NTX7	176
Q9NTX7	85
Q9NTX7	95
Q9NUD5	45
Q9NVI1	523
Q9P2N5	653
Q9SIP7	62
Q9SJL6	113
Q9SJQ6	901
Q9SLK6	625
Q9SLK6	717
Q9UHD2	670
Q9UHG3	162
Q9UHP3	99
Q9UIF8	1538
Q9UKL3	92
Q9UKL3	93
Q9UKV3	5
Q9WUD1	2
Q9Y228	267
Q9Y253	682
Q9Y253	686
Q9Y253	694
Q9Y253	709
Q9Y2G4	40
Q9Y2N7	467
Q9Y2N7	570
Q9Y3E7	179
Q9Y467	911
Q9Y4B6	280
Q9Y4F5	289
Q9Y4K3	124
Q9Y5W7	196
Q9Y623	1813
Q9Y6K9	111
Q9Y6K9	139
Q9Y6K9	143
Q9Y6K9	226
Q9Y6K9	246
Q9Y6K9	264
Q9Y6K9	277
Q9Y6K9	283
Q9Y6K9	285
Q9Y6K9	292
Q9Y6K9	302
Q9Y6K9	309
Q9Y6K9	321
Q9Y6K9	399
Q9ZQB9	617
Q9ZQB9	620
